# Supplementary material for: Evolution of the immune system of bees: A story of conservation, gains, and losses
Source: Research Square preprint supplement (doi:10.21203/rs.3.rs-7359208/v1), 2025-08-26
Supplement: Supplementary file 1 [file a60c1f1f3837b9687e8a5edd.xlsx]

## Sheet: Index
Additional file 1
Manuscript name: Evolution of the immune system of bees: A story of conservation, gains, and losses
Author list: Hongfei Xu, Ina Köhler, Thomas J. Colgan
Table	Description
Table S1	Species list for homology-based analysis
Table S2	Number of genes of immune-related functional gene families for each bee species
Table S3	List of putative canonical immune genes in each bee species
Table S4	Results of tBLASTn searches for the identification of putative lysozyme homologues in bee species
Table S5	Functional domain annotation of genomic regions encoding for lysozymes using Pfam
Table S6	Individual measures of nucleotide diversity, interspecific divergence, and tissue-specificity of canonical immune genes in Bombus terrestris
Table S7	Output of a generalised additive model examining the relationship between maximum gene group size and dNdS values in select bee species
Table S8	Genomic coordinates for defensin copies in bee species
Table S9	InterProScan annotation of defensin gene copies
Table S10	Examination of signatures of positive selection acting on defensin gene copies
Table S11	Investigation of coding regions for abaecin in the genome assemblies of bee species
Table S12	Functional domain annotation of genomic regions encoding for abaecins using Pfam
Table S13	Transcriptional evidence of abaecin in bee species
Table S14	Comparison of the number of genes per immune-related functional gene group for selected bee species identified in Ensembl and RefSeq annotations
Table S15	Overview of sample information of used transcriptomic resources for Bombus terrestris

## Sheet: Table S1
Table S1: Species list for homology-based analysis
Table S1: The full species list used in our homology-based analysis. For each species, the species name, family, order, NCBI taxonomy ID, assembly name, Genbank accession ID, genome size (bp), assembly level, total length (bp), total ungapped length (bp), contig N50, number of scaffolds, scaffold N50, total number of genes (if available), BUSCO information (complete and single copy), genome annot…
Species	Family	Order	NCBI Taxonomy ID	Assembly name	Genbank accession	Genome size	Assembly level	Total length	Total ungapped length	Number of contigs	Contig N50	Number of scaffolds	Scaffold N50	Total genes	Hymenoptera Complete BUSCO	Hymenoptera single BUSCO	Annotation provider	Predicted proteome file name
Andrena bucephala	Andrenidae	Hymenoptera	1542580	iyAndBuce1.1	GCA_947577245.1	379771409	Chromosome	379771409	379735209	194	7988040	13	110195567	NA	96.8	96.5	Ensembl	Andrena_bucephala-GCA_947577245.1-2023_02-pep
Andrena chrysosceles	Andrenidae	Hymenoptera	1411665	iyAndChry1.1	GCA_963855975.1	520219004	Chromosome	520219004	520189187	963	3481507	813	55528949	NA	96.9	96.6	Ensembl	Andrena_chrysosceles-GCA_963855975.1-2024_04-pep
Andrena dorsata	Andrenidae	Hymenoptera	1411666	iyAndDors1.1	GCA_929108735.1	277321003	Chromosome	277321003	277316003	182	30063116	157	88484888	NA	96.7	96.4	Ensembl	Andrena_dorsata-GCA_929108735.1-2022_03-pep
Andrena fulva	Andrenidae	Hymenoptera	1411667	iyAndFulv1.1	GCA_946251845.1	461711296	Chromosome	461711296	461703096	358	12523661	317	47475851	NA	96.5	96.1	Ensembl	Andrena_fulva-GCA_946251845.1-2023_02-pep
Andrena haemorrhoa	Andrenidae	Hymenoptera	444401	iyAndHaem1.1	GCA_910592295.1	330670691	Chromosome	330670691	330663773	438	13237341	402	41012438	NA	96.8	96.6	Ensembl	Andrena_haemorrhoa-GCA_910592295.1-2021_11-pep
Andrena hattorfiana	Andrenidae	Hymenoptera	1126402	iyAndHatt1.1	GCA_944738655.1	428511216	Chromosome	428510216	428473216	310	10245246	125	79350654	NA	96.3	96.1	Ensembl	Andrena_hattorfiana-GCA_944738655.1-2022_08-pep
Andrena minutula	Andrenidae	Hymenoptera	1190802	iyAndMinu1.1	GCA_929113495.1	380445275	Chromosome	380445275	380396175	569	12677561	358	50233583	NA	96.1	95.8	Ensembl	Andrena_minutula-GCA_929113495.1-2022_03-pep
Andrena trimmerana	Andrenidae	Hymenoptera	1431430	iyAndCara2.1	GCA_952773225.1	446956329	Chromosome	446956329	446936129	769	5669540	668	86761945	NA	97	96.7	Ensembl	Andrena_trimmerana-GCA_952773225.1-2023_10-pep
Anthophora plumipes	Apidae	Hymenoptera	478167	iyAntPlum1.1	GCA_951804975.1	669955111	Chromosome	669955111	669930111	1183	7034000	1058	13921600	NA	97.5	96.9	Ensembl	Anthophora_plumipes-GCA_951804975.1-2024_04-pep
Apis dorsata	Apidae	Hymenoptera	7462	Apis_dorsata_1.3	GCA_000469605.1	230340171	Scaffold	230340171	219173384	45204	8422	4040	732052	12247	96.1	96	NCBI	Apis_dorsata_gca000469605v1rs.Apis_dorsata_1.3.pep.all
Apis florea	Apidae	Hymenoptera	7463	Aflo_1.0	GCA_000184785.2	229015090	Scaffold	228997396	211329429	18378	24915	6983	2863240	12573	94.9	94.8	NCBI	Apis_florea_gca000184785v2rs.Aflo_1.0.pep.all
Apis mellifera	Apidae	Hymenoptera	7460	Amel_HAv3.1	GCA_003254395	225251012	Chromosome	225234541	223920927	227	5382476	176	13619445	12374	97.7	97.6	NCBI	Apis_mellifera.Amel_HAv3.1.pep.all
Bombus affinis	Apidae	Hymenoptera	309941	iyBomAffi1.2	GCF_024516045.1	365123313	Chromosome	365123313	365117301	918	3123606	858	12331690	NA	97.6	97.3	NCBI	Bombus_affinis-GCF_024516045.1-2024_01-pep
Bombus bifarius	Apidae	Hymenoptera	103933	Bbif_JDL3187	GCA_011952205.1	266784621	Scaffold	266784621	266784511	1251	2202782	1249	2202782	13325	97.4	97.1	Ensembl	Bombus_bifarius-GCA_011952205.1-2021_11-pep
Bombus breviceps	Apidae	Hymenoptera	395515	ASM1482592v1	GCA_014825925.1	248124274	Chromosome	248124274	245954581	5272	1044356	1317	14710816	NA	97.4	97.1	Ensembl	Bombus_breviceps-GCA_014825925.1-2021_11-pep
Bombus campestris	Apidae	Hymenoptera	207624	iyBomCamp1.3	GCA_905333015.3	275239257	Chromosome	275239257	275227657	140	6166019	91	12249729	NA	97.7	97.4	Ensembl	Bombus_campestris-GCA_905333015.3-2023_03-pep
Bombus confusus	Apidae	Hymenoptera	217217	ASM1473747v1	GCA_014737475.1	239101172	Scaffold	239101172	238418245	5602	411713	4639	3260211	NA	97.5	97.3	Ensembl	Bombus_confusus-GCA_014737475.1-2021_11-pep
Bombus consobrinus	Apidae	Hymenoptera	130686	ASM1473745v1	GCA_014737455.1	249068899	Scaffold	249068899	248423735	7948	707207	7194	4771016	NA	97.5	97.4	Ensembl	Bombus_consobrinus-GCA_014737455.1-2021_11-pep
Bombus cullumanus	Apidae	Hymenoptera	2562068	ASM1473753v1	GCA_014737535.1	246986414	Scaffold	246986414	246449733	5990	1128213	5480	4580616	NA	97.4	97.2	Ensembl	Bombus_cullumanus-GCA_014737535.1-2021_11-pep
Bombus difficillimus	Apidae	Hymenoptera	395520	ASM1473752v1	GCA_014737525.1	243560081	Scaffold	243560081	242563908	5799	338993	4473	2080359	NA	96.9	96.8	Ensembl	Bombus_difficillimus-GCA_014737525.1-2021_11-pep
Bombus haemorrhoidalis	Apidae	Hymenoptera	207636	ASM1482597v1	GCA_014825975.1	240538686	Chromosome	240538686	239269841	4052	874667	1614	15088228	NA	97.5	97.4	Ensembl	Bombus_haemorrhoidalis-GCA_014825975.1-2021_11-pep
Bombus hortorum	Apidae	Hymenoptera	85660	iyBomHort1.1	GCA_905332935.1	296297395	Chromosome	296297395	296289095	72	10578496	42	17016242	NA	97.7	97.5	Ensembl	Bombus_hortorum-GCA_905332935.1-2021_11-pep
Bombus huntii	Apidae	Hymenoptera	85661	iyBomHunt1.1	GCA_024542735.1	317402180	Chromosome	317402180	317398380	263	9270999	225	17546577	15072	97.6	97.4	Ensembl	Bombus_huntii_gca024542735v1rs.iyBomHunt1.1.pep.all
Bombus hypnorum	Apidae	Hymenoptera	30191	iyBomHypn1.2	GCA_911387925.2	297334159	Chromosome	297334159	297324129	101	11592071	52	24264022	NA	97.6	97.4	Ensembl	Bombus_hypnorum-GCA_911387925.2-2023_03-pep
Bombus ignitus	Apidae	Hymenoptera	130704	ASM1482587v1	GCA_014825875.1	242565149	Chromosome	242565149	240500889	4026	714304	748	15187013	NA	96.3	96.1	Ensembl	Bombus_ignitus-GCA_014825875.1-2022_09-pep
Bombus impatiens	Apidae	Hymenoptera	132113	BIMP_2.2	GCA_000188095.4	246856484	Scaffold	246856484	241984753	16060	59072	5460	1399493	13161	97.4	97.3	Ensembl	Bombus_impatiens.BIMP_2.2.pep.all
Bombus muscorum	Apidae	Hymenoptera	203813	iyBomMusc1.1	GCA_963971185.1	317676412	Chromosome	317676412	317651212	163	3445925	37	19019874	NA	97.7	97.4	Ensembl	Bombus_muscorum-GCA_963971185.1-2024_05-pep
Bombus opulentus	Apidae	Hymenoptera	2024865	ASM1473740v1	GCA_014737405.1	242353651	Scaffold	242353651	241881044	4892	731585	4394	2423045	NA	97.1	96.9	Ensembl	Bombus_opulentus-GCA_014737405.1-2021_11-pep
Bombus pascuorum	Apidae	Hymenoptera	65598	iyBomPasc1.1	GCA_905332965.1	307548333	Chromosome	307548333	307537816	120	8974029	81	17556731	NA	97.8	97.5	Ensembl	Bombus_pascuorum-GCA_905332965.1-2021_11-pep
Bombus picipes	Apidae	Hymenoptera	309970	ASM1473748v1	GCA_014737485.1	253987937	Scaffold	253987937	253102726	8540	377516	7282	5875415	NA	96.5	96.3	Ensembl	Bombus_picipes-GCA_014737485.1-2021_11-pep
Bombus polaris	Apidae	Hymenoptera	130708	ASM1473733v1	GCA_014737335.1	245790074	Scaffold	245790074	245009522	7284	427351	5848	2253597	NA	95.1	94.8	Ensembl	Bombus_polaris-GCA_014737335.1-2021_11-pep
Bombus pratorum	Apidae	Hymenoptera	30194	iyBomPrat1.1	GCA_930367275.1	285050844	Chromosome	285050844	285037311	90	8533403	50	16494161	NA	97.8	97.5	Ensembl	Bombus_pratorum-GCA_930367275.1-2022_03-pep
Bombus pyrosoma	Apidae	Hymenoptera	396416	ASM1482585v1	GCA_014825855.1	254804690	Chromosome	254804690	251769399	9683	781044	4727	15222711	12481	97.6	97.4	Ensembl	Bombus_pyrosoma-GCA_014825855.1-2021_11-pep
Bombus sibiricus	Apidae	Hymenoptera	421273	ASM1473750v1	GCA_014737505.1	262420024	Scaffold	262420024	261534607	15258	561947	14183	3138169	NA	97.4	97.1	Ensembl	Bombus_sibiricus-GCA_014737505.1-2021_11-pep
Bombus skorikovi	Apidae	Hymenoptera	395565	ASM1473735v1	GCA_014737355.1	242038170	Scaffold	242038170	241118398	4260	488970	3042	4338594	NA	97.2	96.7	Ensembl	Bombus_skorikovi-GCA_014737355.1-2021_11-pep
Bombus soroeensis	Apidae	Hymenoptera	184059	ASM1473736v1	GCA_014737365.1	243573539	Scaffold	243573539	242986990	6071	582038	5476	2119699	NA	95.1	95	Ensembl	Bombus_soroeensis-GCA_014737365.1-2021_11-pep
Bombus superbus	Apidae	Hymenoptera	1869276	ASM1473738v1	GCA_014737385.1	230139620	Scaffold	230139620	229757544	1889	988972	1458	6899074	NA	97.5	97.4	Ensembl	Bombus_superbus-GCA_014737385.1-2021_11-pep
Bombus sylvestris	Apidae	Hymenoptera	30201	iyBomSyle1.2	GCA_911622165.2	302565711	Chromosome	302565711	302555563	192	5862009	139	12445291	NA	97.5	97.2	Ensembl	Bombus_sylvestris-GCA_911622165.2-2023_03-pep
Bombus terrestris	Apidae	Hymenoptera	30195	iyBomTerr1.2	GCA_910591885.2	392962041	Chromosome	392962041	392948208	292	6780370	249	14593050	13398	97.6	97.3	Ensembl	GCF_910591885.1_iyBomTerr1.2_protein.faa
Bombus turneri	Apidae	Hymenoptera	686820	ASM1482582v1	GCA_014825825.1	243111512	Chromosome	243111512	242258149	4370	442685	3015	9696427	NA	97.4	97.1	Ensembl	Bombus_turneri-GCA_014825825.1-2021_11-pep
Bombus vancouverensis	Apidae	Hymenoptera	2705178	Bvanc_JDL1245	GCA_011952275.1	282133710	Scaffold	282133710	282133510	1164	3064919	1162	3064919	13687	97.6	97.2	Ensembl	Bombus_vancouverensis_gca011952275v1rs.Bvanc_JDL1245.pep.all
Bombus vestalis	Apidae	Hymenoptera	30202	iyBomVest1.1	GCA_963556215.1	280008802	Chromosome	280008802	279989002	331	3425147	232	11162444	NA	97.6	97.3	Ensembl	Bombus_vestalis-GCA_963556215.1-2024_04-pep
Bombus vosnesenskii	Apidae	Hymenoptera	207650	Bvos_JDL3184-5_v1.1	GCA_011952255.1	275577952	Scaffold	275577952	275576886	1447	2733020	1429	2833310	13527	97.3	97.1	Ensembl	Bombus_vosnesenskii-GCA_011952255.1-2022_09-pep
Bombus waltoni	Apidae	Hymenoptera	395577	ASM1473739v1	GCA_014737395.1	231149577	Scaffold	231149577	230813584	2568	1152409	2240	4657886	NA	97.5	97.4	Ensembl	Bombus_waltoni-GCA_014737395.1-2021_11-pep
Eufriesea mexicana	Apidae	Hymenoptera	516756	ASM148370v1	GCA_001483705.1	596278454	Scaffold	595427025	570206897	212393	39013	187373	352794	11090	96.7	96	NCBI	Eufriesea_mexicana_gca001483705v1rs.ASM148370v1.pep.all
Habropoda laboriosa	Apidae	Hymenoptera	597456	ASM126327v1	GCA_001263275.1	296954667	Scaffold	296954667	286296474	50205	22370	27566	1784116	10352	96.5	96.3	NCBI	Habropoda_laboriosa_gca001263275v1rs.ASM126327v1.pep.all
Nomada fabriciana	Apidae	Hymenoptera	601510	iyNomFabr1.1	GCA_907165295.1	233584371	Chromosome	233584371	233573438	223	13396754	193	18567632	NA	97.5	97.3	Ensembl	Nomada_fabriciana-GCA_907165295.1-2021_11-pep
Nomada ferruginata	Apidae	Hymenoptera	601518	iyNomFerr1.1	GCA_963583965.1	310495469	Chromosome	310495469	310492069	79	12758063	62	17220278	NA	97.2	97	Ensembl	Nomada_ferruginata-GCA_963583965.1-2024_04-pep
Nomada flava	Apidae	Hymenoptera	601523	iyNomFlav1.1	GCA_951802745.1	308415395	Chromosome	308415395	308407595	152	12675410	113	19641500	NA	97.1	96.8	Ensembl	Nomada_flava-GCA_951802745.1-2024_04-pep
Nomada fucata	Apidae	Hymenoptera	481570	iyNomFuca1.1	GCA_948146005.1	264062708	Chromosome	264062708	264046308	118	5664464	36	31296684	NA	97.5	97.3	Ensembl	Nomada_fucata-GCA_948146005.1-2023_02-pep
Nomada hirtipes	Apidae	Hymenoptera	601583	iyNomHirt1.1	GCA_951802735.1	316469816	Chromosome	316469816	316447216	215	4083930	102	17418997	NA	97.1	96.8	Ensembl	Nomada_hirtipes-GCA_951802735.1-2024_04-pep
Nomada lathburiana	Apidae	Hymenoptera	601640	iyNomLath1.1	GCA_963667235.1	269683890	Chromosome	269683890	269680290	100	13077505	82	15962000	NA	97.6	97.5	Ensembl	Nomada_lathburiana-GCA_963667235.1-2024_04-pep
Nomada panzeri	Apidae	Hymenoptera	601768	iyNomPanz2.1	GCA_951802685.1	303898916	Chromosome	303898916	303873116	213	4952858	84	18709531	NA	97.5	97.2	Ensembl	Nomada_panzeri-GCA_951802685.1-2024_04-pep
Nomada ruficornis	Apidae	Hymenoptera	601849	iyNomRufi1.1	GCA_951802695.1	273010833	Chromosome	273010833	272999433	226	7170000	169	14982175	NA	97.2	96.9	Ensembl	Nomada_ruficornis-GCA_951802695.1-2024_04-pep
Colletes gigas	Colletidae	Hymenoptera	935657	ASM1312311v1	GCA_013123115.1	273056604	Scaffold	273056604	273055871	329	6455398	326	8108830	10831	97	96.2	Ensembl	Colletes_gigas-GCA_013123115.1-2021_11-pep
Hylaeus anthracinus	Colletidae	Hymenoptera	313031	UHH_iyHylAnth1.0_haploid	GCF_026225885.1	254516172	Scaffold	254516172	248506149	6746	146258	2526	16178422	NA	96.4	94.9	NCBI	Hylaeus_anthracinus-GCF_026225885.1-2024_01-pep
Hylaeus volcanicus	Colletidae	Hymenoptera	313075	UHH_iyHylVolc1.0_haploid	GCF_026283585.1	252651163	Chromosome	252651163	247139443	7558	120369	1869	30801132	NA	96.5	96.2	NCBI	Hylaeus_volcanicus-GCF_026283585.1-2024_01-pep
Dufourea novaeangliae	Halictidae	Hymenoptera	178035	ASM127255v1	GCA_001272555.1	279505983	Scaffold	279505983	277275324	7790	191865	4178	2549405	10043	96.6	96.4	NCBI	Dufourea_novaeangliae-GCA_001272555.1-2022_07-pep
Lasioglossum lativentre	Halictidae	Hymenoptera	88531	iyLasLatv2.1	GCA_916610255.1	478935738	Chromosome	478935738	478804338	1430	4089460	1143	27713800	NA	96.2	95.7	Ensembl	Lasioglossum_lativentre-GCA_916610255.1-2022_02-pep
Lasioglossum morio	Halictidae	Hymenoptera	88514	iyLasMori1.2	GCA_916610235.2	547197555	Chromosome	547197555	547184855	1151	7092636	1107	17693651	NA	95.6	94.3	Ensembl	Lasioglossum_morio-GCA_916610235.2-2022_03-pep
Lasioglossum pauxillum	Halictidae	Hymenoptera	88516	iyLasPaux1.1	GCA_933228785.1	431986706	Chromosome	431986706	431962106	158	10669560	35	48162910	NA	95.8	95.3	Ensembl	Lasioglossum_pauxillum-GCA_933228785.1-2022_08-pep
Seladonia tumulorum	Halictidae	Hymenoptera	115100	iySelTumu1.3	GCA_913789895.3	404423755	Chromosome	404423755	404420455	163	14963228	151	18583095	NA	96.3	94.8	Ensembl	Seladonia_tumulorum-GCA_913789895.3-2022_03-pep
Sphecodes monilicornis	Halictidae	Hymenoptera	1190790	iySphMoni1.3	GCA_913789915.3	496571470	Chromosome	496571470	496502170	743	7420798	572	27521247	NA	96.2	95.4	Ensembl	Sphecodes_monilicornis-GCA_913789915.3-2022_03-pep
Osmia bicornis	Megachilidae	Hymenoptera	1437191	iOsmBic2.1	GCA_907164935.1	222969496	Chromosome	222969496	222926281	563	9077890	441	10976010	12706	97.1	97	Ensembl	Osmia_bicornis_bicornis-GCA_907164935.1-2021_11-pep
Megachile leachella	Megachilidae	Hymenoptera	1542539	iyMegLeac1.1	GCA_963576845.1	572960844	Chromosome	572960844	572932644	439	4596250	298	15071797	NA	97.2	97.1	Ensembl	Megachile_leachella-GCA_963576845.1-2024_04-pep
Megachile ligniseca	Megachilidae	Hymenoptera	1542540	iyMegLign1.1	GCA_945859555.1	290020865	Chromosome	290020865	290015865	700	14111993	675	14111993	NA	97.2	97.1	Ensembl	Megachile_ligniseca-GCA_945859555.1-2023_02-pep
Megachile rotundata	Megachilidae	Hymenoptera	143995	MROT_1.0	GCA_000220905.1	272660569	Scaffold	272660569	265916502	16706	64153	6266	1699680	11705	97.2	97	NCBI	Megachile_rotundata-GCA_000220905.1-2022_07-pep
Megachile willughbiella	Megachilidae	Hymenoptera	481575	iyMegWill1.2	GCA_945859595.2	413947718	Chromosome	413947718	413942718	347	14767377	337	15284273	NA	97.4	97.3	Ensembl	Megachile_willughbiella-GCA_945859595.2-2023_05-pep
Stelis phaeoptera	Megachilidae	Hymenoptera	2249760	iyStePhae1.1	GCA_943735885.1	301062759	Chromosome	301062759	301058559	203	13395760	182	14114627	NA	97.2	97.1	Ensembl	Stelis_phaeoptera-GCA_943735885.1-2022_08-pep
Macropis europaea	Melittidae	Hymenoptera	253715	iyMacEuro1.2	GCA_916610135.2	546788722	Chromosome	546788722	546640022	2580	8374436	2273	22679440	NA	97.5	97.3	Ensembl	Macropis_europaea-GCA_916610135.2-2024_06-pep
Ectemnius cavifrons	Crabronidae	Hymenoptera	1518028	iyEctCavi1.1	GCA_964023945.1	225310263	Chromosome	225310263	225249263	576	1300186	271	14987736	NA	95.9	95.9	Ensembl	Ectemnius_cavifrons-GCA_964023945.1-2024_05-pep
Ectemnius continuus	Crabronidae	Hymenoptera	1126389	iyEctCont1.1	GCA_910591665.1	260337310	Chromosome	260337310	260316410	411	12091100	347	15408693	NA	95	94.6	Ensembl	Ectemnius_continuus-GCA_910591665.1-2021_11-pep
Ectemnius lituratus	Crabronidae	Hymenoptera	2495015	iyEctLitu1.1	GCA_910593735.1	235157002	Chromosome	235140587	235061987	358	1594160	115	16908772	NA	95.2	95.1	Ensembl	Ectemnius_lituratus-GCA_910593735.1-2021_11-pep
Mimumesa dahlbomi	Crabronidae	Hymenoptera	2495085	iyMimDahl1.1	GCA_917499265.1	286146396	Chromosome	297301941	297287741	412	9606734	362	13287732	NA	97	96.8	Ensembl	Mimumesa_dahlbomi-GCA_917499265.1-2022_02-pep
Nysson spinosus	Crabronidae	Hymenoptera	2495127	iyNysSpin1.2	GCA_910591585.2	314615744	Chromosome	314615744	314593144	217	7396645	158	9740424	NA	96.7	96.7	Ensembl	Nysson_spinosus-GCA_910591585.2-2023_02-pep
Cerceris rybyensis	Philanthidae	Hymenoptera	1167272	iyCerRyby1.1	GCA_910591515.1	418076835	Chromosome	418076835	418060635	710	15223619	671	26175038	NA	96.9	96.7	Ensembl	Cerceris_rybyensis-GCA_910591515.1-2021_11-pep
Nasonia vitripennis	Pteromalidae	Hymenoptera	7425	Nvit_psr_1.1	GCA_009193385	297309692	Chromosome	297309692	297308892	444	7180486	444	7180486	15501	93.6	92.9	NCBI	Nasonia_vitripennis.Nvit_psr_1.1.pep.all
Athalia rosae	Tenthredinidae	Hymenoptera	37344	iyAthRosa1.1	GCA_917208135	171971399	Chromosome	171955050	171938294	71	7096104	14	25530711	13515	95.5	95.3	NCBI	Athalia_rosae_gca917208135v1.iyAthRosa1.1.pep.all
Solenopsis invicta	Formicidae	Hymenoptera	13686	UNIL_Sinv_3.0	GCA_016802725	378117066	Chromosome	378101515	374244835	317	9421447	219	26227205	16996	96.7	96.1	NCBI	Solenopsis_invicta.UNIL_Sinv_3.0.pep.all
Drosophila melanogaster	Drosophilidae	Diptera	7227	BDGP6.46	GCA_000001215.4	143726002	Chromosome	143706478	142553500	2441	21485538	1869	25286936	17868	NA	NA		Drosophila_melanogaster.BDGP6.46.pep.all

## Sheet: Table S2
Table S2: Number of genes of immune-related functional gene families for each bee species
Table S2: The number of genes per immune-related functional gene groups for each species as identified using a homology-based analysis informed by canonical immune genes described for the large earth or buff-tailed bumblebee (Bombus terrestris) by Sadd et al. (Genome Biol, 2015). For each species, the familt it belong to as well as the counts for each immune-related functional gene group are prov…
Family	species	Total	AMP	APHAG	ARK	CASP	CAT	CLIP	CTL	FREP	GALE	GNBP	IAP	IGG	IMD	JAST	LYS	ML	NIM	PGRP	PPO	PRDX	REL	SCR	SOD	SPZ	SRPN	SRRP	TEP	TOLL
Andrenidae	Andrena bucephala	191	5	16	1	5	1	18	10	3	3	3	4	4	8	3	1	4	4	3	1	13	2	14	2	8	13	30	3	9
Andrenidae	Andrena chrysosceles	199	5	16	1	5	1	20	10	3	3	4	4	5	8	3	1	4	5	5	1	13	2	15	3	8	14	28	3	9
Andrenidae	Andrena dorsata	198	4	16	1	5	1	18	10	2	3	4	5	2	8	3	1	2	4	4	5	13	2	14	3	8	17	31	3	9
Andrenidae	Andrena fulva	196	9	16	1	5	1	18	10	3	3	3	4	4	8	4	1	5	4	6	2	14	2	14	2	8	7	29	4	9
Andrenidae	Andrena haemorrhoa	183	4	16	1	5	1	15	10	3	3	2	6	3	8	3	1	3	7	5	1	12	2	14	2	8	7	29	3	9
Andrenidae	Andrena hattorfiana	183	3	16	1	5	1	18	10	2	3	4	6	3	8	3	1	3	4	4	1	12	2	14	3	7	8	29	3	9
Andrenidae	Andrena minutula	194	5	16	1	5	1	22	10	2	3	3	5	3	8	3	1	2	5	4	1	14	2	14	3	9	11	29	3	9
Andrenidae	Andrena trimmerana	195	6	16	1	5	1	21	11	3	3	3	4	4	7	3	1	4	6	5	2	13	2	12	2	8	9	30	3	10
Apidae	Anthophora plumipes	173	2	17	1	5	1	16	10	3	3	2	3	3	8	3	0	4	3	4	1	13	2	12	2	7	8	28	3	9
Apidae	Apis dorsata	176	4	16	1	4	1	16	10	3	3	2	4	2	7	3	2	4	2	4	1	12	3	16	2	6	7	29	3	9
Apidae	Apis florea	188	5	16	1	6	1	17	10	3	3	2	4	5	7	3	2	4	4	4	1	14	4	15	2	6	7	29	3	10
Apidae	Apis mellifera	179	5	16	1	4	1	18	10	3	3	2	5	2	7	3	2	4	3	4	1	13	3	15	2	6	7	27	3	9
Apidae	Bombus affinis	199	5	16	1	5	1	26	10	3	3	2	12	2	7	3	1	4	3	3	1	13	2	15	2	9	10	28	3	9
Apidae	Bombus bifarius	195	3	16	1	6	1	24	11	3	3	2	6	2	6	3	1	4	4	5	1	13	2	15	2	8	11	30	3	9
Apidae	Bombus breviceps	186	4	16	1	5	1	20	10	2	3	2	6	2	7	3	1	3	3	4	1	13	3	15	2	9	8	30	3	9
Apidae	Bombus campestris	188	3	16	1	5	1	21	9	3	3	2	7	2	7	3	1	4	4	3	1	14	2	14	2	8	9	31	3	9
Apidae	Bombus confusus	188	3	16	1	5	1	19	10	2	3	2	5	2	8	3	1	3	3	3	1	13	2	15	2	7	13	32	3	10
Apidae	Bombus consobrinus	188	3	16	1	5	1	20	11	3	3	2	6	3	8	3	1	3	4	4	1	13	4	15	1	7	9	28	3	10
Apidae	Bombus cullumanus	189	3	16	1	5	1	20	10	2	3	2	6	2	8	3	1	4	4	4	1	13	2	16	2	8	12	28	3	9
Apidae	Bombus difficillimus	190	3	16	2	5	1	20	10	3	3	3	6	3	7	3	1	2	4	5	2	13	2	14	2	8	10	30	3	9
Apidae	Bombus haemorrhoidalis	181	3	16	1	5	1	19	10	2	3	2	6	2	7	3	1	3	5	3	1	12	3	15	2	9	9	27	2	9
Apidae	Bombus hortorum	186	3	17	1	5	1	19	10	2	3	3	6	3	7	3	1	3	4	4	1	13	4	15	2	7	7	30	3	9
Apidae	Bombus huntii	194	7	16	1	5	1	26	10	3	3	2	9	2	7	3	1	3	3	3	1	13	2	15	2	8	8	28	3	9
Apidae	Bombus hypnorum	191	4	16	1	5	1	20	10	3	3	2	9	5	8	3	1	3	4	4	1	13	2	14	2	9	8	28	3	9
Apidae	Bombus ignitus	191	3	16	1	5	1	20	10	3	3	2	7	3	7	5	1	3	4	4	1	12	3	14	2	9	10	31	2	9
Apidae	Bombus impatiens	189	4	16	1	5	1	22	10	3	3	2	8	2	7	3	1	4	3	3	1	13	2	15	2	9	9	28	3	9
Apidae	Bombus muscorum	191	3	16	1	5	1	21	10	3	3	2	6	4	9	3	1	4	3	3	1	13	3	15	2	9	6	32	3	9
Apidae	Bombus opulentus	192	3	16	1	5	1	20	10	3	3	2	7	2	8	3	1	3	4	3	1	13	3	15	2	9	12	30	3	9
Apidae	Bombus pascuorum	190	3	16	1	5	1	19	10	3	4	2	6	5	7	3	1	3	4	4	1	12	3	15	2	9	10	29	3	9
Apidae	Bombus picipes	193	3	16	1	5	1	20	11	3	2	2	7	3	7	3	1	4	4	4	1	13	3	14	2	8	12	31	3	9
Apidae	Bombus polaris	186	3	16	2	5	1	19	10	3	3	2	6	4	6	3	1	4	4	4	1	13	2	15	2	7	10	29	2	9
Apidae	Bombus pratorum	189	3	16	1	5	1	21	10	3	3	2	9	3	7	3	1	4	4	5	1	12	2	15	2	8	8	28	3	9
Apidae	Bombus pyrosoma	189	3	16	1	5	1	19	11	2	3	2	6	3	7	3	0	4	4	3	1	13	2	15	2	9	12	31	3	8
Apidae	Bombus sibiricus	190	2	16	1	5	1	20	10	3	3	2	6	2	8	3	1	3	4	5	1	13	3	15	2	8	11	30	3	9
Apidae	Bombus skorikovi	186	3	15	1	5	1	18	11	2	3	2	7	4	8	3	1	3	4	3	1	14	4	14	1	8	9	28	4	9
Apidae	Bombus soroeensis	192	3	16	2	5	1	21	10	2	3	2	6	3	8	3	1	3	4	4	1	13	3	15	2	8	9	31	3	10
Apidae	Bombus superbus	183	3	16	2	5	1	17	10	2	3	2	6	4	7	3	1	4	4	4	1	13	3	15	1	8	10	27	2	9
Apidae	Bombus sylvestris	188	4	16	1	6	1	21	9	3	3	2	6	4	8	3	1	4	4	3	1	14	3	14	2	8	8	27	3	9
Apidae	Bombus terrestris	195	4	16	1	5	1	22	10	3	3	2	12	2	7	3	1	4	3	3	1	13	2	15	2	9	11	28	3	9
Apidae	Bombus turneri	196	4	16	1	5	1	19	11	2	3	2	8	4	8	3	0	4	4	5	1	14	4	15	2	9	10	29	3	9
Apidae	Bombus vancouverensis	195	5	16	1	5	1	24	10	3	3	2	10	2	7	3	1	4	3	4	1	13	2	15	2	9	9	28	3	9
Apidae	Bombus vestalis	181	3	16	1	5	1	19	9	3	3	2	4	3	8	3	1	4	4	3	1	13	2	14	2	9	7	29	3	9
Apidae	Bombus vosnesenskii	198	3	16	1	5	1	27	10	4	3	2	7	3	8	3	1	4	4	4	1	13	2	14	2	8	11	29	3	9
Apidae	Bombus waltoni	191	3	16	2	5	1	21	10	3	3	2	6	2	7	3	1	3	4	5	1	13	3	14	2	7	13	29	3	9
Apidae	Eufriesea mexicana	185	4	16	1	5	1	19	10	3	3	2	3	4	7	3	1	4	3	3	2	13	2	17	2	7	8	29	3	10
Apidae	Habropoda laboriosa	178	4	16	1	5	1	16	10	3	3	2	4	2	7	3	1	4	2	3	2	13	2	16	2	7	7	31	3	8
Apidae	Nomada fabriciana	182	4	16	1	5	1	20	10	2	3	2	4	4	6	3	1	2	3	4	2	14	2	13	2	7	9	29	3	10
Apidae	Nomada ferruginata	188	4	16	1	4	1	22	10	3	3	2	4	5	8	3	1	4	4	4	2	13	2	14	2	8	7	29	3	9
Apidae	Nomada flava	191	4	16	1	5	1	22	10	3	3	2	4	7	7	3	0	4	4	3	2	14	2	14	2	8	7	31	3	9
Apidae	Nomada fucata	193	4	16	1	5	1	21	10	3	3	2	4	5	8	3	1	3	5	4	2	13	2	15	2	8	9	31	3	9
Apidae	Nomada hirtipes	187	4	16	1	5	1	22	10	3	3	2	3	4	8	3	1	4	4	4	2	13	2	14	2	8	6	29	4	9
Apidae	Nomada lathburiana	187	3	16	1	5	1	22	10	3	3	2	3	5	7	3	0	4	4	4	2	13	2	14	2	9	7	29	3	10
Apidae	Nomada panzeri	192	4	16	1	5	1	22	10	3	3	2	4	5	7	3	1	4	4	4	2	14	2	15	2	8	7	31	3	9
Apidae	Nomada ruficornis	199	4	16	1	5	1	26	10	3	3	2	4	4	8	3	1	4	4	4	2	14	2	18	2	8	7	30	3	10
Colletidae	Colletes gigas	178	4	16	1	5	1	15	10	2	3	2	4	3	7	3	1	4	2	4	1	13	2	15	2	6	10	29	4	9
Colletidae	Hylaeus anthracinus	184	2	17	1	4	1	20	10	3	3	2	4	2	8	3	4	4	3	4	1	13	2	17	2	7	7	28	3	9
Colletidae	Hylaeus volcanicus	187	3	17	1	4	1	18	10	2	3	2	4	2	7	3	2	4	2	4	1	13	2	16	2	7	8	37	3	9
Halictidae	Dufourea novaeangliae	176	4	16	1	5	1	18	8	3	3	2	3	3	7	3	2	4	2	3	2	13	2	15	2	5	7	30	3	9
Halictidae	Lasioglossum lativentre	180	6	16	1	5	2	17	10	3	3	3	5	2	7	3	1	3	3	4	2	12	2	15	2	7	6	28	3	9
Halictidae	Lasioglossum morio	187	5	16	1	5	1	20	10	2	3	5	7	2	7	3	0	3	4	4	3	12	2	14	2	7	8	27	5	9
Halictidae	Lasioglossum pauxillum	193	4	16	2	5	1	18	10	2	3	6	7	2	7	4	0	3	3	3	3	12	2	14	2	7	14	31	3	9
Halictidae	Seladonia tumulorum	196	5	15	1	4	1	19	11	3	3	3	8	7	7	3	2	5	3	3	3	13	2	19	1	7	7	31	3	7
Halictidae	Sphecodes monilicornis	186	7	16	1	6	1	17	11	2	3	5	5	2	7	3	1	3	3	3	4	13	2	14	2	7	7	29	3	9
Megachilidae	Megachile leachella	193	4	15	1	5	1	21	10	4	3	2	3	4	8	3	1	3	4	5	1	12	2	15	2	8	11	29	4	12
Megachilidae	Megachile ligniseca	189	4	17	1	5	1	18	10	3	3	2	3	3	8	3	1	4	4	5	1	13	2	14	1	9	9	32	3	10
Megachilidae	Megachile rotundata	181	4	16	1	4	1	20	10	3	3	2	4	2	7	3	1	4	1	4	1	13	2	15	2	8	8	29	3	10
Megachilidae	Megachile willughbiella	189	4	16	1	5	1	19	10	3	3	2	4	4	8	4	1	4	3	5	1	12	2	14	2	8	8	30	3	12
Megachilidae	Osmia bicornis	179	6	15	1	6	1	17	10	2	3	2	4	3	7	3	0	4	4	3	1	12	2	15	2	8	7	29	3	9
Megachilidae	Stelis phaeoptera	177	6	16	1	6	1	16	11	3	3	2	4	2	7	3	0	3	3	5	1	12	2	14	2	6	7	27	4	10
Melittidae	Macropis europaea	172	4	16	1	7	1	18	8	3	3	2	3	3	8	3	0	3	5	2	1	12	2	12	2	7	7	27	3	9
Crabronidae	Ectemnius cavifrons	176	2	16	1	5	1	19	10	3	3	1	3	3	6	3	1	5	4	3	1	13	2	15	2	7	8	28	3	8
Crabronidae	Ectemnius continuus	184	1	16	1	6	1	18	10	5	4	2	4	3	6	4	1	4	2	3	1	16	2	18	2	6	8	28	3	9
Crabronidae	Ectemnius lituratus	174	2	16	2	4	1	19	10	3	3	3	4	3	6	3	0	4	4	2	1	13	2	15	2	7	7	26	3	9
Crabronidae	Mimumesa dahlbomi	192	4	16	1	5	2	24	12	3	3	3	5	3	7	4	1	3	4	4	1	14	2	14	2	6	7	31	3	8
Crabronidae	Nysson spinosus	175	3	16	1	5	1	16	9	3	3	2	3	4	7	3	0	4	3	4	1	12	2	13	1	9	8	30	3	9
Philanthidae	Cerceris rybyensis	176	4	16	1	5	1	18	9	3	3	2	4	4	7	3	0	2	3	4	1	12	2	16	2	5	9	28	3	9
Pteromalidae	Nasonia vitripennis	208	8	16	1	5	1	23	11	2	3	3	4	2	6	3	1	7	2	11	3	13	2	18	2	5	9	32	3	12
Tenthredinidae	Athalia rosae	201	4	16	1	5	1	24	10	2	3	2	5	3	6	3	1	4	5	4	2	15	2	15	2	9	13	30	3	11
Formicidae	Solenopsis invicta	207	4	15	1	8	1	26	10	3	3	2	4	2	7	3	1	8	3	6	1	14	2	19	2	8	6	36	3	9
Drosophilidae	Drosophila melanogaster	235	1	18	1	5	2	29	10	3	4	3	4	1	8	4	3	7	10	10	3	15	3	23	2	5	12	34	5	10
	Max	235	9	18	2	8	2	29	12	5	4	6	12	7	9	5	4	8	10	11	5	16	4	23	3	9	17	37	5	12
	Min	172	1	15	1	4	1	15	8	2	2	1	3	1	6	3	0	2	1	2	1	12	2	12	1	5	6	26	2	7
	Mean	188.65	3.875	16.025	1.0875	5.05	1.0375	20	10.05	2.775	3.025	2.3375	5.3375	3.1375	7.3	3.1	0.975	3.725	3.725	4.025	1.4125	13.0375	2.3125	14.925	1.975	7.6625	8.975	29.4625	3.075	9.225
	Median	189	4	16	1	5	1	20	10	3	3	2	5	3	7	3	1	4	4	4	1	13	2	15	2	8	8	29	3	9
	SD	9.12154	1.35439	0.417582	0.282566	0.589491	0.189984	2.80179	0.589491	0.547152	0.222205	0.78968	1.9554	1.18051	0.659545	0.339116	0.631961	0.974359	1.16163	1.31315	0.769639	0.765568	0.582961	1.57142	0.352668	1.08333	2.21909	1.85704	0.468375	0.774193
	CV	0.0483517	0.34952	0.0260582	0.259831	0.116731	0.183117	0.140089	0.0586559	0.197172	0.0734562	0.337831	0.366352	0.376257	0.0903487	0.109392	0.648165	0.261573	0.311846	0.32625	0.544877	0.0587204	0.252091	0.105288	0.178566	0.14138	0.247253	0.0630306	0.152317	0.0839234
	MAD	5	1	0	0	0	0	2	0	0	0	0	1	1	0	0	0	0	0	1	0	0	0	1	0	1	1	1	0	0
	Range	63	8	3	1	4	1	14	4	3	2	5	9	6	3	2	4	6	9	9	4	4	2	11	2	4	11	11	3	5

## Sheet: Table S3
Table S3: List of putative canonical immune genes in each bee species
Table S3: The complete list of putative canonical immune genes found in each species that we examined as part of our homology-based analysis. For each species, we provide the family, the immune-related functional gene group, the orthogroup, as well as the locus. Abbreviations: AMP = Antimicrobial peptide; APHAG = Autophagy; ARK = Death-associated APAF1-related killer; CASP = Caspase; CAT = Catala…
Family	Species	Gene Group	Orthogroup	Locus
Andrenidae	Andrena bucephala	AMP	OG0000327	ENSRADG00005002384.1
Andrenidae	Andrena bucephala	AMP	OG0000327	ENSRADG00005002540.1
Andrenidae	Andrena bucephala	AMP	OG0000327	ENSRADG00005003832.1
Andrenidae	Andrena bucephala	AMP	OG0001334	ENSRADG00005001697.1
Andrenidae	Andrena bucephala	AMP	OG0009601	ENSRADG00005002402.1
Andrenidae	Andrena bucephala	APHAG	OG0002446	ENSRADG00005003800.1
Andrenidae	Andrena bucephala	APHAG	OG0003831	ENSRADG00005004857.1
Andrenidae	Andrena bucephala	APHAG	OG0003933	ENSRADG00005008087.1
Andrenidae	Andrena bucephala	APHAG	OG0004139	ENSRADG00005010502.1
Andrenidae	Andrena bucephala	APHAG	OG0004673	ENSRADG00005000800.1
Andrenidae	Andrena bucephala	APHAG	OG0004786	ENSRADG00005001517.1
Andrenidae	Andrena bucephala	APHAG	OG0004829	ENSRADG00005001760.1
Andrenidae	Andrena bucephala	APHAG	OG0005197	ENSRADG00005006033.1
Andrenidae	Andrena bucephala	APHAG	OG0005491	ENSRADG00005007767.1
Andrenidae	Andrena bucephala	APHAG	OG0005702	ENSRADG00005010966.1
Andrenidae	Andrena bucephala	APHAG	OG0005834	ENSRADG00005012556.1
Andrenidae	Andrena bucephala	APHAG	OG0005983	ENSRADG00005012856.1
Andrenidae	Andrena bucephala	APHAG	OG0006450	ENSRADG00005002133.1
Andrenidae	Andrena bucephala	APHAG	OG0006519	ENSRADG00005003573.1
Andrenidae	Andrena bucephala	APHAG	OG0006769	ENSRADG00005010222.1
Andrenidae	Andrena bucephala	APHAG	OG0006880	ENSRADG00005011635.1
Andrenidae	Andrena bucephala	ARK	OG0001701	ENSRADG00005015398.1
Andrenidae	Andrena bucephala	CASP	OG0000247	ENSRADG00005000944.1
Andrenidae	Andrena bucephala	CASP	OG0000247	ENSRADG00005003250.1
Andrenidae	Andrena bucephala	CASP	OG0002045	ENSRADG00005000209.1
Andrenidae	Andrena bucephala	CASP	OG0002713	ENSRADG00005000365.1
Andrenidae	Andrena bucephala	CASP	OG0003548	ENSRADG00005001814.1
Andrenidae	Andrena bucephala	CAT	OG0002400	ENSRADG00005002403.1
Andrenidae	Andrena bucephala	CLIP	OG0000100	ENSRADG00005014671.1
Andrenidae	Andrena bucephala	CLIP	OG0000489	ENSRADG00005003935.1
Andrenidae	Andrena bucephala	CLIP	OG0000857	ENSRADG00005013791.1
Andrenidae	Andrena bucephala	CLIP	OG0000857	ENSRADG00005014417.1
Andrenidae	Andrena bucephala	CLIP	OG0001104	ENSRADG00005006014.1
Andrenidae	Andrena bucephala	CLIP	OG0001286	ENSRADG00005008260.1
Andrenidae	Andrena bucephala	CLIP	OG0001530	ENSRADG00005007242.1
Andrenidae	Andrena bucephala	CLIP	OG0003918	ENSRADG00005007839.1
Andrenidae	Andrena bucephala	CLIP	OG0003952	ENSRADG00005008515.1
Andrenidae	Andrena bucephala	CLIP	OG0004548	ENSRADG00005000059.1
Andrenidae	Andrena bucephala	CLIP	OG0005173	ENSRADG00005004201.1
Andrenidae	Andrena bucephala	CLIP	OG0005417	ENSRADG00005008491.1
Andrenidae	Andrena bucephala	CLIP	OG0005447	ENSRADG00005008974.1
Andrenidae	Andrena bucephala	CLIP	OG0005762	ENSRADG00005011597.1
Andrenidae	Andrena bucephala	CLIP	OG0006813	ENSRADG00005011779.1
Andrenidae	Andrena bucephala	CLIP	OG0006967	ENSRADG00005013792.1
Andrenidae	Andrena bucephala	CLIP	OG0007332	ENSRADG00005012405.1
Andrenidae	Andrena bucephala	CLIP	OG0007742	ENSRADG00005008050.1
Andrenidae	Andrena bucephala	CTL	OG0001740	ENSRADG00005002504.1
Andrenidae	Andrena bucephala	CTL	OG0001823	ENSRADG00005012093.1
Andrenidae	Andrena bucephala	CTL	OG0003176	ENSRADG00005012744.1
Andrenidae	Andrena bucephala	CTL	OG0004881	ENSRADG00005002081.1
Andrenidae	Andrena bucephala	CTL	OG0005639	ENSRADG00005010164.1
Andrenidae	Andrena bucephala	CTL	OG0005791	ENSRADG00005011937.1
Andrenidae	Andrena bucephala	CTL	OG0006335	ENSRADG00005000308.1
Andrenidae	Andrena bucephala	CTL	OG0006524	ENSRADG00005003619.1
Andrenidae	Andrena bucephala	CTL	OG0006792	ENSRADG00005011050.1
Andrenidae	Andrena bucephala	CTL	OG0008136	ENSRADG00005010117.1
Andrenidae	Andrena bucephala	FREP	OG0000388	ENSRADG00005008385.1
Andrenidae	Andrena bucephala	FREP	OG0000388	ENSRADG00005010589.1
Andrenidae	Andrena bucephala	FREP	OG0001750	ENSRADG00005003102.1
Andrenidae	Andrena bucephala	GALE	OG0003190	ENSRADG00005013253.1
Andrenidae	Andrena bucephala	GALE	OG0004011	ENSRADG00005008060.1
Andrenidae	Andrena bucephala	GALE	OG0006683	ENSRADG00005009256.1
Andrenidae	Andrena bucephala	GNBP	OG0000914	ENSRADG00005011336.1
Andrenidae	Andrena bucephala	GNBP	OG0000914	ENSRADG00005011736.1
Andrenidae	Andrena bucephala	GNBP	OG0001694	ENSRADG00005013537.1
Andrenidae	Andrena bucephala	IAP	OG0000199	ENSRADG00005001576.1
Andrenidae	Andrena bucephala	IAP	OG0000199	ENSRADG00005012948.1
Andrenidae	Andrena bucephala	IAP	OG0003978	ENSRADG00005009038.1
Andrenidae	Andrena bucephala	IAP	OG0004007	ENSRADG00005007899.1
Andrenidae	Andrena bucephala	IGG	OG0000504	ENSRADG00005014204.1
Andrenidae	Andrena bucephala	IGG	OG0000504	ENSRADG00005015188.1
Andrenidae	Andrena bucephala	IGG	OG0000504	ENSRADG00005015585.1
Andrenidae	Andrena bucephala	IGG	OG0000512	ENSRADG00005015064.1
Andrenidae	Andrena bucephala	IMD	OG0000611	ENSRADG00005007953.1
Andrenidae	Andrena bucephala	IMD	OG0000611	ENSRADG00005008889.1
Andrenidae	Andrena bucephala	IMD	OG0003945	ENSRADG00005008374.1
Andrenidae	Andrena bucephala	IMD	OG0005010	ENSRADG00005002848.1
Andrenidae	Andrena bucephala	IMD	OG0006148	ENSRADG00005013739.1
Andrenidae	Andrena bucephala	IMD	OG0006188	ENSRADG00005014529.1
Andrenidae	Andrena bucephala	IMD	OG0006444	ENSRADG00005002085.1
Andrenidae	Andrena bucephala	IMD	OG0008396	ENSRADG00005005215.1
Andrenidae	Andrena bucephala	JAST	OG0002385	ENSRADG00005001991.1
Andrenidae	Andrena bucephala	JAST	OG0002504	ENSRADG00005008565.1
Andrenidae	Andrena bucephala	JAST	OG0002998	ENSRADG00005008622.1
Andrenidae	Andrena bucephala	LYS	OG0007140	ENSRADG00005002666.1
Andrenidae	Andrena bucephala	ML	OG0001994	ENSRADG00005013506.1
Andrenidae	Andrena bucephala	ML	OG0002469	ENSRADG00005005114.1
Andrenidae	Andrena bucephala	ML	OG0008465	ENSRADG00005008517.1
Andrenidae	Andrena bucephala	ML	OG0008732	ENSRADG00005007555.1
Andrenidae	Andrena bucephala	NIM	OG0000346	ENSRADG00005004717.1
Andrenidae	Andrena bucephala	NIM	OG0000346	ENSRADG00005008076.1
Andrenidae	Andrena bucephala	NIM	OG0002945	ENSRADG00005005621.1
Andrenidae	Andrena bucephala	NIM	OG0008120	ENSRADG00005007589.1
Andrenidae	Andrena bucephala	PGRP	OG0000398	ENSRADG00005001921.1
Andrenidae	Andrena bucephala	PGRP	OG0001034	ENSRADG00005011592.1
Andrenidae	Andrena bucephala	PGRP	OG0001352	ENSRADG00005004105.1
Andrenidae	Andrena bucephala	PPO	OG0000644	ENSRADG00005006590.1
Andrenidae	Andrena bucephala	PRDX	OG0000204	ENSRADG00005004192.1
Andrenidae	Andrena bucephala	PRDX	OG0000204	ENSRADG00005006529.1
Andrenidae	Andrena bucephala	PRDX	OG0000339	ENSRADG00005010569.1
Andrenidae	Andrena bucephala	PRDX	OG0000339	ENSRADG00005014182.1
Andrenidae	Andrena bucephala	PRDX	OG0001974	ENSRADG00005010483.1
Andrenidae	Andrena bucephala	PRDX	OG0001986	ENSRADG00005012122.1
Andrenidae	Andrena bucephala	PRDX	OG0002022	ENSRADG00005013985.1
Andrenidae	Andrena bucephala	PRDX	OG0004270	ENSRADG00005013553.1
Andrenidae	Andrena bucephala	PRDX	OG0004336	ENSRADG00005012920.1
Andrenidae	Andrena bucephala	PRDX	OG0004664	ENSRADG00005000761.1
Andrenidae	Andrena bucephala	PRDX	OG0005353	ENSRADG00005007434.1
Andrenidae	Andrena bucephala	PRDX	OG0005561	ENSRADG00005009378.1
Andrenidae	Andrena bucephala	PRDX	OG0006684	ENSRADG00005009265.1
Andrenidae	Andrena bucephala	REL	OG0000812	ENSRADG00005015278.1
Andrenidae	Andrena bucephala	REL	OG0003522	ENSRADG00005001586.1
Andrenidae	Andrena bucephala	SCR	OG0000321	ENSRADG00005001146.1
Andrenidae	Andrena bucephala	SCR	OG0000431	ENSRADG00005013923.1
Andrenidae	Andrena bucephala	SCR	OG0000431	ENSRADG00005015700.1
Andrenidae	Andrena bucephala	SCR	OG0000984	ENSRADG00005015760.1
Andrenidae	Andrena bucephala	SCR	OG0001434	ENSRADG00005003845.1
Andrenidae	Andrena bucephala	SCR	OG0002021	ENSRADG00005013818.1
Andrenidae	Andrena bucephala	SCR	OG0002535	ENSRADG00005009620.1
Andrenidae	Andrena bucephala	SCR	OG0002620	ENSRADG00005013737.1
Andrenidae	Andrena bucephala	SCR	OG0003366	ENSRADG00005000335.1
Andrenidae	Andrena bucephala	SCR	OG0003844	ENSRADG00005005586.1
Andrenidae	Andrena bucephala	SCR	OG0004910	ENSRADG00005002247.1
Andrenidae	Andrena bucephala	SCR	OG0006301	ENSRADG00005015759.1
Andrenidae	Andrena bucephala	SCR	OG0006498	ENSRADG00005003161.1
Andrenidae	Andrena bucephala	SCR	OG0007701	ENSRADG00005003118.1
Andrenidae	Andrena bucephala	SOD	OG0000245	ENSRADG00005014751.1
Andrenidae	Andrena bucephala	SOD	OG0000245	ENSRADG00005015346.1
Andrenidae	Andrena bucephala	SPZ	OG0000086	ENSRADG00005002441.1
Andrenidae	Andrena bucephala	SPZ	OG0000086	ENSRADG00005002634.1
Andrenidae	Andrena bucephala	SPZ	OG0000086	ENSRADG00005006915.1
Andrenidae	Andrena bucephala	SPZ	OG0000409	ENSRADG00005000803.1
Andrenidae	Andrena bucephala	SPZ	OG0000409	ENSRADG00005007758.1
Andrenidae	Andrena bucephala	SPZ	OG0002737	ENSRADG00005000799.1
Andrenidae	Andrena bucephala	SPZ	OG0004631	ENSRADG00005000535.1
Andrenidae	Andrena bucephala	SPZ	OG0007508	ENSRADG00005006070.1
Andrenidae	Andrena bucephala	SRPN	OG0000122	ENSRADG00005002785.1
Andrenidae	Andrena bucephala	SRPN	OG0000122	ENSRADG00005010386.1
Andrenidae	Andrena bucephala	SRPN	OG0000122	ENSRADG00005011478.1
Andrenidae	Andrena bucephala	SRPN	OG0000122	ENSRADG00005011614.1
Andrenidae	Andrena bucephala	SRPN	OG0000122	ENSRADG00005012805.1
Andrenidae	Andrena bucephala	SRPN	OG0000122	ENSRADG00005012895.1
Andrenidae	Andrena bucephala	SRPN	OG0001063	ENSRADG00005009268.1
Andrenidae	Andrena bucephala	SRPN	OG0001356	ENSRADG00005005542.1
Andrenidae	Andrena bucephala	SRPN	OG0001590	ENSRADG00005000318.1
Andrenidae	Andrena bucephala	SRPN	OG0001590	ENSRADG00005006516.1
Andrenidae	Andrena bucephala	SRPN	OG0001714	ENSRADG00005000792.1
Andrenidae	Andrena bucephala	SRPN	OG0001714	ENSRADG00005007780.1
Andrenidae	Andrena bucephala	SRPN	OG0004321	ENSRADG00005012464.1
Andrenidae	Andrena bucephala	SRRP	OG0000178	ENSRADG00005003413.1
Andrenidae	Andrena bucephala	SRRP	OG0000178	ENSRADG00005003725.1
Andrenidae	Andrena bucephala	SRRP	OG0000190	ENSRADG00005011839.1
Andrenidae	Andrena bucephala	SRRP	OG0000190	ENSRADG00005013418.1
Andrenidae	Andrena bucephala	SRRP	OG0000757	ENSRADG00005000533.1
Andrenidae	Andrena bucephala	SRRP	OG0000757	ENSRADG00005002662.1
Andrenidae	Andrena bucephala	SRRP	OG0000905	ENSRADG00005005267.1
Andrenidae	Andrena bucephala	SRRP	OG0000905	ENSRADG00005010974.1
Andrenidae	Andrena bucephala	SRRP	OG0001417	ENSRADG00005001457.1
Andrenidae	Andrena bucephala	SRRP	OG0001672	ENSRADG00005011727.1
Andrenidae	Andrena bucephala	SRRP	OG0001984	ENSRADG00005011325.1
Andrenidae	Andrena bucephala	SRRP	OG0001998	ENSRADG00005012332.1
Andrenidae	Andrena bucephala	SRRP	OG0002044	ENSRADG00005000099.1
Andrenidae	Andrena bucephala	SRRP	OG0002165	ENSRADG00005008429.1
Andrenidae	Andrena bucephala	SRRP	OG0002220	ENSRADG00005010443.1
Andrenidae	Andrena bucephala	SRRP	OG0002344	ENSRADG00005001060.1
Andrenidae	Andrena bucephala	SRRP	OG0002370	ENSRADG00005001602.1
Andrenidae	Andrena bucephala	SRRP	OG0002466	ENSRADG00005004782.1
Andrenidae	Andrena bucephala	SRRP	OG0002592	ENSRADG00005014175.1
Andrenidae	Andrena bucephala	SRRP	OG0003358	ENSRADG00005000272.1
Andrenidae	Andrena bucephala	SRRP	OG0003433	ENSRADG00005000849.1
Andrenidae	Andrena bucephala	SRRP	OG0003566	ENSRADG00005002045.1
Andrenidae	Andrena bucephala	SRRP	OG0003841	ENSRADG00005005436.1
Andrenidae	Andrena bucephala	SRRP	OG0004198	ENSRADG00005011586.1
Andrenidae	Andrena bucephala	SRRP	OG0004356	ENSRADG00005013664.1
Andrenidae	Andrena bucephala	SRRP	OG0004686	ENSRADG00005000890.1
Andrenidae	Andrena bucephala	SRRP	OG0004768	ENSRADG00005001406.1
Andrenidae	Andrena bucephala	SRRP	OG0005922	ENSRADG00005011001.1
Andrenidae	Andrena bucephala	SRRP	OG0006338	ENSRADG00005000399.1
Andrenidae	Andrena bucephala	SRRP	OG0007357	ENSRADG00005012424.1
Andrenidae	Andrena bucephala	TEP	OG0002197	ENSRADG00005009149.1
Andrenidae	Andrena bucephala	TEP	OG0003051	ENSRADG00005008738.1
Andrenidae	Andrena bucephala	TEP	OG0004656	ENSRADG00005000675.1
Andrenidae	Andrena bucephala	TOLL	OG0001398	ENSRADG00005015481.1
Andrenidae	Andrena bucephala	TOLL	OG0001682	ENSRADG00005011699.1
Andrenidae	Andrena bucephala	TOLL	OG0002313	ENSRADG00005000232.1
Andrenidae	Andrena bucephala	TOLL	OG0003414	ENSRADG00005000726.1
Andrenidae	Andrena bucephala	TOLL	OG0003660	ENSRADG00005002877.1
Andrenidae	Andrena bucephala	TOLL	OG0004590	ENSRADG00005000295.1
Andrenidae	Andrena bucephala	TOLL	OG0004619	ENSRADG00005000498.1
Andrenidae	Andrena bucephala	TOLL	OG0007017	ENSRADG00005015125.1
Andrenidae	Andrena bucephala	TOLL	OG0007609	ENSRADG00005012001.1
Andrenidae	Andrena chrysosceles	AMP	OG0000327	ENSEQOG00000011138.1
Andrenidae	Andrena chrysosceles	AMP	OG0000327	ENSEQOG00000011816.1
Andrenidae	Andrena chrysosceles	AMP	OG0000327	ENSEQOG00000012516.1
Andrenidae	Andrena chrysosceles	AMP	OG0001334	ENSEQOG00000010167.1
Andrenidae	Andrena chrysosceles	AMP	OG0009601	ENSEQOG00000009772.1
Andrenidae	Andrena chrysosceles	APHAG	OG0002446	ENSEQOG00000016653.1
Andrenidae	Andrena chrysosceles	APHAG	OG0003831	ENSEQOG00000015790.1
Andrenidae	Andrena chrysosceles	APHAG	OG0003933	ENSEQOG00000016755.1
Andrenidae	Andrena chrysosceles	APHAG	OG0004139	ENSEQOG00000000407.1
Andrenidae	Andrena chrysosceles	APHAG	OG0004673	ENSEQOG00000017364.1
Andrenidae	Andrena chrysosceles	APHAG	OG0004786	ENSEQOG00000000355.1
Andrenidae	Andrena chrysosceles	APHAG	OG0004829	ENSEQOG00000000379.1
Andrenidae	Andrena chrysosceles	APHAG	OG0005197	ENSEQOG00000015068.1
Andrenidae	Andrena chrysosceles	APHAG	OG0005491	ENSEQOG00000003731.1
Andrenidae	Andrena chrysosceles	APHAG	OG0005702	ENSEQOG00000001633.1
Andrenidae	Andrena chrysosceles	APHAG	OG0005834	ENSEQOG00000008015.1
Andrenidae	Andrena chrysosceles	APHAG	OG0005983	ENSEQOG00000010769.1
Andrenidae	Andrena chrysosceles	APHAG	OG0006450	ENSEQOG00000017283.1
Andrenidae	Andrena chrysosceles	APHAG	OG0006519	ENSEQOG00000016431.1
Andrenidae	Andrena chrysosceles	APHAG	OG0006769	ENSEQOG00000009621.1
Andrenidae	Andrena chrysosceles	APHAG	OG0006880	ENSEQOG00000010897.1
Andrenidae	Andrena chrysosceles	ARK	OG0001701	ENSEQOG00000008905.1
Andrenidae	Andrena chrysosceles	CASP	OG0000247	ENSEQOG00000008467.1
Andrenidae	Andrena chrysosceles	CASP	OG0000247	ENSEQOG00000016619.1
Andrenidae	Andrena chrysosceles	CASP	OG0002045	ENSEQOG00000008586.1
Andrenidae	Andrena chrysosceles	CASP	OG0002713	ENSEQOG00000011234.1
Andrenidae	Andrena chrysosceles	CASP	OG0003548	ENSEQOG00000010376.1
Andrenidae	Andrena chrysosceles	CAT	OG0002400	ENSEQOG00000010680.1
Andrenidae	Andrena chrysosceles	CLIP	OG0000100	ENSEQOG00000007535.1
Andrenidae	Andrena chrysosceles	CLIP	OG0000100	ENSEQOG00000009246.1
Andrenidae	Andrena chrysosceles	CLIP	OG0000489	ENSEQOG00000001339.1
Andrenidae	Andrena chrysosceles	CLIP	OG0000489	ENSEQOG00000004320.1
Andrenidae	Andrena chrysosceles	CLIP	OG0000857	ENSEQOG00000009924.1
Andrenidae	Andrena chrysosceles	CLIP	OG0000857	ENSEQOG00000010016.1
Andrenidae	Andrena chrysosceles	CLIP	OG0000857	ENSEQOG00000012198.1
Andrenidae	Andrena chrysosceles	CLIP	OG0001104	ENSEQOG00000001528.1
Andrenidae	Andrena chrysosceles	CLIP	OG0001286	ENSEQOG00000005227.1
Andrenidae	Andrena chrysosceles	CLIP	OG0003918	ENSEQOG00000002766.1
Andrenidae	Andrena chrysosceles	CLIP	OG0003952	ENSEQOG00000000703.1
Andrenidae	Andrena chrysosceles	CLIP	OG0004548	ENSEQOG00000010690.1
Andrenidae	Andrena chrysosceles	CLIP	OG0005173	ENSEQOG00000011533.1
Andrenidae	Andrena chrysosceles	CLIP	OG0005417	ENSEQOG00000016709.1
Andrenidae	Andrena chrysosceles	CLIP	OG0005447	ENSEQOG00000003909.1
Andrenidae	Andrena chrysosceles	CLIP	OG0005762	ENSEQOG00000008627.1
Andrenidae	Andrena chrysosceles	CLIP	OG0006813	ENSEQOG00000007016.1
Andrenidae	Andrena chrysosceles	CLIP	OG0006967	ENSEQOG00000008944.1
Andrenidae	Andrena chrysosceles	CLIP	OG0007332	ENSEQOG00000008876.1
Andrenidae	Andrena chrysosceles	CLIP	OG0007742	ENSEQOG00000000530.1
Andrenidae	Andrena chrysosceles	CTL	OG0001740	ENSEQOG00000003230.1
Andrenidae	Andrena chrysosceles	CTL	OG0001823	ENSEQOG00000000746.1
Andrenidae	Andrena chrysosceles	CTL	OG0003176	ENSEQOG00000001958.1
Andrenidae	Andrena chrysosceles	CTL	OG0004881	ENSEQOG00000016854.1
Andrenidae	Andrena chrysosceles	CTL	OG0005639	ENSEQOG00000001125.1
Andrenidae	Andrena chrysosceles	CTL	OG0005791	ENSEQOG00000001549.1
Andrenidae	Andrena chrysosceles	CTL	OG0006335	ENSEQOG00000012986.1
Andrenidae	Andrena chrysosceles	CTL	OG0006524	ENSEQOG00000010250.1
Andrenidae	Andrena chrysosceles	CTL	OG0006792	ENSEQOG00000000515.1
Andrenidae	Andrena chrysosceles	CTL	OG0008136	ENSEQOG00000003217.1
Andrenidae	Andrena chrysosceles	FREP	OG0000388	ENSEQOG00000003628.1
Andrenidae	Andrena chrysosceles	FREP	OG0000388	ENSEQOG00000007330.1
Andrenidae	Andrena chrysosceles	FREP	OG0001750	ENSEQOG00000013408.1
Andrenidae	Andrena chrysosceles	GALE	OG0003190	ENSEQOG00000000374.1
Andrenidae	Andrena chrysosceles	GALE	OG0004011	ENSEQOG00000000544.1
Andrenidae	Andrena chrysosceles	GALE	OG0006683	ENSEQOG00000015898.1
Andrenidae	Andrena chrysosceles	GNBP	OG0000914	ENSEQOG00000002066.1
Andrenidae	Andrena chrysosceles	GNBP	OG0000914	ENSEQOG00000002991.1
Andrenidae	Andrena chrysosceles	GNBP	OG0001694	ENSEQOG00000006925.1
Andrenidae	Andrena chrysosceles	GNBP	OG0001694	ENSEQOG00000009598.1
Andrenidae	Andrena chrysosceles	IAP	OG0000199	ENSEQOG00000000053.1
Andrenidae	Andrena chrysosceles	IAP	OG0000199	ENSEQOG00000002302.1
Andrenidae	Andrena chrysosceles	IAP	OG0003978	ENSEQOG00000017236.1
Andrenidae	Andrena chrysosceles	IAP	OG0004007	ENSEQOG00000009515.1
Andrenidae	Andrena chrysosceles	IGG	OG0000504	ENSEQOG00000008282.1
Andrenidae	Andrena chrysosceles	IGG	OG0000504	ENSEQOG00000009596.1
Andrenidae	Andrena chrysosceles	IGG	OG0000504	ENSEQOG00000009699.1
Andrenidae	Andrena chrysosceles	IGG	OG0000512	ENSEQOG00000005822.1
Andrenidae	Andrena chrysosceles	IGG	OG0000512	ENSEQOG00000009036.1
Andrenidae	Andrena chrysosceles	IMD	OG0000611	ENSEQOG00000015966.1
Andrenidae	Andrena chrysosceles	IMD	OG0000611	ENSEQOG00000016179.1
Andrenidae	Andrena chrysosceles	IMD	OG0003945	ENSEQOG00000015782.1
Andrenidae	Andrena chrysosceles	IMD	OG0005010	ENSEQOG00000000106.1
Andrenidae	Andrena chrysosceles	IMD	OG0006148	ENSEQOG00000009783.1
Andrenidae	Andrena chrysosceles	IMD	OG0006188	ENSEQOG00000009051.1
Andrenidae	Andrena chrysosceles	IMD	OG0006444	ENSEQOG00000010359.1
Andrenidae	Andrena chrysosceles	IMD	OG0008396	ENSEQOG00000016628.1
Andrenidae	Andrena chrysosceles	JAST	OG0002385	ENSEQOG00000000128.1
Andrenidae	Andrena chrysosceles	JAST	OG0002504	ENSEQOG00000008867.1
Andrenidae	Andrena chrysosceles	JAST	OG0002998	ENSEQOG00000000594.1
Andrenidae	Andrena chrysosceles	LYS	OG0007140	ENSEQOG00000014157.1
Andrenidae	Andrena chrysosceles	ML	OG0001994	ENSEQOG00000003705.1
Andrenidae	Andrena chrysosceles	ML	OG0002469	ENSEQOG00000016497.1
Andrenidae	Andrena chrysosceles	ML	OG0008465	ENSEQOG00000012975.1
Andrenidae	Andrena chrysosceles	ML	OG0008732	ENSEQOG00000016677.1
Andrenidae	Andrena chrysosceles	NIM	OG0000346	ENSEQOG00000001119.1
Andrenidae	Andrena chrysosceles	NIM	OG0000346	ENSEQOG00000002749.1
Andrenidae	Andrena chrysosceles	NIM	OG0000346	ENSEQOG00000003369.1
Andrenidae	Andrena chrysosceles	NIM	OG0002945	ENSEQOG00000000913.1
Andrenidae	Andrena chrysosceles	NIM	OG0008120	ENSEQOG00000002884.1
Andrenidae	Andrena chrysosceles	PGRP	OG0000398	ENSEQOG00000007827.1
Andrenidae	Andrena chrysosceles	PGRP	OG0000398	ENSEQOG00000010309.1
Andrenidae	Andrena chrysosceles	PGRP	OG0001034	ENSEQOG00000000329.1
Andrenidae	Andrena chrysosceles	PGRP	OG0001034	ENSEQOG00000005608.1
Andrenidae	Andrena chrysosceles	PGRP	OG0001352	ENSEQOG00000007864.1
Andrenidae	Andrena chrysosceles	PPO	OG0000644	ENSEQOG00000016437.1
Andrenidae	Andrena chrysosceles	PRDX	OG0000204	ENSEQOG00000003177.1
Andrenidae	Andrena chrysosceles	PRDX	OG0000204	ENSEQOG00000014851.1
Andrenidae	Andrena chrysosceles	PRDX	OG0000339	ENSEQOG00000011052.1
Andrenidae	Andrena chrysosceles	PRDX	OG0000339	ENSEQOG00000016086.1
Andrenidae	Andrena chrysosceles	PRDX	OG0001974	ENSEQOG00000007655.1
Andrenidae	Andrena chrysosceles	PRDX	OG0001986	ENSEQOG00000006934.1
Andrenidae	Andrena chrysosceles	PRDX	OG0002022	ENSEQOG00000007431.1
Andrenidae	Andrena chrysosceles	PRDX	OG0004270	ENSEQOG00000003071.1
Andrenidae	Andrena chrysosceles	PRDX	OG0004336	ENSEQOG00000012877.1
Andrenidae	Andrena chrysosceles	PRDX	OG0004664	ENSEQOG00000010495.1
Andrenidae	Andrena chrysosceles	PRDX	OG0005353	ENSEQOG00000003359.1
Andrenidae	Andrena chrysosceles	PRDX	OG0005561	ENSEQOG00000002776.1
Andrenidae	Andrena chrysosceles	PRDX	OG0006684	ENSEQOG00000003267.1
Andrenidae	Andrena chrysosceles	REL	OG0000812	ENSEQOG00000007309.1
Andrenidae	Andrena chrysosceles	REL	OG0003522	ENSEQOG00000008810.1
Andrenidae	Andrena chrysosceles	SCR	OG0000321	ENSEQOG00000010319.1
Andrenidae	Andrena chrysosceles	SCR	OG0000431	ENSEQOG00000006269.1
Andrenidae	Andrena chrysosceles	SCR	OG0000431	ENSEQOG00000007446.1
Andrenidae	Andrena chrysosceles	SCR	OG0000984	ENSEQOG00000006128.1
Andrenidae	Andrena chrysosceles	SCR	OG0000984	ENSEQOG00000006850.1
Andrenidae	Andrena chrysosceles	SCR	OG0001434	ENSEQOG00000011130.1
Andrenidae	Andrena chrysosceles	SCR	OG0002021	ENSEQOG00000006615.1
Andrenidae	Andrena chrysosceles	SCR	OG0002535	ENSEQOG00000000571.1
Andrenidae	Andrena chrysosceles	SCR	OG0002620	ENSEQOG00000013134.1
Andrenidae	Andrena chrysosceles	SCR	OG0003366	ENSEQOG00000014400.1
Andrenidae	Andrena chrysosceles	SCR	OG0003844	ENSEQOG00000002140.1
Andrenidae	Andrena chrysosceles	SCR	OG0004910	ENSEQOG00000012355.1
Andrenidae	Andrena chrysosceles	SCR	OG0006301	ENSEQOG00000008529.1
Andrenidae	Andrena chrysosceles	SCR	OG0006498	ENSEQOG00000008935.1
Andrenidae	Andrena chrysosceles	SCR	OG0007701	ENSEQOG00000009949.1
Andrenidae	Andrena chrysosceles	SOD	OG0000245	ENSEQOG00000011214.1
Andrenidae	Andrena chrysosceles	SOD	OG0000245	ENSEQOG00000011251.1
Andrenidae	Andrena chrysosceles	SOD	OG0000245	ENSEQOG00000013802.1
Andrenidae	Andrena chrysosceles	SPZ	OG0000086	ENSEQOG00000008873.1
Andrenidae	Andrena chrysosceles	SPZ	OG0000086	ENSEQOG00000014634.1
Andrenidae	Andrena chrysosceles	SPZ	OG0000086	ENSEQOG00000017424.1
Andrenidae	Andrena chrysosceles	SPZ	OG0000409	ENSEQOG00000009817.1
Andrenidae	Andrena chrysosceles	SPZ	OG0000409	ENSEQOG00000014515.1
Andrenidae	Andrena chrysosceles	SPZ	OG0002737	ENSEQOG00000010662.1
Andrenidae	Andrena chrysosceles	SPZ	OG0004631	ENSEQOG00000016622.1
Andrenidae	Andrena chrysosceles	SPZ	OG0007508	ENSEQOG00000013193.1
Andrenidae	Andrena chrysosceles	SRPN	OG0000122	ENSEQOG00000001225.1
Andrenidae	Andrena chrysosceles	SRPN	OG0000122	ENSEQOG00000001854.1
Andrenidae	Andrena chrysosceles	SRPN	OG0000122	ENSEQOG00000002478.1
Andrenidae	Andrena chrysosceles	SRPN	OG0000122	ENSEQOG00000003720.1
Andrenidae	Andrena chrysosceles	SRPN	OG0000122	ENSEQOG00000016279.1
Andrenidae	Andrena chrysosceles	SRPN	OG0001063	ENSEQOG00000000394.1
Andrenidae	Andrena chrysosceles	SRPN	OG0001063	ENSEQOG00000001694.1
Andrenidae	Andrena chrysosceles	SRPN	OG0001356	ENSEQOG00000001717.1
Andrenidae	Andrena chrysosceles	SRPN	OG0001356	ENSEQOG00000001981.1
Andrenidae	Andrena chrysosceles	SRPN	OG0001590	ENSEQOG00000000290.1
Andrenidae	Andrena chrysosceles	SRPN	OG0001590	ENSEQOG00000006263.1
Andrenidae	Andrena chrysosceles	SRPN	OG0001714	ENSEQOG00000017235.1
Andrenidae	Andrena chrysosceles	SRPN	OG0004321	ENSEQOG00000012844.1
Andrenidae	Andrena chrysosceles	SRPN	OG0007947	ENSEQOG00000014611.1
Andrenidae	Andrena chrysosceles	SRRP	OG0000178	ENSEQOG00000001602.1
Andrenidae	Andrena chrysosceles	SRRP	OG0000178	ENSEQOG00000002568.1
Andrenidae	Andrena chrysosceles	SRRP	OG0000190	ENSEQOG00000007922.1
Andrenidae	Andrena chrysosceles	SRRP	OG0000757	ENSEQOG00000017302.1
Andrenidae	Andrena chrysosceles	SRRP	OG0000905	ENSEQOG00000003239.1
Andrenidae	Andrena chrysosceles	SRRP	OG0000905	ENSEQOG00000011385.1
Andrenidae	Andrena chrysosceles	SRRP	OG0001417	ENSEQOG00000014635.1
Andrenidae	Andrena chrysosceles	SRRP	OG0001672	ENSEQOG00000000217.1
Andrenidae	Andrena chrysosceles	SRRP	OG0001984	ENSEQOG00000009431.1
Andrenidae	Andrena chrysosceles	SRRP	OG0001998	ENSEQOG00000012293.1
Andrenidae	Andrena chrysosceles	SRRP	OG0002044	ENSEQOG00000003592.1
Andrenidae	Andrena chrysosceles	SRRP	OG0002165	ENSEQOG00000017086.1
Andrenidae	Andrena chrysosceles	SRRP	OG0002220	ENSEQOG00000003409.1
Andrenidae	Andrena chrysosceles	SRRP	OG0002344	ENSEQOG00000014965.1
Andrenidae	Andrena chrysosceles	SRRP	OG0002370	ENSEQOG00000010641.1
Andrenidae	Andrena chrysosceles	SRRP	OG0002466	ENSEQOG00000010340.1
Andrenidae	Andrena chrysosceles	SRRP	OG0002592	ENSEQOG00000009414.1
Andrenidae	Andrena chrysosceles	SRRP	OG0003358	ENSEQOG00000017025.1
Andrenidae	Andrena chrysosceles	SRRP	OG0003433	ENSEQOG00000014715.1
Andrenidae	Andrena chrysosceles	SRRP	OG0003566	ENSEQOG00000010400.1
Andrenidae	Andrena chrysosceles	SRRP	OG0003841	ENSEQOG00000008020.1
Andrenidae	Andrena chrysosceles	SRRP	OG0004198	ENSEQOG00000003390.1
Andrenidae	Andrena chrysosceles	SRRP	OG0004356	ENSEQOG00000014304.1
Andrenidae	Andrena chrysosceles	SRRP	OG0004686	ENSEQOG00000016781.1
Andrenidae	Andrena chrysosceles	SRRP	OG0004768	ENSEQOG00000012002.1
Andrenidae	Andrena chrysosceles	SRRP	OG0005922	ENSEQOG00000009495.1
Andrenidae	Andrena chrysosceles	SRRP	OG0006338	ENSEQOG00000015920.1
Andrenidae	Andrena chrysosceles	SRRP	OG0007357	ENSEQOG00000009472.1
Andrenidae	Andrena chrysosceles	TEP	OG0002197	ENSEQOG00000001058.1
Andrenidae	Andrena chrysosceles	TEP	OG0003051	ENSEQOG00000001417.1
Andrenidae	Andrena chrysosceles	TEP	OG0004656	ENSEQOG00000012079.1
Andrenidae	Andrena chrysosceles	TOLL	OG0001398	ENSEQOG00000009535.1
Andrenidae	Andrena chrysosceles	TOLL	OG0001682	ENSEQOG00000013757.1
Andrenidae	Andrena chrysosceles	TOLL	OG0002313	ENSEQOG00000010811.1
Andrenidae	Andrena chrysosceles	TOLL	OG0003414	ENSEQOG00000014550.1
Andrenidae	Andrena chrysosceles	TOLL	OG0003660	ENSEQOG00000014201.1
Andrenidae	Andrena chrysosceles	TOLL	OG0004590	ENSEQOG00000012422.1
Andrenidae	Andrena chrysosceles	TOLL	OG0004619	ENSEQOG00000016635.1
Andrenidae	Andrena chrysosceles	TOLL	OG0007017	ENSEQOG00000007451.1
Andrenidae	Andrena chrysosceles	TOLL	OG0007609	ENSEQOG00000012055.1
Andrenidae	Andrena dorsata	AMP	OG0000327	ENSADOG00000011238.1
Andrenidae	Andrena dorsata	AMP	OG0000327	ENSADOG00000012062.1
Andrenidae	Andrena dorsata	AMP	OG0001334	ENSADOG00000007419.1
Andrenidae	Andrena dorsata	AMP	OG0009601	ENSADOG00000008427.1
Andrenidae	Andrena dorsata	APHAG	OG0002446	ENSADOG00000010528.1
Andrenidae	Andrena dorsata	APHAG	OG0003831	ENSADOG00000008447.1
Andrenidae	Andrena dorsata	APHAG	OG0003933	ENSADOG00000008402.1
Andrenidae	Andrena dorsata	APHAG	OG0004139	ENSADOG00000003166.1
Andrenidae	Andrena dorsata	APHAG	OG0004673	ENSADOG00000013014.1
Andrenidae	Andrena dorsata	APHAG	OG0004786	ENSADOG00000010857.1
Andrenidae	Andrena dorsata	APHAG	OG0004829	ENSADOG00000013038.1
Andrenidae	Andrena dorsata	APHAG	OG0005197	ENSADOG00000011300.1
Andrenidae	Andrena dorsata	APHAG	OG0005491	ENSADOG00000007886.1
Andrenidae	Andrena dorsata	APHAG	OG0005702	ENSADOG00000000646.1
Andrenidae	Andrena dorsata	APHAG	OG0005834	ENSADOG00000002177.1
Andrenidae	Andrena dorsata	APHAG	OG0005983	ENSADOG00000000821.1
Andrenidae	Andrena dorsata	APHAG	OG0006450	ENSADOG00000006344.1
Andrenidae	Andrena dorsata	APHAG	OG0006519	ENSADOG00000009869.1
Andrenidae	Andrena dorsata	APHAG	OG0006769	ENSADOG00000003622.1
Andrenidae	Andrena dorsata	APHAG	OG0006880	ENSADOG00000003808.1
Andrenidae	Andrena dorsata	ARK	OG0001701	ENSADOG00000007744.1
Andrenidae	Andrena dorsata	CASP	OG0000247	ENSADOG00000007215.1
Andrenidae	Andrena dorsata	CASP	OG0000247	ENSADOG00000012965.1
Andrenidae	Andrena dorsata	CASP	OG0002045	ENSADOG00000005455.1
Andrenidae	Andrena dorsata	CASP	OG0002713	ENSADOG00000006534.1
Andrenidae	Andrena dorsata	CASP	OG0003548	ENSADOG00000007130.1
Andrenidae	Andrena dorsata	CAT	OG0002400	ENSADOG00000006033.1
Andrenidae	Andrena dorsata	CLIP	OG0000100	ENSADOG00000007615.1
Andrenidae	Andrena dorsata	CLIP	OG0000100	ENSADOG00000011101.1
Andrenidae	Andrena dorsata	CLIP	OG0000489	ENSADOG00000005759.1
Andrenidae	Andrena dorsata	CLIP	OG0000857	ENSADOG00000008490.1
Andrenidae	Andrena dorsata	CLIP	OG0001104	ENSADOG00000003367.1
Andrenidae	Andrena dorsata	CLIP	OG0001286	ENSADOG00000000778.1
Andrenidae	Andrena dorsata	CLIP	OG0001530	ENSADOG00000001177.1
Andrenidae	Andrena dorsata	CLIP	OG0003918	ENSADOG00000002406.1
Andrenidae	Andrena dorsata	CLIP	OG0003952	ENSADOG00000003464.1
Andrenidae	Andrena dorsata	CLIP	OG0004548	ENSADOG00000011470.1
Andrenidae	Andrena dorsata	CLIP	OG0005173	ENSADOG00000012192.1
Andrenidae	Andrena dorsata	CLIP	OG0005417	ENSADOG00000007696.1
Andrenidae	Andrena dorsata	CLIP	OG0005447	ENSADOG00000002395.1
Andrenidae	Andrena dorsata	CLIP	OG0005762	ENSADOG00000000884.1
Andrenidae	Andrena dorsata	CLIP	OG0006813	ENSADOG00000003905.1
Andrenidae	Andrena dorsata	CLIP	OG0006967	ENSADOG00000007463.1
Andrenidae	Andrena dorsata	CLIP	OG0007332	ENSADOG00000002656.1
Andrenidae	Andrena dorsata	CLIP	OG0007742	ENSADOG00000001719.1
Andrenidae	Andrena dorsata	CTL	OG0001740	ENSADOG00000012474.1
Andrenidae	Andrena dorsata	CTL	OG0001823	ENSADOG00000001228.1
Andrenidae	Andrena dorsata	CTL	OG0003176	ENSADOG00000001458.1
Andrenidae	Andrena dorsata	CTL	OG0004881	ENSADOG00000011654.1
Andrenidae	Andrena dorsata	CTL	OG0005639	ENSADOG00000007251.1
Andrenidae	Andrena dorsata	CTL	OG0005791	ENSADOG00000000930.1
Andrenidae	Andrena dorsata	CTL	OG0006335	ENSADOG00000007176.1
Andrenidae	Andrena dorsata	CTL	OG0006524	ENSADOG00000010406.1
Andrenidae	Andrena dorsata	CTL	OG0006792	ENSADOG00000000757.1
Andrenidae	Andrena dorsata	CTL	OG0008136	ENSADOG00000002608.1
Andrenidae	Andrena dorsata	FREP	OG0000388	ENSADOG00000000114.1
Andrenidae	Andrena dorsata	FREP	OG0001750	ENSADOG00000006186.1
Andrenidae	Andrena dorsata	GALE	OG0003190	ENSADOG00000012328.1
Andrenidae	Andrena dorsata	GALE	OG0004011	ENSADOG00000001171.1
Andrenidae	Andrena dorsata	GALE	OG0006683	ENSADOG00000012332.1
Andrenidae	Andrena dorsata	GNBP	OG0000914	ENSADOG00000006094.1
Andrenidae	Andrena dorsata	GNBP	OG0000914	ENSADOG00000008049.1
Andrenidae	Andrena dorsata	GNBP	OG0001694	ENSADOG00000007113.1
Andrenidae	Andrena dorsata	GNBP	OG0001694	ENSADOG00000007987.1
Andrenidae	Andrena dorsata	IAP	OG0000199	ENSADOG00000003560.1
Andrenidae	Andrena dorsata	IAP	OG0000199	ENSADOG00000011814.1
Andrenidae	Andrena dorsata	IAP	OG0003978	ENSADOG00000006030.1
Andrenidae	Andrena dorsata	IAP	OG0004007	ENSADOG00000007552.1
Andrenidae	Andrena dorsata	IAP	OG0008676	ENSADOG00000012498.1
Andrenidae	Andrena dorsata	IGG	OG0000504	ENSADOG00000012995.1
Andrenidae	Andrena dorsata	IGG	OG0000512	ENSADOG00000005106.1
Andrenidae	Andrena dorsata	IMD	OG0000611	ENSADOG00000008915.1
Andrenidae	Andrena dorsata	IMD	OG0000611	ENSADOG00000011080.1
Andrenidae	Andrena dorsata	IMD	OG0003945	ENSADOG00000007868.1
Andrenidae	Andrena dorsata	IMD	OG0005010	ENSADOG00000011958.1
Andrenidae	Andrena dorsata	IMD	OG0006148	ENSADOG00000003047.1
Andrenidae	Andrena dorsata	IMD	OG0006188	ENSADOG00000002958.1
Andrenidae	Andrena dorsata	IMD	OG0006444	ENSADOG00000002599.1
Andrenidae	Andrena dorsata	IMD	OG0008396	ENSADOG00000006640.1
Andrenidae	Andrena dorsata	JAST	OG0002385	ENSADOG00000012704.1
Andrenidae	Andrena dorsata	JAST	OG0002504	ENSADOG00000007315.1
Andrenidae	Andrena dorsata	JAST	OG0002998	ENSADOG00000002986.1
Andrenidae	Andrena dorsata	LYS	OG0007140	ENSADOG00000006450.1
Andrenidae	Andrena dorsata	ML	OG0001994	ENSADOG00000008660.1
Andrenidae	Andrena dorsata	ML	OG0002469	ENSADOG00000008118.1
Andrenidae	Andrena dorsata	NIM	OG0000346	ENSADOG00000000586.1
Andrenidae	Andrena dorsata	NIM	OG0000346	ENSADOG00000001240.1
Andrenidae	Andrena dorsata	NIM	OG0002945	ENSADOG00000000062.1
Andrenidae	Andrena dorsata	NIM	OG0008120	ENSADOG00000000923.1
Andrenidae	Andrena dorsata	PGRP	OG0000398	ENSADOG00000005747.1
Andrenidae	Andrena dorsata	PGRP	OG0001034	ENSADOG00000003819.1
Andrenidae	Andrena dorsata	PGRP	OG0001034	ENSADOG00000005384.1
Andrenidae	Andrena dorsata	PGRP	OG0001352	ENSADOG00000006797.1
Andrenidae	Andrena dorsata	PPO	OG0000644	ENSADOG00000000823.1
Andrenidae	Andrena dorsata	PPO	OG0000644	ENSADOG00000001211.1
Andrenidae	Andrena dorsata	PPO	OG0000644	ENSADOG00000001954.1
Andrenidae	Andrena dorsata	PPO	OG0000644	ENSADOG00000002422.1
Andrenidae	Andrena dorsata	PPO	OG0000644	ENSADOG00000002547.1
Andrenidae	Andrena dorsata	PRDX	OG0000204	ENSADOG00000007823.1
Andrenidae	Andrena dorsata	PRDX	OG0000204	ENSADOG00000011780.1
Andrenidae	Andrena dorsata	PRDX	OG0000339	ENSADOG00000004096.1
Andrenidae	Andrena dorsata	PRDX	OG0001974	ENSADOG00000000920.1
Andrenidae	Andrena dorsata	PRDX	OG0001974	ENSADOG00000007274.1
Andrenidae	Andrena dorsata	PRDX	OG0001986	ENSADOG00000003302.1
Andrenidae	Andrena dorsata	PRDX	OG0002022	ENSADOG00000010718.1
Andrenidae	Andrena dorsata	PRDX	OG0004270	ENSADOG00000003898.1
Andrenidae	Andrena dorsata	PRDX	OG0004336	ENSADOG00000002969.1
Andrenidae	Andrena dorsata	PRDX	OG0004664	ENSADOG00000011449.1
Andrenidae	Andrena dorsata	PRDX	OG0005353	ENSADOG00000002038.1
Andrenidae	Andrena dorsata	PRDX	OG0005561	ENSADOG00000005907.1
Andrenidae	Andrena dorsata	PRDX	OG0006684	ENSADOG00000002870.1
Andrenidae	Andrena dorsata	REL	OG0000812	ENSADOG00000007490.1
Andrenidae	Andrena dorsata	REL	OG0003522	ENSADOG00000010031.1
Andrenidae	Andrena dorsata	SCR	OG0000321	ENSADOG00000005185.1
Andrenidae	Andrena dorsata	SCR	OG0000321	ENSADOG00000007888.1
Andrenidae	Andrena dorsata	SCR	OG0000431	ENSADOG00000005526.1
Andrenidae	Andrena dorsata	SCR	OG0000984	ENSADOG00000007721.1
Andrenidae	Andrena dorsata	SCR	OG0001434	ENSADOG00000011368.1
Andrenidae	Andrena dorsata	SCR	OG0002021	ENSADOG00000005794.1
Andrenidae	Andrena dorsata	SCR	OG0002535	ENSADOG00000010728.1
Andrenidae	Andrena dorsata	SCR	OG0002620	ENSADOG00000011757.1
Andrenidae	Andrena dorsata	SCR	OG0003366	ENSADOG00000012389.1
Andrenidae	Andrena dorsata	SCR	OG0003844	ENSADOG00000002971.1
Andrenidae	Andrena dorsata	SCR	OG0004910	ENSADOG00000012568.1
Andrenidae	Andrena dorsata	SCR	OG0006301	ENSADOG00000004788.1
Andrenidae	Andrena dorsata	SCR	OG0006498	ENSADOG00000008871.1
Andrenidae	Andrena dorsata	SCR	OG0007701	ENSADOG00000003988.1
Andrenidae	Andrena dorsata	SOD	OG0000245	ENSADOG00000007329.1
Andrenidae	Andrena dorsata	SOD	OG0000245	ENSADOG00000007574.1
Andrenidae	Andrena dorsata	SOD	OG0000245	ENSADOG00000008083.1
Andrenidae	Andrena dorsata	SPZ	OG0000086	ENSADOG00000003368.1
Andrenidae	Andrena dorsata	SPZ	OG0000086	ENSADOG00000011074.1
Andrenidae	Andrena dorsata	SPZ	OG0000086	ENSADOG00000011291.1
Andrenidae	Andrena dorsata	SPZ	OG0000409	ENSADOG00000005249.1
Andrenidae	Andrena dorsata	SPZ	OG0000409	ENSADOG00000011071.1
Andrenidae	Andrena dorsata	SPZ	OG0002737	ENSADOG00000011218.1
Andrenidae	Andrena dorsata	SPZ	OG0004631	ENSADOG00000012045.1
Andrenidae	Andrena dorsata	SPZ	OG0007508	ENSADOG00000010055.1
Andrenidae	Andrena dorsata	SRPN	OG0000122	ENSADOG00000001442.1
Andrenidae	Andrena dorsata	SRPN	OG0000122	ENSADOG00000001849.1
Andrenidae	Andrena dorsata	SRPN	OG0000122	ENSADOG00000002019.1
Andrenidae	Andrena dorsata	SRPN	OG0000122	ENSADOG00000002255.1
Andrenidae	Andrena dorsata	SRPN	OG0000122	ENSADOG00000002439.1
Andrenidae	Andrena dorsata	SRPN	OG0000122	ENSADOG00000003275.1
Andrenidae	Andrena dorsata	SRPN	OG0000122	ENSADOG00000010425.1
Andrenidae	Andrena dorsata	SRPN	OG0000122	ENSADOG00000011816.1
Andrenidae	Andrena dorsata	SRPN	OG0000122	ENSADOG00000012723.1
Andrenidae	Andrena dorsata	SRPN	OG0001063	ENSADOG00000003087.1
Andrenidae	Andrena dorsata	SRPN	OG0001356	ENSADOG00000002874.1
Andrenidae	Andrena dorsata	SRPN	OG0001356	ENSADOG00000002983.1
Andrenidae	Andrena dorsata	SRPN	OG0001590	ENSADOG00000010321.1
Andrenidae	Andrena dorsata	SRPN	OG0001590	ENSADOG00000010692.1
Andrenidae	Andrena dorsata	SRPN	OG0001714	ENSADOG00000011385.1
Andrenidae	Andrena dorsata	SRPN	OG0004321	ENSADOG00000012800.1
Andrenidae	Andrena dorsata	SRPN	OG0007947	ENSADOG00000001886.1
Andrenidae	Andrena dorsata	SRRP	OG0000178	ENSADOG00000012470.1
Andrenidae	Andrena dorsata	SRRP	OG0000190	ENSADOG00000001151.1
Andrenidae	Andrena dorsata	SRRP	OG0000190	ENSADOG00000002138.1
Andrenidae	Andrena dorsata	SRRP	OG0000190	ENSADOG00000004757.1
Andrenidae	Andrena dorsata	SRRP	OG0000757	ENSADOG00000012082.1
Andrenidae	Andrena dorsata	SRRP	OG0000905	ENSADOG00000007907.1
Andrenidae	Andrena dorsata	SRRP	OG0000905	ENSADOG00000010604.1
Andrenidae	Andrena dorsata	SRRP	OG0000905	ENSADOG00000012532.1
Andrenidae	Andrena dorsata	SRRP	OG0000905	ENSADOG00000012646.1
Andrenidae	Andrena dorsata	SRRP	OG0001417	ENSADOG00000006870.1
Andrenidae	Andrena dorsata	SRRP	OG0001672	ENSADOG00000011277.1
Andrenidae	Andrena dorsata	SRRP	OG0001984	ENSADOG00000001620.1
Andrenidae	Andrena dorsata	SRRP	OG0001998	ENSADOG00000009021.1
Andrenidae	Andrena dorsata	SRRP	OG0002044	ENSADOG00000013092.1
Andrenidae	Andrena dorsata	SRRP	OG0002165	ENSADOG00000005028.1
Andrenidae	Andrena dorsata	SRRP	OG0002220	ENSADOG00000000822.1
Andrenidae	Andrena dorsata	SRRP	OG0002344	ENSADOG00000007892.1
Andrenidae	Andrena dorsata	SRRP	OG0002370	ENSADOG00000006966.1
Andrenidae	Andrena dorsata	SRRP	OG0002466	ENSADOG00000008428.1
Andrenidae	Andrena dorsata	SRRP	OG0002592	ENSADOG00000003778.1
Andrenidae	Andrena dorsata	SRRP	OG0003358	ENSADOG00000012093.1
Andrenidae	Andrena dorsata	SRRP	OG0003433	ENSADOG00000011637.1
Andrenidae	Andrena dorsata	SRRP	OG0003566	ENSADOG00000009494.1
Andrenidae	Andrena dorsata	SRRP	OG0003841	ENSADOG00000003839.1
Andrenidae	Andrena dorsata	SRRP	OG0004198	ENSADOG00000000694.1
Andrenidae	Andrena dorsata	SRRP	OG0004356	ENSADOG00000002371.1
Andrenidae	Andrena dorsata	SRRP	OG0004686	ENSADOG00000012747.1
Andrenidae	Andrena dorsata	SRRP	OG0004768	ENSADOG00000005997.1
Andrenidae	Andrena dorsata	SRRP	OG0005922	ENSADOG00000005603.1
Andrenidae	Andrena dorsata	SRRP	OG0006338	ENSADOG00000011990.1
Andrenidae	Andrena dorsata	SRRP	OG0007357	ENSADOG00000012379.1
Andrenidae	Andrena dorsata	TEP	OG0002197	ENSADOG00000007103.1
Andrenidae	Andrena dorsata	TEP	OG0003051	ENSADOG00000005533.1
Andrenidae	Andrena dorsata	TEP	OG0004656	ENSADOG00000011363.1
Andrenidae	Andrena dorsata	TOLL	OG0001398	ENSADOG00000005426.1
Andrenidae	Andrena dorsata	TOLL	OG0001682	ENSADOG00000003912.1
Andrenidae	Andrena dorsata	TOLL	OG0002313	ENSADOG00000009739.1
Andrenidae	Andrena dorsata	TOLL	OG0003414	ENSADOG00000004335.1
Andrenidae	Andrena dorsata	TOLL	OG0003660	ENSADOG00000003938.1
Andrenidae	Andrena dorsata	TOLL	OG0004590	ENSADOG00000002930.1
Andrenidae	Andrena dorsata	TOLL	OG0004619	ENSADOG00000012175.1
Andrenidae	Andrena dorsata	TOLL	OG0007017	ENSADOG00000003467.1
Andrenidae	Andrena dorsata	TOLL	OG0007609	ENSADOG00000007405.1
Andrenidae	Andrena fulva	AMP	OG0000327	ENSAFVG00005000409.1
Andrenidae	Andrena fulva	AMP	OG0000327	ENSAFVG00005003856.1
Andrenidae	Andrena fulva	AMP	OG0000327	ENSAFVG00005004563.1
Andrenidae	Andrena fulva	AMP	OG0001334	ENSAFVG00005004929.1
Andrenidae	Andrena fulva	AMP	OG0001334	ENSAFVG00005005227.1
Andrenidae	Andrena fulva	AMP	OG0001334	ENSAFVG00005007550.1
Andrenidae	Andrena fulva	AMP	OG0001334	ENSAFVG00005008423.1
Andrenidae	Andrena fulva	AMP	OG0009601	ENSAFVG00005000533.1
Andrenidae	Andrena fulva	AMP	OG0009601	ENSAFVG00005004052.1
Andrenidae	Andrena fulva	APHAG	OG0002446	ENSAFVG00005002105.1
Andrenidae	Andrena fulva	APHAG	OG0003831	ENSAFVG00005004554.1
Andrenidae	Andrena fulva	APHAG	OG0003933	ENSAFVG00005007249.1
Andrenidae	Andrena fulva	APHAG	OG0004139	ENSAFVG00005003952.1
Andrenidae	Andrena fulva	APHAG	OG0004673	ENSAFVG00005001560.1
Andrenidae	Andrena fulva	APHAG	OG0004786	ENSAFVG00005000337.1
Andrenidae	Andrena fulva	APHAG	OG0004829	ENSAFVG00005002094.1
Andrenidae	Andrena fulva	APHAG	OG0005197	ENSAFVG00005001887.1
Andrenidae	Andrena fulva	APHAG	OG0005491	ENSAFVG00005007682.1
Andrenidae	Andrena fulva	APHAG	OG0005702	ENSAFVG00005001720.1
Andrenidae	Andrena fulva	APHAG	OG0005834	ENSAFVG00005012925.1
Andrenidae	Andrena fulva	APHAG	OG0005983	ENSAFVG00005010340.1
Andrenidae	Andrena fulva	APHAG	OG0006450	ENSAFVG00005001409.1
Andrenidae	Andrena fulva	APHAG	OG0006519	ENSAFVG00005004118.1
Andrenidae	Andrena fulva	APHAG	OG0006769	ENSAFVG00005013817.1
Andrenidae	Andrena fulva	APHAG	OG0006880	ENSAFVG00005013077.1
Andrenidae	Andrena fulva	ARK	OG0001701	ENSAFVG00005011192.1
Andrenidae	Andrena fulva	CASP	OG0000247	ENSAFVG00005000032.1
Andrenidae	Andrena fulva	CASP	OG0000247	ENSAFVG00005004468.1
Andrenidae	Andrena fulva	CASP	OG0002045	ENSAFVG00005002908.1
Andrenidae	Andrena fulva	CASP	OG0002713	ENSAFVG00005012936.1
Andrenidae	Andrena fulva	CASP	OG0003548	ENSAFVG00005007999.1
Andrenidae	Andrena fulva	CAT	OG0002400	ENSAFVG00005009095.1
Andrenidae	Andrena fulva	CLIP	OG0000100	ENSAFVG00005011786.1
Andrenidae	Andrena fulva	CLIP	OG0000100	ENSAFVG00005014615.1
Andrenidae	Andrena fulva	CLIP	OG0000489	ENSAFVG00005004220.1
Andrenidae	Andrena fulva	CLIP	OG0000857	ENSAFVG00005014485.1
Andrenidae	Andrena fulva	CLIP	OG0000857	ENSAFVG00005015226.1
Andrenidae	Andrena fulva	CLIP	OG0001104	ENSAFVG00005010992.1
Andrenidae	Andrena fulva	CLIP	OG0001286	ENSAFVG00005010501.1
Andrenidae	Andrena fulva	CLIP	OG0003952	ENSAFVG00005009709.1
Andrenidae	Andrena fulva	CLIP	OG0003952	ENSAFVG00005013672.1
Andrenidae	Andrena fulva	CLIP	OG0004548	ENSAFVG00005011449.1
Andrenidae	Andrena fulva	CLIP	OG0005173	ENSAFVG00005011415.1
Andrenidae	Andrena fulva	CLIP	OG0005417	ENSAFVG00005005114.1
Andrenidae	Andrena fulva	CLIP	OG0005447	ENSAFVG00005008739.1
Andrenidae	Andrena fulva	CLIP	OG0005762	ENSAFVG00005013158.1
Andrenidae	Andrena fulva	CLIP	OG0006813	ENSAFVG00005011219.1
Andrenidae	Andrena fulva	CLIP	OG0006967	ENSAFVG00005010473.1
Andrenidae	Andrena fulva	CLIP	OG0007332	ENSAFVG00005013513.1
Andrenidae	Andrena fulva	CLIP	OG0007742	ENSAFVG00005011144.1
Andrenidae	Andrena fulva	CTL	OG0001740	ENSAFVG00005002507.1
Andrenidae	Andrena fulva	CTL	OG0001823	ENSAFVG00005006103.1
Andrenidae	Andrena fulva	CTL	OG0003176	ENSAFVG00005008291.1
Andrenidae	Andrena fulva	CTL	OG0004881	ENSAFVG00005001036.1
Andrenidae	Andrena fulva	CTL	OG0005639	ENSAFVG00005005986.1
Andrenidae	Andrena fulva	CTL	OG0005791	ENSAFVG00005006214.1
Andrenidae	Andrena fulva	CTL	OG0006335	ENSAFVG00005004945.1
Andrenidae	Andrena fulva	CTL	OG0006524	ENSAFVG00005000270.1
Andrenidae	Andrena fulva	CTL	OG0006792	ENSAFVG00005001591.1
Andrenidae	Andrena fulva	CTL	OG0008136	ENSAFVG00005010329.1
Andrenidae	Andrena fulva	FREP	OG0000388	ENSAFVG00005005696.1
Andrenidae	Andrena fulva	FREP	OG0000388	ENSAFVG00005006255.1
Andrenidae	Andrena fulva	FREP	OG0001750	ENSAFVG00005005878.1
Andrenidae	Andrena fulva	GALE	OG0003190	ENSAFVG00005006936.1
Andrenidae	Andrena fulva	GALE	OG0004011	ENSAFVG00005006864.1
Andrenidae	Andrena fulva	GALE	OG0006683	ENSAFVG00005008185.1
Andrenidae	Andrena fulva	GNBP	OG0000914	ENSAFVG00005006332.1
Andrenidae	Andrena fulva	GNBP	OG0001694	ENSAFVG00005013281.1
Andrenidae	Andrena fulva	GNBP	OG0001694	ENSAFVG00005015224.1
Andrenidae	Andrena fulva	IAP	OG0000199	ENSAFVG00005003263.1
Andrenidae	Andrena fulva	IAP	OG0000199	ENSAFVG00005003610.1
Andrenidae	Andrena fulva	IAP	OG0003978	ENSAFVG00005009281.1
Andrenidae	Andrena fulva	IAP	OG0004007	ENSAFVG00005015130.1
Andrenidae	Andrena fulva	IGG	OG0000504	ENSAFVG00005010533.1
Andrenidae	Andrena fulva	IGG	OG0000504	ENSAFVG00005013249.1
Andrenidae	Andrena fulva	IGG	OG0000512	ENSAFVG00005009656.1
Andrenidae	Andrena fulva	IGG	OG0000512	ENSAFVG00005009965.1
Andrenidae	Andrena fulva	IMD	OG0000611	ENSAFVG00005007726.1
Andrenidae	Andrena fulva	IMD	OG0003945	ENSAFVG00005005664.1
Andrenidae	Andrena fulva	IMD	OG0005010	ENSAFVG00005000313.1
Andrenidae	Andrena fulva	IMD	OG0006148	ENSAFVG00005009082.1
Andrenidae	Andrena fulva	IMD	OG0006188	ENSAFVG00005009660.1
Andrenidae	Andrena fulva	IMD	OG0006444	ENSAFVG00005014885.1
Andrenidae	Andrena fulva	IMD	OG0006444	ENSAFVG00005015405.1
Andrenidae	Andrena fulva	IMD	OG0008396	ENSAFVG00005006334.1
Andrenidae	Andrena fulva	JAST	OG0002385	ENSAFVG00005003064.1
Andrenidae	Andrena fulva	JAST	OG0002504	ENSAFVG00005008264.1
Andrenidae	Andrena fulva	JAST	OG0002504	ENSAFVG00005008341.1
Andrenidae	Andrena fulva	JAST	OG0002998	ENSAFVG00005009541.1
Andrenidae	Andrena fulva	LYS	OG0007140	ENSAFVG00005009845.1
Andrenidae	Andrena fulva	ML	OG0001994	ENSAFVG00005008646.1
Andrenidae	Andrena fulva	ML	OG0002469	ENSAFVG00005006757.1
Andrenidae	Andrena fulva	ML	OG0008465	ENSAFVG00005011090.1
Andrenidae	Andrena fulva	ML	OG0008465	ENSAFVG00005011432.1
Andrenidae	Andrena fulva	ML	OG0008732	ENSAFVG00005006974.1
Andrenidae	Andrena fulva	NIM	OG0000346	ENSAFVG00005009031.1
Andrenidae	Andrena fulva	NIM	OG0000346	ENSAFVG00005010956.1
Andrenidae	Andrena fulva	NIM	OG0002945	ENSAFVG00005010819.1
Andrenidae	Andrena fulva	NIM	OG0008120	ENSAFVG00005013115.1
Andrenidae	Andrena fulva	PGRP	OG0000398	ENSAFVG00005013125.1
Andrenidae	Andrena fulva	PGRP	OG0001034	ENSAFVG00005008370.1
Andrenidae	Andrena fulva	PGRP	OG0001352	ENSAFVG00005004562.1
Andrenidae	Andrena fulva	PGRP	OG0001352	ENSAFVG00005005492.1
Andrenidae	Andrena fulva	PGRP	OG0001352	ENSAFVG00005006954.1
Andrenidae	Andrena fulva	PGRP	OG0001352	ENSAFVG00005008740.1
Andrenidae	Andrena fulva	PPO	OG0000644	ENSAFVG00005004331.1
Andrenidae	Andrena fulva	PPO	OG0000644	ENSAFVG00005009687.1
Andrenidae	Andrena fulva	PRDX	OG0000204	ENSAFVG00005002159.1
Andrenidae	Andrena fulva	PRDX	OG0000204	ENSAFVG00005007998.1
Andrenidae	Andrena fulva	PRDX	OG0000204	ENSAFVG00005008382.1
Andrenidae	Andrena fulva	PRDX	OG0000339	ENSAFVG00005014276.1
Andrenidae	Andrena fulva	PRDX	OG0000339	ENSAFVG00005015477.1
Andrenidae	Andrena fulva	PRDX	OG0001974	ENSAFVG00005007862.1
Andrenidae	Andrena fulva	PRDX	OG0001986	ENSAFVG00005014910.1
Andrenidae	Andrena fulva	PRDX	OG0002022	ENSAFVG00005011387.1
Andrenidae	Andrena fulva	PRDX	OG0004270	ENSAFVG00005009003.1
Andrenidae	Andrena fulva	PRDX	OG0004336	ENSAFVG00005012330.1
Andrenidae	Andrena fulva	PRDX	OG0004664	ENSAFVG00005004288.1
Andrenidae	Andrena fulva	PRDX	OG0005353	ENSAFVG00005012247.1
Andrenidae	Andrena fulva	PRDX	OG0005561	ENSAFVG00005008704.1
Andrenidae	Andrena fulva	PRDX	OG0006684	ENSAFVG00005009744.1
Andrenidae	Andrena fulva	REL	OG0000812	ENSAFVG00005013013.1
Andrenidae	Andrena fulva	REL	OG0003522	ENSAFVG00005000859.1
Andrenidae	Andrena fulva	SCR	OG0000321	ENSAFVG00005002901.1
Andrenidae	Andrena fulva	SCR	OG0000431	ENSAFVG00005011742.1
Andrenidae	Andrena fulva	SCR	OG0000431	ENSAFVG00005013402.1
Andrenidae	Andrena fulva	SCR	OG0000984	ENSAFVG00005011978.1
Andrenidae	Andrena fulva	SCR	OG0001434	ENSAFVG00005003325.1
Andrenidae	Andrena fulva	SCR	OG0002021	ENSAFVG00005013618.1
Andrenidae	Andrena fulva	SCR	OG0002535	ENSAFVG00005009169.1
Andrenidae	Andrena fulva	SCR	OG0002620	ENSAFVG00005014376.1
Andrenidae	Andrena fulva	SCR	OG0003366	ENSAFVG00005003875.1
Andrenidae	Andrena fulva	SCR	OG0003844	ENSAFVG00005012618.1
Andrenidae	Andrena fulva	SCR	OG0004910	ENSAFVG00005000956.1
Andrenidae	Andrena fulva	SCR	OG0006301	ENSAFVG00005013750.1
Andrenidae	Andrena fulva	SCR	OG0006498	ENSAFVG00005003732.1
Andrenidae	Andrena fulva	SCR	OG0007701	ENSAFVG00005013925.1
Andrenidae	Andrena fulva	SOD	OG0000245	ENSAFVG00005015158.1
Andrenidae	Andrena fulva	SOD	OG0000245	ENSAFVG00005015205.1
Andrenidae	Andrena fulva	SPZ	OG0000086	ENSAFVG00005003754.1
Andrenidae	Andrena fulva	SPZ	OG0000086	ENSAFVG00005004524.1
Andrenidae	Andrena fulva	SPZ	OG0000086	ENSAFVG00005014989.1
Andrenidae	Andrena fulva	SPZ	OG0000409	ENSAFVG00005000273.1
Andrenidae	Andrena fulva	SPZ	OG0000409	ENSAFVG00005002619.1
Andrenidae	Andrena fulva	SPZ	OG0002737	ENSAFVG00005000160.1
Andrenidae	Andrena fulva	SPZ	OG0004631	ENSAFVG00005000587.1
Andrenidae	Andrena fulva	SPZ	OG0007508	ENSAFVG00005000978.1
Andrenidae	Andrena fulva	SRPN	OG0000122	ENSAFVG00005001142.1
Andrenidae	Andrena fulva	SRPN	OG0001356	ENSAFVG00005012266.1
Andrenidae	Andrena fulva	SRPN	OG0001356	ENSAFVG00005012765.1
Andrenidae	Andrena fulva	SRPN	OG0001590	ENSAFVG00005003712.1
Andrenidae	Andrena fulva	SRPN	OG0001714	ENSAFVG00005003105.1
Andrenidae	Andrena fulva	SRPN	OG0004321	ENSAFVG00005015354.1
Andrenidae	Andrena fulva	SRPN	OG0007947	ENSAFVG00005014428.1
Andrenidae	Andrena fulva	SRRP	OG0000178	ENSAFVG00005000656.1
Andrenidae	Andrena fulva	SRRP	OG0000178	ENSAFVG00005001724.1
Andrenidae	Andrena fulva	SRRP	OG0000190	ENSAFVG00005012277.1
Andrenidae	Andrena fulva	SRRP	OG0000190	ENSAFVG00005013791.1
Andrenidae	Andrena fulva	SRRP	OG0000757	ENSAFVG00005000277.1
Andrenidae	Andrena fulva	SRRP	OG0000905	ENSAFVG00005004165.1
Andrenidae	Andrena fulva	SRRP	OG0000905	ENSAFVG00005014303.1
Andrenidae	Andrena fulva	SRRP	OG0001417	ENSAFVG00005014577.1
Andrenidae	Andrena fulva	SRRP	OG0001672	ENSAFVG00005008257.1
Andrenidae	Andrena fulva	SRRP	OG0001984	ENSAFVG00005013431.1
Andrenidae	Andrena fulva	SRRP	OG0001998	ENSAFVG00005015225.1
Andrenidae	Andrena fulva	SRRP	OG0002044	ENSAFVG00005000486.1
Andrenidae	Andrena fulva	SRRP	OG0002165	ENSAFVG00005007264.1
Andrenidae	Andrena fulva	SRRP	OG0002220	ENSAFVG00005007977.1
Andrenidae	Andrena fulva	SRRP	OG0002344	ENSAFVG00005006196.1
Andrenidae	Andrena fulva	SRRP	OG0002370	ENSAFVG00005010954.1
Andrenidae	Andrena fulva	SRRP	OG0002466	ENSAFVG00005008190.1
Andrenidae	Andrena fulva	SRRP	OG0002592	ENSAFVG00005011467.1
Andrenidae	Andrena fulva	SRRP	OG0003358	ENSAFVG00005001187.1
Andrenidae	Andrena fulva	SRRP	OG0003433	ENSAFVG00005002637.1
Andrenidae	Andrena fulva	SRRP	OG0003566	ENSAFVG00005010576.1
Andrenidae	Andrena fulva	SRRP	OG0003841	ENSAFVG00005010208.1
Andrenidae	Andrena fulva	SRRP	OG0004198	ENSAFVG00005005685.1
Andrenidae	Andrena fulva	SRRP	OG0004356	ENSAFVG00005013494.1
Andrenidae	Andrena fulva	SRRP	OG0004686	ENSAFVG00005000611.1
Andrenidae	Andrena fulva	SRRP	OG0004768	ENSAFVG00005012971.1
Andrenidae	Andrena fulva	SRRP	OG0005922	ENSAFVG00005014963.1
Andrenidae	Andrena fulva	SRRP	OG0006338	ENSAFVG00005000577.1
Andrenidae	Andrena fulva	SRRP	OG0007357	ENSAFVG00005015325.1
Andrenidae	Andrena fulva	TEP	OG0002197	ENSAFVG00005009218.1
Andrenidae	Andrena fulva	TEP	OG0002197	ENSAFVG00005010900.1
Andrenidae	Andrena fulva	TEP	OG0003051	ENSAFVG00005009280.1
Andrenidae	Andrena fulva	TEP	OG0004656	ENSAFVG00005001434.1
Andrenidae	Andrena fulva	TOLL	OG0001398	ENSAFVG00005012744.1
Andrenidae	Andrena fulva	TOLL	OG0001682	ENSAFVG00005010321.1
Andrenidae	Andrena fulva	TOLL	OG0002313	ENSAFVG00005001875.1
Andrenidae	Andrena fulva	TOLL	OG0003414	ENSAFVG00005013835.1
Andrenidae	Andrena fulva	TOLL	OG0003660	ENSAFVG00005014342.1
Andrenidae	Andrena fulva	TOLL	OG0004590	ENSAFVG00005015493.1
Andrenidae	Andrena fulva	TOLL	OG0004619	ENSAFVG00005000784.1
Andrenidae	Andrena fulva	TOLL	OG0007017	ENSAFVG00005008570.1
Andrenidae	Andrena fulva	TOLL	OG0007609	ENSAFVG00005013891.1
Andrenidae	Andrena haemorrhoa	AMP	OG0000327	ENSAHEG00005005364.1
Andrenidae	Andrena haemorrhoa	AMP	OG0000327	ENSAHEG00005007099.1
Andrenidae	Andrena haemorrhoa	AMP	OG0000327	ENSAHEG00005013989.1
Andrenidae	Andrena haemorrhoa	AMP	OG0001334	ENSAHEG00005003687.1
Andrenidae	Andrena haemorrhoa	APHAG	OG0002446	ENSAHEG00005011065.1
Andrenidae	Andrena haemorrhoa	APHAG	OG0003831	ENSAHEG00005003775.1
Andrenidae	Andrena haemorrhoa	APHAG	OG0003933	ENSAHEG00005001378.1
Andrenidae	Andrena haemorrhoa	APHAG	OG0004139	ENSAHEG00005014895.1
Andrenidae	Andrena haemorrhoa	APHAG	OG0004673	ENSAHEG00005006933.1
Andrenidae	Andrena haemorrhoa	APHAG	OG0004786	ENSAHEG00005013088.1
Andrenidae	Andrena haemorrhoa	APHAG	OG0004829	ENSAHEG00005003022.1
Andrenidae	Andrena haemorrhoa	APHAG	OG0005197	ENSAHEG00005010157.1
Andrenidae	Andrena haemorrhoa	APHAG	OG0005491	ENSAHEG00005014116.1
Andrenidae	Andrena haemorrhoa	APHAG	OG0005702	ENSAHEG00005014863.1
Andrenidae	Andrena haemorrhoa	APHAG	OG0005834	ENSAHEG00005007517.1
Andrenidae	Andrena haemorrhoa	APHAG	OG0005983	ENSAHEG00005011444.1
Andrenidae	Andrena haemorrhoa	APHAG	OG0006450	ENSAHEG00005009635.1
Andrenidae	Andrena haemorrhoa	APHAG	OG0006519	ENSAHEG00005011363.1
Andrenidae	Andrena haemorrhoa	APHAG	OG0006769	ENSAHEG00005009230.1
Andrenidae	Andrena haemorrhoa	APHAG	OG0006880	ENSAHEG00005012501.1
Andrenidae	Andrena haemorrhoa	ARK	OG0001701	ENSAHEG00005002344.1
Andrenidae	Andrena haemorrhoa	CASP	OG0000247	ENSAHEG00005000984.1
Andrenidae	Andrena haemorrhoa	CASP	OG0000247	ENSAHEG00005009161.1
Andrenidae	Andrena haemorrhoa	CASP	OG0002045	ENSAHEG00005014173.1
Andrenidae	Andrena haemorrhoa	CASP	OG0002713	ENSAHEG00005002963.1
Andrenidae	Andrena haemorrhoa	CASP	OG0003548	ENSAHEG00005003875.1
Andrenidae	Andrena haemorrhoa	CAT	OG0002400	ENSAHEG00005004348.1
Andrenidae	Andrena haemorrhoa	CLIP	OG0000100	ENSAHEG00005002087.1
Andrenidae	Andrena haemorrhoa	CLIP	OG0000857	ENSAHEG00005012556.1
Andrenidae	Andrena haemorrhoa	CLIP	OG0001104	ENSAHEG00005000016.1
Andrenidae	Andrena haemorrhoa	CLIP	OG0001530	ENSAHEG00005013251.1
Andrenidae	Andrena haemorrhoa	CLIP	OG0003918	ENSAHEG00005013233.1
Andrenidae	Andrena haemorrhoa	CLIP	OG0003952	ENSAHEG00005000098.1
Andrenidae	Andrena haemorrhoa	CLIP	OG0004548	ENSAHEG00005010652.1
Andrenidae	Andrena haemorrhoa	CLIP	OG0005173	ENSAHEG00005004478.1
Andrenidae	Andrena haemorrhoa	CLIP	OG0005417	ENSAHEG00005004533.1
Andrenidae	Andrena haemorrhoa	CLIP	OG0005447	ENSAHEG00005002457.1
Andrenidae	Andrena haemorrhoa	CLIP	OG0005762	ENSAHEG00005010134.1
Andrenidae	Andrena haemorrhoa	CLIP	OG0006813	ENSAHEG00005010882.1
Andrenidae	Andrena haemorrhoa	CLIP	OG0006967	ENSAHEG00005000692.1
Andrenidae	Andrena haemorrhoa	CLIP	OG0007332	ENSAHEG00005006860.1
Andrenidae	Andrena haemorrhoa	CLIP	OG0007742	ENSAHEG00005014190.1
Andrenidae	Andrena haemorrhoa	CTL	OG0001740	ENSAHEG00005003831.1
Andrenidae	Andrena haemorrhoa	CTL	OG0001823	ENSAHEG00005012108.1
Andrenidae	Andrena haemorrhoa	CTL	OG0003176	ENSAHEG00005004505.1
Andrenidae	Andrena haemorrhoa	CTL	OG0004881	ENSAHEG00005010700.1
Andrenidae	Andrena haemorrhoa	CTL	OG0005639	ENSAHEG00005002357.1
Andrenidae	Andrena haemorrhoa	CTL	OG0005791	ENSAHEG00005003470.1
Andrenidae	Andrena haemorrhoa	CTL	OG0006335	ENSAHEG00005002104.1
Andrenidae	Andrena haemorrhoa	CTL	OG0006524	ENSAHEG00005000020.1
Andrenidae	Andrena haemorrhoa	CTL	OG0006792	ENSAHEG00005014912.1
Andrenidae	Andrena haemorrhoa	CTL	OG0008136	ENSAHEG00005011921.1
Andrenidae	Andrena haemorrhoa	FREP	OG0000388	ENSAHEG00005013320.1
Andrenidae	Andrena haemorrhoa	FREP	OG0000388	ENSAHEG00005013502.1
Andrenidae	Andrena haemorrhoa	FREP	OG0001750	ENSAHEG00005008948.1
Andrenidae	Andrena haemorrhoa	GALE	OG0003190	ENSAHEG00005014446.1
Andrenidae	Andrena haemorrhoa	GALE	OG0004011	ENSAHEG00005003174.1
Andrenidae	Andrena haemorrhoa	GALE	OG0006683	ENSAHEG00005006989.1
Andrenidae	Andrena haemorrhoa	GNBP	OG0000914	ENSAHEG00005001666.1
Andrenidae	Andrena haemorrhoa	GNBP	OG0001694	ENSAHEG00005002651.1
Andrenidae	Andrena haemorrhoa	IAP	OG0000199	ENSAHEG00005012577.1
Andrenidae	Andrena haemorrhoa	IAP	OG0000199	ENSAHEG00005013006.1
Andrenidae	Andrena haemorrhoa	IAP	OG0000199	ENSAHEG00005013411.1
Andrenidae	Andrena haemorrhoa	IAP	OG0003978	ENSAHEG00005006804.1
Andrenidae	Andrena haemorrhoa	IAP	OG0004007	ENSAHEG00005010757.1
Andrenidae	Andrena haemorrhoa	IAP	OG0008676	ENSAHEG00005012856.1
Andrenidae	Andrena haemorrhoa	IGG	OG0000504	ENSAHEG00005003722.1
Andrenidae	Andrena haemorrhoa	IGG	OG0000504	ENSAHEG00005004061.1
Andrenidae	Andrena haemorrhoa	IGG	OG0000512	ENSAHEG00005004896.1
Andrenidae	Andrena haemorrhoa	IMD	OG0000611	ENSAHEG00005000002.1
Andrenidae	Andrena haemorrhoa	IMD	OG0000611	ENSAHEG00005002803.1
Andrenidae	Andrena haemorrhoa	IMD	OG0003945	ENSAHEG00005005783.1
Andrenidae	Andrena haemorrhoa	IMD	OG0005010	ENSAHEG00005000341.1
Andrenidae	Andrena haemorrhoa	IMD	OG0006148	ENSAHEG00005004340.1
Andrenidae	Andrena haemorrhoa	IMD	OG0006188	ENSAHEG00005005305.1
Andrenidae	Andrena haemorrhoa	IMD	OG0006444	ENSAHEG00005006267.1
Andrenidae	Andrena haemorrhoa	IMD	OG0008396	ENSAHEG00005004624.1
Andrenidae	Andrena haemorrhoa	JAST	OG0002385	ENSAHEG00005002737.1
Andrenidae	Andrena haemorrhoa	JAST	OG0002504	ENSAHEG00005000062.1
Andrenidae	Andrena haemorrhoa	JAST	OG0002998	ENSAHEG00005015271.1
Andrenidae	Andrena haemorrhoa	LYS	OG0007140	ENSAHEG00005010683.1
Andrenidae	Andrena haemorrhoa	ML	OG0001994	ENSAHEG00005000921.1
Andrenidae	Andrena haemorrhoa	ML	OG0002469	ENSAHEG00005005752.1
Andrenidae	Andrena haemorrhoa	ML	OG0008732	ENSAHEG00005000091.1
Andrenidae	Andrena haemorrhoa	NIM	OG0000346	ENSAHEG00005001977.1
Andrenidae	Andrena haemorrhoa	NIM	OG0000346	ENSAHEG00005002016.1
Andrenidae	Andrena haemorrhoa	NIM	OG0000346	ENSAHEG00005014583.1
Andrenidae	Andrena haemorrhoa	NIM	OG0000346	ENSAHEG00005015251.1
Andrenidae	Andrena haemorrhoa	NIM	OG0002945	ENSAHEG00005014218.1
Andrenidae	Andrena haemorrhoa	NIM	OG0008120	ENSAHEG00005001808.1
Andrenidae	Andrena haemorrhoa	NIM	OG0008120	ENSAHEG00005010621.1
Andrenidae	Andrena haemorrhoa	PGRP	OG0000398	ENSAHEG00005002390.1
Andrenidae	Andrena haemorrhoa	PGRP	OG0000398	ENSAHEG00005002740.1
Andrenidae	Andrena haemorrhoa	PGRP	OG0000398	ENSAHEG00005003806.1
Andrenidae	Andrena haemorrhoa	PGRP	OG0001034	ENSAHEG00005013458.1
Andrenidae	Andrena haemorrhoa	PGRP	OG0001352	ENSAHEG00005004448.1
Andrenidae	Andrena haemorrhoa	PPO	OG0000644	ENSAHEG00005006440.1
Andrenidae	Andrena haemorrhoa	PRDX	OG0000204	ENSAHEG00005000537.1
Andrenidae	Andrena haemorrhoa	PRDX	OG0000204	ENSAHEG00005007133.1
Andrenidae	Andrena haemorrhoa	PRDX	OG0000339	ENSAHEG00005005523.1
Andrenidae	Andrena haemorrhoa	PRDX	OG0001974	ENSAHEG00005003354.1
Andrenidae	Andrena haemorrhoa	PRDX	OG0001986	ENSAHEG00005008433.1
Andrenidae	Andrena haemorrhoa	PRDX	OG0002022	ENSAHEG00005001848.1
Andrenidae	Andrena haemorrhoa	PRDX	OG0004270	ENSAHEG00005012966.1
Andrenidae	Andrena haemorrhoa	PRDX	OG0004336	ENSAHEG00005011829.1
Andrenidae	Andrena haemorrhoa	PRDX	OG0004664	ENSAHEG00005001287.1
Andrenidae	Andrena haemorrhoa	PRDX	OG0005353	ENSAHEG00005014319.1
Andrenidae	Andrena haemorrhoa	PRDX	OG0005561	ENSAHEG00005013637.1
Andrenidae	Andrena haemorrhoa	PRDX	OG0006684	ENSAHEG00005002532.1
Andrenidae	Andrena haemorrhoa	REL	OG0000812	ENSAHEG00005000614.1
Andrenidae	Andrena haemorrhoa	REL	OG0003522	ENSAHEG00005014692.1
Andrenidae	Andrena haemorrhoa	SCR	OG0000321	ENSAHEG00005002122.1
Andrenidae	Andrena haemorrhoa	SCR	OG0000321	ENSAHEG00005014268.1
Andrenidae	Andrena haemorrhoa	SCR	OG0000431	ENSAHEG00005004686.1
Andrenidae	Andrena haemorrhoa	SCR	OG0000984	ENSAHEG00005004512.1
Andrenidae	Andrena haemorrhoa	SCR	OG0001434	ENSAHEG00005006813.1
Andrenidae	Andrena haemorrhoa	SCR	OG0002021	ENSAHEG00005004547.1
Andrenidae	Andrena haemorrhoa	SCR	OG0002535	ENSAHEG00005001710.1
Andrenidae	Andrena haemorrhoa	SCR	OG0002620	ENSAHEG00005005399.1
Andrenidae	Andrena haemorrhoa	SCR	OG0003366	ENSAHEG00005001178.1
Andrenidae	Andrena haemorrhoa	SCR	OG0003844	ENSAHEG00005015099.1
Andrenidae	Andrena haemorrhoa	SCR	OG0004910	ENSAHEG00005014413.1
Andrenidae	Andrena haemorrhoa	SCR	OG0006301	ENSAHEG00005003436.1
Andrenidae	Andrena haemorrhoa	SCR	OG0006498	ENSAHEG00005002240.1
Andrenidae	Andrena haemorrhoa	SCR	OG0007701	ENSAHEG00005006986.1
Andrenidae	Andrena haemorrhoa	SOD	OG0000245	ENSAHEG00005005346.1
Andrenidae	Andrena haemorrhoa	SOD	OG0000245	ENSAHEG00005005873.1
Andrenidae	Andrena haemorrhoa	SPZ	OG0000086	ENSAHEG00005010867.1
Andrenidae	Andrena haemorrhoa	SPZ	OG0000086	ENSAHEG00005012900.1
Andrenidae	Andrena haemorrhoa	SPZ	OG0000086	ENSAHEG00005014514.1
Andrenidae	Andrena haemorrhoa	SPZ	OG0000409	ENSAHEG00005000259.1
Andrenidae	Andrena haemorrhoa	SPZ	OG0000409	ENSAHEG00005001399.1
Andrenidae	Andrena haemorrhoa	SPZ	OG0002737	ENSAHEG00005013877.1
Andrenidae	Andrena haemorrhoa	SPZ	OG0004631	ENSAHEG00005010069.1
Andrenidae	Andrena haemorrhoa	SPZ	OG0007508	ENSAHEG00005014317.1
Andrenidae	Andrena haemorrhoa	SRPN	OG0000122	ENSAHEG00005006639.1
Andrenidae	Andrena haemorrhoa	SRPN	OG0001063	ENSAHEG00005014898.1
Andrenidae	Andrena haemorrhoa	SRPN	OG0001356	ENSAHEG00005015197.1
Andrenidae	Andrena haemorrhoa	SRPN	OG0001590	ENSAHEG00005002189.1
Andrenidae	Andrena haemorrhoa	SRPN	OG0001714	ENSAHEG00005005679.1
Andrenidae	Andrena haemorrhoa	SRPN	OG0004321	ENSAHEG00005005820.1
Andrenidae	Andrena haemorrhoa	SRPN	OG0007947	ENSAHEG00005006026.1
Andrenidae	Andrena haemorrhoa	SRRP	OG0000178	ENSAHEG00005012232.1
Andrenidae	Andrena haemorrhoa	SRRP	OG0000190	ENSAHEG00005014572.1
Andrenidae	Andrena haemorrhoa	SRRP	OG0000190	ENSAHEG00005015300.1
Andrenidae	Andrena haemorrhoa	SRRP	OG0000757	ENSAHEG00005009690.1
Andrenidae	Andrena haemorrhoa	SRRP	OG0000757	ENSAHEG00005011347.1
Andrenidae	Andrena haemorrhoa	SRRP	OG0000905	ENSAHEG00005001521.1
Andrenidae	Andrena haemorrhoa	SRRP	OG0000905	ENSAHEG00005005359.1
Andrenidae	Andrena haemorrhoa	SRRP	OG0001417	ENSAHEG00005006702.1
Andrenidae	Andrena haemorrhoa	SRRP	OG0001672	ENSAHEG00005001172.1
Andrenidae	Andrena haemorrhoa	SRRP	OG0001984	ENSAHEG00005008342.1
Andrenidae	Andrena haemorrhoa	SRRP	OG0001998	ENSAHEG00005005745.1
Andrenidae	Andrena haemorrhoa	SRRP	OG0002044	ENSAHEG00005000552.1
Andrenidae	Andrena haemorrhoa	SRRP	OG0002165	ENSAHEG00005006701.1
Andrenidae	Andrena haemorrhoa	SRRP	OG0002220	ENSAHEG00005013549.1
Andrenidae	Andrena haemorrhoa	SRRP	OG0002344	ENSAHEG00005004214.1
Andrenidae	Andrena haemorrhoa	SRRP	OG0002370	ENSAHEG00005002555.1
Andrenidae	Andrena haemorrhoa	SRRP	OG0002466	ENSAHEG00005003177.1
Andrenidae	Andrena haemorrhoa	SRRP	OG0002592	ENSAHEG00005008672.1
Andrenidae	Andrena haemorrhoa	SRRP	OG0003358	ENSAHEG00005008896.1
Andrenidae	Andrena haemorrhoa	SRRP	OG0003433	ENSAHEG00005013777.1
Andrenidae	Andrena haemorrhoa	SRRP	OG0003566	ENSAHEG00005002482.1
Andrenidae	Andrena haemorrhoa	SRRP	OG0003841	ENSAHEG00005015071.1
Andrenidae	Andrena haemorrhoa	SRRP	OG0004198	ENSAHEG00005013461.1
Andrenidae	Andrena haemorrhoa	SRRP	OG0004356	ENSAHEG00005010521.1
Andrenidae	Andrena haemorrhoa	SRRP	OG0004686	ENSAHEG00005007544.1
Andrenidae	Andrena haemorrhoa	SRRP	OG0004768	ENSAHEG00005010784.1
Andrenidae	Andrena haemorrhoa	SRRP	OG0005922	ENSAHEG00005006320.1
Andrenidae	Andrena haemorrhoa	SRRP	OG0006338	ENSAHEG00005010546.1
Andrenidae	Andrena haemorrhoa	SRRP	OG0007357	ENSAHEG00005005319.1
Andrenidae	Andrena haemorrhoa	TEP	OG0002197	ENSAHEG00005004877.1
Andrenidae	Andrena haemorrhoa	TEP	OG0003051	ENSAHEG00005013894.1
Andrenidae	Andrena haemorrhoa	TEP	OG0004656	ENSAHEG00005014785.1
Andrenidae	Andrena haemorrhoa	TOLL	OG0001398	ENSAHEG00005004219.1
Andrenidae	Andrena haemorrhoa	TOLL	OG0001682	ENSAHEG00005010988.1
Andrenidae	Andrena haemorrhoa	TOLL	OG0002313	ENSAHEG00005014263.1
Andrenidae	Andrena haemorrhoa	TOLL	OG0003414	ENSAHEG00005005886.1
Andrenidae	Andrena haemorrhoa	TOLL	OG0003660	ENSAHEG00005008432.1
Andrenidae	Andrena haemorrhoa	TOLL	OG0004590	ENSAHEG00005007980.1
Andrenidae	Andrena haemorrhoa	TOLL	OG0004619	ENSAHEG00005011607.1
Andrenidae	Andrena haemorrhoa	TOLL	OG0007017	ENSAHEG00005003862.1
Andrenidae	Andrena haemorrhoa	TOLL	OG0007609	ENSAHEG00005005271.1
Andrenidae	Andrena hattorfiana	AMP	OG0000327	ENSAHTG00000012437.1
Andrenidae	Andrena hattorfiana	AMP	OG0001334	ENSAHTG00000011535.1
Andrenidae	Andrena hattorfiana	AMP	OG0009601	ENSAHTG00000013989.1
Andrenidae	Andrena hattorfiana	APHAG	OG0002446	ENSAHTG00000007723.1
Andrenidae	Andrena hattorfiana	APHAG	OG0003831	ENSAHTG00000013706.1
Andrenidae	Andrena hattorfiana	APHAG	OG0003933	ENSAHTG00000014235.1
Andrenidae	Andrena hattorfiana	APHAG	OG0004139	ENSAHTG00000000509.1
Andrenidae	Andrena hattorfiana	APHAG	OG0004673	ENSAHTG00000007003.1
Andrenidae	Andrena hattorfiana	APHAG	OG0004786	ENSAHTG00000005361.1
Andrenidae	Andrena hattorfiana	APHAG	OG0004829	ENSAHTG00000008645.1
Andrenidae	Andrena hattorfiana	APHAG	OG0005197	ENSAHTG00000009190.1
Andrenidae	Andrena hattorfiana	APHAG	OG0005491	ENSAHTG00000009018.1
Andrenidae	Andrena hattorfiana	APHAG	OG0005702	ENSAHTG00000003664.1
Andrenidae	Andrena hattorfiana	APHAG	OG0005834	ENSAHTG00000009529.1
Andrenidae	Andrena hattorfiana	APHAG	OG0005983	ENSAHTG00000002914.1
Andrenidae	Andrena hattorfiana	APHAG	OG0006450	ENSAHTG00000007853.1
Andrenidae	Andrena hattorfiana	APHAG	OG0006519	ENSAHTG00000007910.1
Andrenidae	Andrena hattorfiana	APHAG	OG0006769	ENSAHTG00000007749.1
Andrenidae	Andrena hattorfiana	APHAG	OG0006880	ENSAHTG00000001935.1
Andrenidae	Andrena hattorfiana	ARK	OG0001701	ENSAHTG00000000052.1
Andrenidae	Andrena hattorfiana	CASP	OG0000247	ENSAHTG00000009025.1
Andrenidae	Andrena hattorfiana	CASP	OG0000247	ENSAHTG00000013461.1
Andrenidae	Andrena hattorfiana	CASP	OG0002045	ENSAHTG00000011973.1
Andrenidae	Andrena hattorfiana	CASP	OG0002713	ENSAHTG00000009490.1
Andrenidae	Andrena hattorfiana	CASP	OG0003548	ENSAHTG00000010917.1
Andrenidae	Andrena hattorfiana	CAT	OG0002400	ENSAHTG00000014110.1
Andrenidae	Andrena hattorfiana	CLIP	OG0000100	ENSAHTG00000006533.1
Andrenidae	Andrena hattorfiana	CLIP	OG0000489	ENSAHTG00000005411.1
Andrenidae	Andrena hattorfiana	CLIP	OG0000857	ENSAHTG00000002906.1
Andrenidae	Andrena hattorfiana	CLIP	OG0000857	ENSAHTG00000004535.1
Andrenidae	Andrena hattorfiana	CLIP	OG0001104	ENSAHTG00000008494.1
Andrenidae	Andrena hattorfiana	CLIP	OG0001530	ENSAHTG00000008709.1
Andrenidae	Andrena hattorfiana	CLIP	OG0001530	ENSAHTG00000009379.1
Andrenidae	Andrena hattorfiana	CLIP	OG0003918	ENSAHTG00000004137.1
Andrenidae	Andrena hattorfiana	CLIP	OG0003952	ENSAHTG00000006469.1
Andrenidae	Andrena hattorfiana	CLIP	OG0004548	ENSAHTG00000009764.1
Andrenidae	Andrena hattorfiana	CLIP	OG0005173	ENSAHTG00000010929.1
Andrenidae	Andrena hattorfiana	CLIP	OG0005417	ENSAHTG00000010723.1
Andrenidae	Andrena hattorfiana	CLIP	OG0005447	ENSAHTG00000005749.1
Andrenidae	Andrena hattorfiana	CLIP	OG0005762	ENSAHTG00000005445.1
Andrenidae	Andrena hattorfiana	CLIP	OG0006813	ENSAHTG00000007176.1
Andrenidae	Andrena hattorfiana	CLIP	OG0006967	ENSAHTG00000009648.1
Andrenidae	Andrena hattorfiana	CLIP	OG0007332	ENSAHTG00000006547.1
Andrenidae	Andrena hattorfiana	CLIP	OG0007742	ENSAHTG00000004861.1
Andrenidae	Andrena hattorfiana	CTL	OG0001740	ENSAHTG00000004506.1
Andrenidae	Andrena hattorfiana	CTL	OG0001823	ENSAHTG00000004926.1
Andrenidae	Andrena hattorfiana	CTL	OG0003176	ENSAHTG00000001051.1
Andrenidae	Andrena hattorfiana	CTL	OG0004881	ENSAHTG00000006936.1
Andrenidae	Andrena hattorfiana	CTL	OG0005639	ENSAHTG00000007711.1
Andrenidae	Andrena hattorfiana	CTL	OG0005791	ENSAHTG00000001442.1
Andrenidae	Andrena hattorfiana	CTL	OG0006335	ENSAHTG00000011441.1
Andrenidae	Andrena hattorfiana	CTL	OG0006524	ENSAHTG00000007841.1
Andrenidae	Andrena hattorfiana	CTL	OG0006792	ENSAHTG00000003074.1
Andrenidae	Andrena hattorfiana	CTL	OG0008136	ENSAHTG00000001800.1
Andrenidae	Andrena hattorfiana	FREP	OG0000388	ENSAHTG00000002665.1
Andrenidae	Andrena hattorfiana	FREP	OG0001750	ENSAHTG00000011339.1
Andrenidae	Andrena hattorfiana	GALE	OG0003190	ENSAHTG00000009384.1
Andrenidae	Andrena hattorfiana	GALE	OG0004011	ENSAHTG00000001813.1
Andrenidae	Andrena hattorfiana	GALE	OG0006683	ENSAHTG00000014089.1
Andrenidae	Andrena hattorfiana	GNBP	OG0000914	ENSAHTG00000009478.1
Andrenidae	Andrena hattorfiana	GNBP	OG0000914	ENSAHTG00000009749.1
Andrenidae	Andrena hattorfiana	GNBP	OG0000914	ENSAHTG00000010428.1
Andrenidae	Andrena hattorfiana	GNBP	OG0001694	ENSAHTG00000007824.1
Andrenidae	Andrena hattorfiana	IAP	OG0000199	ENSAHTG00000003543.1
Andrenidae	Andrena hattorfiana	IAP	OG0000199	ENSAHTG00000003660.1
Andrenidae	Andrena hattorfiana	IAP	OG0000199	ENSAHTG00000007879.1
Andrenidae	Andrena hattorfiana	IAP	OG0003978	ENSAHTG00000014205.1
Andrenidae	Andrena hattorfiana	IAP	OG0004007	ENSAHTG00000006896.1
Andrenidae	Andrena hattorfiana	IAP	OG0008676	ENSAHTG00000004977.1
Andrenidae	Andrena hattorfiana	IGG	OG0000504	ENSAHTG00000005566.1
Andrenidae	Andrena hattorfiana	IGG	OG0000504	ENSAHTG00000009933.1
Andrenidae	Andrena hattorfiana	IGG	OG0000512	ENSAHTG00000000074.1
Andrenidae	Andrena hattorfiana	IMD	OG0000611	ENSAHTG00000013712.1
Andrenidae	Andrena hattorfiana	IMD	OG0000611	ENSAHTG00000013776.1
Andrenidae	Andrena hattorfiana	IMD	OG0003945	ENSAHTG00000011289.1
Andrenidae	Andrena hattorfiana	IMD	OG0005010	ENSAHTG00000002247.1
Andrenidae	Andrena hattorfiana	IMD	OG0006148	ENSAHTG00000002944.1
Andrenidae	Andrena hattorfiana	IMD	OG0006188	ENSAHTG00000001333.1
Andrenidae	Andrena hattorfiana	IMD	OG0006444	ENSAHTG00000009171.1
Andrenidae	Andrena hattorfiana	IMD	OG0008396	ENSAHTG00000012854.1
Andrenidae	Andrena hattorfiana	JAST	OG0002385	ENSAHTG00000008184.1
Andrenidae	Andrena hattorfiana	JAST	OG0002504	ENSAHTG00000014153.1
Andrenidae	Andrena hattorfiana	JAST	OG0002998	ENSAHTG00000009315.1
Andrenidae	Andrena hattorfiana	LYS	OG0007140	ENSAHTG00000011707.1
Andrenidae	Andrena hattorfiana	ML	OG0001994	ENSAHTG00000012930.1
Andrenidae	Andrena hattorfiana	ML	OG0002469	ENSAHTG00000011229.1
Andrenidae	Andrena hattorfiana	ML	OG0008732	ENSAHTG00000013578.1
Andrenidae	Andrena hattorfiana	NIM	OG0000346	ENSAHTG00000005401.1
Andrenidae	Andrena hattorfiana	NIM	OG0000346	ENSAHTG00000005425.1
Andrenidae	Andrena hattorfiana	NIM	OG0002945	ENSAHTG00000005957.1
Andrenidae	Andrena hattorfiana	NIM	OG0008120	ENSAHTG00000007869.1
Andrenidae	Andrena hattorfiana	PGRP	OG0000398	ENSAHTG00000009680.1
Andrenidae	Andrena hattorfiana	PGRP	OG0000398	ENSAHTG00000010994.1
Andrenidae	Andrena hattorfiana	PGRP	OG0001034	ENSAHTG00000003116.1
Andrenidae	Andrena hattorfiana	PGRP	OG0001352	ENSAHTG00000013768.1
Andrenidae	Andrena hattorfiana	PPO	OG0000644	ENSAHTG00000003501.1
Andrenidae	Andrena hattorfiana	PRDX	OG0000204	ENSAHTG00000004953.1
Andrenidae	Andrena hattorfiana	PRDX	OG0000204	ENSAHTG00000011960.1
Andrenidae	Andrena hattorfiana	PRDX	OG0000339	ENSAHTG00000004837.1
Andrenidae	Andrena hattorfiana	PRDX	OG0001974	ENSAHTG00000008846.1
Andrenidae	Andrena hattorfiana	PRDX	OG0001986	ENSAHTG00000007964.1
Andrenidae	Andrena hattorfiana	PRDX	OG0002022	ENSAHTG00000006249.1
Andrenidae	Andrena hattorfiana	PRDX	OG0004270	ENSAHTG00000000736.1
Andrenidae	Andrena hattorfiana	PRDX	OG0004336	ENSAHTG00000002275.1
Andrenidae	Andrena hattorfiana	PRDX	OG0004664	ENSAHTG00000007735.1
Andrenidae	Andrena hattorfiana	PRDX	OG0005353	ENSAHTG00000008667.1
Andrenidae	Andrena hattorfiana	PRDX	OG0005561	ENSAHTG00000003773.1
Andrenidae	Andrena hattorfiana	PRDX	OG0006684	ENSAHTG00000007066.1
Andrenidae	Andrena hattorfiana	REL	OG0000812	ENSAHTG00000009182.1
Andrenidae	Andrena hattorfiana	REL	OG0003522	ENSAHTG00000013159.1
Andrenidae	Andrena hattorfiana	SCR	OG0000321	ENSAHTG00000009188.1
Andrenidae	Andrena hattorfiana	SCR	OG0000321	ENSAHTG00000012859.1
Andrenidae	Andrena hattorfiana	SCR	OG0000431	ENSAHTG00000008810.1
Andrenidae	Andrena hattorfiana	SCR	OG0000984	ENSAHTG00000006509.1
Andrenidae	Andrena hattorfiana	SCR	OG0001434	ENSAHTG00000013005.1
Andrenidae	Andrena hattorfiana	SCR	OG0002021	ENSAHTG00000007395.1
Andrenidae	Andrena hattorfiana	SCR	OG0002535	ENSAHTG00000012286.1
Andrenidae	Andrena hattorfiana	SCR	OG0002620	ENSAHTG00000002367.1
Andrenidae	Andrena hattorfiana	SCR	OG0003366	ENSAHTG00000008783.1
Andrenidae	Andrena hattorfiana	SCR	OG0003844	ENSAHTG00000008020.1
Andrenidae	Andrena hattorfiana	SCR	OG0004910	ENSAHTG00000013050.1
Andrenidae	Andrena hattorfiana	SCR	OG0006301	ENSAHTG00000009198.1
Andrenidae	Andrena hattorfiana	SCR	OG0006498	ENSAHTG00000011791.1
Andrenidae	Andrena hattorfiana	SCR	OG0007701	ENSAHTG00000012550.1
Andrenidae	Andrena hattorfiana	SOD	OG0000245	ENSAHTG00000004600.1
Andrenidae	Andrena hattorfiana	SOD	OG0000245	ENSAHTG00000005328.1
Andrenidae	Andrena hattorfiana	SOD	OG0000245	ENSAHTG00000006241.1
Andrenidae	Andrena hattorfiana	SPZ	OG0000086	ENSAHTG00000004732.1
Andrenidae	Andrena hattorfiana	SPZ	OG0000086	ENSAHTG00000010161.1
Andrenidae	Andrena hattorfiana	SPZ	OG0000086	ENSAHTG00000012170.1
Andrenidae	Andrena hattorfiana	SPZ	OG0000409	ENSAHTG00000012450.1
Andrenidae	Andrena hattorfiana	SPZ	OG0002737	ENSAHTG00000011275.1
Andrenidae	Andrena hattorfiana	SPZ	OG0004631	ENSAHTG00000004876.1
Andrenidae	Andrena hattorfiana	SPZ	OG0007508	ENSAHTG00000013652.1
Andrenidae	Andrena hattorfiana	SRPN	OG0000122	ENSAHTG00000000897.1
Andrenidae	Andrena hattorfiana	SRPN	OG0000122	ENSAHTG00000002783.1
Andrenidae	Andrena hattorfiana	SRPN	OG0000122	ENSAHTG00000006152.1
Andrenidae	Andrena hattorfiana	SRPN	OG0001356	ENSAHTG00000008510.1
Andrenidae	Andrena hattorfiana	SRPN	OG0001590	ENSAHTG00000004040.1
Andrenidae	Andrena hattorfiana	SRPN	OG0001714	ENSAHTG00000009152.1
Andrenidae	Andrena hattorfiana	SRPN	OG0004321	ENSAHTG00000001697.1
Andrenidae	Andrena hattorfiana	SRPN	OG0007947	ENSAHTG00000011279.1
Andrenidae	Andrena hattorfiana	SRRP	OG0000178	ENSAHTG00000004681.1
Andrenidae	Andrena hattorfiana	SRRP	OG0000190	ENSAHTG00000006758.1
Andrenidae	Andrena hattorfiana	SRRP	OG0000190	ENSAHTG00000007305.1
Andrenidae	Andrena hattorfiana	SRRP	OG0000190	ENSAHTG00000007443.1
Andrenidae	Andrena hattorfiana	SRRP	OG0000757	ENSAHTG00000005925.1
Andrenidae	Andrena hattorfiana	SRRP	OG0000905	ENSAHTG00000005354.1
Andrenidae	Andrena hattorfiana	SRRP	OG0000905	ENSAHTG00000005974.1
Andrenidae	Andrena hattorfiana	SRRP	OG0001417	ENSAHTG00000011794.1
Andrenidae	Andrena hattorfiana	SRRP	OG0001672	ENSAHTG00000009833.1
Andrenidae	Andrena hattorfiana	SRRP	OG0001984	ENSAHTG00000007680.1
Andrenidae	Andrena hattorfiana	SRRP	OG0001998	ENSAHTG00000006413.1
Andrenidae	Andrena hattorfiana	SRRP	OG0002044	ENSAHTG00000003578.1
Andrenidae	Andrena hattorfiana	SRRP	OG0002165	ENSAHTG00000011525.1
Andrenidae	Andrena hattorfiana	SRRP	OG0002220	ENSAHTG00000003257.1
Andrenidae	Andrena hattorfiana	SRRP	OG0002344	ENSAHTG00000013299.1
Andrenidae	Andrena hattorfiana	SRRP	OG0002370	ENSAHTG00000011590.1
Andrenidae	Andrena hattorfiana	SRRP	OG0002466	ENSAHTG00000014063.1
Andrenidae	Andrena hattorfiana	SRRP	OG0002592	ENSAHTG00000009211.1
Andrenidae	Andrena hattorfiana	SRRP	OG0003358	ENSAHTG00000005057.1
Andrenidae	Andrena hattorfiana	SRRP	OG0003433	ENSAHTG00000010468.1
Andrenidae	Andrena hattorfiana	SRRP	OG0003566	ENSAHTG00000010091.1
Andrenidae	Andrena hattorfiana	SRRP	OG0003841	ENSAHTG00000008960.1
Andrenidae	Andrena hattorfiana	SRRP	OG0004198	ENSAHTG00000003036.1
Andrenidae	Andrena hattorfiana	SRRP	OG0004356	ENSAHTG00000001310.1
Andrenidae	Andrena hattorfiana	SRRP	OG0004686	ENSAHTG00000005694.1
Andrenidae	Andrena hattorfiana	SRRP	OG0004768	ENSAHTG00000009500.1
Andrenidae	Andrena hattorfiana	SRRP	OG0005922	ENSAHTG00000004023.1
Andrenidae	Andrena hattorfiana	SRRP	OG0006338	ENSAHTG00000005111.1
Andrenidae	Andrena hattorfiana	SRRP	OG0007357	ENSAHTG00000003966.1
Andrenidae	Andrena hattorfiana	TEP	OG0002197	ENSAHTG00000001498.1
Andrenidae	Andrena hattorfiana	TEP	OG0003051	ENSAHTG00000004209.1
Andrenidae	Andrena hattorfiana	TEP	OG0004656	ENSAHTG00000009564.1
Andrenidae	Andrena hattorfiana	TOLL	OG0001398	ENSAHTG00000009227.1
Andrenidae	Andrena hattorfiana	TOLL	OG0001682	ENSAHTG00000001913.1
Andrenidae	Andrena hattorfiana	TOLL	OG0002313	ENSAHTG00000008905.1
Andrenidae	Andrena hattorfiana	TOLL	OG0003414	ENSAHTG00000013445.1
Andrenidae	Andrena hattorfiana	TOLL	OG0003660	ENSAHTG00000012292.1
Andrenidae	Andrena hattorfiana	TOLL	OG0004590	ENSAHTG00000013457.1
Andrenidae	Andrena hattorfiana	TOLL	OG0004619	ENSAHTG00000007286.1
Andrenidae	Andrena hattorfiana	TOLL	OG0007017	ENSAHTG00000004240.1
Andrenidae	Andrena hattorfiana	TOLL	OG0007609	ENSAHTG00000003672.1
Andrenidae	Andrena minutula	AMP	OG0000327	ENSAEAG00005002122.1
Andrenidae	Andrena minutula	AMP	OG0000327	ENSAEAG00005002334.1
Andrenidae	Andrena minutula	AMP	OG0000327	ENSAEAG00005004086.1
Andrenidae	Andrena minutula	AMP	OG0001334	ENSAEAG00005001025.1
Andrenidae	Andrena minutula	AMP	OG0009601	ENSAEAG00005003340.1
Andrenidae	Andrena minutula	APHAG	OG0002446	ENSAEAG00005012083.1
Andrenidae	Andrena minutula	APHAG	OG0003831	ENSAEAG00005007549.1
Andrenidae	Andrena minutula	APHAG	OG0003933	ENSAEAG00005008786.1
Andrenidae	Andrena minutula	APHAG	OG0004139	ENSAEAG00005010883.1
Andrenidae	Andrena minutula	APHAG	OG0004673	ENSAEAG00005012827.1
Andrenidae	Andrena minutula	APHAG	OG0004786	ENSAEAG00005010612.1
Andrenidae	Andrena minutula	APHAG	OG0004829	ENSAEAG00005007384.1
Andrenidae	Andrena minutula	APHAG	OG0005197	ENSAEAG00005010841.1
Andrenidae	Andrena minutula	APHAG	OG0005491	ENSAEAG00005002607.1
Andrenidae	Andrena minutula	APHAG	OG0005702	ENSAEAG00005008864.1
Andrenidae	Andrena minutula	APHAG	OG0005834	ENSAEAG00005012907.1
Andrenidae	Andrena minutula	APHAG	OG0005983	ENSAEAG00005007647.1
Andrenidae	Andrena minutula	APHAG	OG0006450	ENSAEAG00005011083.1
Andrenidae	Andrena minutula	APHAG	OG0006519	ENSAEAG00005010814.1
Andrenidae	Andrena minutula	APHAG	OG0006769	ENSAEAG00005011104.1
Andrenidae	Andrena minutula	APHAG	OG0006880	ENSAEAG00005007210.1
Andrenidae	Andrena minutula	ARK	OG0001701	ENSAEAG00005008142.1
Andrenidae	Andrena minutula	CASP	OG0000247	ENSAEAG00005006742.1
Andrenidae	Andrena minutula	CASP	OG0000247	ENSAEAG00005011776.1
Andrenidae	Andrena minutula	CASP	OG0002045	ENSAEAG00005004428.1
Andrenidae	Andrena minutula	CASP	OG0002713	ENSAEAG00005003041.1
Andrenidae	Andrena minutula	CASP	OG0003548	ENSAEAG00005000136.1
Andrenidae	Andrena minutula	CAT	OG0002400	ENSAEAG00005003501.1
Andrenidae	Andrena minutula	CLIP	OG0000100	ENSAEAG00005006210.1
Andrenidae	Andrena minutula	CLIP	OG0000100	ENSAEAG00005006707.1
Andrenidae	Andrena minutula	CLIP	OG0000100	ENSAEAG00005007923.1
Andrenidae	Andrena minutula	CLIP	OG0000489	ENSAEAG00005008079.1
Andrenidae	Andrena minutula	CLIP	OG0000857	ENSAEAG00005001705.1
Andrenidae	Andrena minutula	CLIP	OG0000857	ENSAEAG00005002522.1
Andrenidae	Andrena minutula	CLIP	OG0000857	ENSAEAG00005003899.1
Andrenidae	Andrena minutula	CLIP	OG0000857	ENSAEAG00005005601.1
Andrenidae	Andrena minutula	CLIP	OG0000857	ENSAEAG00005011155.1
Andrenidae	Andrena minutula	CLIP	OG0001104	ENSAEAG00005011755.1
Andrenidae	Andrena minutula	CLIP	OG0001530	ENSAEAG00005004656.1
Andrenidae	Andrena minutula	CLIP	OG0003918	ENSAEAG00005006174.1
Andrenidae	Andrena minutula	CLIP	OG0003952	ENSAEAG00005011969.1
Andrenidae	Andrena minutula	CLIP	OG0004548	ENSAEAG00005002245.1
Andrenidae	Andrena minutula	CLIP	OG0005173	ENSAEAG00005009022.1
Andrenidae	Andrena minutula	CLIP	OG0005417	ENSAEAG00005007890.1
Andrenidae	Andrena minutula	CLIP	OG0005447	ENSAEAG00005012674.1
Andrenidae	Andrena minutula	CLIP	OG0005762	ENSAEAG00005010703.1
Andrenidae	Andrena minutula	CLIP	OG0006813	ENSAEAG00005012393.1
Andrenidae	Andrena minutula	CLIP	OG0006967	ENSAEAG00005008078.1
Andrenidae	Andrena minutula	CLIP	OG0007332	ENSAEAG00005012062.1
Andrenidae	Andrena minutula	CLIP	OG0007742	ENSAEAG00005012200.1
Andrenidae	Andrena minutula	CTL	OG0001740	ENSAEAG00005007238.1
Andrenidae	Andrena minutula	CTL	OG0001823	ENSAEAG00005001130.1
Andrenidae	Andrena minutula	CTL	OG0003176	ENSAEAG00005004297.1
Andrenidae	Andrena minutula	CTL	OG0004881	ENSAEAG00005012782.1
Andrenidae	Andrena minutula	CTL	OG0005639	ENSAEAG00005002011.1
Andrenidae	Andrena minutula	CTL	OG0005791	ENSAEAG00005002483.1
Andrenidae	Andrena minutula	CTL	OG0006335	ENSAEAG00005001859.1
Andrenidae	Andrena minutula	CTL	OG0006524	ENSAEAG00005004387.1
Andrenidae	Andrena minutula	CTL	OG0006792	ENSAEAG00005009494.1
Andrenidae	Andrena minutula	CTL	OG0008136	ENSAEAG00005000908.1
Andrenidae	Andrena minutula	FREP	OG0000388	ENSAEAG00005004363.1
Andrenidae	Andrena minutula	FREP	OG0001750	ENSAEAG00005002020.1
Andrenidae	Andrena minutula	GALE	OG0003190	ENSAEAG00005001983.1
Andrenidae	Andrena minutula	GALE	OG0004011	ENSAEAG00005002637.1
Andrenidae	Andrena minutula	GALE	OG0006683	ENSAEAG00005008032.1
Andrenidae	Andrena minutula	GNBP	OG0000914	ENSAEAG00005003651.1
Andrenidae	Andrena minutula	GNBP	OG0000914	ENSAEAG00005005530.1
Andrenidae	Andrena minutula	GNBP	OG0001694	ENSAEAG00005007364.1
Andrenidae	Andrena minutula	IAP	OG0000199	ENSAEAG00005007264.1
Andrenidae	Andrena minutula	IAP	OG0000199	ENSAEAG00005009244.1
Andrenidae	Andrena minutula	IAP	OG0003978	ENSAEAG00005007077.1
Andrenidae	Andrena minutula	IAP	OG0004007	ENSAEAG00005010536.1
Andrenidae	Andrena minutula	IAP	OG0008676	ENSAEAG00005010584.1
Andrenidae	Andrena minutula	IGG	OG0000504	ENSAEAG00005009532.1
Andrenidae	Andrena minutula	IGG	OG0000512	ENSAEAG00005006276.1
Andrenidae	Andrena minutula	IGG	OG0000512	ENSAEAG00005007118.1
Andrenidae	Andrena minutula	IMD	OG0000611	ENSAEAG00005007293.1
Andrenidae	Andrena minutula	IMD	OG0000611	ENSAEAG00005008930.1
Andrenidae	Andrena minutula	IMD	OG0003945	ENSAEAG00005008337.1
Andrenidae	Andrena minutula	IMD	OG0005010	ENSAEAG00005009219.1
Andrenidae	Andrena minutula	IMD	OG0006148	ENSAEAG00005006098.1
Andrenidae	Andrena minutula	IMD	OG0006188	ENSAEAG00005006765.1
Andrenidae	Andrena minutula	IMD	OG0006444	ENSAEAG00005002268.1
Andrenidae	Andrena minutula	IMD	OG0008396	ENSAEAG00005009033.1
Andrenidae	Andrena minutula	JAST	OG0002385	ENSAEAG00005008344.1
Andrenidae	Andrena minutula	JAST	OG0002504	ENSAEAG00005006639.1
Andrenidae	Andrena minutula	JAST	OG0002998	ENSAEAG00005012968.1
Andrenidae	Andrena minutula	LYS	OG0007140	ENSAEAG00005003030.1
Andrenidae	Andrena minutula	ML	OG0001994	ENSAEAG00005004710.1
Andrenidae	Andrena minutula	ML	OG0002469	ENSAEAG00005005077.1
Andrenidae	Andrena minutula	NIM	OG0000346	ENSAEAG00005012294.1
Andrenidae	Andrena minutula	NIM	OG0000346	ENSAEAG00005012354.1
Andrenidae	Andrena minutula	NIM	OG0000346	ENSAEAG00005012685.1
Andrenidae	Andrena minutula	NIM	OG0002945	ENSAEAG00005011057.1
Andrenidae	Andrena minutula	NIM	OG0008120	ENSAEAG00005012075.1
Andrenidae	Andrena minutula	PGRP	OG0000398	ENSAEAG00005001364.1
Andrenidae	Andrena minutula	PGRP	OG0000398	ENSAEAG00005002541.1
Andrenidae	Andrena minutula	PGRP	OG0001034	ENSAEAG00005000762.1
Andrenidae	Andrena minutula	PGRP	OG0001352	ENSAEAG00005009328.1
Andrenidae	Andrena minutula	PPO	OG0000644	ENSAEAG00005008835.1
Andrenidae	Andrena minutula	PRDX	OG0000204	ENSAEAG00005006292.1
Andrenidae	Andrena minutula	PRDX	OG0000204	ENSAEAG00005012489.1
Andrenidae	Andrena minutula	PRDX	OG0000339	ENSAEAG00005012094.1
Andrenidae	Andrena minutula	PRDX	OG0000339	ENSAEAG00005012681.1
Andrenidae	Andrena minutula	PRDX	OG0001974	ENSAEAG00005001666.1
Andrenidae	Andrena minutula	PRDX	OG0001974	ENSAEAG00005005564.1
Andrenidae	Andrena minutula	PRDX	OG0001986	ENSAEAG00005011990.1
Andrenidae	Andrena minutula	PRDX	OG0002022	ENSAEAG00005006756.1
Andrenidae	Andrena minutula	PRDX	OG0004270	ENSAEAG00005002432.1
Andrenidae	Andrena minutula	PRDX	OG0004336	ENSAEAG00005006106.1
Andrenidae	Andrena minutula	PRDX	OG0004664	ENSAEAG00005004626.1
Andrenidae	Andrena minutula	PRDX	OG0005353	ENSAEAG00005010659.1
Andrenidae	Andrena minutula	PRDX	OG0005561	ENSAEAG00005002319.1
Andrenidae	Andrena minutula	PRDX	OG0006684	ENSAEAG00005011297.1
Andrenidae	Andrena minutula	REL	OG0000812	ENSAEAG00005008044.1
Andrenidae	Andrena minutula	REL	OG0003522	ENSAEAG00005005801.1
Andrenidae	Andrena minutula	SCR	OG0000321	ENSAEAG00005002587.1
Andrenidae	Andrena minutula	SCR	OG0000321	ENSAEAG00005004810.1
Andrenidae	Andrena minutula	SCR	OG0000431	ENSAEAG00005009152.1
Andrenidae	Andrena minutula	SCR	OG0000984	ENSAEAG00005006502.1
Andrenidae	Andrena minutula	SCR	OG0001434	ENSAEAG00005004517.1
Andrenidae	Andrena minutula	SCR	OG0002021	ENSAEAG00005008323.1
Andrenidae	Andrena minutula	SCR	OG0002535	ENSAEAG00005004476.1
Andrenidae	Andrena minutula	SCR	OG0002620	ENSAEAG00005013147.1
Andrenidae	Andrena minutula	SCR	OG0003366	ENSAEAG00005002948.1
Andrenidae	Andrena minutula	SCR	OG0003844	ENSAEAG00005013056.1
Andrenidae	Andrena minutula	SCR	OG0004910	ENSAEAG00005001124.1
Andrenidae	Andrena minutula	SCR	OG0006301	ENSAEAG00005006183.1
Andrenidae	Andrena minutula	SCR	OG0006498	ENSAEAG00005002167.1
Andrenidae	Andrena minutula	SCR	OG0007701	ENSAEAG00005002399.1
Andrenidae	Andrena minutula	SOD	OG0000245	ENSAEAG00005009886.1
Andrenidae	Andrena minutula	SOD	OG0000245	ENSAEAG00005012280.1
Andrenidae	Andrena minutula	SOD	OG0000245	ENSAEAG00005012550.1
Andrenidae	Andrena minutula	SPZ	OG0000086	ENSAEAG00005001092.1
Andrenidae	Andrena minutula	SPZ	OG0000086	ENSAEAG00005002991.1
Andrenidae	Andrena minutula	SPZ	OG0000086	ENSAEAG00005004235.1
Andrenidae	Andrena minutula	SPZ	OG0000086	ENSAEAG00005012498.1
Andrenidae	Andrena minutula	SPZ	OG0000409	ENSAEAG00005003827.1
Andrenidae	Andrena minutula	SPZ	OG0000409	ENSAEAG00005004720.1
Andrenidae	Andrena minutula	SPZ	OG0002737	ENSAEAG00005003349.1
Andrenidae	Andrena minutula	SPZ	OG0004631	ENSAEAG00005009551.1
Andrenidae	Andrena minutula	SPZ	OG0007508	ENSAEAG00005003967.1
Andrenidae	Andrena minutula	SRPN	OG0000122	ENSAEAG00005003080.1
Andrenidae	Andrena minutula	SRPN	OG0000122	ENSAEAG00005003559.1
Andrenidae	Andrena minutula	SRPN	OG0000122	ENSAEAG00005003870.1
Andrenidae	Andrena minutula	SRPN	OG0000122	ENSAEAG00005010422.1
Andrenidae	Andrena minutula	SRPN	OG0001063	ENSAEAG00005013068.1
Andrenidae	Andrena minutula	SRPN	OG0001356	ENSAEAG00005013099.1
Andrenidae	Andrena minutula	SRPN	OG0001356	ENSAEAG00005013133.1
Andrenidae	Andrena minutula	SRPN	OG0001590	ENSAEAG00005008724.1
Andrenidae	Andrena minutula	SRPN	OG0001714	ENSAEAG00005012434.1
Andrenidae	Andrena minutula	SRPN	OG0004321	ENSAEAG00005010556.1
Andrenidae	Andrena minutula	SRPN	OG0007947	ENSAEAG00005001947.1
Andrenidae	Andrena minutula	SRRP	OG0000178	ENSAEAG00005010341.1
Andrenidae	Andrena minutula	SRRP	OG0000190	ENSAEAG00005010035.1
Andrenidae	Andrena minutula	SRRP	OG0000190	ENSAEAG00005010205.1
Andrenidae	Andrena minutula	SRRP	OG0000190	ENSAEAG00005012387.1
Andrenidae	Andrena minutula	SRRP	OG0000757	ENSAEAG00005011259.1
Andrenidae	Andrena minutula	SRRP	OG0000905	ENSAEAG00005008978.1
Andrenidae	Andrena minutula	SRRP	OG0000905	ENSAEAG00005012866.1
Andrenidae	Andrena minutula	SRRP	OG0001417	ENSAEAG00005000698.1
Andrenidae	Andrena minutula	SRRP	OG0001672	ENSAEAG00005002119.1
Andrenidae	Andrena minutula	SRRP	OG0001984	ENSAEAG00005012884.1
Andrenidae	Andrena minutula	SRRP	OG0001998	ENSAEAG00005013027.1
Andrenidae	Andrena minutula	SRRP	OG0002044	ENSAEAG00005009372.1
Andrenidae	Andrena minutula	SRRP	OG0002165	ENSAEAG00005007502.1
Andrenidae	Andrena minutula	SRRP	OG0002220	ENSAEAG00005001559.1
Andrenidae	Andrena minutula	SRRP	OG0002344	ENSAEAG00005002348.1
Andrenidae	Andrena minutula	SRRP	OG0002370	ENSAEAG00005002872.1
Andrenidae	Andrena minutula	SRRP	OG0002466	ENSAEAG00005004697.1
Andrenidae	Andrena minutula	SRRP	OG0002592	ENSAEAG00005013103.1
Andrenidae	Andrena minutula	SRRP	OG0003358	ENSAEAG00005013044.1
Andrenidae	Andrena minutula	SRRP	OG0003433	ENSAEAG00005004602.1
Andrenidae	Andrena minutula	SRRP	OG0003566	ENSAEAG00005001825.1
Andrenidae	Andrena minutula	SRRP	OG0003841	ENSAEAG00005010854.1
Andrenidae	Andrena minutula	SRRP	OG0004198	ENSAEAG00005002656.1
Andrenidae	Andrena minutula	SRRP	OG0004356	ENSAEAG00005007195.1
Andrenidae	Andrena minutula	SRRP	OG0004686	ENSAEAG00005011250.1
Andrenidae	Andrena minutula	SRRP	OG0004768	ENSAEAG00005003198.1
Andrenidae	Andrena minutula	SRRP	OG0005922	ENSAEAG00005013051.1
Andrenidae	Andrena minutula	SRRP	OG0006338	ENSAEAG00005012330.1
Andrenidae	Andrena minutula	SRRP	OG0007357	ENSAEAG00005012682.1
Andrenidae	Andrena minutula	TEP	OG0002197	ENSAEAG00005003462.1
Andrenidae	Andrena minutula	TEP	OG0003051	ENSAEAG00005008245.1
Andrenidae	Andrena minutula	TEP	OG0004656	ENSAEAG00005006343.1
Andrenidae	Andrena minutula	TOLL	OG0001398	ENSAEAG00005006041.1
Andrenidae	Andrena minutula	TOLL	OG0001682	ENSAEAG00005007048.1
Andrenidae	Andrena minutula	TOLL	OG0002313	ENSAEAG00005004615.1
Andrenidae	Andrena minutula	TOLL	OG0003414	ENSAEAG00005002163.1
Andrenidae	Andrena minutula	TOLL	OG0003660	ENSAEAG00005004433.1
Andrenidae	Andrena minutula	TOLL	OG0004590	ENSAEAG00005007470.1
Andrenidae	Andrena minutula	TOLL	OG0004619	ENSAEAG00005011142.1
Andrenidae	Andrena minutula	TOLL	OG0007017	ENSAEAG00005006458.1
Andrenidae	Andrena minutula	TOLL	OG0007609	ENSAEAG00005011878.1
Andrenidae	Andrena trimmerana	AMP	OG0000327	ENSFOKG00000002742.2
Andrenidae	Andrena trimmerana	AMP	OG0000327	ENSFOKG00000003041.2
Andrenidae	Andrena trimmerana	AMP	OG0000327	ENSFOKG00000006044.2
Andrenidae	Andrena trimmerana	AMP	OG0000327	ENSFOKG00000011233.2
Andrenidae	Andrena trimmerana	AMP	OG0001334	ENSFOKG00000007975.2
Andrenidae	Andrena trimmerana	AMP	OG0009601	ENSFOKG00000004065.2
Andrenidae	Andrena trimmerana	APHAG	OG0002446	ENSFOKG00000004280.2
Andrenidae	Andrena trimmerana	APHAG	OG0003831	ENSFOKG00000001958.2
Andrenidae	Andrena trimmerana	APHAG	OG0003933	ENSFOKG00000004082.2
Andrenidae	Andrena trimmerana	APHAG	OG0004139	ENSFOKG00000005673.2
Andrenidae	Andrena trimmerana	APHAG	OG0004673	ENSFOKG00000007232.2
Andrenidae	Andrena trimmerana	APHAG	OG0004786	ENSFOKG00000007262.2
Andrenidae	Andrena trimmerana	APHAG	OG0004829	ENSFOKG00000004701.2
Andrenidae	Andrena trimmerana	APHAG	OG0005197	ENSFOKG00000007017.2
Andrenidae	Andrena trimmerana	APHAG	OG0005491	ENSFOKG00000006265.2
Andrenidae	Andrena trimmerana	APHAG	OG0005702	ENSFOKG00000004317.2
Andrenidae	Andrena trimmerana	APHAG	OG0005834	ENSFOKG00000010039.2
Andrenidae	Andrena trimmerana	APHAG	OG0005983	ENSFOKG00000000585.2
Andrenidae	Andrena trimmerana	APHAG	OG0006450	ENSFOKG00000005169.2
Andrenidae	Andrena trimmerana	APHAG	OG0006519	ENSFOKG00000005050.2
Andrenidae	Andrena trimmerana	APHAG	OG0006769	ENSFOKG00000008530.2
Andrenidae	Andrena trimmerana	APHAG	OG0006880	ENSFOKG00000003845.2
Andrenidae	Andrena trimmerana	ARK	OG0001701	ENSFOKG00000001382.2
Andrenidae	Andrena trimmerana	CASP	OG0000247	ENSFOKG00000003588.2
Andrenidae	Andrena trimmerana	CASP	OG0000247	ENSFOKG00000004634.2
Andrenidae	Andrena trimmerana	CASP	OG0002045	ENSFOKG00000002389.2
Andrenidae	Andrena trimmerana	CASP	OG0002713	ENSFOKG00000002525.2
Andrenidae	Andrena trimmerana	CASP	OG0003548	ENSFOKG00000007636.2
Andrenidae	Andrena trimmerana	CAT	OG0002400	ENSFOKG00000008655.2
Andrenidae	Andrena trimmerana	CLIP	OG0000100	ENSFOKG00000009093.2
Andrenidae	Andrena trimmerana	CLIP	OG0000100	ENSFOKG00000009390.2
Andrenidae	Andrena trimmerana	CLIP	OG0000489	ENSFOKG00000006862.2
Andrenidae	Andrena trimmerana	CLIP	OG0000489	ENSFOKG00000013961.1
Andrenidae	Andrena trimmerana	CLIP	OG0000857	ENSFOKG00000000133.2
Andrenidae	Andrena trimmerana	CLIP	OG0000857	ENSFOKG00000002645.2
Andrenidae	Andrena trimmerana	CLIP	OG0000857	ENSFOKG00000009153.2
Andrenidae	Andrena trimmerana	CLIP	OG0000857	ENSFOKG00000010006.2
Andrenidae	Andrena trimmerana	CLIP	OG0001104	ENSFOKG00000008901.2
Andrenidae	Andrena trimmerana	CLIP	OG0001286	ENSFOKG00000011470.2
Andrenidae	Andrena trimmerana	CLIP	OG0001530	ENSFOKG00000013315.1
Andrenidae	Andrena trimmerana	CLIP	OG0003918	ENSFOKG00000002316.2
Andrenidae	Andrena trimmerana	CLIP	OG0003952	ENSFOKG00000009262.2
Andrenidae	Andrena trimmerana	CLIP	OG0004548	ENSFOKG00000003851.2
Andrenidae	Andrena trimmerana	CLIP	OG0005173	ENSFOKG00000001233.2
Andrenidae	Andrena trimmerana	CLIP	OG0005417	ENSFOKG00000003143.2
Andrenidae	Andrena trimmerana	CLIP	OG0005447	ENSFOKG00000010686.2
Andrenidae	Andrena trimmerana	CLIP	OG0005762	ENSFOKG00000008180.2
Andrenidae	Andrena trimmerana	CLIP	OG0006813	ENSFOKG00000009129.2
Andrenidae	Andrena trimmerana	CLIP	OG0006967	ENSFOKG00000011333.2
Andrenidae	Andrena trimmerana	CLIP	OG0007332	ENSFOKG00000010810.2
Andrenidae	Andrena trimmerana	CTL	OG0001740	ENSFOKG00000006518.2
Andrenidae	Andrena trimmerana	CTL	OG0001823	ENSFOKG00000005245.2
Andrenidae	Andrena trimmerana	CTL	OG0003176	ENSFOKG00000005870.2
Andrenidae	Andrena trimmerana	CTL	OG0004881	ENSFOKG00000007054.2
Andrenidae	Andrena trimmerana	CTL	OG0005639	ENSFOKG00000005686.2
Andrenidae	Andrena trimmerana	CTL	OG0005791	ENSFOKG00000007749.2
Andrenidae	Andrena trimmerana	CTL	OG0006335	ENSFOKG00000006964.2
Andrenidae	Andrena trimmerana	CTL	OG0006524	ENSFOKG00000001939.2
Andrenidae	Andrena trimmerana	CTL	OG0006792	ENSFOKG00000009588.2
Andrenidae	Andrena trimmerana	CTL	OG0008136	ENSFOKG00000004574.2
Andrenidae	Andrena trimmerana	CTL	OG0008136	ENSFOKG00000013412.1
Andrenidae	Andrena trimmerana	FREP	OG0000388	ENSFOKG00000006794.2
Andrenidae	Andrena trimmerana	FREP	OG0000388	ENSFOKG00000006969.2
Andrenidae	Andrena trimmerana	FREP	OG0001750	ENSFOKG00000005969.2
Andrenidae	Andrena trimmerana	GALE	OG0003190	ENSFOKG00000007455.2
Andrenidae	Andrena trimmerana	GALE	OG0004011	ENSFOKG00000007369.2
Andrenidae	Andrena trimmerana	GALE	OG0006683	ENSFOKG00000001602.2
Andrenidae	Andrena trimmerana	GNBP	OG0000914	ENSFOKG00000003116.2
Andrenidae	Andrena trimmerana	GNBP	OG0000914	ENSFOKG00000007121.2
Andrenidae	Andrena trimmerana	GNBP	OG0001694	ENSFOKG00000011018.2
Andrenidae	Andrena trimmerana	IAP	OG0000199	ENSFOKG00000002408.2
Andrenidae	Andrena trimmerana	IAP	OG0000199	ENSFOKG00000005846.2
Andrenidae	Andrena trimmerana	IAP	OG0003978	ENSFOKG00000000635.2
Andrenidae	Andrena trimmerana	IAP	OG0004007	ENSFOKG00000010592.2
Andrenidae	Andrena trimmerana	IGG	OG0000504	ENSFOKG00000011353.2
Andrenidae	Andrena trimmerana	IGG	OG0000504	ENSFOKG00000014862.1
Andrenidae	Andrena trimmerana	IGG	OG0000512	ENSFOKG00000003387.2
Andrenidae	Andrena trimmerana	IGG	OG0000512	ENSFOKG00000003717.2
Andrenidae	Andrena trimmerana	IMD	OG0000611	ENSFOKG00000003770.2
Andrenidae	Andrena trimmerana	IMD	OG0003945	ENSFOKG00000005506.2
Andrenidae	Andrena trimmerana	IMD	OG0005010	ENSFOKG00000005371.2
Andrenidae	Andrena trimmerana	IMD	OG0006148	ENSFOKG00000002895.2
Andrenidae	Andrena trimmerana	IMD	OG0006188	ENSFOKG00000001670.2
Andrenidae	Andrena trimmerana	IMD	OG0006444	ENSFOKG00000001263.2
Andrenidae	Andrena trimmerana	IMD	OG0008396	ENSFOKG00000002676.2
Andrenidae	Andrena trimmerana	JAST	OG0002385	ENSFOKG00000007868.2
Andrenidae	Andrena trimmerana	JAST	OG0002504	ENSFOKG00000000948.2
Andrenidae	Andrena trimmerana	JAST	OG0002998	ENSFOKG00000011513.2
Andrenidae	Andrena trimmerana	LYS	OG0007140	ENSFOKG00000001726.2
Andrenidae	Andrena trimmerana	ML	OG0001994	ENSFOKG00000007674.2
Andrenidae	Andrena trimmerana	ML	OG0002469	ENSFOKG00000000993.2
Andrenidae	Andrena trimmerana	ML	OG0008465	ENSFOKG00000000367.2
Andrenidae	Andrena trimmerana	ML	OG0008732	ENSFOKG00000002842.2
Andrenidae	Andrena trimmerana	NIM	OG0000346	ENSFOKG00000009157.2
Andrenidae	Andrena trimmerana	NIM	OG0000346	ENSFOKG00000010174.2
Andrenidae	Andrena trimmerana	NIM	OG0000346	ENSFOKG00000012490.1
Andrenidae	Andrena trimmerana	NIM	OG0000346	ENSFOKG00000015190.1
Andrenidae	Andrena trimmerana	NIM	OG0002945	ENSFOKG00000011311.2
Andrenidae	Andrena trimmerana	NIM	OG0008120	ENSFOKG00000010821.2
Andrenidae	Andrena trimmerana	PGRP	OG0000398	ENSFOKG00000001594.2
Andrenidae	Andrena trimmerana	PGRP	OG0000398	ENSFOKG00000002448.2
Andrenidae	Andrena trimmerana	PGRP	OG0001034	ENSFOKG00000004967.2
Andrenidae	Andrena trimmerana	PGRP	OG0001352	ENSFOKG00000004490.2
Andrenidae	Andrena trimmerana	PGRP	OG0001352	ENSFOKG00000007370.2
Andrenidae	Andrena trimmerana	PPO	OG0000644	ENSFOKG00000009704.2
Andrenidae	Andrena trimmerana	PPO	OG0000644	ENSFOKG00000011583.2
Andrenidae	Andrena trimmerana	PRDX	OG0000204	ENSFOKG00000003190.2
Andrenidae	Andrena trimmerana	PRDX	OG0000204	ENSFOKG00000005270.2
Andrenidae	Andrena trimmerana	PRDX	OG0000339	ENSFOKG00000009316.2
Andrenidae	Andrena trimmerana	PRDX	OG0000339	ENSFOKG00000010189.2
Andrenidae	Andrena trimmerana	PRDX	OG0001974	ENSFOKG00000007059.2
Andrenidae	Andrena trimmerana	PRDX	OG0001986	ENSFOKG00000010842.2
Andrenidae	Andrena trimmerana	PRDX	OG0002022	ENSFOKG00000010439.2
Andrenidae	Andrena trimmerana	PRDX	OG0004270	ENSFOKG00000013197.1
Andrenidae	Andrena trimmerana	PRDX	OG0004336	ENSFOKG00000001028.2
Andrenidae	Andrena trimmerana	PRDX	OG0004664	ENSFOKG00000001148.2
Andrenidae	Andrena trimmerana	PRDX	OG0005353	ENSFOKG00000010080.2
Andrenidae	Andrena trimmerana	PRDX	OG0005561	ENSFOKG00000007140.2
Andrenidae	Andrena trimmerana	PRDX	OG0006684	ENSFOKG00000010293.2
Andrenidae	Andrena trimmerana	REL	OG0000812	ENSFOKG00000010225.2
Andrenidae	Andrena trimmerana	REL	OG0003522	ENSFOKG00000002325.2
Andrenidae	Andrena trimmerana	SCR	OG0000321	ENSFOKG00000001944.2
Andrenidae	Andrena trimmerana	SCR	OG0000431	ENSFOKG00000010641.2
Andrenidae	Andrena trimmerana	SCR	OG0000984	ENSFOKG00000009690.2
Andrenidae	Andrena trimmerana	SCR	OG0001434	ENSFOKG00000003908.2
Andrenidae	Andrena trimmerana	SCR	OG0002021	ENSFOKG00000009283.2
Andrenidae	Andrena trimmerana	SCR	OG0002535	ENSFOKG00000005584.2
Andrenidae	Andrena trimmerana	SCR	OG0002620	ENSFOKG00000009242.2
Andrenidae	Andrena trimmerana	SCR	OG0003366	ENSFOKG00000002867.2
Andrenidae	Andrena trimmerana	SCR	OG0003844	ENSFOKG00000010712.2
Andrenidae	Andrena trimmerana	SCR	OG0004910	ENSFOKG00000001182.2
Andrenidae	Andrena trimmerana	SCR	OG0006301	ENSFOKG00000010698.2
Andrenidae	Andrena trimmerana	SCR	OG0006498	ENSFOKG00000003545.2
Andrenidae	Andrena trimmerana	SOD	OG0000245	ENSFOKG00000010446.2
Andrenidae	Andrena trimmerana	SOD	OG0000245	ENSFOKG00000011151.2
Andrenidae	Andrena trimmerana	SPZ	OG0000086	ENSFOKG00000000506.2
Andrenidae	Andrena trimmerana	SPZ	OG0000086	ENSFOKG00000003992.2
Andrenidae	Andrena trimmerana	SPZ	OG0000086	ENSFOKG00000004436.2
Andrenidae	Andrena trimmerana	SPZ	OG0000409	ENSFOKG00000000126.2
Andrenidae	Andrena trimmerana	SPZ	OG0000409	ENSFOKG00000000933.2
Andrenidae	Andrena trimmerana	SPZ	OG0002737	ENSFOKG00000003252.2
Andrenidae	Andrena trimmerana	SPZ	OG0004631	ENSFOKG00000007185.2
Andrenidae	Andrena trimmerana	SPZ	OG0007508	ENSFOKG00000003984.2
Andrenidae	Andrena trimmerana	SRPN	OG0000122	ENSFOKG00000004511.2
Andrenidae	Andrena trimmerana	SRPN	OG0000122	ENSFOKG00000005366.2
Andrenidae	Andrena trimmerana	SRPN	OG0000122	ENSFOKG00000006561.2
Andrenidae	Andrena trimmerana	SRPN	OG0000122	ENSFOKG00000007968.2
Andrenidae	Andrena trimmerana	SRPN	OG0000122	ENSFOKG00000008005.2
Andrenidae	Andrena trimmerana	SRPN	OG0001063	ENSFOKG00000013762.1
Andrenidae	Andrena trimmerana	SRPN	OG0001590	ENSFOKG00000008211.2
Andrenidae	Andrena trimmerana	SRPN	OG0001714	ENSFOKG00000007164.2
Andrenidae	Andrena trimmerana	SRPN	OG0004321	ENSFOKG00000010945.2
Andrenidae	Andrena trimmerana	SRRP	OG0000178	ENSFOKG00000006268.2
Andrenidae	Andrena trimmerana	SRRP	OG0000178	ENSFOKG00000006711.2
Andrenidae	Andrena trimmerana	SRRP	OG0000190	ENSFOKG00000009226.2
Andrenidae	Andrena trimmerana	SRRP	OG0000190	ENSFOKG00000010101.2
Andrenidae	Andrena trimmerana	SRRP	OG0000757	ENSFOKG00000004345.2
Andrenidae	Andrena trimmerana	SRRP	OG0000757	ENSFOKG00000006281.2
Andrenidae	Andrena trimmerana	SRRP	OG0000905	ENSFOKG00000008109.2
Andrenidae	Andrena trimmerana	SRRP	OG0000905	ENSFOKG00000009132.2
Andrenidae	Andrena trimmerana	SRRP	OG0001417	ENSFOKG00000004089.2
Andrenidae	Andrena trimmerana	SRRP	OG0001672	ENSFOKG00000005210.2
Andrenidae	Andrena trimmerana	SRRP	OG0001984	ENSFOKG00000008755.2
Andrenidae	Andrena trimmerana	SRRP	OG0001998	ENSFOKG00000009492.2
Andrenidae	Andrena trimmerana	SRRP	OG0002044	ENSFOKG00000004382.2
Andrenidae	Andrena trimmerana	SRRP	OG0002165	ENSFOKG00000002604.2
Andrenidae	Andrena trimmerana	SRRP	OG0002220	ENSFOKG00000005266.2
Andrenidae	Andrena trimmerana	SRRP	OG0002344	ENSFOKG00000006401.2
Andrenidae	Andrena trimmerana	SRRP	OG0002370	ENSFOKG00000001662.2
Andrenidae	Andrena trimmerana	SRRP	OG0002466	ENSFOKG00000003122.2
Andrenidae	Andrena trimmerana	SRRP	OG0002592	ENSFOKG00000010019.2
Andrenidae	Andrena trimmerana	SRRP	OG0003358	ENSFOKG00000007594.2
Andrenidae	Andrena trimmerana	SRRP	OG0003433	ENSFOKG00000003109.2
Andrenidae	Andrena trimmerana	SRRP	OG0003566	ENSFOKG00000002598.2
Andrenidae	Andrena trimmerana	SRRP	OG0003841	ENSFOKG00000009396.2
Andrenidae	Andrena trimmerana	SRRP	OG0004198	ENSFOKG00000005759.2
Andrenidae	Andrena trimmerana	SRRP	OG0004356	ENSFOKG00000004098.2
Andrenidae	Andrena trimmerana	SRRP	OG0004686	ENSFOKG00000005235.2
Andrenidae	Andrena trimmerana	SRRP	OG0004768	ENSFOKG00000002361.2
Andrenidae	Andrena trimmerana	SRRP	OG0005922	ENSFOKG00000008969.2
Andrenidae	Andrena trimmerana	SRRP	OG0006338	ENSFOKG00000006541.2
Andrenidae	Andrena trimmerana	SRRP	OG0007357	ENSFOKG00000010651.2
Andrenidae	Andrena trimmerana	TEP	OG0002197	ENSFOKG00000006231.2
Andrenidae	Andrena trimmerana	TEP	OG0003051	ENSFOKG00000007255.2
Andrenidae	Andrena trimmerana	TEP	OG0004656	ENSFOKG00000002077.2
Andrenidae	Andrena trimmerana	TOLL	OG0001398	ENSFOKG00000010440.2
Andrenidae	Andrena trimmerana	TOLL	OG0001682	ENSFOKG00000000582.2
Andrenidae	Andrena trimmerana	TOLL	OG0001682	ENSFOKG00000003623.2
Andrenidae	Andrena trimmerana	TOLL	OG0002313	ENSFOKG00000001003.2
Andrenidae	Andrena trimmerana	TOLL	OG0003414	ENSFOKG00000003044.2
Andrenidae	Andrena trimmerana	TOLL	OG0003660	ENSFOKG00000000828.2
Andrenidae	Andrena trimmerana	TOLL	OG0004590	ENSFOKG00000001894.2
Andrenidae	Andrena trimmerana	TOLL	OG0004619	ENSFOKG00000008727.2
Andrenidae	Andrena trimmerana	TOLL	OG0007017	ENSFOKG00000002073.2
Andrenidae	Andrena trimmerana	TOLL	OG0007609	ENSFOKG00000011356.2
Apidae	Anthophora plumipes	AMP	OG0000327	ENSHQCG00000001938.1
Apidae	Anthophora plumipes	AMP	OG0001334	ENSHQCG00000004360.1
Apidae	Anthophora plumipes	APHAG	OG0002446	ENSHQCG00000011092.1
Apidae	Anthophora plumipes	APHAG	OG0003831	ENSHQCG00000004152.1
Apidae	Anthophora plumipes	APHAG	OG0003933	ENSHQCG00000004701.1
Apidae	Anthophora plumipes	APHAG	OG0004139	ENSHQCG00000002249.1
Apidae	Anthophora plumipes	APHAG	OG0004673	ENSHQCG00000001731.1
Apidae	Anthophora plumipes	APHAG	OG0004786	ENSHQCG00000002439.1
Apidae	Anthophora plumipes	APHAG	OG0004829	ENSHQCG00000001129.1
Apidae	Anthophora plumipes	APHAG	OG0004829	ENSHQCG00000001235.1
Apidae	Anthophora plumipes	APHAG	OG0005197	ENSHQCG00000009720.1
Apidae	Anthophora plumipes	APHAG	OG0005491	ENSHQCG00000004615.1
Apidae	Anthophora plumipes	APHAG	OG0005702	ENSHQCG00000002699.1
Apidae	Anthophora plumipes	APHAG	OG0005834	ENSHQCG00000008034.1
Apidae	Anthophora plumipes	APHAG	OG0005983	ENSHQCG00000000343.1
Apidae	Anthophora plumipes	APHAG	OG0006450	ENSHQCG00000009662.1
Apidae	Anthophora plumipes	APHAG	OG0006519	ENSHQCG00000009306.1
Apidae	Anthophora plumipes	APHAG	OG0006769	ENSHQCG00000009742.1
Apidae	Anthophora plumipes	APHAG	OG0006880	ENSHQCG00000002495.1
Apidae	Anthophora plumipes	ARK	OG0001701	ENSHQCG00000001586.1
Apidae	Anthophora plumipes	CASP	OG0000247	ENSHQCG00000003242.1
Apidae	Anthophora plumipes	CASP	OG0000247	ENSHQCG00000008119.1
Apidae	Anthophora plumipes	CASP	OG0002045	ENSHQCG00000000847.1
Apidae	Anthophora plumipes	CASP	OG0002713	ENSHQCG00000005506.1
Apidae	Anthophora plumipes	CASP	OG0003548	ENSHQCG00000000437.1
Apidae	Anthophora plumipes	CAT	OG0002400	ENSHQCG00000003665.1
Apidae	Anthophora plumipes	CLIP	OG0000100	ENSHQCG00000004724.1
Apidae	Anthophora plumipes	CLIP	OG0000489	ENSHQCG00000002334.1
Apidae	Anthophora plumipes	CLIP	OG0000857	ENSHQCG00000010429.1
Apidae	Anthophora plumipes	CLIP	OG0001104	ENSHQCG00000007627.1
Apidae	Anthophora plumipes	CLIP	OG0001286	ENSHQCG00000008370.1
Apidae	Anthophora plumipes	CLIP	OG0001530	ENSHQCG00000007125.1
Apidae	Anthophora plumipes	CLIP	OG0003918	ENSHQCG00000006797.1
Apidae	Anthophora plumipes	CLIP	OG0003952	ENSHQCG00000005767.1
Apidae	Anthophora plumipes	CLIP	OG0004548	ENSHQCG00000005642.1
Apidae	Anthophora plumipes	CLIP	OG0005173	ENSHQCG00000005931.1
Apidae	Anthophora plumipes	CLIP	OG0005417	ENSHQCG00000006969.1
Apidae	Anthophora plumipes	CLIP	OG0005447	ENSHQCG00000006111.1
Apidae	Anthophora plumipes	CLIP	OG0005762	ENSHQCG00000009137.1
Apidae	Anthophora plumipes	CLIP	OG0006967	ENSHQCG00000007719.1
Apidae	Anthophora plumipes	CLIP	OG0007332	ENSHQCG00000009684.1
Apidae	Anthophora plumipes	CLIP	OG0007742	ENSHQCG00000005053.1
Apidae	Anthophora plumipes	CTL	OG0001740	ENSHQCG00000003551.1
Apidae	Anthophora plumipes	CTL	OG0001823	ENSHQCG00000010228.1
Apidae	Anthophora plumipes	CTL	OG0003176	ENSHQCG00000009387.1
Apidae	Anthophora plumipes	CTL	OG0004881	ENSHQCG00000008148.1
Apidae	Anthophora plumipes	CTL	OG0005639	ENSHQCG00000007723.1
Apidae	Anthophora plumipes	CTL	OG0005791	ENSHQCG00000010741.1
Apidae	Anthophora plumipes	CTL	OG0006335	ENSHQCG00000006497.1
Apidae	Anthophora plumipes	CTL	OG0006524	ENSHQCG00000000609.1
Apidae	Anthophora plumipes	CTL	OG0006792	ENSHQCG00000001566.1
Apidae	Anthophora plumipes	CTL	OG0008136	ENSHQCG00000009578.1
Apidae	Anthophora plumipes	FREP	OG0000388	ENSHQCG00000009100.1
Apidae	Anthophora plumipes	FREP	OG0000388	ENSHQCG00000009770.1
Apidae	Anthophora plumipes	FREP	OG0001750	ENSHQCG00000003232.1
Apidae	Anthophora plumipes	GALE	OG0003190	ENSHQCG00000007837.1
Apidae	Anthophora plumipes	GALE	OG0004011	ENSHQCG00000010174.1
Apidae	Anthophora plumipes	GALE	OG0006683	ENSHQCG00000006210.1
Apidae	Anthophora plumipes	GNBP	OG0000914	ENSHQCG00000006455.1
Apidae	Anthophora plumipes	GNBP	OG0001694	ENSHQCG00000006396.1
Apidae	Anthophora plumipes	IAP	OG0000199	ENSHQCG00000003507.1
Apidae	Anthophora plumipes	IAP	OG0003978	ENSHQCG00000004604.1
Apidae	Anthophora plumipes	IAP	OG0004007	ENSHQCG00000011009.1
Apidae	Anthophora plumipes	IGG	OG0000504	ENSHQCG00000004354.1
Apidae	Anthophora plumipes	IGG	OG0000504	ENSHQCG00000004781.1
Apidae	Anthophora plumipes	IGG	OG0000512	ENSHQCG00000001687.1
Apidae	Anthophora plumipes	IMD	OG0000611	ENSHQCG00000004675.1
Apidae	Anthophora plumipes	IMD	OG0000611	ENSHQCG00000007361.1
Apidae	Anthophora plumipes	IMD	OG0003945	ENSHQCG00000004571.1
Apidae	Anthophora plumipes	IMD	OG0005010	ENSHQCG00000004263.1
Apidae	Anthophora plumipes	IMD	OG0006148	ENSHQCG00000001117.1
Apidae	Anthophora plumipes	IMD	OG0006188	ENSHQCG00000003678.1
Apidae	Anthophora plumipes	IMD	OG0006444	ENSHQCG00000008017.1
Apidae	Anthophora plumipes	IMD	OG0008396	ENSHQCG00000007690.1
Apidae	Anthophora plumipes	JAST	OG0002385	ENSHQCG00000003137.1
Apidae	Anthophora plumipes	JAST	OG0002504	ENSHQCG00000008045.1
Apidae	Anthophora plumipes	JAST	OG0002998	ENSHQCG00000006599.1
Apidae	Anthophora plumipes	ML	OG0001994	ENSHQCG00000006967.1
Apidae	Anthophora plumipes	ML	OG0002469	ENSHQCG00000007605.1
Apidae	Anthophora plumipes	ML	OG0008465	ENSHQCG00000008512.1
Apidae	Anthophora plumipes	ML	OG0008732	ENSHQCG00000003572.1
Apidae	Anthophora plumipes	NIM	OG0000346	ENSHQCG00000007152.1
Apidae	Anthophora plumipes	NIM	OG0002945	ENSHQCG00000008326.1
Apidae	Anthophora plumipes	NIM	OG0008120	ENSHQCG00000005272.1
Apidae	Anthophora plumipes	PGRP	OG0000398	ENSHQCG00000004567.1
Apidae	Anthophora plumipes	PGRP	OG0000398	ENSHQCG00000004796.1
Apidae	Anthophora plumipes	PGRP	OG0001034	ENSHQCG00000009829.1
Apidae	Anthophora plumipes	PGRP	OG0001352	ENSHQCG00000005478.1
Apidae	Anthophora plumipes	PPO	OG0000644	ENSHQCG00000010675.1
Apidae	Anthophora plumipes	PRDX	OG0000204	ENSHQCG00000000591.1
Apidae	Anthophora plumipes	PRDX	OG0000204	ENSHQCG00000005046.1
Apidae	Anthophora plumipes	PRDX	OG0000339	ENSHQCG00000009491.1
Apidae	Anthophora plumipes	PRDX	OG0000339	ENSHQCG00000010835.1
Apidae	Anthophora plumipes	PRDX	OG0001974	ENSHQCG00000010626.1
Apidae	Anthophora plumipes	PRDX	OG0001986	ENSHQCG00000009497.1
Apidae	Anthophora plumipes	PRDX	OG0002022	ENSHQCG00000005472.1
Apidae	Anthophora plumipes	PRDX	OG0004270	ENSHQCG00000010141.1
Apidae	Anthophora plumipes	PRDX	OG0004336	ENSHQCG00000002018.1
Apidae	Anthophora plumipes	PRDX	OG0004664	ENSHQCG00000001410.1
Apidae	Anthophora plumipes	PRDX	OG0005353	ENSHQCG00000005418.1
Apidae	Anthophora plumipes	PRDX	OG0005561	ENSHQCG00000010098.1
Apidae	Anthophora plumipes	PRDX	OG0006684	ENSHQCG00000004713.1
Apidae	Anthophora plumipes	REL	OG0000812	ENSHQCG00000004748.1
Apidae	Anthophora plumipes	REL	OG0003522	ENSHQCG00000001428.1
Apidae	Anthophora plumipes	SCR	OG0000321	ENSHQCG00000001288.1
Apidae	Anthophora plumipes	SCR	OG0000431	ENSHQCG00000005135.1
Apidae	Anthophora plumipes	SCR	OG0000984	ENSHQCG00000004756.1
Apidae	Anthophora plumipes	SCR	OG0001434	ENSHQCG00000008408.1
Apidae	Anthophora plumipes	SCR	OG0002021	ENSHQCG00000004800.1
Apidae	Anthophora plumipes	SCR	OG0002535	ENSHQCG00000004674.1
Apidae	Anthophora plumipes	SCR	OG0002620	ENSHQCG00000011146.1
Apidae	Anthophora plumipes	SCR	OG0003366	ENSHQCG00000003275.1
Apidae	Anthophora plumipes	SCR	OG0003844	ENSHQCG00000008142.1
Apidae	Anthophora plumipes	SCR	OG0004910	ENSHQCG00000004002.1
Apidae	Anthophora plumipes	SCR	OG0006301	ENSHQCG00000004323.1
Apidae	Anthophora plumipes	SCR	OG0006498	ENSHQCG00000002874.1
Apidae	Anthophora plumipes	SOD	OG0000245	ENSHQCG00000010090.1
Apidae	Anthophora plumipes	SOD	OG0000245	ENSHQCG00000010913.1
Apidae	Anthophora plumipes	SPZ	OG0000086	ENSHQCG00000004502.1
Apidae	Anthophora plumipes	SPZ	OG0000086	ENSHQCG00000008546.1
Apidae	Anthophora plumipes	SPZ	OG0000409	ENSHQCG00000004969.1
Apidae	Anthophora plumipes	SPZ	OG0000409	ENSHQCG00000005197.1
Apidae	Anthophora plumipes	SPZ	OG0002737	ENSHQCG00000011136.1
Apidae	Anthophora plumipes	SPZ	OG0004631	ENSHQCG00000009804.1
Apidae	Anthophora plumipes	SPZ	OG0007508	ENSHQCG00000003293.1
Apidae	Anthophora plumipes	SRPN	OG0000122	ENSHQCG00000004344.1
Apidae	Anthophora plumipes	SRPN	OG0001063	ENSHQCG00000004902.1
Apidae	Anthophora plumipes	SRPN	OG0001063	ENSHQCG00000005649.1
Apidae	Anthophora plumipes	SRPN	OG0001356	ENSHQCG00000008162.1
Apidae	Anthophora plumipes	SRPN	OG0001590	ENSHQCG00000001199.1
Apidae	Anthophora plumipes	SRPN	OG0001714	ENSHQCG00000010779.1
Apidae	Anthophora plumipes	SRPN	OG0004321	ENSHQCG00000008340.1
Apidae	Anthophora plumipes	SRPN	OG0007947	ENSHQCG00000006236.1
Apidae	Anthophora plumipes	SRRP	OG0000178	ENSHQCG00000001720.1
Apidae	Anthophora plumipes	SRRP	OG0000178	ENSHQCG00000003281.1
Apidae	Anthophora plumipes	SRRP	OG0000190	ENSHQCG00000001269.1
Apidae	Anthophora plumipes	SRRP	OG0000757	ENSHQCG00000007776.1
Apidae	Anthophora plumipes	SRRP	OG0000905	ENSHQCG00000000876.1
Apidae	Anthophora plumipes	SRRP	OG0001417	ENSHQCG00000007481.1
Apidae	Anthophora plumipes	SRRP	OG0001672	ENSHQCG00000007471.1
Apidae	Anthophora plumipes	SRRP	OG0001984	ENSHQCG00000009351.1
Apidae	Anthophora plumipes	SRRP	OG0001998	ENSHQCG00000004559.1
Apidae	Anthophora plumipes	SRRP	OG0001998	ENSHQCG00000009244.1
Apidae	Anthophora plumipes	SRRP	OG0002044	ENSHQCG00000000127.1
Apidae	Anthophora plumipes	SRRP	OG0002165	ENSHQCG00000006189.1
Apidae	Anthophora plumipes	SRRP	OG0002220	ENSHQCG00000009822.1
Apidae	Anthophora plumipes	SRRP	OG0002344	ENSHQCG00000002896.1
Apidae	Anthophora plumipes	SRRP	OG0002370	ENSHQCG00000006082.1
Apidae	Anthophora plumipes	SRRP	OG0002466	ENSHQCG00000007631.1
Apidae	Anthophora plumipes	SRRP	OG0002592	ENSHQCG00000010192.1
Apidae	Anthophora plumipes	SRRP	OG0003358	ENSHQCG00000009319.1
Apidae	Anthophora plumipes	SRRP	OG0003433	ENSHQCG00000008870.1
Apidae	Anthophora plumipes	SRRP	OG0003566	ENSHQCG00000005482.1
Apidae	Anthophora plumipes	SRRP	OG0003841	ENSHQCG00000005080.1
Apidae	Anthophora plumipes	SRRP	OG0004198	ENSHQCG00000009109.1
Apidae	Anthophora plumipes	SRRP	OG0004356	ENSHQCG00000001643.1
Apidae	Anthophora plumipes	SRRP	OG0004686	ENSHQCG00000010017.1
Apidae	Anthophora plumipes	SRRP	OG0004768	ENSHQCG00000009739.1
Apidae	Anthophora plumipes	SRRP	OG0005922	ENSHQCG00000009224.1
Apidae	Anthophora plumipes	SRRP	OG0006338	ENSHQCG00000009342.1
Apidae	Anthophora plumipes	SRRP	OG0007357	ENSHQCG00000010477.1
Apidae	Anthophora plumipes	TEP	OG0002197	ENSHQCG00000009830.1
Apidae	Anthophora plumipes	TEP	OG0003051	ENSHQCG00000005893.1
Apidae	Anthophora plumipes	TEP	OG0004656	ENSHQCG00000002744.1
Apidae	Anthophora plumipes	TOLL	OG0001398	ENSHQCG00000007360.1
Apidae	Anthophora plumipes	TOLL	OG0001682	ENSHQCG00000000772.1
Apidae	Anthophora plumipes	TOLL	OG0002313	ENSHQCG00000002361.1
Apidae	Anthophora plumipes	TOLL	OG0003414	ENSHQCG00000007974.1
Apidae	Anthophora plumipes	TOLL	OG0003660	ENSHQCG00000006925.1
Apidae	Anthophora plumipes	TOLL	OG0004590	ENSHQCG00000005426.1
Apidae	Anthophora plumipes	TOLL	OG0004619	ENSHQCG00000010653.1
Apidae	Anthophora plumipes	TOLL	OG0007017	ENSHQCG00000000808.1
Apidae	Anthophora plumipes	TOLL	OG0007609	ENSHQCG00000009286.1
Apidae	Apis dorsata	AMP	OG0000327	LOC102672730
Apidae	Apis dorsata	AMP	OG0000327	LOC102675783
Apidae	Apis dorsata	AMP	OG0001334	LOC102672073
Apidae	Apis dorsata	AMP	OG0009501	LOC102678490
Apidae	Apis dorsata	APHAG	OG0002446	LOC102675417
Apidae	Apis dorsata	APHAG	OG0003831	LOC102673422
Apidae	Apis dorsata	APHAG	OG0003933	LOC102677226
Apidae	Apis dorsata	APHAG	OG0004139	LOC102678698
Apidae	Apis dorsata	APHAG	OG0004673	LOC102675001
Apidae	Apis dorsata	APHAG	OG0004786	LOC102672257
Apidae	Apis dorsata	APHAG	OG0004829	LOC102681506
Apidae	Apis dorsata	APHAG	OG0005197	LOC102672412
Apidae	Apis dorsata	APHAG	OG0005491	LOC102672118
Apidae	Apis dorsata	APHAG	OG0005702	LOC102673355
Apidae	Apis dorsata	APHAG	OG0005834	LOC102673892
Apidae	Apis dorsata	APHAG	OG0005983	LOC102673190
Apidae	Apis dorsata	APHAG	OG0006450	LOC102680007
Apidae	Apis dorsata	APHAG	OG0006519	LOC102679749
Apidae	Apis dorsata	APHAG	OG0006769	LOC102674459
Apidae	Apis dorsata	APHAG	OG0006880	LOC102681791
Apidae	Apis dorsata	ARK	OG0001701	LOC102681002
Apidae	Apis dorsata	CASP	OG0000247	LOC102676842
Apidae	Apis dorsata	CASP	OG0002045	LOC102671457
Apidae	Apis dorsata	CASP	OG0002713	LOC102672349
Apidae	Apis dorsata	CASP	OG0003548	LOC102672168
Apidae	Apis dorsata	CAT	OG0002400	LOC102672863
Apidae	Apis dorsata	CLIP	OG0000100	LOC102680743
Apidae	Apis dorsata	CLIP	OG0000489	LOC102671750
Apidae	Apis dorsata	CLIP	OG0000857	LOC102672903
Apidae	Apis dorsata	CLIP	OG0001104	LOC102670849
Apidae	Apis dorsata	CLIP	OG0001286	LOC102680105
Apidae	Apis dorsata	CLIP	OG0001530	LOC102681132
Apidae	Apis dorsata	CLIP	OG0003918	LOC102673473
Apidae	Apis dorsata	CLIP	OG0003952	LOC102680013
Apidae	Apis dorsata	CLIP	OG0004548	LOC102671074
Apidae	Apis dorsata	CLIP	OG0005173	LOC102678147
Apidae	Apis dorsata	CLIP	OG0005417	LOC102679317
Apidae	Apis dorsata	CLIP	OG0005447	LOC102670831
Apidae	Apis dorsata	CLIP	OG0005762	LOC102676508
Apidae	Apis dorsata	CLIP	OG0006813	LOC102680695
Apidae	Apis dorsata	CLIP	OG0006967	LOC102680946
Apidae	Apis dorsata	CLIP	OG0007742	LOC102681138
Apidae	Apis dorsata	CTL	OG0001740	LOC102675222
Apidae	Apis dorsata	CTL	OG0001823	LOC102673834
Apidae	Apis dorsata	CTL	OG0003176	LOC102672504
Apidae	Apis dorsata	CTL	OG0004881	LOC102672958
Apidae	Apis dorsata	CTL	OG0005639	LOC102673704
Apidae	Apis dorsata	CTL	OG0005791	LOC102680844
Apidae	Apis dorsata	CTL	OG0006335	LOC102674755
Apidae	Apis dorsata	CTL	OG0006524	LOC102672001
Apidae	Apis dorsata	CTL	OG0006792	LOC102681786
Apidae	Apis dorsata	CTL	OG0008136	LOC102676736
Apidae	Apis dorsata	FREP	OG0000388	LOC102676916
Apidae	Apis dorsata	FREP	OG0000388	LOC102679110
Apidae	Apis dorsata	FREP	OG0001750	LOC102674832
Apidae	Apis dorsata	GALE	OG0003190	LOC102674327
Apidae	Apis dorsata	GALE	OG0004011	LOC102676303
Apidae	Apis dorsata	GALE	OG0006683	LOC102678712
Apidae	Apis dorsata	GNBP	OG0000914	LOC102680639
Apidae	Apis dorsata	GNBP	OG0001694	LOC102675591
Apidae	Apis dorsata	IAP	OG0000199	LOC102673264
Apidae	Apis dorsata	IAP	OG0000199	LOC102679132
Apidae	Apis dorsata	IAP	OG0003978	LOC102672739
Apidae	Apis dorsata	IAP	OG0004007	LOC102681259
Apidae	Apis dorsata	IGG	OG0000504	LOC102672401
Apidae	Apis dorsata	IGG	OG0000512	LOC102675478
Apidae	Apis dorsata	IMD	OG0000611	LOC102676751
Apidae	Apis dorsata	IMD	OG0003945	LOC102672124
Apidae	Apis dorsata	IMD	OG0005010	LOC102679302
Apidae	Apis dorsata	IMD	OG0006148	LOC102672418
Apidae	Apis dorsata	IMD	OG0006188	LOC102676057
Apidae	Apis dorsata	IMD	OG0006444	LOC116186596
Apidae	Apis dorsata	IMD	OG0008396	LOC116185330
Apidae	Apis dorsata	JAST	OG0002385	LOC102671236
Apidae	Apis dorsata	JAST	OG0002504	LOC102679256
Apidae	Apis dorsata	JAST	OG0002998	LOC102673881
Apidae	Apis dorsata	LYS	OG0007140	LOC102675258
Apidae	Apis dorsata	LYS	OG0007140	LOC116186805
Apidae	Apis dorsata	ML	OG0001994	LOC102678102
Apidae	Apis dorsata	ML	OG0002469	LOC102673249
Apidae	Apis dorsata	ML	OG0008465	LOC102678348
Apidae	Apis dorsata	ML	OG0008732	LOC102681359
Apidae	Apis dorsata	NIM	OG0000346	LOC102679633
Apidae	Apis dorsata	NIM	OG0002945	LOC102675532
Apidae	Apis dorsata	PGRP	OG0000398	LOC102679736
Apidae	Apis dorsata	PGRP	OG0000398	LOC116185462
Apidae	Apis dorsata	PGRP	OG0001034	LOC102672072
Apidae	Apis dorsata	PGRP	OG0001352	LOC102677229
Apidae	Apis dorsata	PPO	OG0000644	LOC102675597
Apidae	Apis dorsata	PRDX	OG0000204	LOC102674260
Apidae	Apis dorsata	PRDX	OG0000204	LOC102681464
Apidae	Apis dorsata	PRDX	OG0000339	LOC102674728
Apidae	Apis dorsata	PRDX	OG0000339	LOC102676898
Apidae	Apis dorsata	PRDX	OG0001974	LOC102677539
Apidae	Apis dorsata	PRDX	OG0001986	LOC102679778
Apidae	Apis dorsata	PRDX	OG0002022	LOC102679559
Apidae	Apis dorsata	PRDX	OG0004270	LOC102671481
Apidae	Apis dorsata	PRDX	OG0004336	LOC102679095
Apidae	Apis dorsata	PRDX	OG0004664	LOC102672292
Apidae	Apis dorsata	PRDX	OG0005561	LOC102676982
Apidae	Apis dorsata	PRDX	OG0006684	LOC102673887
Apidae	Apis dorsata	REL	OG0000812	LOC102679069
Apidae	Apis dorsata	REL	OG0000812	LOC102680480
Apidae	Apis dorsata	REL	OG0003522	LOC102675208
Apidae	Apis dorsata	SCR	OG0000321	LOC102680683
Apidae	Apis dorsata	SCR	OG0000321	LOC102680826
Apidae	Apis dorsata	SCR	OG0000431	LOC102678288
Apidae	Apis dorsata	SCR	OG0000431	LOC102678438
Apidae	Apis dorsata	SCR	OG0000984	LOC102678715
Apidae	Apis dorsata	SCR	OG0001434	LOC102675854
Apidae	Apis dorsata	SCR	OG0002021	LOC102674590
Apidae	Apis dorsata	SCR	OG0002535	LOC102670649
Apidae	Apis dorsata	SCR	OG0002535	LOC102681387
Apidae	Apis dorsata	SCR	OG0002620	LOC102678397
Apidae	Apis dorsata	SCR	OG0003366	LOC102677103
Apidae	Apis dorsata	SCR	OG0003844	LOC102679142
Apidae	Apis dorsata	SCR	OG0004910	LOC102681673
Apidae	Apis dorsata	SCR	OG0006301	LOC102675370
Apidae	Apis dorsata	SCR	OG0006498	LOC102672646
Apidae	Apis dorsata	SCR	OG0007701	LOC102677920
Apidae	Apis dorsata	SOD	OG0000245	LOC102678638
Apidae	Apis dorsata	SOD	OG0000245	LOC102680225
Apidae	Apis dorsata	SPZ	OG0000086	LOC102672304
Apidae	Apis dorsata	SPZ	OG0000086	LOC102679652
Apidae	Apis dorsata	SPZ	OG0000409	LOC102678492
Apidae	Apis dorsata	SPZ	OG0002737	LOC102674132
Apidae	Apis dorsata	SPZ	OG0004631	LOC102670581
Apidae	Apis dorsata	SPZ	OG0007508	LOC102679934
Apidae	Apis dorsata	SRPN	OG0000122	LOC102679887
Apidae	Apis dorsata	SRPN	OG0001063	LOC102674632
Apidae	Apis dorsata	SRPN	OG0001356	LOC102678858
Apidae	Apis dorsata	SRPN	OG0001590	LOC102672634
Apidae	Apis dorsata	SRPN	OG0001714	LOC102674942
Apidae	Apis dorsata	SRPN	OG0004321	LOC102677793
Apidae	Apis dorsata	SRPN	OG0007947	LOC102680649
Apidae	Apis dorsata	SRRP	OG0000178	LOC102673632
Apidae	Apis dorsata	SRRP	OG0000178	LOC102679439
Apidae	Apis dorsata	SRRP	OG0000190	LOC102671498
Apidae	Apis dorsata	SRRP	OG0000190	LOC102671632
Apidae	Apis dorsata	SRRP	OG0000757	LOC102673963
Apidae	Apis dorsata	SRRP	OG0000905	LOC102672512
Apidae	Apis dorsata	SRRP	OG0001417	LOC102671554
Apidae	Apis dorsata	SRRP	OG0001672	LOC102674194
Apidae	Apis dorsata	SRRP	OG0001984	LOC102674350
Apidae	Apis dorsata	SRRP	OG0001998	LOC102677775
Apidae	Apis dorsata	SRRP	OG0002044	LOC102675971
Apidae	Apis dorsata	SRRP	OG0002165	LOC102679418
Apidae	Apis dorsata	SRRP	OG0002220	LOC102675505
Apidae	Apis dorsata	SRRP	OG0002344	LOC102676873
Apidae	Apis dorsata	SRRP	OG0002370	LOC102672589
Apidae	Apis dorsata	SRRP	OG0002466	LOC102679835
Apidae	Apis dorsata	SRRP	OG0002592	LOC102679803
Apidae	Apis dorsata	SRRP	OG0003358	LOC102681873
Apidae	Apis dorsata	SRRP	OG0003433	LOC102676027
Apidae	Apis dorsata	SRRP	OG0003566	LOC102674301
Apidae	Apis dorsata	SRRP	OG0003841	LOC102674843
Apidae	Apis dorsata	SRRP	OG0003841	LOC102676909
Apidae	Apis dorsata	SRRP	OG0004198	LOC102675176
Apidae	Apis dorsata	SRRP	OG0004356	LOC102677348
Apidae	Apis dorsata	SRRP	OG0004686	LOC102680665
Apidae	Apis dorsata	SRRP	OG0004768	LOC102671165
Apidae	Apis dorsata	SRRP	OG0005922	LOC102672071
Apidae	Apis dorsata	SRRP	OG0006338	LOC102680221
Apidae	Apis dorsata	SRRP	OG0007357	LOC102676862
Apidae	Apis dorsata	TEP	OG0002197	LOC102672856
Apidae	Apis dorsata	TEP	OG0003051	LOC102677445
Apidae	Apis dorsata	TEP	OG0004656	LOC102673619
Apidae	Apis dorsata	TOLL	OG0001398	LOC102680082
Apidae	Apis dorsata	TOLL	OG0001682	LOC102671972
Apidae	Apis dorsata	TOLL	OG0002313	LOC102678534
Apidae	Apis dorsata	TOLL	OG0003414	LOC102676774
Apidae	Apis dorsata	TOLL	OG0003660	LOC102676551
Apidae	Apis dorsata	TOLL	OG0004590	LOC102681595
Apidae	Apis dorsata	TOLL	OG0004619	LOC102672353
Apidae	Apis dorsata	TOLL	OG0007017	LOC102674341
Apidae	Apis dorsata	TOLL	OG0007609	LOC102679430
Apidae	Apis florea	AMP	OG0000327	LOC100867071
Apidae	Apis florea	AMP	OG0000327	LOC100868088
Apidae	Apis florea	AMP	OG0001334	LOC100867876
Apidae	Apis florea	AMP	OG0009501	LOC100865281
Apidae	Apis florea	AMP	OG0011680	LOC100870170
Apidae	Apis florea	APHAG	OG0002446	LOC100872449
Apidae	Apis florea	APHAG	OG0003831	LOC100870997
Apidae	Apis florea	APHAG	OG0003933	LOC100867455
Apidae	Apis florea	APHAG	OG0004139	LOC100863608
Apidae	Apis florea	APHAG	OG0004673	LOC100870519
Apidae	Apis florea	APHAG	OG0004786	LOC100864169
Apidae	Apis florea	APHAG	OG0004829	LOC100868174
Apidae	Apis florea	APHAG	OG0005197	LOC100866334
Apidae	Apis florea	APHAG	OG0005491	LOC100866510
Apidae	Apis florea	APHAG	OG0005702	LOC100870787
Apidae	Apis florea	APHAG	OG0005834	LOC100863223
Apidae	Apis florea	APHAG	OG0005983	LOC100867028
Apidae	Apis florea	APHAG	OG0006450	LOC100863998
Apidae	Apis florea	APHAG	OG0006519	LOC100868607
Apidae	Apis florea	APHAG	OG0006769	LOC100868478
Apidae	Apis florea	APHAG	OG0006880	LOC100870492
Apidae	Apis florea	ARK	OG0001701	LOC100867882
Apidae	Apis florea	CASP	OG0000247	LOC100867203
Apidae	Apis florea	CASP	OG0002045	LOC100865511
Apidae	Apis florea	CASP	OG0002045	LOC105736257
Apidae	Apis florea	CASP	OG0002045	LOC105736258
Apidae	Apis florea	CASP	OG0002713	LOC100866854
Apidae	Apis florea	CASP	OG0003548	LOC100867647
Apidae	Apis florea	CAT	OG0002400	LOC100865605
Apidae	Apis florea	CLIP	OG0000100	LOC100870210
Apidae	Apis florea	CLIP	OG0000489	LOC100863343
Apidae	Apis florea	CLIP	OG0000857	LOC100872682
Apidae	Apis florea	CLIP	OG0001104	LOC100868467
Apidae	Apis florea	CLIP	OG0001286	LOC100871349
Apidae	Apis florea	CLIP	OG0001530	LOC100872792
Apidae	Apis florea	CLIP	OG0003918	LOC100872912
Apidae	Apis florea	CLIP	OG0003952	LOC100864886
Apidae	Apis florea	CLIP	OG0004548	LOC100869752
Apidae	Apis florea	CLIP	OG0005173	LOC100869093
Apidae	Apis florea	CLIP	OG0005417	LOC100871622
Apidae	Apis florea	CLIP	OG0005447	LOC100868912
Apidae	Apis florea	CLIP	OG0005762	LOC100870830
Apidae	Apis florea	CLIP	OG0006813	LOC100870275
Apidae	Apis florea	CLIP	OG0006967	LOC100863159
Apidae	Apis florea	CLIP	OG0007332	LOC100868922
Apidae	Apis florea	CLIP	OG0007742	LOC100865358
Apidae	Apis florea	CTL	OG0001740	LOC100867331
Apidae	Apis florea	CTL	OG0001823	LOC100868721
Apidae	Apis florea	CTL	OG0003176	LOC100865547
Apidae	Apis florea	CTL	OG0004881	LOC100867629
Apidae	Apis florea	CTL	OG0005639	LOC100871013
Apidae	Apis florea	CTL	OG0005791	LOC100863755
Apidae	Apis florea	CTL	OG0006335	LOC100864683
Apidae	Apis florea	CTL	OG0006524	LOC105736564
Apidae	Apis florea	CTL	OG0006792	LOC100869862
Apidae	Apis florea	CTL	OG0008136	LOC100871023
Apidae	Apis florea	FREP	OG0000388	LOC100869984
Apidae	Apis florea	FREP	OG0000388	LOC100870228
Apidae	Apis florea	FREP	OG0001750	LOC100865780
Apidae	Apis florea	GALE	OG0003190	LOC100866132
Apidae	Apis florea	GALE	OG0004011	LOC100872054
Apidae	Apis florea	GALE	OG0006683	LOC100871074
Apidae	Apis florea	GNBP	OG0000914	LOC100870215
Apidae	Apis florea	GNBP	OG0001694	LOC100867658
Apidae	Apis florea	IAP	OG0000199	LOC100871256
Apidae	Apis florea	IAP	OG0000199	LOC105736726
Apidae	Apis florea	IAP	OG0003978	LOC100866313
Apidae	Apis florea	IAP	OG0004007	LOC100868460
Apidae	Apis florea	IGG	OG0000504	LOC100866757
Apidae	Apis florea	IGG	OG0000504	LOC100870330
Apidae	Apis florea	IGG	OG0000504	LOC116414954
Apidae	Apis florea	IGG	OG0000512	LOC100865505
Apidae	Apis florea	IGG	OG0000512	LOC100866116
Apidae	Apis florea	IMD	OG0000611	LOC100866671
Apidae	Apis florea	IMD	OG0003945	LOC100863904
Apidae	Apis florea	IMD	OG0005010	LOC100869840
Apidae	Apis florea	IMD	OG0006148	LOC100864025
Apidae	Apis florea	IMD	OG0006188	LOC100872382
Apidae	Apis florea	IMD	OG0006444	LOC100864885
Apidae	Apis florea	IMD	OG0008396	LOC105736361
Apidae	Apis florea	JAST	OG0002385	LOC100872264
Apidae	Apis florea	JAST	OG0002504	LOC100866941
Apidae	Apis florea	JAST	OG0002998	LOC100864112
Apidae	Apis florea	LYS	OG0007140	LOC100868408
Apidae	Apis florea	LYS	OG0007140	LOC100868528
Apidae	Apis florea	ML	OG0001994	LOC100869454
Apidae	Apis florea	ML	OG0002469	LOC100868255
Apidae	Apis florea	ML	OG0008465	LOC100868766
Apidae	Apis florea	ML	OG0008732	LOC100867736
Apidae	Apis florea	NIM	OG0000346	LOC105736088
Apidae	Apis florea	NIM	OG0000346	LOC105736089
Apidae	Apis florea	NIM	OG0002945	LOC100867487
Apidae	Apis florea	NIM	OG0008120	LOC105736160
Apidae	Apis florea	PGRP	OG0000398	LOC100865317
Apidae	Apis florea	PGRP	OG0000398	LOC100872181
Apidae	Apis florea	PGRP	OG0001034	LOC100872726
Apidae	Apis florea	PGRP	OG0001352	LOC100869914
Apidae	Apis florea	PPO	OG0000644	LOC100870521
Apidae	Apis florea	PRDX	OG0000204	LOC100866285
Apidae	Apis florea	PRDX	OG0000204	LOC100869880
Apidae	Apis florea	PRDX	OG0000339	LOC100871306
Apidae	Apis florea	PRDX	OG0000339	LOC100872770
Apidae	Apis florea	PRDX	OG0001974	LOC100869127
Apidae	Apis florea	PRDX	OG0001986	LOC100867444
Apidae	Apis florea	PRDX	OG0001986	LOC116414499
Apidae	Apis florea	PRDX	OG0002022	LOC100871818
Apidae	Apis florea	PRDX	OG0004270	LOC100863165
Apidae	Apis florea	PRDX	OG0004336	LOC100869014
Apidae	Apis florea	PRDX	OG0004664	LOC100868463
[truncated: 13,095 more rows]

## Sheet: Table S4
Table S4: Results of tBLASTn searches for the identification of putative lysozyme homologues in bee species
Table S4: Results for a tBLASTn-based search for the presence of a lysozyme (LYS) homologue in 13 bee species where a putative homologue was missing in their respective predicted proteomes. For each alignment, the subject genome assembly, the query gene id (which was the predicted proteome from Bombus terrestris), the location of the subject best match (chromosomal scaffold/linkage group), as wel…
Subject genome assembly	Query	Chromosomal scaffold/Linkage group	Percentage of identical matches	Length	Mismatch	Gap open	Query start	Query end	Subject start	Subject end	E-value	Bitscore
Anthophora plumipes	LOC100642297	10	84.252	127	20	0	18	144	18095295	18095675	4.2e-70	232
Bombus pyrosoma	LOC100642297	LG13	98.71	155	2	0	1	155	6049078	6049542	1.02e-85	276
Bombus pyrosoma	LOC100642297	LG13	51.685	89	36	1	46	134	6054467	6054712	2.76e-19	85.9
Bombus turneri	LOC100642297	LG13	98.71	155	2	0	1	155	5843169	5843633	9.74e-86	276
Bombus turneri	LOC100642297	LG13	61.798	89	26	2	46	134	5847344	5847586	4.15e-25	102
Cerceris rybyensis	LOC100642297	10	74.219	128	33	0	18	145	4890244	4890627	1.65e-56	192
Ectemnius lituratus	LOC100642297	6	75	124	31	0	21	144	13785978	13785607	7.46e-56	190
Lasioglossum morio	LOC100642297	1	78.4	125	27	0	20	144	21372398	21372772	1.87e-65	219
Lasioglossum morio	LOC100642297	1	76.613	124	29	0	21	144	21373558	21373929	6.79e-64	214
Lasioglossum pauxillum	LOC100642297	9	80	125	25	0	20	144	452730	452356	2.32e-66	221
Lasioglossum pauxillum	LOC100642297	9	74.194	124	32	0	21	144	451441	451070	4.35e-62	209
Macropis europaea	LOC100642297	2	80	125	25	0	20	144	30311528	30311154	4.7e-68	226
Nomada flava	LOC100642297	3	84.375	128	20	0	18	145	5726098	5726481	3.39e-74	243
Nomada lathburiana	LOC100642297	3	85.938	128	18	0	18	145	82742	82359	1.33e-75	247
Nysson spinosus	LOC100642297	12	76.378	127	30	0	18	144	7232732	7233112	6.75e-66	219
Osmia bicornis	LOC100642297	14	77.778	144	32	0	1	144	4322620	4322189	3.74e-67	222
Stelis phaeoptera	LOC100642297	12	77.419	124	28	0	21	144	11889238	11888867	2.53e-64	214

## Sheet: Table S5
Table S5: Functional domain annotation of genomic regions encoding for lysozymes using Pfam
Table S5: For genomic regions encoding for putative lysozymes (LYS) in bee species identified by tBLASTn, we predicted translated the regions into six possible reading frames. We kept sequences without a terminator and then annotated them using InterProScan with the Pfam dataset to identify conserved functional domains. For each alignment, we provide the protein accession, including the species i…
Protein accession	Sequence MD5 digest	Sequence length	Analysis	Signature accession	Signature description	1. Start location	1. Stop location	e-value	Status	Date	InterPro annotations - accession	InterPro annotations - description	GO annotations with their source(s)	Pathways annotations
Bombus_pyrosoma_lys_3	b79fb731546c2eb30480dc2c4fa1b239	154	Pfam	PF00062	C-type lysozyme/alpha-lactalbumin family	25	143	1.50E-24	T	45846	IPR001916	Glycoside hydrolase, family 22	-	Reactome:R-BTA-6798695|Reactome:R-BTA-6803157|Reactome:R-CFA-6798695|Reactome:R-CFA-6803157|Reactome:R-DME-5653890|Reactome:R-GGA-5653890|Reactome:R-GGA-6798695|Reactome:R-GGA-6803157|Reactome:R-HSA-5653890|Reactome:R-HSA-6798695|Reactome:R-HSA-6803157|Reactome:R-HSA-977225|Reactome:R-MMU-5653890|Reactome:R-MMU-6798695|Reactome:R-MMU-6803157|Reactome:R-RNO-6798695|Reactome:R-RNO-6803157|Reactome:…
Bombus_turneri_lys_3	b79fb731546c2eb30480dc2c4fa1b239	154	Pfam	PF00062	C-type lysozyme/alpha-lactalbumin family	25	143	1.50E-24	T	45846	IPR001916	Glycoside hydrolase, family 22	-	Reactome:R-BTA-6798695|Reactome:R-BTA-6803157|Reactome:R-CFA-6798695|Reactome:R-CFA-6803157|Reactome:R-DME-5653890|Reactome:R-GGA-5653890|Reactome:R-GGA-6798695|Reactome:R-GGA-6803157|Reactome:R-HSA-5653890|Reactome:R-HSA-6798695|Reactome:R-HSA-6803157|Reactome:R-HSA-977225|Reactome:R-MMU-5653890|Reactome:R-MMU-6798695|Reactome:R-MMU-6803157|Reactome:R-RNO-6798695|Reactome:R-RNO-6803157|Reactome:…
Lasioglossum_morio_lys2_3	5d5bcd46ff74ec67e6ee9adce9bea730	123	Pfam	PF00062	C-type lysozyme/alpha-lactalbumin family	5	123	4.10E-23	T	45846	IPR001916	Glycoside hydrolase, family 22	-	Reactome:R-BTA-6798695|Reactome:R-BTA-6803157|Reactome:R-CFA-6798695|Reactome:R-CFA-6803157|Reactome:R-DME-5653890|Reactome:R-GGA-5653890|Reactome:R-GGA-6798695|Reactome:R-GGA-6803157|Reactome:R-HSA-5653890|Reactome:R-HSA-6798695|Reactome:R-HSA-6803157|Reactome:R-HSA-977225|Reactome:R-MMU-5653890|Reactome:R-MMU-6798695|Reactome:R-MMU-6803157|Reactome:R-RNO-6798695|Reactome:R-RNO-6803157|Reactome:…
Macropis_europaea_lys_6	b8c722f840c807b79ba56098a4096fba	125	Pfam	PF00062	C-type lysozyme/alpha-lactalbumin family	6	117	6.40E-23	T	45846	IPR001916	Glycoside hydrolase, family 22	-	Reactome:R-BTA-6798695|Reactome:R-BTA-6803157|Reactome:R-CFA-6798695|Reactome:R-CFA-6803157|Reactome:R-DME-5653890|Reactome:R-GGA-5653890|Reactome:R-GGA-6798695|Reactome:R-GGA-6803157|Reactome:R-HSA-5653890|Reactome:R-HSA-6798695|Reactome:R-HSA-6803157|Reactome:R-HSA-977225|Reactome:R-MMU-5653890|Reactome:R-MMU-6798695|Reactome:R-MMU-6803157|Reactome:R-RNO-6798695|Reactome:R-RNO-6803157|Reactome:…
Nomada_flava_lys_3	45022094e73100fab372e20c1309da5a	127	Pfam	PF00062	C-type lysozyme/alpha-lactalbumin family	7	126	1.20E-21	T	45846	IPR001916	Glycoside hydrolase, family 22	-	Reactome:R-BTA-6798695|Reactome:R-BTA-6803157|Reactome:R-CFA-6798695|Reactome:R-CFA-6803157|Reactome:R-DME-5653890|Reactome:R-GGA-5653890|Reactome:R-GGA-6798695|Reactome:R-GGA-6803157|Reactome:R-HSA-5653890|Reactome:R-HSA-6798695|Reactome:R-HSA-6803157|Reactome:R-HSA-977225|Reactome:R-MMU-5653890|Reactome:R-MMU-6798695|Reactome:R-MMU-6803157|Reactome:R-RNO-6798695|Reactome:R-RNO-6803157|Reactome:…
Osmia_bicornis_lys_6	64426c3747d5f8edde79bdf320290a35	144	Pfam	PF00062	C-type lysozyme/alpha-lactalbumin family	25	136	5.00E-20	T	45846	IPR001916	Glycoside hydrolase, family 22	-	Reactome:R-BTA-6798695|Reactome:R-BTA-6803157|Reactome:R-CFA-6798695|Reactome:R-CFA-6803157|Reactome:R-DME-5653890|Reactome:R-GGA-5653890|Reactome:R-GGA-6798695|Reactome:R-GGA-6803157|Reactome:R-HSA-5653890|Reactome:R-HSA-6798695|Reactome:R-HSA-6803157|Reactome:R-HSA-977225|Reactome:R-MMU-5653890|Reactome:R-MMU-6798695|Reactome:R-MMU-6803157|Reactome:R-RNO-6798695|Reactome:R-RNO-6803157|Reactome:…
Lasioglossum_pauxillum_lys2_6	3bbe952330502ee3fdb22ab55edb7ac1	125	Pfam	PF00062	C-type lysozyme/alpha-lactalbumin family	6	117	2.50E-23	T	45846	IPR001916	Glycoside hydrolase, family 22	-	Reactome:R-BTA-6798695|Reactome:R-BTA-6803157|Reactome:R-CFA-6798695|Reactome:R-CFA-6803157|Reactome:R-DME-5653890|Reactome:R-GGA-5653890|Reactome:R-GGA-6798695|Reactome:R-GGA-6803157|Reactome:R-HSA-5653890|Reactome:R-HSA-6798695|Reactome:R-HSA-6803157|Reactome:R-HSA-977225|Reactome:R-MMU-5653890|Reactome:R-MMU-6798695|Reactome:R-MMU-6803157|Reactome:R-RNO-6798695|Reactome:R-RNO-6803157|Reactome:…
Lasioglossum_morio_lys_3	a1ea6d399f5cc07f98512d92fbab830f	124	Pfam	PF00062	C-type lysozyme/alpha-lactalbumin family	5	124	5.10E-23	T	45846	IPR001916	Glycoside hydrolase, family 22	-	Reactome:R-BTA-6798695|Reactome:R-BTA-6803157|Reactome:R-CFA-6798695|Reactome:R-CFA-6803157|Reactome:R-DME-5653890|Reactome:R-GGA-5653890|Reactome:R-GGA-6798695|Reactome:R-GGA-6803157|Reactome:R-HSA-5653890|Reactome:R-HSA-6798695|Reactome:R-HSA-6803157|Reactome:R-HSA-977225|Reactome:R-MMU-5653890|Reactome:R-MMU-6798695|Reactome:R-MMU-6803157|Reactome:R-RNO-6798695|Reactome:R-RNO-6803157|Reactome:…
Nomada_lathburiana_lys_6	d60d1e2506b27fed6d6572efafb938b2	128	Pfam	PF00062	C-type lysozyme/alpha-lactalbumin family	8	127	6.20E-23	T	45846	IPR001916	Glycoside hydrolase, family 22	-	Reactome:R-BTA-6798695|Reactome:R-BTA-6803157|Reactome:R-CFA-6798695|Reactome:R-CFA-6803157|Reactome:R-DME-5653890|Reactome:R-GGA-5653890|Reactome:R-GGA-6798695|Reactome:R-GGA-6803157|Reactome:R-HSA-5653890|Reactome:R-HSA-6798695|Reactome:R-HSA-6803157|Reactome:R-HSA-977225|Reactome:R-MMU-5653890|Reactome:R-MMU-6798695|Reactome:R-MMU-6803157|Reactome:R-RNO-6798695|Reactome:R-RNO-6803157|Reactome:…
Anthophora_plumipes_lys_3	db8a5a2edd40e5c69531b199e1820c67	126	Pfam	PF00062	C-type lysozyme/alpha-lactalbumin family	8	126	8.80E-23	T	45846	IPR001916	Glycoside hydrolase, family 22	-	Reactome:R-BTA-6798695|Reactome:R-BTA-6803157|Reactome:R-CFA-6798695|Reactome:R-CFA-6803157|Reactome:R-DME-5653890|Reactome:R-GGA-5653890|Reactome:R-GGA-6798695|Reactome:R-GGA-6803157|Reactome:R-HSA-5653890|Reactome:R-HSA-6798695|Reactome:R-HSA-6803157|Reactome:R-HSA-977225|Reactome:R-MMU-5653890|Reactome:R-MMU-6798695|Reactome:R-MMU-6803157|Reactome:R-RNO-6798695|Reactome:R-RNO-6803157|Reactome:…
Lasioglossum_pauxillum_lys_6	e8f845520e3f6488584294e9617a3789	124	Pfam	PF00062	C-type lysozyme/alpha-lactalbumin family	6	116	5.80E-23	T	45846	IPR001916	Glycoside hydrolase, family 22	-	Reactome:R-BTA-6798695|Reactome:R-BTA-6803157|Reactome:R-CFA-6798695|Reactome:R-CFA-6803157|Reactome:R-DME-5653890|Reactome:R-GGA-5653890|Reactome:R-GGA-6798695|Reactome:R-GGA-6803157|Reactome:R-HSA-5653890|Reactome:R-HSA-6798695|Reactome:R-HSA-6803157|Reactome:R-HSA-977225|Reactome:R-MMU-5653890|Reactome:R-MMU-6798695|Reactome:R-MMU-6803157|Reactome:R-RNO-6798695|Reactome:R-RNO-6803157|Reactome:…
Stelis_phaeoptera_lys_6	aebde25a20a00a4f6cac7c08074aed36	124	Pfam	PF00062	C-type lysozyme/alpha-lactalbumin family	5	116	5.10E-19	T	45846	IPR001916	Glycoside hydrolase, family 22	-	Reactome:R-BTA-6798695|Reactome:R-BTA-6803157|Reactome:R-CFA-6798695|Reactome:R-CFA-6803157|Reactome:R-DME-5653890|Reactome:R-GGA-5653890|Reactome:R-GGA-6798695|Reactome:R-GGA-6803157|Reactome:R-HSA-5653890|Reactome:R-HSA-6798695|Reactome:R-HSA-6803157|Reactome:R-HSA-977225|Reactome:R-MMU-5653890|Reactome:R-MMU-6798695|Reactome:R-MMU-6803157|Reactome:R-RNO-6798695|Reactome:R-RNO-6803157|Reactome:…
Ectemnius_lituratus_lys_6	ffd056fd10f85c4fff8aed1e8adc0f55	124	Pfam	PF00062	C-type lysozyme/alpha-lactalbumin family	5	116	8.60E-21	T	45846	IPR001916	Glycoside hydrolase, family 22	-	Reactome:R-BTA-6798695|Reactome:R-BTA-6803157|Reactome:R-CFA-6798695|Reactome:R-CFA-6803157|Reactome:R-DME-5653890|Reactome:R-GGA-5653890|Reactome:R-GGA-6798695|Reactome:R-GGA-6803157|Reactome:R-HSA-5653890|Reactome:R-HSA-6798695|Reactome:R-HSA-6803157|Reactome:R-HSA-977225|Reactome:R-MMU-5653890|Reactome:R-MMU-6798695|Reactome:R-MMU-6803157|Reactome:R-RNO-6798695|Reactome:R-RNO-6803157|Reactome:…
Nysson_spinosus_lys_3	b7a5f0b03666b3ba408cafa4a50cc35d	126	Pfam	PF00062	C-type lysozyme/alpha-lactalbumin family	7	125	9.30E-25	T	45846	IPR001916	Glycoside hydrolase, family 22	-	Reactome:R-BTA-6798695|Reactome:R-BTA-6803157|Reactome:R-CFA-6798695|Reactome:R-CFA-6803157|Reactome:R-DME-5653890|Reactome:R-GGA-5653890|Reactome:R-GGA-6798695|Reactome:R-GGA-6803157|Reactome:R-HSA-5653890|Reactome:R-HSA-6798695|Reactome:R-HSA-6803157|Reactome:R-HSA-977225|Reactome:R-MMU-5653890|Reactome:R-MMU-6798695|Reactome:R-MMU-6803157|Reactome:R-RNO-6798695|Reactome:R-RNO-6803157|Reactome:…
Cerceris_rybyensis_lys_3	ee4e3ac8933dcc356a8a231eb3b1bb06	127	Pfam	PF00062	C-type lysozyme/alpha-lactalbumin family	7	126	4.70E-24	T	45846	IPR001916	Glycoside hydrolase, family 22	-	Reactome:R-BTA-6798695|Reactome:R-BTA-6803157|Reactome:R-CFA-6798695|Reactome:R-CFA-6803157|Reactome:R-DME-5653890|Reactome:R-GGA-5653890|Reactome:R-GGA-6798695|Reactome:R-GGA-6803157|Reactome:R-HSA-5653890|Reactome:R-HSA-6798695|Reactome:R-HSA-6803157|Reactome:R-HSA-977225|Reactome:R-MMU-5653890|Reactome:R-MMU-6798695|Reactome:R-MMU-6803157|Reactome:R-RNO-6798695|Reactome:R-RNO-6803157|Reactome:…

## Sheet: Table S6
Table S6: Individual measures of nucleotide diversity, interspecific divergence, and tissue-specificity of canonical immune genes in Bombus terrestris
Table S6: For each canonical immune gene in the large earth or buff-tailed bumblebee Bombus terrestris, we used publicly available population genomic (Kardum-Hjort et al., Evol. Applications, 2022) and transcriptomic (Zhuang et al., Nat Comm., 2023; Xu & Colgan, MBE, 2025) datasets to examine measures of nucleotide diversity (Pi), interspecific divergence (dNdS - calculated between B. terrestris …
Gene group	Orthogroup	Locus	Pi	dNdS	Tau
AMP	OG0000327	Def	0.00264506	NA	0.233
AMP	OG0001334	LOC100631061	NA	0.3965	NA
AMP	OG0011680	LOC100631078	0.00252662	NA	0.333
APHAG	OG0002446	LOC100649664	7.3066e-05	0	0.111
APHAG	OG0003831	LOC100647728	0.00180823	0	0.167
APHAG	OG0003933	LOC100644291	4.45502e-05	0.05103	0.1
APHAG	OG0004139	LOC100649396	0.00187607	0.2169	0.148
APHAG	OG0004673	LOC100649510	0.00059668	0	0.143
APHAG	OG0004786	LOC100650799	0.00081375	NA	0.143
APHAG	OG0004829	LOC100642312	4.85269e-05	0	0.083
APHAG	OG0005197	LOC100642580	0.00106251	0	0
APHAG	OG0005491	LOC100645758	0.00189282	0	0.167
APHAG	OG0005702	LOC100647678	0.000943124	0.5799	0.167
APHAG	OG0005834	LOC100645690	0.000604851	NA	0
APHAG	OG0005983	LOC100647690	NA	0	0.19
APHAG	OG0006450	LOC100643856	0.00076826	0.07304	0.333
APHAG	OG0006519	LOC100649460	0.00105317	0.1619	0.167
APHAG	OG0006769	LOC100647356	0.000213907	0	0.19
APHAG	OG0006880	LOC100648118	0.000922333	0.1953	0.333
ARK	OG0001701	LOC100651239	0.000650596	0.3476	0.267
CASP	OG0000247	LOC100645000	2.21888e-05	0.9794	0.458
CASP	OG0000247	LOC100646875	0.00198544	0.2471	NA
CASP	OG0002045	LOC100643857	0.00126222	0.1795	0.667
CASP	OG0002713	LOC100652135	0.000664116	0.4268	0.208
CASP	OG0003548	LOC100652115	0.000190521	0.2866	0.333
CAT	OG0002400	LOC100651198	0.00198373	0.1369	0.033
CLIP	OG0000100	LOC100642242	NA	0.4527	0.667
CLIP	OG0000100	LOC100642484	0.00265119	0.1298	0.583
CLIP	OG0000100	LOC100652036	0.00126567	0.235	0.583
CLIP	OG0000100	LOC125384943	NA	0.3092	0.444
CLIP	OG0000100	VSP	0.00170356	1.4	0.433
CLIP	OG0000489	LOC100646730	0.00137735	0.4287	0.633
CLIP	OG0000857	LOC100648752	0.00237895	0.3679	0.067
CLIP	OG0001104	LOC100645926	0.0011308	0.3202	0.286
CLIP	OG0001286	LOC100645388	0.000284169	0.2518	0.5
CLIP	OG0001530	LOC100651256	0.00197991	0.5704	0.333
CLIP	OG0003918	LOC100648106	0.00193265	0.201	0.6
CLIP	OG0003952	LOC100651177	0.00168751	0.09976	0.333
CLIP	OG0004548	LOC100652014	0.00149244	0.05463	0.167
CLIP	OG0005173	LOC100645023	0.00137601	0.2242	0.778
CLIP	OG0005417	LOC100645591	0.000169184	0	0.75
CLIP	OG0005447	LOC100644461	0.00168516	0.7128	NA
CLIP	OG0005762	LOC100647042	0.0015574	0.2439	0.167
CLIP	OG0006813	LOC100651732	0.00150888	0	NA
CLIP	OG0006967	LOC100649373	0.000110186	0.2884	0
CLIP	OG0007332	LOC125384654	NA	0	0.167
CLIP	OG0007742	LOC100642942	0.000325057	0	0.222
CTL	OG0001740	LOC100650672	0.00177906	0.5051	0.4
CTL	OG0001823	LOC100643365	0.00252875	0	0.625
CTL	OG0003176	LOC100644557	0.0018295	0.05964	0.444
CTL	OG0004881	LOC100645018	0.00181964	NA	0.567
CTL	OG0005639	LOC100643736	0.00190091	0.1415	NA
CTL	OG0005791	LOC100644559	0.000826902	0.2238	0.25
CTL	OG0006335	LOC100646693	NA	0	0.333
CTL	OG0006524	LOC100651497	0.00190965	NA	0.148
CTL	OG0006792	LOC100648846	0.00122602	0	0.667
CTL	OG0008136	LOC100645753	0.0018619	0.2063	0.533
FREP	OG0000388	LOC100648942	NA	0.02112	0.033
FREP	OG0000388	LOC100649413	0.00142959	0.08702	0.389
FREP	OG0001750	LOC100648731	0.000225295	0.5393	0.611
GALE	OG0003190	LOC100649028	0.000214503	0	0.292
GALE	OG0004011	LOC100649136	0.000435171	0	0.222
GALE	OG0006683	LOC100645697	0.000928594	0.4178	0.167
GNBP	OG0000914	LOC100647662	0.000627324	0.1994	0.267
GNBP	OG0001694	LOC100642442	0.0012217	0.7835	0.533
IAP	OG0000199	LOC100647488	0.000437772	0.1167	0.033
IAP	OG0000199	LOC100647685	NA	0.6671	0.042
IAP	OG0000199	LOC100650673	NA	0	0.083
IAP	OG0003978	LOC100648203	0.000850299	0.02041	0
IAP	OG0004007	LOC100647478	0.000499348	0	0.19
IAP	OG0008676	LOC100647366	0.000432921	0.675	0.042
IAP	OG0009305	LOC100650065	0.000182996	1.273	0.667
IAP	OG0009305	LOC100652265	0.000486856	1.585	0.208
IGG	OG0000504	LOC100649765	0.00130312	0.3931	0.5
IGG	OG0000512	LOC100644003	0.00140822	NA	0.067
IMD	OG0000611	LOC100631093	4.94821e-05	0.4859	0.048
IMD	OG0003945	LOC100648975	0.00037081	0.2291	0.292
IMD	OG0005010	LOC100645550	NA	0	0.074
IMD	OG0006148	LOC100644423	0.000227321	0.2162	0.222
IMD	OG0006188	LOC100642917	0.000379992	0.1185	0.083
IMD	OG0006444	LOC100648684	0.000247123	0.2423	0.167
IMD	OG0008396	LOC100645713	0.00172416	0.6579	0.267
JAST	OG0002385	LOC100644873	NA	0.1189	0.111
JAST	OG0002504	LOC100642307	0.000170454	1.462	0.19
JAST	OG0002998	LOC100647789	0.000272835	0	0.1
LYS	OG0007140	LOC100642297	0.000653751	NA	0.567
ML	OG0001994	LOC100649847	0.00123694	NA	0.292
ML	OG0002469	LOC100643802	0.00134938	0.2365	0.233
ML	OG0008465	LOC100649270	0.000327602	0	0.167
ML	OG0008732	LOC100647216	0.0023952	0.1281	0.5
NIM	OG0000346	LOC105666552	NA	0.2519	0.433
NIM	OG0002945	LOC100649004	0.000734783	0.1049	0.2
PGRP	OG0000398	LOC105666394	NA	0.3467	0.333
PGRP	OG0001034	LOC100648322	0.000573745	0.945	0.233
PGRP	OG0001352	LOC100651268	7.81509e-05	NA	0.667
PPO	OG0000644	LOC100648607	0.0026342	0.06764	0.556
PRDX	OG0000204	LOC100642912	0.000920919	0	0.033
PRDX	OG0000204	LOC100648859	0.000925809	NA	0.1
PRDX	OG0000339	LOC100646028	0.0019904	0.03658	0
PRDX	OG0000339	LOC100646227	0.00191068	0.9516	0.111
PRDX	OG0001974	LOC100644139	0.00186258	0.1152	0.033
PRDX	OG0001986	LOC100646320	0.00270849	0.2801	0.444
PRDX	OG0002022	LOC100644635	0.00229377	0.06178	0.556
PRDX	OG0004270	LOC100646933	0.0013151	0.01938	0.25
PRDX	OG0004336	LOC100646100	0.000839229	0.05336	0.458
PRDX	OG0004664	LOC100644975	0.000173818	0	0.111
PRDX	OG0005353	LOC100646756	0.000202823	0.2264	0.533
PRDX	OG0005561	LOC100642607	0.00117421	0.2187	0.2
PRDX	OG0006684	LOC100648954	0.000149819	0	0.148
REL	OG0000812	LOC100631054	0.000579833	0.03805	0.074
REL	OG0003522	LOC100631072	0.00043276	0.05998	0.1
SCR	OG0000321	LOC100645888	NA	1.308	0.033
SCR	OG0000321	LOC100648651	0.00138672	0.2212	0.467
SCR	OG0000431	LOC100643022	0.00158206	0.1029	0.333
SCR	OG0000431	LOC100643143	NA	0.122	0.4
SCR	OG0000984	LOC100644923	0.00257648	0.2041	0.167
SCR	OG0001434	LOC100649302	0.00280881	0.4197	0.417
SCR	OG0002021	LOC100650182	0.0011158	0.08097	0.111
SCR	OG0002535	LOC100642932	0.00175758	0.1487	0.4
SCR	OG0002620	LOC100646983	0.00201746	0	0.429
SCR	OG0003366	LOC100650572	0.000537715	0.2892	0.619
SCR	OG0003844	LOC100647556	0.000675934	0.1579	0.476
SCR	OG0004910	LOC100642653	0.00134968	0.9238	0.417
SCR	OG0006301	LOC100651194	0.000988712	0.04105	0.292
SCR	OG0006498	LOC100647114	0.00202268	0.06876	0.667
SCR	OG0007701	LOC100642575	0.00228785	0.1821	0.75
SOD	OG0000245	LOC100642760	NA	0	0.267
SOD	OG0000245	LOC100646662	0.000324561	0.2451	0
SPZ	OG0000086	LOC100643414	NA	0.8791	0.407
SPZ	OG0000086	LOC100645147	0.000514453	1.777	0.6
SPZ	OG0000086	LOC100647390	0.00269276	NA	NA
SPZ	OG0000086	LOC100651697	0.00202135	0.2717	NA
SPZ	OG0000409	LOC100651557	0.00220711	0.1226	0.667
SPZ	OG0000409	LOC105667175	NA	1.356	0.533
SPZ	OG0002737	LOC100644301	0.00224091	0	0.222
SPZ	OG0004631	LOC100648909	0.00128187	0	0.25
SPZ	OG0007508	LOC100652321	0.0025007	0.09463	0.611
SRPN	OG0000122	LOC100648602	0.00330789	0.365	0.333
SRPN	OG0000122	LOC100648833	NA	0	0
SRPN	OG0000122	LOC100652301	0.00209498	0.7014	0.367
SRPN	OG0000122	LOC125385891	NA	1.556	0
SRPN	OG0001063	LOC100642902	0.00215114	0.3847	0.542
SRPN	OG0001356	LOC100651301	0.00179895	0.3122	0.833
SRPN	OG0001590	LOC100644115	0.00138385	0.1767	0.467
SRPN	OG0001714	LOC100645458	0.00248211	0.1255	0.167
SRPN	OG0004321	LOC100647974	0.00132543	0.5274	0.1
SRPN	OG0007947	LOC100644450	NA	0.06263	0.2
SRRP	OG0000178	LOC100644474	NA	1.172	0.167
SRRP	OG0000178	LOC100645618	8.98328e-05	0.4446	0.222
SRRP	OG0000190	LOC100647119	0.000169813	0	0.708
SRRP	OG0000190	LOC100648299	0.00014797	0	0.037
SRRP	OG0000757	LOC100644688	5.56614e-05	0	0.1
SRRP	OG0000905	LOC100650316	0.000388889	0.7811	0
SRRP	OG0001417	LOC100647036	0.000449512	0.4335	0.033
SRRP	OG0001672	LOC100648790	0.000286647	0.306	0.533
SRRP	OG0001984	LOC100646008	0.00028904	1.182	0.533
SRRP	OG0001998	LOC100649628	9.54527e-05	0	0
SRRP	OG0002044	LOC100645309	0.000606026	0.5148	0.367
SRRP	OG0002165	LOC100646901	0.000459015	0.351	0.467
SRRP	OG0002220	LOC100649451	0.000360551	0.1329	0.208
SRRP	OG0002344	LOC100645630	0.00040531	0.2686	0.333
SRRP	OG0002370	LOC100650374	0.000567337	0	0.111
SRRP	OG0002466	LOC100642865	0.000115826	0.4137	0.208
SRRP	OG0002592	LOC100646877	0.000353785	0.01628	0.133
SRRP	OG0003358	LOC100646748	0.000859605	0	0
SRRP	OG0003433	LOC100650410	8.0078e-05	0.07878	0.067
SRRP	OG0003566	LOC100645464	0.0014827	0.3336	0
SRRP	OG0003841	LOC100649034	0.000544759	0.1612	0.1
SRRP	OG0004198	LOC100644562	0.000362957	0.203	0.1
SRRP	OG0004356	LOC100650840	0.000913729	0.1346	0.167
SRRP	OG0004686	LOC100651377	0.000412484	0	0.333
SRRP	OG0004768	LOC100644656	0.00092278	0.2727	0.407
SRRP	OG0005922	LOC100642999	6.18852e-05	0.3774	0.25
SRRP	OG0006338	LOC100647746	0.000405826	0.1257	0
SRRP	OG0007357	LOC100648096	0.00055816	0	0
TEP	OG0002197	LOC100644444	0.0012441	0.2225	0.367
TEP	OG0003051	LOC100647494	0.000248043	0.09446	0.1
TEP	OG0004656	LOC100631073	0.000924751	0	0.25
TOLL	OG0001398	LOC100651716	0.00213795	0.4563	0.367
TOLL	OG0001682	LOC100631094	0.000547803	0.3895	0.133
TOLL	OG0002313	LOC100650697	0.00059482	0.07744	0.111
TOLL	OG0003414	LOC100647698	0.000921606	0	NA
TOLL	OG0003660	LOC100631067	0.00142796	0.1432	0.593
TOLL	OG0004590	LOC100644648	0.00110075	0.1222	0.417
TOLL	OG0004619	LOC100648060	0.00101969	0.2394	0.074
TOLL	OG0007017	LOC100646856	0.000908594	0.03803	0.583
TOLL	OG0007609	LOC100643452	0.000370437	NA	0.2

## Sheet: Table S7
Table S7: Output of a generalised additive model examining the relationship between maximum gene group size and dNdS values in select bee species
Table S7: Output of a generalised additive model (GAM) to investigate the range and median absolute deviation of dNdS and the size of immune-related functional gene group. For each model, the family and pairwise species comparison, the estimated degrees of freedom, f-statistic for the smoothened term, and corresponding p-value.
Family	Pairwise species comparison	Model	edf	F	P
Megachilidae	Megachile leachella - Megachile rotundata	range ~ s(size)	3.269	7.33	0.000575
		MAD ~ s(size)	1.027	1.423	0.233
Andrenidae	Andrena fulva - Andrena haemorrhoa	range ~ s(size)	3.064	6.204	0.0016
		MAD ~ s(size)	1.46	0.302	0.634
Halictidae	Lasioglossum pauxillum - Lasioglossum morio	range ~ s(size)	3.453	6.073	0.00166
		MAD ~ s(size)	1	0.139	0.713
Colletidae	Hylaeus volcanicus - Hylaeus anthracinus	range ~ s(size)	4.23	3.609	0.0145
		MAD ~ s(size)	3.709	0.795	0.622

## Sheet: Table S8
Table S8: Genomic coordinates for defensin copies in bee species
Table S8: Genomic coordinates for defensin gene copies in each species, including family, species name, locus, gene id, linkage group/scaffold, start position, end position, gene length, protein length, and distance between duplicates if more than one copy per defensin exists in a species and is located on the same scaffold are provided.
Family	Species	Locus	Gene ID	Linkage group/scaffold	Start position	End position	Gene length (bp)	Protein length (aa)	Distance between duplicates (bp)
Andrenidae	Andrena bucephala	Def1	ENSRADG00005003832	1	78309593	78313001	3408	113
Andrenidae	Andrena chrysosceles	Def1	ENSEQOG00000011138	1	9267662	9268749	1087	118	136
Andrenidae	Andrena chrysosceles	Def1	ENSEQOG00000011816	1	9268885	9271156	2271	134
Andrenidae	Andrena fulva	Def1	ENSAFVG00005003856	2	60511941	60513630	1689	97
Andrenidae	Andrena haemorrhoa	Def1	ENSAHEG00005005364	6	29829820	29830692	872	99	dif chr
Andrenidae	Andrena haemorrhoa	Def1	ENSAHEG00005007099	2	41489958	41491454	1496	97
Andrenidae	Andrena minutula	Def1	ENSELIG00005004086	1	7267834	7270096	2262	97
Andrenidae	Andrena trimmerana	Def1	ENSFOKG00000006044	1	61930283	61931294	1011	112	569
Andrenidae	Andrena trimmerana	Def1	ENSFOKG00000011233	1	61927532	61929714	2182	138
Apidae	Anthophora plumipes	Def1	ENSHQCG00000001938	3	19781949	19784632	2683	110
Apidae	Apis dorsata	Def1	LOC102672730	KI273618.1	23126	24107	981	95
Apidae	Apis florea	Def1	LOC100868088	GL576449.1	6077550	6078756	1206	94
Apidae	Apis mellifera	Def1	GeneID 406143	CM009936.2	8673495	8675023	1528	95
Apidae	Bombus affinis	Def1	LOC126915922	CM044940.1	16284698	16286980	2282	96
Apidae	Bombus bifarius	Def1	ENSBBSG00000002741	JAAQOX010000201.1	3839526	3842593	3067	157
Apidae	Bombus breviceps	Def1	ENSBBEG00000005290	LG6	2739010	2741811	2801	159
Apidae	Bombus campestris	Def1	ENSBCMG00005032852	14	4787204	4792212	5008	159
Apidae	Bombus confusus	Def1	ENSBCFG00000002094	JACXIV010000008.1	2958907	2961535	2628	177
Apidae	Bombus consobrinus	Def1	ENSBCSG00000005827	JACXIU010000020.1	9776293	9780422	4129	159
Apidae	Bombus cullumanus	Def1	ENSBCUG00000006369	JACXIX010000016.1	1785045	1788093	3048	159
Apidae	Bombus difficillimus	Def1	ENSBDIG00000002474	JACXIT010000122.1	1256777	1259442	2665	104
Apidae	Bombus haemorrhoidalis	Def1	ENSBHAG00000008248	LG6	3605627	3608427	2800	96
Apidae	Bombus hortorum	Def1	ENSBHTG00000010217	2	16357035	16360449	3414	159
Apidae	Bombus huntii	Def1	LOC126877447	CM045111.1	17026391	17028724	2333	157
Apidae	Bombus hypnorum	Def1	ENSBHYG00000011186	2	5149147	5152195	3048	159
Apidae	Bombus ignitus	Def1	ENSBIGG00000007343	LG6	4932742	4935878	3136	159
Apidae	Bombus impatiens	Def1	LOC100744436	JH157813.1	914834	917147	2313	157
Apidae	Bombus muscorum	Def1	ENSAMQG00000004973	1	28505016	28507880	2864	159
Apidae	Bombus opulentus	Def1	ENSBOPG00000001212	JACXIQ010000021.1	2889416	2892526	3110	159
Apidae	Bombus pascuorum	Def1	ENSBPAG00000005239	1	29867929	29871289	3360	159
Apidae	Bombus picipes	Def1	ENSBPIG00000006801	JACXIP010000017.1	5494128	5497310	3182	96
Apidae	Bombus polaris	Def1	ENSBPOG00000009949	JACXIO010000194.1	1258930	1262051	3121	96
Apidae	Bombus pratorum	Def1	ENSBPTG00005009504	2	15793485	15806371	12886	159
Apidae	Bombus pyrosoma	Def1	ENSBPYG00000012617	LG6	8231999	8235114	3115	159
Apidae	Bombus sibiricus	Def1	ENSBSBG00000004076	JACXIM010000081.1	2677917	2680715	2798	101
Apidae	Bombus skorikovi	Def1	ENSBSKG00000008549	JACXIH010000017.1	1153900	1157903	4003	107
Apidae	Bombus soroeensis	Def1	ENSBSOG00000009724	JACXIL010000250.1	530059	533022	2963	96
Apidae	Bombus superbus	Def1	ENSBSUG00000000940	JACXIK010000017.1	9091283	9094517	3234	160
Apidae	Bombus sylvestris	Def1	ENSBSYG00000014024	11	4635722	4639792	4070	96
Apidae	Bombus terrestris	Def1	Def	NC 063274.1	5164229	5166145	1916	96
Apidae	Bombus turneri	Def1	ENSBTNG00000010547	LG6	5048702	5052279	3577	178	12224
Apidae	Bombus turneri	Def1	ENSBTNG00000010689	LG6	5064503	5065825	1322	110
Apidae	Bombus vancouverensis	Def1	LOC117166690	JAAQRE010000124.1	2088788	2091014	2226	96
Apidae	Bombus vestalis	Def1	ENSQDAG00000004704	14	4745328	4749580	4252	159
Apidae	Bombus vosnesenskii	Def1	ENSBVOG00000018602	JAAQVK010000181.1	5041131	5044199	3068	157
Apidae	Bombus waltoni	Def1	ENSBWAG00000005837	JACXII010000048.1	5445210	5448456	3246	160
Apidae	Eufriesea mexicana	Def1	LOC108549430	KQ762031.1	585896	587734	1838	98
Apidae	Habropoda laboriosa	Def1	LOC108570380	KQ414625.1	136015	137902	1887	96
Apidae	Nomada fabriciana	Def1	ENSNFBG00000002572	1	9379331	9380527	1196	96
Apidae	Nomada ferruginata	Def1	ENSEXZG00000007578	1	11642131	11644208	2077	154
Apidae	Nomada flava	Def1	ENSQOJG00000004550	2	11188617	11190719	2102	154
Apidae	Nomada fucata	Def1	ENSFANG00005002096	1	9498662	9500462	1800	111
Apidae	Nomada hirtipes	Def1	ENSXLVG00000003363	1	21437086	21439360	2274	154
Apidae	Nomada panzeri	Def1	ENSFLUG00000009249	2	11236312	11238871	2559	154
Apidae	Nomada ruficornis	Def1	ENSYGNG00000001265	1	16480559	16482394	1835	154
Colletidae	Colletes gigas	Def1	ENSCGGG00000008905	WUUM01000018.1	5713085	5714967	1882	139	overlap
Colletidae	Colletes gigas	Def1	ENSCGGG00000009065	WUUM01000018.1	5708605	5716295	7690	80
Crabronidae	Ectemnius cavifrons	Def1	ENSTSJG00000002219	1	1485722	1486812	1090	106
Crabronidae	Ectemnius continuus	Def1	ENSECTG00005004027	1	16857867	16858819	952	95
Crabronidae	Ectemnius lituratus	Def1	ENSELIG00005000172	2	13872370	13874036	1666	95
Crabronidae	Mimumesa dahlbomi	Def1	BRAKERMDHG00005012598	7	14371341	14372667	1326	92
Crabronidae	Nysson spinosus	Def1	ENSNSPG00005001705	2	4523025	4525098	2073	92
Drosophilidae	Drosophila melanogaster	Def1	FBgn0010385	2R	10054178	10054576	398	92
Formicidae	Solenopsis invicta	Def1	LOC105196210	CM028745.1	13946771	13949243	2472	108	5031389
Formicidae	Solenopsis invicta	Def1	LOC113003652	CM028745.1	18980632	18981734	1102	96
Halictidae	Dufourea novaeangliae	Def1	LOC107187609	KQ434869.1	310500	312654	2154	87	640
Halictidae	Dufourea novaeangliae	Def1	LOC107187610	KQ434869.1	313294	314160	866	92
Halictidae	Lasioglossum lativentre	Def1	ENSLLVG00000013186	8	2314540	2317092	2552	97	145788
Halictidae	Lasioglossum lativentre	Def1	ENSLLVG00000013554	8	2167792	2168752	960	97
Halictidae	Lasioglossum morio	Def1	ENSLMRG00010006990	3	11725013	11726473	1460	103
Halictidae	Lasioglossum pauxillum	Def1	ENSLPUG00000015982	5	45947696	45959965	12269	97
Halictidae	Seladonia tumulorum	Def1	BRAKERSTMG00015009287	3	14484833	14485952	1119	97
Halictidae	Sphecodes monilicornis	Def1	ENSSSOG00015003277	1	37287167	37290365	3198	132
Megachilidae	Megachile leachella	Def1	ENSIQGG00000013583	8	12905617	12907447	1830	163
Megachilidae	Megachile ligniseca	Def1	ENSMLIG00010010770	3	11759709	11760824	1115	95
Megachilidae	Megachile rotundata	Def1	LOC100881197	GL985789.1	1467753	1469429	1676	163
Megachilidae	Megachile willughbiella	Def1	ENSMWIG00010014074	4	5944195	5945937	1742	163
Megachilidae	Osmia bicornis	Def1	ENSOBBG00005013070	4	10565588	10567131	1543	102	125
Megachilidae	Osmia bicornis	Def1	ENSOBBG00005014507	4	10564931	10565463	532	154
Megachilidae	Stelis phaeoptera	Def1	ENSolsG00005001014	8	7551449	7552448	999	111	2060
Megachilidae	Stelis phaeoptera	Def1	ENSolsG00005001328	8	7554508	7555408	900	76
Megachilidae	Stelis phaeoptera	Def1	ENSolsG00005005677	1	15534881	15535639	758	77	dif chr
Melittidae	Macropis europaea	Def1	ENSMEOG00010000348	1	37763034	37766209	3175	99
Philanthidae	Cerceris rybyensis	Def1	ENSCRYG00005002598	1	38610419	38612601	2182	92
Pteromalidae	Nasonia vitripennis	Def1	GeneID 100115742	CM020934.1	531077	531717	640	101	1360
Pteromalidae	Nasonia vitripennis	Def1	GeneID 100310843	CM020934.1	533077	533814	737	101
Tenthredinidae	Athalia rosae	Def1	ENSAEAG00005003741	6	8824703	8825732	1029	103
Andrenidae	Andrena bucephala	Def2	ENSRADG00005002384	1	17368606	17370999	2393	103	10777
Andrenidae	Andrena bucephala	Def2	ENSRADG00005002540	1	17381776	17383863	2087	154
Andrenidae	Andrena chrysosceles	Def2	ENSEQOG00000012516	1	102955655	102958167	2512	103
Andrenidae	Andrena dorsata	Def2	ENSADOG00000011238	3	46720966	46723589	2623	103	7610
Andrenidae	Andrena dorsata	Def2	ENSADOG00000012062	3	46711240	46713356	2116	108
Andrenidae	Andrena fulva	Def2	ENSAFVG00005000409	1	54037235	54039929	2694	103	21602
Andrenidae	Andrena fulva	Def2	ENSAFVG00005004563	1	54061531	54063645	2114	108
Andrenidae	Andrena haemorrhoa	Def2	ENSAHEG00005013989	4	10077830	10086507	8677	160
Andrenidae	Andrena hattorfiana	Def2	ENSAHTG00000012437	3	28310639	28325633	14994	154
Andrenidae	Andrena minutula	Def2	ENSELIG00005002122	2	32066820	32068910	2090	154	9461
Andrenidae	Andrena minutula	Def2	ENSELIG00005002334	2	32055534	32057359	1825	103
Andrenidae	Andrena trimmerana	Def2	ENSFOKG00000002742	2	7548085	7549826	1741	103	14861
Andrenidae	Andrena trimmerana	Def2	ENSFOKG00000003041	2	7531215	7533224	2009	154
Apidae	Apis dorsata	Def2	LOC102675783	KI273521.1	591273	595957	4684	103
Apidae	Apis florea	Def2	LOC100867071	GL577459.1	289432	290306	874	103
Apidae	Apis mellifera	Def2	GeneID 413397	CM009946.2	5139659	5140578	919	104
Apidae	Eufriesea mexicana	Def2	LOC108552460	KQ766586.1	338956	340601	1645	106
Apidae	Habropoda laboriosa	Def2	LOC108573578	KQ414680.1	81787	83579	1792	108
Apidae	Nomada fabriciana	Def2	ENSNFBG00000008616	6	2167166	2169369	2203	104
Apidae	Nomada ferruginata	Def2	ENSEXZG00000006476	2	17348472	17349204	732	133
Apidae	Nomada flava	Def2	ENSQOJG00000011649	5	3667575	3670329	2754	120
Apidae	Nomada fucata	Def2	ENSFANG00005003879	2	16586428	16588824	2396	104
Apidae	Nomada hirtipes	Def2	ENSXLVG00000006200	3	5796332	5798458	2126	113
Apidae	Nomada lathburiana	Def2	ENSZOXG00000012198	2	4381770	4389379	7609	104
Apidae	Nomada panzeri	Def2	ENSFLUG00000015146	5	4250570	4253333	2763	120
Apidae	Nomada ruficornis	Def2	ENSYGNG00000005374	2	4241872	4244652	2780	104
Colletidae	Colletes gigas	Def2	ENSCGGG00000006655	WUUM01000034.1	40417	42160	1743	125
Colletidae	Hylaeus anthracinus	Def2	LOC128896827	JANDJY010001599.1	4119954	4121539	1585	97	3158
Colletidae	Hylaeus anthracinus	Def2	LOC128896828	JANDJY010001599.1	4124697	4126126	1429	97
Colletidae	Hylaeus volcanicus	Def2	LOC128881882	CM047973.1	447015	449747	2732	109	overlap
Colletidae	Hylaeus volcanicus	Def2	LOC128881883	CM047973.1	442864	462665	19801	97
Crabronidae	Mimumesa dahlbomi	Def2	BRAKERMDHG00005007411	2	14818430	14820273	1843	104	5155
Crabronidae	Mimumesa dahlbomi	Def2	BRAKERMDHG00005007862	2	14811546	14813275	1729	99
Crabronidae	Nysson spinosus	Def2	ENSNSPG00005009863	16	6260753	6262186	1433	114
Formicidae	Solenopsis invicta	Def2	LOC105198932	CM028746.1	6998105	7001974	3869	109
Halictidae	Dufourea novaeangliae	Def2	LOC107190435	KQ434946.1	865770	867024	1254	103
Halictidae	Lasioglossum lativentre	Def2	ENSLLVG00000007809	5	643766	644583	817	135	1307
Halictidae	Lasioglossum lativentre	Def2	ENSLLVG00000009065	5	645890	646684	794	135
Halictidae	Lasioglossum morio	Def2	ENSLMRG00010008036	4	2988892	2993289	4397	136	overlap
Halictidae	Lasioglossum morio	Def2	ENSLMRG00010009948	4	2988892	2990587	1695	136
Halictidae	Lasioglossum pauxillum	Def2	ENSLPUG00000007684	6	46289975	46295203	5228	135
Halictidae	Seladonia tumulorum	Def2	BRAKERSTMG00015016641	9	14591716	14592679	963	129	951
Halictidae	Seladonia tumulorum	Def2	BRAKERSTMG00015016868	9	14593630	14594720	1090	123
Halictidae	Sphecodes monilicornis	Def2	ENSSSOG00015001686	10	6664795	6666444	1649	88	58017
Halictidae	Sphecodes monilicornis	Def2	ENSSSOG00015001848	10	6601641	6606778	5137	141
Halictidae	Sphecodes monilicornis	Def2	ENSSSOG00015003852	10	6642869	6644517	1648	128
Halictidae	Sphecodes monilicornis	Def2	ENSSSOG00015004719	10	6597362	6599528	2166	123
Megachilidae	Megachile leachella	Def2	ENSIQGG00000003970	2	11173478	11174663	1185	102
Megachilidae	Megachile ligniseca	Def2	ENSMLIG00010004488	1	9307965	9309201	1236	103
Megachilidae	Megachile rotundata	Def2	LOC105662947	GL985855.1	1173682	1176389	2707	102
Megachilidae	Megachile willughbiella	Def2	ENSMWIG00010009742	1	13440858	13442627	1769	109
Megachilidae	Osmia bicornis	Def2	ENSOBBG00005012366	2	2274849	2276577	1728	105
Megachilidae	Stelis phaeoptera	Def2	ENSolsG00005004815	1	8375429	8377537	2108	103
Melittidae	Macropis europaea	Def2	ENSMEOG00010001310	1	22655877	22657879	2002	100
Philanthidae	Cerceris rybyensis	Def2	ENSCRYG00005004675	5	12463675	12469940	6265	97	18187
Philanthidae	Cerceris rybyensis	Def2	ENSCRYG00005004895	5	12443024	12445488	2464	82
Pteromalidae	Nasonia vitripennis	Def2	LOC100121630	CM020935.1	31521833	31522486	653	103	2285
Pteromalidae	Nasonia vitripennis	Def2	LOC103315847	CM020935.1	31518805	31519548	743	118
Pteromalidae	Nasonia vitripennis	Def2	LOC103315848	CM020935.1	31520773	31521388	615	106
Tenthredinidae	Athalia rosae	Def2	ENSAEAG00005002629	6	8820019	8820725	706	107

## Sheet: Table S9
Table S9: InterProScan annotation of defensin gene copies
Table S9: For genomic regions encoding for putative defensins in bee species identified by tBLASTn, we predicted translated the regions into six possible reading frames. We kept sequences without a terminator and then annotated them using InterProScan with the Pfam dataset to identify conserved functional domains. For each alignment, we provdie the protein accession, including the species it deri…
Family	Species	Locus	GeneID	Sequence MD5 digest	Sequence length	Analysis	Signature accession	Signature description	1. Start location	1. Stop location	e-value	Status	Date	InterPro annotations - accession	InterPro annotations - description	GO annotations with their source(s)	Pathways annotations
Andrenidae	Andrena bucephala	Def1	ENSRADG00005003832	6d5e3d72cbc620d6ba1ebd4abecc361d	113	Pfam	PF01097	Arthropod defensin	74	100	3.7E-5	TRUE	2025-06-26	IPR001542	Defensin, invertebrate/fungal	GO:0006952(InterPro)	-
Andrenidae	Andrena bucephala	Def1	ENSRADG00005003832	6d5e3d72cbc620d6ba1ebd4abecc361d	113	SUPERFAMILY	SSF57095	Scorpion toxin-like	62	100	7.67E-9	TRUE	2025-06-26	IPR036574	Knottin, scorpion toxin-like superfamily	-	-
Andrenidae	Andrena bucephala	Def1	ENSRADG00005003832	6d5e3d72cbc620d6ba1ebd4abecc361d	113	Gene3D	G3DSA:3.30.30.10	-	62	102	3.2E-14	TRUE	2025-06-26	IPR036574	Knottin, scorpion toxin-like superfamily	-	-
Andrenidae	Andrena bucephala	Def1	ENSRADG00005003832	6d5e3d72cbc620d6ba1ebd4abecc361d	113	ProSiteProfiles	PS51378	Invertebrate defensins family profile.	61	101	9.94548	TRUE	2025-06-26	IPR001542	Defensin, invertebrate/fungal	GO:0006952(InterPro)	-
Andrenidae	Andrena chrysosceles	Def1	ENSEQOG00000011138	c017ad6af85f1a7468934e4802b2395e	118	SMART	SM00505	gth 4	68	108	0.0038	TRUE	2025-06-26	IPR003614	Knottin, scorpion toxin-like	GO:0006952(InterPro)	-
Andrenidae	Andrena chrysosceles	Def1	ENSEQOG00000011138	c017ad6af85f1a7468934e4802b2395e	118	PRINTS	PR00271	Defensin signature	78	87	3.0E-5	TRUE	2025-06-26	IPR017982	Defensin, insect	-	-
Andrenidae	Andrena chrysosceles	Def1	ENSEQOG00000011138	c017ad6af85f1a7468934e4802b2395e	118	PRINTS	PR00271	Defensin signature	95	104	3.0E-5	TRUE	2025-06-26	IPR017982	Defensin, insect	-	-
Andrenidae	Andrena chrysosceles	Def1	ENSEQOG00000011138	c017ad6af85f1a7468934e4802b2395e	118	PRINTS	PR00271	Defensin signature	87	95	3.0E-5	TRUE	2025-06-26	IPR017982	Defensin, insect	-	-
Andrenidae	Andrena chrysosceles	Def1	ENSEQOG00000011138	c017ad6af85f1a7468934e4802b2395e	118	SUPERFAMILY	SSF57095	Scorpion toxin-like	67	106	5.63E-9	TRUE	2025-06-26	IPR036574	Knottin, scorpion toxin-like superfamily	-	-
Andrenidae	Andrena chrysosceles	Def1	ENSEQOG00000011138	c017ad6af85f1a7468934e4802b2395e	118	Pfam	PF01097	Arthropod defensin	78	105	6.5E-6	TRUE	2025-06-26	IPR001542	Defensin, invertebrate/fungal	GO:0006952(InterPro)	-
Andrenidae	Andrena chrysosceles	Def1	ENSEQOG00000011138	c017ad6af85f1a7468934e4802b2395e	118	ProSiteProfiles	PS51378	Invertebrate defensins family profile.	66	106	10.4852	TRUE	2025-06-26	IPR001542	Defensin, invertebrate/fungal	GO:0006952(InterPro)	-
Andrenidae	Andrena chrysosceles	Def1	ENSEQOG00000011138	c017ad6af85f1a7468934e4802b2395e	118	Gene3D	G3DSA:3.30.30.10	-	67	107	3.2E-15	TRUE	2025-06-26	IPR036574	Knottin, scorpion toxin-like superfamily	-	-
Andrenidae	Andrena chrysosceles	Def1	ENSEQOG00000011816	e427ea347d6fe76e58a73f3190c262cb	134	Gene3D	G3DSA:3.30.30.10	-	83	123	1.7E-14	TRUE	2025-06-26	IPR036574	Knottin, scorpion toxin-like superfamily	-	-
Andrenidae	Andrena chrysosceles	Def1	ENSEQOG00000011816	e427ea347d6fe76e58a73f3190c262cb	134	ProSiteProfiles	PS51378	Invertebrate defensins family profile.	82	122	10.259	TRUE	2025-06-26	IPR001542	Defensin, invertebrate/fungal	GO:0006952(InterPro)	-
Andrenidae	Andrena chrysosceles	Def1	ENSEQOG00000011816	e427ea347d6fe76e58a73f3190c262cb	134	Pfam	PF01097	Arthropod defensin	95	121	1.6E-5	TRUE	2025-06-26	IPR001542	Defensin, invertebrate/fungal	GO:0006952(InterPro)	-
Andrenidae	Andrena chrysosceles	Def1	ENSEQOG00000011816	e427ea347d6fe76e58a73f3190c262cb	134	SUPERFAMILY	SSF57095	Scorpion toxin-like	83	121	1.02E-8	TRUE	2025-06-26	IPR036574	Knottin, scorpion toxin-like superfamily	-	-
Andrenidae	Andrena fulva	Def1	ENSAFVG00005003856	c47d98f84fbef7fd1da77f2c6362a3dc	97	SUPERFAMILY	SSF57095	Scorpion toxin-like	46	84	5.78E-9	TRUE	2025-06-26	IPR036574	Knottin, scorpion toxin-like superfamily	-	-
Andrenidae	Andrena fulva	Def1	ENSAFVG00005003856	c47d98f84fbef7fd1da77f2c6362a3dc	97	Pfam	PF01097	Arthropod defensin	58	84	1.6E-5	TRUE	2025-06-26	IPR001542	Defensin, invertebrate/fungal	GO:0006952(InterPro)	-
Andrenidae	Andrena fulva	Def1	ENSAFVG00005003856	c47d98f84fbef7fd1da77f2c6362a3dc	97	Gene3D	G3DSA:3.30.30.10	-	46	86	2.3E-14	TRUE	2025-06-26	IPR036574	Knottin, scorpion toxin-like superfamily	-	-
Andrenidae	Andrena fulva	Def1	ENSAFVG00005003856	c47d98f84fbef7fd1da77f2c6362a3dc	97	ProSiteProfiles	PS51378	Invertebrate defensins family profile.	45	85	9.94548	TRUE	2025-06-26	IPR001542	Defensin, invertebrate/fungal	GO:0006952(InterPro)	-
Andrenidae	Andrena haemorrhoa	Def1	ENSAHEG00005005364	47a85dc6bbdab2df05c7ae768b980d3e	99	Gene3D	G3DSA:3.30.30.10	-	60	99	1.6E-14	TRUE	2025-06-26	IPR036574	Knottin, scorpion toxin-like superfamily	-	-
Andrenidae	Andrena haemorrhoa	Def1	ENSAHEG00005005364	47a85dc6bbdab2df05c7ae768b980d3e	99	Pfam	PF01097	Arthropod defensin	72	98	6.3E-6	TRUE	2025-06-26	IPR001542	Defensin, invertebrate/fungal	GO:0006952(InterPro)	-
Andrenidae	Andrena haemorrhoa	Def1	ENSAHEG00005005364	47a85dc6bbdab2df05c7ae768b980d3e	99	PRINTS	PR00271	Defensin signature	71	80	9.4E-5	TRUE	2025-06-26	IPR017982	Defensin, insect	-	-
Andrenidae	Andrena haemorrhoa	Def1	ENSAHEG00005005364	47a85dc6bbdab2df05c7ae768b980d3e	99	PRINTS	PR00271	Defensin signature	80	88	9.4E-5	TRUE	2025-06-26	IPR017982	Defensin, insect	-	-
Andrenidae	Andrena haemorrhoa	Def1	ENSAHEG00005005364	47a85dc6bbdab2df05c7ae768b980d3e	99	PRINTS	PR00271	Defensin signature	88	97	9.4E-5	TRUE	2025-06-26	IPR017982	Defensin, insect	-	-
Andrenidae	Andrena haemorrhoa	Def1	ENSAHEG00005005364	47a85dc6bbdab2df05c7ae768b980d3e	99	ProSiteProfiles	PS51378	Invertebrate defensins family profile.	59	99	10.2128	TRUE	2025-06-26	IPR001542	Defensin, invertebrate/fungal	GO:0006952(InterPro)	-
Andrenidae	Andrena haemorrhoa	Def1	ENSAHEG00005005364	47a85dc6bbdab2df05c7ae768b980d3e	99	SUPERFAMILY	SSF57095	Scorpion toxin-like	60	98	5.58E-9	TRUE	2025-06-26	IPR036574	Knottin, scorpion toxin-like superfamily	-	-
Andrenidae	Andrena haemorrhoa	Def1	ENSAHEG00005007099	2452d0b1d98091473f99312130cc8e08	97	ProSiteProfiles	PS51378	Invertebrate defensins family profile.	45	85	9.99174	TRUE	2025-06-26	IPR001542	Defensin, invertebrate/fungal	GO:0006952(InterPro)	-
Andrenidae	Andrena haemorrhoa	Def1	ENSAHEG00005007099	2452d0b1d98091473f99312130cc8e08	97	Pfam	PF01097	Arthropod defensin	58	84	1.6E-5	TRUE	2025-06-26	IPR001542	Defensin, invertebrate/fungal	GO:0006952(InterPro)	-
Andrenidae	Andrena haemorrhoa	Def1	ENSAHEG00005007099	2452d0b1d98091473f99312130cc8e08	97	SUPERFAMILY	SSF57095	Scorpion toxin-like	46	84	5.27E-9	TRUE	2025-06-26	IPR036574	Knottin, scorpion toxin-like superfamily	-	-
Andrenidae	Andrena haemorrhoa	Def1	ENSAHEG00005007099	2452d0b1d98091473f99312130cc8e08	97	Gene3D	G3DSA:3.30.30.10	-	46	86	1.5E-14	TRUE	2025-06-26	IPR036574	Knottin, scorpion toxin-like superfamily	-	-
Andrenidae	Andrena minutula	Def1	ENSELIG00005004086	NA	NA	NA	NA	NA	NA	NA	NA	NA	NA	NA	NA	NA	NA
Andrenidae	Andrena trimmerana	Def1	ENSFOKG00000006044	4f122ea50ed9823db0b9cf63aa5976ea	112	ProSiteProfiles	PS51378	Invertebrate defensins family profile.	60	100	9.94548	TRUE	2025-06-26	IPR001542	Defensin, invertebrate/fungal	GO:0006952(InterPro)	-
Andrenidae	Andrena trimmerana	Def1	ENSFOKG00000006044	4f122ea50ed9823db0b9cf63aa5976ea	112	Gene3D	G3DSA:3.30.30.10	-	61	101	3.1E-14	TRUE	2025-06-26	IPR036574	Knottin, scorpion toxin-like superfamily	-	-
Andrenidae	Andrena trimmerana	Def1	ENSFOKG00000006044	4f122ea50ed9823db0b9cf63aa5976ea	112	Pfam	PF01097	Arthropod defensin	73	99	3.6E-5	TRUE	2025-06-26	IPR001542	Defensin, invertebrate/fungal	GO:0006952(InterPro)	-
Andrenidae	Andrena trimmerana	Def1	ENSFOKG00000006044	4f122ea50ed9823db0b9cf63aa5976ea	112	SUPERFAMILY	SSF57095	Scorpion toxin-like	61	99	7.45E-9	TRUE	2025-06-26	IPR036574	Knottin, scorpion toxin-like superfamily	-	-
Andrenidae	Andrena trimmerana	Def1	ENSFOKG00000011233	520885fed2b4cde007503b5132c4ff56	138	SUPERFAMILY	SSF57095	Scorpion toxin-like	87	125	1.1E-8	TRUE	2025-06-26	IPR036574	Knottin, scorpion toxin-like superfamily	-	-
Andrenidae	Andrena trimmerana	Def1	ENSFOKG00000011233	520885fed2b4cde007503b5132c4ff56	138	Gene3D	G3DSA:3.30.30.10	-	87	127	1.8E-14	TRUE	2025-06-26	IPR036574	Knottin, scorpion toxin-like superfamily	-	-
Andrenidae	Andrena trimmerana	Def1	ENSFOKG00000011233	520885fed2b4cde007503b5132c4ff56	138	Pfam	PF01097	Arthropod defensin	99	125	1.7E-5	TRUE	2025-06-26	IPR001542	Defensin, invertebrate/fungal	GO:0006952(InterPro)	-
Andrenidae	Andrena trimmerana	Def1	ENSFOKG00000011233	520885fed2b4cde007503b5132c4ff56	138	ProSiteProfiles	PS51378	Invertebrate defensins family profile.	86	126	10.259	TRUE	2025-06-26	IPR001542	Defensin, invertebrate/fungal	GO:0006952(InterPro)	-
Apidae	Anthophora plumipes	Def1	ENSHQCG00000001938	a2aa0584203cb06ade4646de6e5afc9e	110	Pfam	PF01097	Arthropod defensin	72	100	9.7E-6	TRUE	2025-06-26	IPR001542	Defensin, invertebrate/fungal	GO:0006952(InterPro)	-
Apidae	Anthophora plumipes	Def1	ENSHQCG00000001938	a2aa0584203cb06ade4646de6e5afc9e	110	ProSiteProfiles	PS51378	Invertebrate defensins family profile.	61	101	10.367	TRUE	2025-06-26	IPR001542	Defensin, invertebrate/fungal	GO:0006952(InterPro)	-
Apidae	Anthophora plumipes	Def1	ENSHQCG00000001938	a2aa0584203cb06ade4646de6e5afc9e	110	SUPERFAMILY	SSF57095	Scorpion toxin-like	62	101	7.49E-9	TRUE	2025-06-26	IPR036574	Knottin, scorpion toxin-like superfamily	-	-
Apidae	Anthophora plumipes	Def1	ENSHQCG00000001938	a2aa0584203cb06ade4646de6e5afc9e	110	Gene3D	G3DSA:3.30.30.10	-	62	102	5.7E-15	TRUE	2025-06-26	IPR036574	Knottin, scorpion toxin-like superfamily	-	-
Apidae	Apis dorsata	Def1	LOC102672730	bcfbc93a221303399489ed046461d7cb	95	Gene3D	G3DSA:3.30.30.10	-	44	84	5.5E-16	TRUE	2025-06-26	IPR036574	Knottin, scorpion toxin-like superfamily	-	-
Apidae	Apis dorsata	Def1	LOC102672730	bcfbc93a221303399489ed046461d7cb	95	SUPERFAMILY	SSF57095	Scorpion toxin-like	44	83	1.08E-9	TRUE	2025-06-26	IPR036574	Knottin, scorpion toxin-like superfamily	-	-
Apidae	Apis dorsata	Def1	LOC102672730	bcfbc93a221303399489ed046461d7cb	95	SMART	SM00505	gth 4	45	85	5.4E-5	TRUE	2025-06-26	IPR003614	Knottin, scorpion toxin-like	GO:0006952(InterPro)	-
Apidae	Apis dorsata	Def1	LOC102672730	bcfbc93a221303399489ed046461d7cb	95	Pfam	PF01097	Arthropod defensin	54	82	2.8E-8	TRUE	2025-06-26	IPR001542	Defensin, invertebrate/fungal	GO:0006952(InterPro)	-
Apidae	Apis dorsata	Def1	LOC102672730	bcfbc93a221303399489ed046461d7cb	95	PRINTS	PR00271	Defensin signature	55	64	2.8E-5	TRUE	2025-06-26	IPR017982	Defensin, insect	-	-
Apidae	Apis dorsata	Def1	LOC102672730	bcfbc93a221303399489ed046461d7cb	95	PRINTS	PR00271	Defensin signature	64	72	2.8E-5	TRUE	2025-06-26	IPR017982	Defensin, insect	-	-
Apidae	Apis dorsata	Def1	LOC102672730	bcfbc93a221303399489ed046461d7cb	95	PRINTS	PR00271	Defensin signature	72	81	2.8E-5	TRUE	2025-06-26	IPR017982	Defensin, insect	-	-
Apidae	Apis dorsata	Def1	LOC102672730	bcfbc93a221303399489ed046461d7cb	95	ProSiteProfiles	PS51378	Invertebrate defensins family profile.	43	83	10.737	TRUE	2025-06-26	IPR001542	Defensin, invertebrate/fungal	GO:0006952(InterPro)	-
Apidae	Apis florea	Def1	LOC100868088	a6dc87cd802eadf80302a92ed065a07f	94	Gene3D	G3DSA:3.30.30.10	-	43	82	7.1E-16	TRUE	2025-06-26	IPR036574	Knottin, scorpion toxin-like superfamily	-	-
Apidae	Apis florea	Def1	LOC100868088	a6dc87cd802eadf80302a92ed065a07f	94	ProSiteProfiles	PS51378	Invertebrate defensins family profile.	42	82	10.259	TRUE	2025-06-26	IPR001542	Defensin, invertebrate/fungal	GO:0006952(InterPro)	-
Apidae	Apis florea	Def1	LOC100868088	a6dc87cd802eadf80302a92ed065a07f	94	Pfam	PF01097	Arthropod defensin	53	81	8.2E-8	TRUE	2025-06-26	IPR001542	Defensin, invertebrate/fungal	GO:0006952(InterPro)	-
Apidae	Apis florea	Def1	LOC100868088	a6dc87cd802eadf80302a92ed065a07f	94	PRINTS	PR00271	Defensin signature	54	63	5.4E-5	TRUE	2025-06-26	IPR017982	Defensin, insect	-	-
Apidae	Apis florea	Def1	LOC100868088	a6dc87cd802eadf80302a92ed065a07f	94	PRINTS	PR00271	Defensin signature	63	71	5.4E-5	TRUE	2025-06-26	IPR017982	Defensin, insect	-	-
Apidae	Apis florea	Def1	LOC100868088	a6dc87cd802eadf80302a92ed065a07f	94	PRINTS	PR00271	Defensin signature	71	80	5.4E-5	TRUE	2025-06-26	IPR017982	Defensin, insect	-	-
Apidae	Apis florea	Def1	LOC100868088	a6dc87cd802eadf80302a92ed065a07f	94	SUPERFAMILY	SSF57095	Scorpion toxin-like	43	82	2.18E-9	TRUE	2025-06-26	IPR036574	Knottin, scorpion toxin-like superfamily	-	-
Apidae	Apis florea	Def1	LOC100868088	a6dc87cd802eadf80302a92ed065a07f	94	SMART	SM00505	gth 4	44	84	3.5E-4	TRUE	2025-06-26	IPR003614	Knottin, scorpion toxin-like	GO:0006952(InterPro)	-
Apidae	Apis mellifera	Def1	GeneID 406143	78fabddbab878c55cd8deede5cd2f01e	95	SUPERFAMILY	SSF57095	Scorpion toxin-like	44	83	7.36E-10	TRUE	2025-06-26	IPR036574	Knottin, scorpion toxin-like superfamily	-	-
Apidae	Apis mellifera	Def1	GeneID 406143	78fabddbab878c55cd8deede5cd2f01e	95	PRINTS	PR00271	Defensin signature	55	64	5.7E-6	TRUE	2025-06-26	IPR017982	Defensin, insect	-	-
Apidae	Apis mellifera	Def1	GeneID 406143	78fabddbab878c55cd8deede5cd2f01e	95	PRINTS	PR00271	Defensin signature	64	72	5.7E-6	TRUE	2025-06-26	IPR017982	Defensin, insect	-	-
Apidae	Apis mellifera	Def1	GeneID 406143	78fabddbab878c55cd8deede5cd2f01e	95	PRINTS	PR00271	Defensin signature	72	81	5.7E-6	TRUE	2025-06-26	IPR017982	Defensin, insect	-	-
Apidae	Apis mellifera	Def1	GeneID 406143	78fabddbab878c55cd8deede5cd2f01e	95	SMART	SM00505	gth 4	45	85	9.8E-6	TRUE	2025-06-26	IPR003614	Knottin, scorpion toxin-like	GO:0006952(InterPro)	-
Apidae	Apis mellifera	Def1	GeneID 406143	78fabddbab878c55cd8deede5cd2f01e	95	ProSiteProfiles	PS51378	Invertebrate defensins family profile.	43	83	10.8552	TRUE	2025-06-26	IPR001542	Defensin, invertebrate/fungal	GO:0006952(InterPro)	-
Apidae	Apis mellifera	Def1	GeneID 406143	78fabddbab878c55cd8deede5cd2f01e	95	Pfam	PF01097	Arthropod defensin	54	82	3.3E-9	TRUE	2025-06-26	IPR001542	Defensin, invertebrate/fungal	GO:0006952(InterPro)	-
Apidae	Apis mellifera	Def1	GeneID 406143	78fabddbab878c55cd8deede5cd2f01e	95	Gene3D	G3DSA:3.30.30.10	-	44	83	3.7E-16	TRUE	2025-06-26	IPR036574	Knottin, scorpion toxin-like superfamily	-	-
Apidae	Bombus affinis	Def1	LOC126915922	af6857584c76e04ad0dacdf561a85b7d	96	Pfam	PF01097	Arthropod defensin	55	83	3.2E-6	TRUE	2025-06-26	IPR001542	Defensin, invertebrate/fungal	GO:0006952(InterPro)	-
Apidae	Bombus affinis	Def1	LOC126915922	af6857584c76e04ad0dacdf561a85b7d	96	Gene3D	G3DSA:3.30.30.10	-	45	85	4.1E-15	TRUE	2025-06-26	IPR036574	Knottin, scorpion toxin-like superfamily	-	-
Apidae	Bombus affinis	Def1	LOC126915922	af6857584c76e04ad0dacdf561a85b7d	96	ProSiteProfiles	PS51378	Invertebrate defensins family profile.	44	84	10.4852	TRUE	2025-06-26	IPR001542	Defensin, invertebrate/fungal	GO:0006952(InterPro)	-
Apidae	Bombus affinis	Def1	LOC126915922	af6857584c76e04ad0dacdf561a85b7d	96	PRINTS	PR00271	Defensin signature	56	65	7.2E-5	TRUE	2025-06-26	IPR017982	Defensin, insect	-	-
Apidae	Bombus affinis	Def1	LOC126915922	af6857584c76e04ad0dacdf561a85b7d	96	PRINTS	PR00271	Defensin signature	65	73	7.2E-5	TRUE	2025-06-26	IPR017982	Defensin, insect	-	-
Apidae	Bombus affinis	Def1	LOC126915922	af6857584c76e04ad0dacdf561a85b7d	96	PRINTS	PR00271	Defensin signature	73	82	7.2E-5	TRUE	2025-06-26	IPR017982	Defensin, insect	-	-
Apidae	Bombus affinis	Def1	LOC126915922	af6857584c76e04ad0dacdf561a85b7d	96	SUPERFAMILY	SSF57095	Scorpion toxin-like	45	84	2.12E-9	TRUE	2025-06-26	IPR036574	Knottin, scorpion toxin-like superfamily	-	-
Apidae	Bombus bifarius	Def1	ENSBBSG00000002741	54195283847ecfce1b45c64c72493879	157	ProSiteProfiles	PS51378	Invertebrate defensins family profile.	105	145	10.4852	TRUE	2025-06-26	IPR001542	Defensin, invertebrate/fungal	GO:0006952(InterPro)	-
Apidae	Bombus bifarius	Def1	ENSBBSG00000002741	54195283847ecfce1b45c64c72493879	157	Gene3D	G3DSA:3.30.30.10	-	106	146	1.1E-14	TRUE	2025-06-26	IPR036574	Knottin, scorpion toxin-like superfamily	-	-
Apidae	Bombus bifarius	Def1	ENSBBSG00000002741	54195283847ecfce1b45c64c72493879	157	Pfam	PF01097	Arthropod defensin	116	144	7.8E-6	TRUE	2025-06-26	IPR001542	Defensin, invertebrate/fungal	GO:0006952(InterPro)	-
Apidae	Bombus bifarius	Def1	ENSBBSG00000002741	54195283847ecfce1b45c64c72493879	157	SUPERFAMILY	SSF57095	Scorpion toxin-like	106	145	5.87E-9	TRUE	2025-06-26	IPR036574	Knottin, scorpion toxin-like superfamily	-	-
Apidae	Bombus breviceps	Def1	ENSBBEG00000005290	43d70a00eb2afe0466e6f76e1dd1be21	159	Pfam	PF01097	Arthropod defensin	118	146	8.0E-6	TRUE	2025-06-26	IPR001542	Defensin, invertebrate/fungal	GO:0006952(InterPro)	-
Apidae	Bombus breviceps	Def1	ENSBBEG00000005290	43d70a00eb2afe0466e6f76e1dd1be21	159	SMART	SM00505	gth 4	109	149	0.0037	TRUE	2025-06-26	IPR003614	Knottin, scorpion toxin-like	GO:0006952(InterPro)	-
Apidae	Bombus breviceps	Def1	ENSBBEG00000005290	43d70a00eb2afe0466e6f76e1dd1be21	159	SUPERFAMILY	SSF57095	Scorpion toxin-like	108	147	5.97E-9	TRUE	2025-06-26	IPR036574	Knottin, scorpion toxin-like superfamily	-	-
Apidae	Bombus breviceps	Def1	ENSBBEG00000005290	43d70a00eb2afe0466e6f76e1dd1be21	159	Gene3D	G3DSA:3.30.30.10	-	108	148	1.1E-14	TRUE	2025-06-26	IPR036574	Knottin, scorpion toxin-like superfamily	-	-
Apidae	Bombus breviceps	Def1	ENSBBEG00000005290	43d70a00eb2afe0466e6f76e1dd1be21	159	ProSiteProfiles	PS51378	Invertebrate defensins family profile.	107	147	10.4852	TRUE	2025-06-26	IPR001542	Defensin, invertebrate/fungal	GO:0006952(InterPro)	-
Apidae	Bombus campestris	Def1	ENSBCMG00005032852	9fbc79240ebb487058840a407ebbc721	159	ProSiteProfiles	PS51378	Invertebrate defensins family profile.	107	147	10.367	TRUE	2025-06-26	IPR001542	Defensin, invertebrate/fungal	GO:0006952(InterPro)	-
Apidae	Bombus campestris	Def1	ENSBCMG00005032852	9fbc79240ebb487058840a407ebbc721	159	SUPERFAMILY	SSF57095	Scorpion toxin-like	108	147	8.96E-9	TRUE	2025-06-26	IPR036574	Knottin, scorpion toxin-like superfamily	-	-
Apidae	Bombus campestris	Def1	ENSBCMG00005032852	9fbc79240ebb487058840a407ebbc721	159	Pfam	PF01097	Arthropod defensin	118	146	1.8E-5	TRUE	2025-06-26	IPR001542	Defensin, invertebrate/fungal	GO:0006952(InterPro)	-
Apidae	Bombus campestris	Def1	ENSBCMG00005032852	9fbc79240ebb487058840a407ebbc721	159	Gene3D	G3DSA:3.30.30.10	-	108	148	1.8E-14	TRUE	2025-06-26	IPR036574	Knottin, scorpion toxin-like superfamily	-	-
Apidae	Bombus confusus	Def1	ENSBCFG00000002094	4a84be3eb664ccd853aca4c0a4f53d33	177	Pfam	PF01097	Arthropod defensin	136	164	2.2E-5	TRUE	2025-06-26	IPR001542	Defensin, invertebrate/fungal	GO:0006952(InterPro)	-
Apidae	Bombus confusus	Def1	ENSBCFG00000002094	4a84be3eb664ccd853aca4c0a4f53d33	177	Gene3D	G3DSA:3.30.30.10	-	126	166	2.2E-14	TRUE	2025-06-26	IPR036574	Knottin, scorpion toxin-like superfamily	-	-
Apidae	Bombus confusus	Def1	ENSBCFG00000002094	4a84be3eb664ccd853aca4c0a4f53d33	177	ProSiteProfiles	PS51378	Invertebrate defensins family profile.	125	165	10.367	TRUE	2025-06-26	IPR001542	Defensin, invertebrate/fungal	GO:0006952(InterPro)	-
Apidae	Bombus confusus	Def1	ENSBCFG00000002094	4a84be3eb664ccd853aca4c0a4f53d33	177	SUPERFAMILY	SSF57095	Scorpion toxin-like	126	165	1.09E-8	TRUE	2025-06-26	IPR036574	Knottin, scorpion toxin-like superfamily	-	-
Apidae	Bombus consobrinus	Def1	ENSBCSG00000005827	4ad523bf55432ecc38c7a24c8bcf118e	159	Pfam	PF01097	Arthropod defensin	118	146	8.0E-6	TRUE	2025-06-26	IPR001542	Defensin, invertebrate/fungal	GO:0006952(InterPro)	-
Apidae	Bombus consobrinus	Def1	ENSBCSG00000005827	4ad523bf55432ecc38c7a24c8bcf118e	159	Gene3D	G3DSA:3.30.30.10	-	108	148	1.1E-14	TRUE	2025-06-26	IPR036574	Knottin, scorpion toxin-like superfamily	-	-
Apidae	Bombus consobrinus	Def1	ENSBCSG00000005827	4ad523bf55432ecc38c7a24c8bcf118e	159	SUPERFAMILY	SSF57095	Scorpion toxin-like	108	147	6.29E-9	TRUE	2025-06-26	IPR036574	Knottin, scorpion toxin-like superfamily	-	-
Apidae	Bombus consobrinus	Def1	ENSBCSG00000005827	4ad523bf55432ecc38c7a24c8bcf118e	159	ProSiteProfiles	PS51378	Invertebrate defensins family profile.	107	147	10.4852	TRUE	2025-06-26	IPR001542	Defensin, invertebrate/fungal	GO:0006952(InterPro)	-
Apidae	Bombus cullumanus	Def1	ENSBCUG00000006369	20532f539076cbd0f9a3d7100ee0920a	159	SUPERFAMILY	SSF57095	Scorpion toxin-like	108	147	6.13E-9	TRUE	2025-06-26	IPR036574	Knottin, scorpion toxin-like superfamily	-	-
Apidae	Bombus cullumanus	Def1	ENSBCUG00000006369	20532f539076cbd0f9a3d7100ee0920a	159	Gene3D	G3DSA:3.30.30.10	-	108	148	1.1E-14	TRUE	2025-06-26	IPR036574	Knottin, scorpion toxin-like superfamily	-	-
Apidae	Bombus cullumanus	Def1	ENSBCUG00000006369	20532f539076cbd0f9a3d7100ee0920a	159	Pfam	PF01097	Arthropod defensin	118	146	8.0E-6	TRUE	2025-06-26	IPR001542	Defensin, invertebrate/fungal	GO:0006952(InterPro)	-
Apidae	Bombus cullumanus	Def1	ENSBCUG00000006369	20532f539076cbd0f9a3d7100ee0920a	159	ProSiteProfiles	PS51378	Invertebrate defensins family profile.	107	147	10.4852	TRUE	2025-06-26	IPR001542	Defensin, invertebrate/fungal	GO:0006952(InterPro)	-
Apidae	Bombus difficillimus	Def1	ENSBDIG00000002474	20187d65446601b28ae65572ec394caa	104	PRINTS	PR00271	Defensin signature	64	73	8.2E-5	TRUE	2025-06-26	IPR017982	Defensin, insect	-	-
Apidae	Bombus difficillimus	Def1	ENSBDIG00000002474	20187d65446601b28ae65572ec394caa	104	PRINTS	PR00271	Defensin signature	73	81	8.2E-5	TRUE	2025-06-26	IPR017982	Defensin, insect	-	-
Apidae	Bombus difficillimus	Def1	ENSBDIG00000002474	20187d65446601b28ae65572ec394caa	104	PRINTS	PR00271	Defensin signature	81	90	8.2E-5	TRUE	2025-06-26	IPR017982	Defensin, insect	-	-
Apidae	Bombus difficillimus	Def1	ENSBDIG00000002474	20187d65446601b28ae65572ec394caa	104	ProSiteProfiles	PS51378	Invertebrate defensins family profile.	52	92	10.4852	TRUE	2025-06-26	IPR001542	Defensin, invertebrate/fungal	GO:0006952(InterPro)	-
Apidae	Bombus difficillimus	Def1	ENSBDIG00000002474	20187d65446601b28ae65572ec394caa	104	Pfam	PF01097	Arthropod defensin	63	91	3.8E-6	TRUE	2025-06-26	IPR001542	Defensin, invertebrate/fungal	GO:0006952(InterPro)	-
Apidae	Bombus difficillimus	Def1	ENSBDIG00000002474	20187d65446601b28ae65572ec394caa	104	SUPERFAMILY	SSF57095	Scorpion toxin-like	53	92	2.16E-9	TRUE	2025-06-26	IPR036574	Knottin, scorpion toxin-like superfamily	-	-
Apidae	Bombus difficillimus	Def1	ENSBDIG00000002474	20187d65446601b28ae65572ec394caa	104	Gene3D	G3DSA:3.30.30.10	-	53	93	3.1E-15	TRUE	2025-06-26	IPR036574	Knottin, scorpion toxin-like superfamily	-	-
Apidae	Bombus haemorrhoidalis	Def1	ENSBHAG00000008248	91cdebf54708d41f51237dcddf5589b0	96	Pfam	PF01097	Arthropod defensin	55	83	3.2E-6	TRUE	2025-06-26	IPR001542	Defensin, invertebrate/fungal	GO:0006952(InterPro)	-
Apidae	Bombus haemorrhoidalis	Def1	ENSBHAG00000008248	91cdebf54708d41f51237dcddf5589b0	96	Gene3D	G3DSA:3.30.30.10	-	45	85	4.1E-15	TRUE	2025-06-26	IPR036574	Knottin, scorpion toxin-like superfamily	-	-
Apidae	Bombus haemorrhoidalis	Def1	ENSBHAG00000008248	91cdebf54708d41f51237dcddf5589b0	96	ProSiteProfiles	PS51378	Invertebrate defensins family profile.	44	84	10.4852	TRUE	2025-06-26	IPR001542	Defensin, invertebrate/fungal	GO:0006952(InterPro)	-
Apidae	Bombus haemorrhoidalis	Def1	ENSBHAG00000008248	91cdebf54708d41f51237dcddf5589b0	96	PRINTS	PR00271	Defensin signature	56	65	7.2E-5	TRUE	2025-06-26	IPR017982	Defensin, insect	-	-
Apidae	Bombus haemorrhoidalis	Def1	ENSBHAG00000008248	91cdebf54708d41f51237dcddf5589b0	96	PRINTS	PR00271	Defensin signature	65	73	7.2E-5	TRUE	2025-06-26	IPR017982	Defensin, insect	-	-
Apidae	Bombus haemorrhoidalis	Def1	ENSBHAG00000008248	91cdebf54708d41f51237dcddf5589b0	96	PRINTS	PR00271	Defensin signature	73	82	7.2E-5	TRUE	2025-06-26	IPR017982	Defensin, insect	-	-
Apidae	Bombus haemorrhoidalis	Def1	ENSBHAG00000008248	91cdebf54708d41f51237dcddf5589b0	96	SUPERFAMILY	SSF57095	Scorpion toxin-like	45	84	2.12E-9	TRUE	2025-06-26	IPR036574	Knottin, scorpion toxin-like superfamily	-	-
Apidae	Bombus hortorum	Def1	ENSBHTG00000010217	704d12edcf7acea9022592253e5fb2aa	159	ProSiteProfiles	PS51378	Invertebrate defensins family profile.	107	147	10.367	TRUE	2025-06-26	IPR001542	Defensin, invertebrate/fungal	GO:0006952(InterPro)	-
Apidae	Bombus hortorum	Def1	ENSBHTG00000010217	704d12edcf7acea9022592253e5fb2aa	159	Pfam	PF01097	Arthropod defensin	118	146	1.8E-5	TRUE	2025-06-26	IPR001542	Defensin, invertebrate/fungal	GO:0006952(InterPro)	-
Apidae	Bombus hortorum	Def1	ENSBHTG00000010217	704d12edcf7acea9022592253e5fb2aa	159	SUPERFAMILY	SSF57095	Scorpion toxin-like	108	147	9.19E-9	TRUE	2025-06-26	IPR036574	Knottin, scorpion toxin-like superfamily	-	-
Apidae	Bombus hortorum	Def1	ENSBHTG00000010217	704d12edcf7acea9022592253e5fb2aa	159	Gene3D	G3DSA:3.30.30.10	-	108	148	1.8E-14	TRUE	2025-06-26	IPR036574	Knottin, scorpion toxin-like superfamily	-	-
Apidae	Bombus huntii	Def1	LOC126877447	031d5022ccaf559b28ae57aacbe60d50	157	ProSiteProfiles	PS51378	Invertebrate defensins family profile.	105	145	10.4852	TRUE	2025-06-26	IPR001542	Defensin, invertebrate/fungal	GO:0006952(InterPro)	-
Apidae	Bombus huntii	Def1	LOC126877447	031d5022ccaf559b28ae57aacbe60d50	157	Pfam	PF01097	Arthropod defensin	116	144	7.8E-6	TRUE	2025-06-26	IPR001542	Defensin, invertebrate/fungal	GO:0006952(InterPro)	-
Apidae	Bombus huntii	Def1	LOC126877447	031d5022ccaf559b28ae57aacbe60d50	157	SUPERFAMILY	SSF57095	Scorpion toxin-like	106	145	5.87E-9	TRUE	2025-06-26	IPR036574	Knottin, scorpion toxin-like superfamily	-	-
Apidae	Bombus huntii	Def1	LOC126877447	031d5022ccaf559b28ae57aacbe60d50	157	Gene3D	G3DSA:3.30.30.10	-	106	146	1.1E-14	TRUE	2025-06-26	IPR036574	Knottin, scorpion toxin-like superfamily	-	-
Apidae	Bombus hypnorum	Def1	ENSBHYG00000011186	3140265305200733371096ecae507da2	159	SUPERFAMILY	SSF57095	Scorpion toxin-like	108	147	6.13E-9	TRUE	2025-06-26	IPR036574	Knottin, scorpion toxin-like superfamily	-	-
Apidae	Bombus hypnorum	Def1	ENSBHYG00000011186	3140265305200733371096ecae507da2	159	Gene3D	G3DSA:3.30.30.10	-	108	148	1.1E-14	TRUE	2025-06-26	IPR036574	Knottin, scorpion toxin-like superfamily	-	-
Apidae	Bombus hypnorum	Def1	ENSBHYG00000011186	3140265305200733371096ecae507da2	159	ProSiteProfiles	PS51378	Invertebrate defensins family profile.	107	147	10.4852	TRUE	2025-06-26	IPR001542	Defensin, invertebrate/fungal	GO:0006952(InterPro)	-
Apidae	Bombus hypnorum	Def1	ENSBHYG00000011186	3140265305200733371096ecae507da2	159	Pfam	PF01097	Arthropod defensin	118	146	8.0E-6	TRUE	2025-06-26	IPR001542	Defensin, invertebrate/fungal	GO:0006952(InterPro)	-
Apidae	Bombus ignitus	Def1	ENSBIGG00000007343	b5170557205fdad19059f9598c874ef2	159	SUPERFAMILY	SSF57095	Scorpion toxin-like	108	147	6.13E-9	TRUE	2025-06-26	IPR036574	Knottin, scorpion toxin-like superfamily	-	-
Apidae	Bombus ignitus	Def1	ENSBIGG00000007343	b5170557205fdad19059f9598c874ef2	159	Gene3D	G3DSA:3.30.30.10	-	108	148	1.1E-14	TRUE	2025-06-26	IPR036574	Knottin, scorpion toxin-like superfamily	-	-
Apidae	Bombus ignitus	Def1	ENSBIGG00000007343	b5170557205fdad19059f9598c874ef2	159	ProSiteProfiles	PS51378	Invertebrate defensins family profile.	107	147	10.4852	TRUE	2025-06-26	IPR001542	Defensin, invertebrate/fungal	GO:0006952(InterPro)	-
Apidae	Bombus ignitus	Def1	ENSBIGG00000007343	b5170557205fdad19059f9598c874ef2	159	Pfam	PF01097	Arthropod defensin	118	146	8.0E-6	TRUE	2025-06-26	IPR001542	Defensin, invertebrate/fungal	GO:0006952(InterPro)	-
Apidae	Bombus impatiens	Def1	LOC100744436	472f8f35f8ee389abf301c10ee1969a1	157	ProSiteProfiles	PS51378	Invertebrate defensins family profile.	105	145	10.4852	TRUE	2025-06-26	IPR001542	Defensin, invertebrate/fungal	GO:0006952(InterPro)	-
Apidae	Bombus impatiens	Def1	LOC100744436	472f8f35f8ee389abf301c10ee1969a1	157	Gene3D	G3DSA:3.30.30.10	-	106	146	1.1E-14	TRUE	2025-06-26	IPR036574	Knottin, scorpion toxin-like superfamily	-	-
Apidae	Bombus impatiens	Def1	LOC100744436	472f8f35f8ee389abf301c10ee1969a1	157	Pfam	PF01097	Arthropod defensin	116	144	7.8E-6	TRUE	2025-06-26	IPR001542	Defensin, invertebrate/fungal	GO:0006952(InterPro)	-
Apidae	Bombus impatiens	Def1	LOC100744436	472f8f35f8ee389abf301c10ee1969a1	157	SUPERFAMILY	SSF57095	Scorpion toxin-like	106	145	5.87E-9	TRUE	2025-06-26	IPR036574	Knottin, scorpion toxin-like superfamily	-	-
Apidae	Bombus muscorum	Def1	ENSAMQG00000004973	c17d3add17eb8833c8e4be937786f066	159	ProSiteProfiles	PS51378	Invertebrate defensins family profile.	107	147	10.367	TRUE	2025-06-26	IPR001542	Defensin, invertebrate/fungal	GO:0006952(InterPro)	-
Apidae	Bombus muscorum	Def1	ENSAMQG00000004973	c17d3add17eb8833c8e4be937786f066	159	SUPERFAMILY	SSF57095	Scorpion toxin-like	108	147	8.96E-9	TRUE	2025-06-26	IPR036574	Knottin, scorpion toxin-like superfamily	-	-
Apidae	Bombus muscorum	Def1	ENSAMQG00000004973	c17d3add17eb8833c8e4be937786f066	159	Gene3D	G3DSA:3.30.30.10	-	108	148	1.8E-14	TRUE	2025-06-26	IPR036574	Knottin, scorpion toxin-like superfamily	-	-
Apidae	Bombus muscorum	Def1	ENSAMQG00000004973	c17d3add17eb8833c8e4be937786f066	159	Pfam	PF01097	Arthropod defensin	118	146	1.8E-5	TRUE	2025-06-26	IPR001542	Defensin, invertebrate/fungal	GO:0006952(InterPro)	-
Apidae	Bombus opulentus	Def1	ENSBOPG00000001212	7e466b83cf0fe95ae41ab06c8b27835c	159	ProSiteProfiles	PS51378	Invertebrate defensins family profile.	107	147	10.367	TRUE	2025-06-26	IPR001542	Defensin, invertebrate/fungal	GO:0006952(InterPro)	-
Apidae	Bombus opulentus	Def1	ENSBOPG00000001212	7e466b83cf0fe95ae41ab06c8b27835c	159	SUPERFAMILY	SSF57095	Scorpion toxin-like	108	147	8.96E-9	TRUE	2025-06-26	IPR036574	Knottin, scorpion toxin-like superfamily	-	-
Apidae	Bombus opulentus	Def1	ENSBOPG00000001212	7e466b83cf0fe95ae41ab06c8b27835c	159	Pfam	PF01097	Arthropod defensin	118	146	1.8E-5	TRUE	2025-06-26	IPR001542	Defensin, invertebrate/fungal	GO:0006952(InterPro)	-
Apidae	Bombus opulentus	Def1	ENSBOPG00000001212	7e466b83cf0fe95ae41ab06c8b27835c	159	Gene3D	G3DSA:3.30.30.10	-	108	148	1.8E-14	TRUE	2025-06-26	IPR036574	Knottin, scorpion toxin-like superfamily	-	-
Apidae	Bombus pascuorum	Def1	ENSBPAG00000005239	19ba9d16b26f1144f2b877257da20659	159	ProSiteProfiles	PS51378	Invertebrate defensins family profile.	107	147	10.367	TRUE	2025-06-26	IPR001542	Defensin, invertebrate/fungal	GO:0006952(InterPro)	-
Apidae	Bombus pascuorum	Def1	ENSBPAG00000005239	19ba9d16b26f1144f2b877257da20659	159	SUPERFAMILY	SSF57095	Scorpion toxin-like	108	147	8.96E-9	TRUE	2025-06-26	IPR036574	Knottin, scorpion toxin-like superfamily	-	-
Apidae	Bombus pascuorum	Def1	ENSBPAG00000005239	19ba9d16b26f1144f2b877257da20659	159	Pfam	PF01097	Arthropod defensin	118	146	1.8E-5	TRUE	2025-06-26	IPR001542	Defensin, invertebrate/fungal	GO:0006952(InterPro)	-
Apidae	Bombus pascuorum	Def1	ENSBPAG00000005239	19ba9d16b26f1144f2b877257da20659	159	Gene3D	G3DSA:3.30.30.10	-	108	148	1.8E-14	TRUE	2025-06-26	IPR036574	Knottin, scorpion toxin-like superfamily	-	-
Apidae	Bombus picipes	Def1	ENSBPIG00000006801	20cb7d62138040b4f1c629a58e8a9bd1	96	Pfam	PF01097	Arthropod defensin	55	83	3.2E-6	TRUE	2025-06-26	IPR001542	Defensin, invertebrate/fungal	GO:0006952(InterPro)	-
Apidae	Bombus picipes	Def1	ENSBPIG00000006801	20cb7d62138040b4f1c629a58e8a9bd1	96	Gene3D	G3DSA:3.30.30.10	-	45	85	4.1E-15	TRUE	2025-06-26	IPR036574	Knottin, scorpion toxin-like superfamily	-	-
Apidae	Bombus picipes	Def1	ENSBPIG00000006801	20cb7d62138040b4f1c629a58e8a9bd1	96	ProSiteProfiles	PS51378	Invertebrate defensins family profile.	44	84	10.4852	TRUE	2025-06-26	IPR001542	Defensin, invertebrate/fungal	GO:0006952(InterPro)	-
Apidae	Bombus picipes	Def1	ENSBPIG00000006801	20cb7d62138040b4f1c629a58e8a9bd1	96	PRINTS	PR00271	Defensin signature	56	65	7.2E-5	TRUE	2025-06-26	IPR017982	Defensin, insect	-	-
Apidae	Bombus picipes	Def1	ENSBPIG00000006801	20cb7d62138040b4f1c629a58e8a9bd1	96	PRINTS	PR00271	Defensin signature	65	73	7.2E-5	TRUE	2025-06-26	IPR017982	Defensin, insect	-	-
Apidae	Bombus picipes	Def1	ENSBPIG00000006801	20cb7d62138040b4f1c629a58e8a9bd1	96	PRINTS	PR00271	Defensin signature	73	82	7.2E-5	TRUE	2025-06-26	IPR017982	Defensin, insect	-	-
Apidae	Bombus picipes	Def1	ENSBPIG00000006801	20cb7d62138040b4f1c629a58e8a9bd1	96	SUPERFAMILY	SSF57095	Scorpion toxin-like	45	84	2.12E-9	TRUE	2025-06-26	IPR036574	Knottin, scorpion toxin-like superfamily	-	-
Apidae	Bombus polaris	Def1	ENSBPOG00000009949	4360e0b9ff4c0894fbbc1114f9512ac8	96	Pfam	PF01097	Arthropod defensin	55	83	3.2E-6	TRUE	2025-06-26	IPR001542	Defensin, invertebrate/fungal	GO:0006952(InterPro)	-
Apidae	Bombus polaris	Def1	ENSBPOG00000009949	4360e0b9ff4c0894fbbc1114f9512ac8	96	Gene3D	G3DSA:3.30.30.10	-	45	85	4.1E-15	TRUE	2025-06-26	IPR036574	Knottin, scorpion toxin-like superfamily	-	-
Apidae	Bombus polaris	Def1	ENSBPOG00000009949	4360e0b9ff4c0894fbbc1114f9512ac8	96	ProSiteProfiles	PS51378	Invertebrate defensins family profile.	44	84	10.4852	TRUE	2025-06-26	IPR001542	Defensin, invertebrate/fungal	GO:0006952(InterPro)	-
Apidae	Bombus polaris	Def1	ENSBPOG00000009949	4360e0b9ff4c0894fbbc1114f9512ac8	96	PRINTS	PR00271	Defensin signature	56	65	7.2E-5	TRUE	2025-06-26	IPR017982	Defensin, insect	-	-
Apidae	Bombus polaris	Def1	ENSBPOG00000009949	4360e0b9ff4c0894fbbc1114f9512ac8	96	PRINTS	PR00271	Defensin signature	65	73	7.2E-5	TRUE	2025-06-26	IPR017982	Defensin, insect	-	-
Apidae	Bombus polaris	Def1	ENSBPOG00000009949	4360e0b9ff4c0894fbbc1114f9512ac8	96	PRINTS	PR00271	Defensin signature	73	82	7.2E-5	TRUE	2025-06-26	IPR017982	Defensin, insect	-	-
Apidae	Bombus polaris	Def1	ENSBPOG00000009949	4360e0b9ff4c0894fbbc1114f9512ac8	96	SUPERFAMILY	SSF57095	Scorpion toxin-like	45	84	2.12E-9	TRUE	2025-06-26	IPR036574	Knottin, scorpion toxin-like superfamily	-	-
Apidae	Bombus pratorum	Def1	ENSBPTG00005009504	3a59033e4dc8330ec3d22c90f2556f9a	159	SUPERFAMILY	SSF57095	Scorpion toxin-like	108	147	6.13E-9	TRUE	2025-06-26	IPR036574	Knottin, scorpion toxin-like superfamily	-	-
Apidae	Bombus pratorum	Def1	ENSBPTG00005009504	3a59033e4dc8330ec3d22c90f2556f9a	159	Gene3D	G3DSA:3.30.30.10	-	108	148	1.1E-14	TRUE	2025-06-26	IPR036574	Knottin, scorpion toxin-like superfamily	-	-
Apidae	Bombus pratorum	Def1	ENSBPTG00005009504	3a59033e4dc8330ec3d22c90f2556f9a	159	Pfam	PF01097	Arthropod defensin	118	146	8.0E-6	TRUE	2025-06-26	IPR001542	Defensin, invertebrate/fungal	GO:0006952(InterPro)	-
Apidae	Bombus pratorum	Def1	ENSBPTG00005009504	3a59033e4dc8330ec3d22c90f2556f9a	159	ProSiteProfiles	PS51378	Invertebrate defensins family profile.	107	147	10.4852	TRUE	2025-06-26	IPR001542	Defensin, invertebrate/fungal	GO:0006952(InterPro)	-
Apidae	Bombus pyrosoma	Def1	ENSBPYG00000012617	bdb0bffd975a5c076d6f38e8002ce8ba	159	ProSiteProfiles	PS51378	Invertebrate defensins family profile.	107	147	10.367	TRUE	2025-06-26	IPR001542	Defensin, invertebrate/fungal	GO:0006952(InterPro)	-
Apidae	Bombus pyrosoma	Def1	ENSBPYG00000012617	bdb0bffd975a5c076d6f38e8002ce8ba	159	SUPERFAMILY	SSF57095	Scorpion toxin-like	108	147	8.96E-9	TRUE	2025-06-26	IPR036574	Knottin, scorpion toxin-like superfamily	-	-
Apidae	Bombus pyrosoma	Def1	ENSBPYG00000012617	bdb0bffd975a5c076d6f38e8002ce8ba	159	Pfam	PF01097	Arthropod defensin	118	146	1.8E-5	TRUE	2025-06-26	IPR001542	Defensin, invertebrate/fungal	GO:0006952(InterPro)	-
Apidae	Bombus pyrosoma	Def1	ENSBPYG00000012617	bdb0bffd975a5c076d6f38e8002ce8ba	159	Gene3D	G3DSA:3.30.30.10	-	108	148	1.8E-14	TRUE	2025-06-26	IPR036574	Knottin, scorpion toxin-like superfamily	-	-
Apidae	Bombus sibiricus	Def1	ENSBSBG00000004076	5e0164d7dd1776f2ca1aa17ac8993158	101	PRINTS	PR00271	Defensin signature	61	70	9.7E-5	TRUE	2025-06-26	IPR017982	Defensin, insect	-	-
Apidae	Bombus sibiricus	Def1	ENSBSBG00000004076	5e0164d7dd1776f2ca1aa17ac8993158	101	PRINTS	PR00271	Defensin signature	70	78	9.7E-5	TRUE	2025-06-26	IPR017982	Defensin, insect	-	-
Apidae	Bombus sibiricus	Def1	ENSBSBG00000004076	5e0164d7dd1776f2ca1aa17ac8993158	101	PRINTS	PR00271	Defensin signature	78	87	9.7E-5	TRUE	2025-06-26	IPR017982	Defensin, insect	-	-
Apidae	Bombus sibiricus	Def1	ENSBSBG00000004076	5e0164d7dd1776f2ca1aa17ac8993158	101	SUPERFAMILY	SSF57095	Scorpion toxin-like	50	89	2.95E-9	TRUE	2025-06-26	IPR036574	Knottin, scorpion toxin-like superfamily	-	-
Apidae	Bombus sibiricus	Def1	ENSBSBG00000004076	5e0164d7dd1776f2ca1aa17ac8993158	101	Pfam	PF01097	Arthropod defensin	60	88	8.2E-6	TRUE	2025-06-26	IPR001542	Defensin, invertebrate/fungal	GO:0006952(InterPro)	-
Apidae	Bombus sibiricus	Def1	ENSBSBG00000004076	5e0164d7dd1776f2ca1aa17ac8993158	101	ProSiteProfiles	PS51378	Invertebrate defensins family profile.	49	89	10.367	TRUE	2025-06-26	IPR001542	Defensin, invertebrate/fungal	GO:0006952(InterPro)	-
Apidae	Bombus sibiricus	Def1	ENSBSBG00000004076	5e0164d7dd1776f2ca1aa17ac8993158	101	Gene3D	G3DSA:3.30.30.10	-	50	90	4.7E-15	TRUE	2025-06-26	IPR036574	Knottin, scorpion toxin-like superfamily	-	-
Apidae	Bombus skorikovi	Def1	ENSBSKG00000008549	a990670a84c7938d15a077053755ca3e	107	Pfam	PF01097	Arthropod defensin	59	87	9.2E-6	TRUE	2025-06-26	IPR001542	Defensin, invertebrate/fungal	GO:0006952(InterPro)	-
Apidae	Bombus skorikovi	Def1	ENSBSKG00000008549	a990670a84c7938d15a077053755ca3e	107	Gene3D	G3DSA:3.30.30.10	-	49	89	5.4E-15	TRUE	2025-06-26	IPR036574	Knottin, scorpion toxin-like superfamily	-	-
Apidae	Bombus skorikovi	Def1	ENSBSKG00000008549	a990670a84c7938d15a077053755ca3e	107	SUPERFAMILY	SSF57095	Scorpion toxin-like	49	88	3.3E-9	TRUE	2025-06-26	IPR036574	Knottin, scorpion toxin-like superfamily	-	-
Apidae	Bombus skorikovi	Def1	ENSBSKG00000008549	a990670a84c7938d15a077053755ca3e	107	ProSiteProfiles	PS51378	Invertebrate defensins family profile.	48	88	10.367	TRUE	2025-06-26	IPR001542	Defensin, invertebrate/fungal	GO:0006952(InterPro)	-
Apidae	Bombus soroeensis	Def1	ENSBSOG00000009724	24b6fcc55448b0c2c13bd6416fd409bf	96	Pfam	PF01097	Arthropod defensin	55	83	3.2E-6	TRUE	2025-06-26	IPR001542	Defensin, invertebrate/fungal	GO:0006952(InterPro)	-
Apidae	Bombus soroeensis	Def1	ENSBSOG00000009724	24b6fcc55448b0c2c13bd6416fd409bf	96	Gene3D	G3DSA:3.30.30.10	-	45	85	4.1E-15	TRUE	2025-06-26	IPR036574	Knottin, scorpion toxin-like superfamily	-	-
Apidae	Bombus soroeensis	Def1	ENSBSOG00000009724	24b6fcc55448b0c2c13bd6416fd409bf	96	ProSiteProfiles	PS51378	Invertebrate defensins family profile.	44	84	10.4852	TRUE	2025-06-26	IPR001542	Defensin, invertebrate/fungal	GO:0006952(InterPro)	-
Apidae	Bombus soroeensis	Def1	ENSBSOG00000009724	24b6fcc55448b0c2c13bd6416fd409bf	96	PRINTS	PR00271	Defensin signature	56	65	7.2E-5	TRUE	2025-06-26	IPR017982	Defensin, insect	-	-
Apidae	Bombus soroeensis	Def1	ENSBSOG00000009724	24b6fcc55448b0c2c13bd6416fd409bf	96	PRINTS	PR00271	Defensin signature	65	73	7.2E-5	TRUE	2025-06-26	IPR017982	Defensin, insect	-	-
Apidae	Bombus soroeensis	Def1	ENSBSOG00000009724	24b6fcc55448b0c2c13bd6416fd409bf	96	PRINTS	PR00271	Defensin signature	73	82	7.2E-5	TRUE	2025-06-26	IPR017982	Defensin, insect	-	-
Apidae	Bombus soroeensis	Def1	ENSBSOG00000009724	24b6fcc55448b0c2c13bd6416fd409bf	96	SUPERFAMILY	SSF57095	Scorpion toxin-like	45	84	2.06E-9	TRUE	2025-06-26	IPR036574	Knottin, scorpion toxin-like superfamily	-	-
Apidae	Bombus superbus	Def1	ENSBSUG00000000940	90430c9fc502ee69c7de5379849c9c0e	160	Gene3D	G3DSA:3.30.30.10	-	109	149	2.1E-14	TRUE	2025-06-26	IPR036574	Knottin, scorpion toxin-like superfamily	-	-
Apidae	Bombus superbus	Def1	ENSBSUG00000000940	90430c9fc502ee69c7de5379849c9c0e	160	Pfam	PF01097	Arthropod defensin	121	147	2.1E-5	TRUE	2025-06-26	IPR001542	Defensin, invertebrate/fungal	GO:0006952(InterPro)	-
Apidae	Bombus superbus	Def1	ENSBSUG00000000940	90430c9fc502ee69c7de5379849c9c0e	160	ProSiteProfiles	PS51378	Invertebrate defensins family profile.	108	148	10.367	TRUE	2025-06-26	IPR001542	Defensin, invertebrate/fungal	GO:0006952(InterPro)	-
Apidae	Bombus superbus	Def1	ENSBSUG00000000940	90430c9fc502ee69c7de5379849c9c0e	160	SUPERFAMILY	SSF57095	Scorpion toxin-like	109	148	1.07E-8	TRUE	2025-06-26	IPR036574	Knottin, scorpion toxin-like superfamily	-	-
Apidae	Bombus sylvestris	Def1	ENSBSYG00000014024	35c548e0469b382f93ddbbe1a2bf4299	96	Gene3D	G3DSA:3.30.30.10	-	45	85	6.6E-15	TRUE	2025-06-26	IPR036574	Knottin, scorpion toxin-like superfamily	-	-
Apidae	Bombus sylvestris	Def1	ENSBSYG00000014024	35c548e0469b382f93ddbbe1a2bf4299	96	PRINTS	PR00271	Defensin signature	56	65	8.9E-5	TRUE	2025-06-26	IPR017982	Defensin, insect	-	-
Apidae	Bombus sylvestris	Def1	ENSBSYG00000014024	35c548e0469b382f93ddbbe1a2bf4299	96	PRINTS	PR00271	Defensin signature	65	73	8.9E-5	TRUE	2025-06-26	IPR017982	Defensin, insect	-	-
Apidae	Bombus sylvestris	Def1	ENSBSYG00000014024	35c548e0469b382f93ddbbe1a2bf4299	96	PRINTS	PR00271	Defensin signature	73	82	8.9E-5	TRUE	2025-06-26	IPR017982	Defensin, insect	-	-
Apidae	Bombus sylvestris	Def1	ENSBSYG00000014024	35c548e0469b382f93ddbbe1a2bf4299	96	ProSiteProfiles	PS51378	Invertebrate defensins family profile.	44	84	10.367	TRUE	2025-06-26	IPR001542	Defensin, invertebrate/fungal	GO:0006952(InterPro)	-
Apidae	Bombus sylvestris	Def1	ENSBSYG00000014024	35c548e0469b382f93ddbbe1a2bf4299	96	SUPERFAMILY	SSF57095	Scorpion toxin-like	45	84	2.93E-9	TRUE	2025-06-26	IPR036574	Knottin, scorpion toxin-like superfamily	-	-
Apidae	Bombus sylvestris	Def1	ENSBSYG00000014024	35c548e0469b382f93ddbbe1a2bf4299	96	Pfam	PF01097	Arthropod defensin	55	83	7.4E-6	TRUE	2025-06-26	IPR001542	Defensin, invertebrate/fungal	GO:0006952(InterPro)	-
Apidae	Bombus terrestris	Def1	Def	47a810cfd17288bf4ebe7025c95dfb03	96	Pfam	PF01097	Arthropod defensin	55	83	2.5E-6	TRUE	2025-06-26	IPR001542	Defensin, invertebrate/fungal	GO:0006952(InterPro)	-
Apidae	Bombus terrestris	Def1	Def	47a810cfd17288bf4ebe7025c95dfb03	96	ProSiteProfiles	PS51378	Invertebrate defensins family profile.	44	84	10.3721	TRUE	2025-06-26	IPR001542	Defensin, invertebrate/fungal	GO:0006952(InterPro)	-
Apidae	Bombus terrestris	Def1	Def	47a810cfd17288bf4ebe7025c95dfb03	96	PRINTS	PR00271	Defensin signature	56	65	8.0E-5	TRUE	2025-06-26	IPR017982	Defensin, insect	-	-
Apidae	Bombus terrestris	Def1	Def	47a810cfd17288bf4ebe7025c95dfb03	96	PRINTS	PR00271	Defensin signature	65	73	8.0E-5	TRUE	2025-06-26	IPR017982	Defensin, insect	-	-
Apidae	Bombus terrestris	Def1	Def	47a810cfd17288bf4ebe7025c95dfb03	96	PRINTS	PR00271	Defensin signature	73	82	8.0E-5	TRUE	2025-06-26	IPR017982	Defensin, insect	-	-
Apidae	Bombus terrestris	Def1	Def	47a810cfd17288bf4ebe7025c95dfb03	96	SUPERFAMILY	SSF57095	Scorpion toxin-like	45	84	2.16E-9	TRUE	2025-06-26	IPR036574	Knottin, scorpion toxin-like superfamily	-	-
Apidae	Bombus terrestris	Def1	Def	47a810cfd17288bf4ebe7025c95dfb03	96	Gene3D	G3DSA:3.30.30.10	-	45	85	1.2E-14	TRUE	2025-06-26	IPR036574	Knottin, scorpion toxin-like superfamily	-	-
Apidae	Bombus turneri	Def1	ENSBTNG00000010547	1787eb95470204d266de9b99462842e1	178	Gene3D	G3DSA:3.30.30.10	-	127	167	1.4E-14	TRUE	2025-06-26	IPR036574	Knottin, scorpion toxin-like superfamily	-	-
Apidae	Bombus turneri	Def1	ENSBTNG00000010547	1787eb95470204d266de9b99462842e1	178	ProSiteProfiles	PS51378	Invertebrate defensins family profile.	126	166	10.367	TRUE	2025-06-26	IPR001542	Defensin, invertebrate/fungal	GO:0006952(InterPro)	-
Apidae	Bombus turneri	Def1	ENSBTNG00000010547	1787eb95470204d266de9b99462842e1	178	SUPERFAMILY	SSF57095	Scorpion toxin-like	127	166	1.04E-8	TRUE	2025-06-26	IPR036574	Knottin, scorpion toxin-like superfamily	-	-
Apidae	Bombus turneri	Def1	ENSBTNG00000010547	1787eb95470204d266de9b99462842e1	178	Pfam	PF01097	Arthropod defensin	137	165	2.2E-5	TRUE	2025-06-26	IPR001542	Defensin, invertebrate/fungal	GO:0006952(InterPro)	-
Apidae	Bombus turneri	Def1	ENSBTNG00000010689	e3f4321a0c3691afa224f9d30f419bd9	110	Pfam	PF01097	Arthropod defensin	69	97	9.7E-6	TRUE	2025-06-26	IPR001542	Defensin, invertebrate/fungal	GO:0006952(InterPro)	-
Apidae	Bombus turneri	Def1	ENSBTNG00000010689	e3f4321a0c3691afa224f9d30f419bd9	110	Gene3D	G3DSA:3.30.30.10	-	59	99	5.7E-15	TRUE	2025-06-26	IPR036574	Knottin, scorpion toxin-like superfamily	-	-
Apidae	Bombus turneri	Def1	ENSBTNG00000010689	e3f4321a0c3691afa224f9d30f419bd9	110	ProSiteProfiles	PS51378	Invertebrate defensins family profile.	58	98	10.367	TRUE	2025-06-26	IPR001542	Defensin, invertebrate/fungal	GO:0006952(InterPro)	-
Apidae	Bombus turneri	Def1	ENSBTNG00000010689	e3f4321a0c3691afa224f9d30f419bd9	110	SUPERFAMILY	SSF57095	Scorpion toxin-like	59	98	3.59E-9	TRUE	2025-06-26	IPR036574	Knottin, scorpion toxin-like superfamily	-	-
Apidae	Bombus vancouverensis	Def1	LOC117166690	11885f6de0c3085c34a42733af5dceae	96	Pfam	PF01097	Arthropod defensin	55	83	3.2E-6	TRUE	2025-06-26	IPR001542	Defensin, invertebrate/fungal	GO:0006952(InterPro)	-
Apidae	Bombus vancouverensis	Def1	LOC117166690	11885f6de0c3085c34a42733af5dceae	96	Gene3D	G3DSA:3.30.30.10	-	45	85	4.1E-15	TRUE	2025-06-26	IPR036574	Knottin, scorpion toxin-like superfamily	-	-
Apidae	Bombus vancouverensis	Def1	LOC117166690	11885f6de0c3085c34a42733af5dceae	96	ProSiteProfiles	PS51378	Invertebrate defensins family profile.	44	84	10.4852	TRUE	2025-06-26	IPR001542	Defensin, invertebrate/fungal	GO:0006952(InterPro)	-
Apidae	Bombus vancouverensis	Def1	LOC117166690	11885f6de0c3085c34a42733af5dceae	96	PRINTS	PR00271	Defensin signature	56	65	7.2E-5	TRUE	2025-06-26	IPR017982	Defensin, insect	-	-
Apidae	Bombus vancouverensis	Def1	LOC117166690	11885f6de0c3085c34a42733af5dceae	96	PRINTS	PR00271	Defensin signature	65	73	7.2E-5	TRUE	2025-06-26	IPR017982	Defensin, insect	-	-
Apidae	Bombus vancouverensis	Def1	LOC117166690	11885f6de0c3085c34a42733af5dceae	96	PRINTS	PR00271	Defensin signature	73	82	7.2E-5	TRUE	2025-06-26	IPR017982	Defensin, insect	-	-
Apidae	Bombus vancouverensis	Def1	LOC117166690	11885f6de0c3085c34a42733af5dceae	96	SUPERFAMILY	SSF57095	Scorpion toxin-like	45	84	2.12E-9	TRUE	2025-06-26	IPR036574	Knottin, scorpion toxin-like superfamily	-	-
Apidae	Bombus vestalis	Def1	ENSQDAG00000004704	27a53dcb965fdc64e742da1128e878ad	159	ProSiteProfiles	PS51378	Invertebrate defensins family profile.	107	147	10.367	TRUE	2025-06-26	IPR001542	Defensin, invertebrate/fungal	GO:0006952(InterPro)	-
Apidae	Bombus vestalis	Def1	ENSQDAG00000004704	27a53dcb965fdc64e742da1128e878ad	159	SUPERFAMILY	SSF57095	Scorpion toxin-like	108	147	8.96E-9	TRUE	2025-06-26	IPR036574	Knottin, scorpion toxin-like superfamily	-	-
Apidae	Bombus vestalis	Def1	ENSQDAG00000004704	27a53dcb965fdc64e742da1128e878ad	159	Gene3D	G3DSA:3.30.30.10	-	108	148	1.8E-14	TRUE	2025-06-26	IPR036574	Knottin, scorpion toxin-like superfamily	-	-
Apidae	Bombus vestalis	Def1	ENSQDAG00000004704	27a53dcb965fdc64e742da1128e878ad	159	Pfam	PF01097	Arthropod defensin	118	146	1.8E-5	TRUE	2025-06-26	IPR001542	Defensin, invertebrate/fungal	GO:0006952(InterPro)	-
Apidae	Bombus vosnesenskii	Def1	ENSBVOG00000018602	acc19ba61f9f98a53c479d4b77ce821d	157	ProSiteProfiles	PS51378	Invertebrate defensins family profile.	105	145	10.4852	TRUE	2025-06-26	IPR001542	Defensin, invertebrate/fungal	GO:0006952(InterPro)	-
Apidae	Bombus vosnesenskii	Def1	ENSBVOG00000018602	acc19ba61f9f98a53c479d4b77ce821d	157	Pfam	PF01097	Arthropod defensin	116	144	7.8E-6	TRUE	2025-06-26	IPR001542	Defensin, invertebrate/fungal	GO:0006952(InterPro)	-
Apidae	Bombus vosnesenskii	Def1	ENSBVOG00000018602	acc19ba61f9f98a53c479d4b77ce821d	157	SUPERFAMILY	SSF57095	Scorpion toxin-like	106	145	5.87E-9	TRUE	2025-06-26	IPR036574	Knottin, scorpion toxin-like superfamily	-	-
Apidae	Bombus vosnesenskii	Def1	ENSBVOG00000018602	acc19ba61f9f98a53c479d4b77ce821d	157	Gene3D	G3DSA:3.30.30.10	-	106	146	1.1E-14	TRUE	2025-06-26	IPR036574	Knottin, scorpion toxin-like superfamily	-	-
Apidae	Bombus waltoni	Def1	ENSBWAG00000005837	8f25e31e660f2bb9313e12e9ae5f51d2	160	Pfam	PF01097	Arthropod defensin	121	147	2.1E-5	TRUE	2025-06-26	IPR001542	Defensin, invertebrate/fungal	GO:0006952(InterPro)	-
Apidae	Bombus waltoni	Def1	ENSBWAG00000005837	8f25e31e660f2bb9313e12e9ae5f51d2	160	Gene3D	G3DSA:3.30.30.10	-	109	149	2.1E-14	TRUE	2025-06-26	IPR036574	Knottin, scorpion toxin-like superfamily	-	-
Apidae	Bombus waltoni	Def1	ENSBWAG00000005837	8f25e31e660f2bb9313e12e9ae5f51d2	160	ProSiteProfiles	PS51378	Invertebrate defensins family profile.	108	148	10.367	TRUE	2025-06-26	IPR001542	Defensin, invertebrate/fungal	GO:0006952(InterPro)	-
Apidae	Bombus waltoni	Def1	ENSBWAG00000005837	8f25e31e660f2bb9313e12e9ae5f51d2	160	SUPERFAMILY	SSF57095	Scorpion toxin-like	109	148	1.07E-8	TRUE	2025-06-26	IPR036574	Knottin, scorpion toxin-like superfamily	-	-
Apidae	Eufriesea mexicana	Def1	LOC108549430	27335dc7dc7c9082c582a74e5dfd7607	98	Pfam	PF01097	Arthropod defensin	57	85	3.4E-6	TRUE	2025-06-26	IPR001542	Defensin, invertebrate/fungal	GO:0006952(InterPro)	-
Apidae	Eufriesea mexicana	Def1	LOC108549430	27335dc7dc7c9082c582a74e5dfd7607	98	PRINTS	PR00271	Defensin signature	58	67	7.4E-5	TRUE	2025-06-26	IPR017982	Defensin, insect	-	-
Apidae	Eufriesea mexicana	Def1	LOC108549430	27335dc7dc7c9082c582a74e5dfd7607	98	PRINTS	PR00271	Defensin signature	67	75	7.4E-5	TRUE	2025-06-26	IPR017982	Defensin, insect	-	-
Apidae	Eufriesea mexicana	Def1	LOC108549430	27335dc7dc7c9082c582a74e5dfd7607	98	PRINTS	PR00271	Defensin signature	75	84	7.4E-5	TRUE	2025-06-26	IPR017982	Defensin, insect	-	-
Apidae	Eufriesea mexicana	Def1	LOC108549430	27335dc7dc7c9082c582a74e5dfd7607	98	ProSiteProfiles	PS51378	Invertebrate defensins family profile.	46	86	10.4852	TRUE	2025-06-26	IPR001542	Defensin, invertebrate/fungal	GO:0006952(InterPro)	-
Apidae	Eufriesea mexicana	Def1	LOC108549430	27335dc7dc7c9082c582a74e5dfd7607	98	Gene3D	G3DSA:3.30.30.10	-	47	87	4.3E-15	TRUE	2025-06-26	IPR036574	Knottin, scorpion toxin-like superfamily	-	-
Apidae	Eufriesea mexicana	Def1	LOC108549430	27335dc7dc7c9082c582a74e5dfd7607	98	SUPERFAMILY	SSF57095	Scorpion toxin-like	47	86	2.16E-9	TRUE	2025-06-26	IPR036574	Knottin, scorpion toxin-like superfamily	-	-
Apidae	Habropoda laboriosa	Def1	LOC108570380	76b03473abe705143dba24289dc9faac	96	ProSiteProfiles	PS51378	Invertebrate defensins family profile.	44	84	10.2128	TRUE	2025-06-26	IPR001542	Defensin, invertebrate/fungal	GO:0006952(InterPro)	-
Apidae	Habropoda laboriosa	Def1	LOC108570380	76b03473abe705143dba24289dc9faac	96	PRINTS	PR00271	Defensin signature	56	65	8.9E-5	TRUE	2025-06-26	IPR017982	Defensin, insect	-	-
Apidae	Habropoda laboriosa	Def1	LOC108570380	76b03473abe705143dba24289dc9faac	96	PRINTS	PR00271	Defensin signature	65	73	8.9E-5	TRUE	2025-06-26	IPR017982	Defensin, insect	-	-
Apidae	Habropoda laboriosa	Def1	LOC108570380	76b03473abe705143dba24289dc9faac	96	PRINTS	PR00271	Defensin signature	73	82	8.9E-5	TRUE	2025-06-26	IPR017982	Defensin, insect	-	-
Apidae	Habropoda laboriosa	Def1	LOC108570380	76b03473abe705143dba24289dc9faac	96	Gene3D	G3DSA:3.30.30.10	-	45	85	1.2E-14	TRUE	2025-06-26	IPR036574	Knottin, scorpion toxin-like superfamily	-	-
Apidae	Habropoda laboriosa	Def1	LOC108570380	76b03473abe705143dba24289dc9faac	96	SUPERFAMILY	SSF57095	Scorpion toxin-like	45	83	4.96E-9	TRUE	2025-06-26	IPR036574	Knottin, scorpion toxin-like superfamily	-	-
Apidae	Habropoda laboriosa	Def1	LOC108570380	76b03473abe705143dba24289dc9faac	96	Pfam	PF01097	Arthropod defensin	55	83	7.4E-6	TRUE	2025-06-26	IPR001542	Defensin, invertebrate/fungal	GO:0006952(InterPro)	-
Apidae	Nomada fabriciana	Def1	ENSNFBG00000002572	de1748c23ff9a7da94dbec1fa193ccbf	96	Pfam	PF01097	Arthropod defensin	56	83	2.4E-6	TRUE	2025-06-26	IPR001542	Defensin, invertebrate/fungal	GO:0006952(InterPro)	-
Apidae	Nomada fabriciana	Def1	ENSNFBG00000002572	de1748c23ff9a7da94dbec1fa193ccbf	96	SUPERFAMILY	SSF57095	Scorpion toxin-like	45	84	1.98E-9	TRUE	2025-06-26	IPR036574	Knottin, scorpion toxin-like superfamily	-	-
Apidae	Nomada fabriciana	Def1	ENSNFBG00000002572	de1748c23ff9a7da94dbec1fa193ccbf	96	ProSiteProfiles	PS51378	Invertebrate defensins family profile.	44	84	10.5417	TRUE	2025-06-26	IPR001542	Defensin, invertebrate/fungal	GO:0006952(InterPro)	-
Apidae	Nomada fabriciana	Def1	ENSNFBG00000002572	de1748c23ff9a7da94dbec1fa193ccbf	96	PRINTS	PR00271	Defensin signature	56	65	7.2E-5	TRUE	2025-06-26	IPR017982	Defensin, insect	-	-
Apidae	Nomada fabriciana	Def1	ENSNFBG00000002572	de1748c23ff9a7da94dbec1fa193ccbf	96	PRINTS	PR00271	Defensin signature	65	73	7.2E-5	TRUE	2025-06-26	IPR017982	Defensin, insect	-	-
Apidae	Nomada fabriciana	Def1	ENSNFBG00000002572	de1748c23ff9a7da94dbec1fa193ccbf	96	PRINTS	PR00271	Defensin signature	73	82	7.2E-5	TRUE	2025-06-26	IPR017982	Defensin, insect	-	-
Apidae	Nomada fabriciana	Def1	ENSNFBG00000002572	de1748c23ff9a7da94dbec1fa193ccbf	96	Gene3D	G3DSA:3.30.30.10	-	45	85	5.8E-15	TRUE	2025-06-26	IPR036574	Knottin, scorpion toxin-like superfamily	-	-
Apidae	Nomada ferruginata	Def1	ENSEXZG00000007578	0455e6a0f638a552117fc0a3e26bc7f0	154	Gene3D	G3DSA:3.30.30.10	-	103	143	1.7E-14	TRUE	2025-06-26	IPR036574	Knottin, scorpion toxin-like superfamily	-	-
Apidae	Nomada ferruginata	Def1	ENSEXZG00000007578	0455e6a0f638a552117fc0a3e26bc7f0	154	SUPERFAMILY	SSF57095	Scorpion toxin-like	103	142	7.91E-9	TRUE	2025-06-26	IPR036574	Knottin, scorpion toxin-like superfamily	-	-
Apidae	Nomada ferruginata	Def1	ENSEXZG00000007578	0455e6a0f638a552117fc0a3e26bc7f0	154	Pfam	PF01097	Arthropod defensin	115	141	8.6E-6	TRUE	2025-06-26	IPR001542	Defensin, invertebrate/fungal	GO:0006952(InterPro)	-
Apidae	Nomada ferruginata	Def1	ENSEXZG00000007578	0455e6a0f638a552117fc0a3e26bc7f0	154	ProSiteProfiles	PS51378	Invertebrate defensins family profile.	102	142	10.5417	TRUE	2025-06-26	IPR001542	Defensin, invertebrate/fungal	GO:0006952(InterPro)	-
Apidae	Nomada flava	Def1	ENSQOJG00000004550	387916ac7a6c56e9c877b994611bc4cb	154	ProSiteProfiles	PS51378	Invertebrate defensins family profile.	102	142	10.3772	TRUE	2025-06-26	IPR001542	Defensin, invertebrate/fungal	GO:0006952(InterPro)	-
Apidae	Nomada flava	Def1	ENSQOJG00000004550	387916ac7a6c56e9c877b994611bc4cb	154	Gene3D	G3DSA:3.30.30.10	-	103	143	2.1E-14	TRUE	2025-06-26	IPR036574	Knottin, scorpion toxin-like superfamily	-	-
Apidae	Nomada flava	Def1	ENSQOJG00000004550	387916ac7a6c56e9c877b994611bc4cb	154	SUPERFAMILY	SSF57095	Scorpion toxin-like	103	141	1.05E-8	TRUE	2025-06-26	IPR036574	Knottin, scorpion toxin-like superfamily	-	-
Apidae	Nomada flava	Def1	ENSQOJG00000004550	387916ac7a6c56e9c877b994611bc4cb	154	Pfam	PF01097	Arthropod defensin	115	141	8.6E-6	TRUE	2025-06-26	IPR001542	Defensin, invertebrate/fungal	GO:0006952(InterPro)	-
Apidae	Nomada fucata	Def1	ENSFANG00005002096	8e986767d47b53ead2335b394fbcb174	111	Pfam	PF01097	Arthropod defensin	78	104	4.8E-6	TRUE	2025-06-26	IPR001542	Defensin, invertebrate/fungal	GO:0006952(InterPro)	-
Apidae	Nomada fucata	Def1	ENSFANG00005002096	8e986767d47b53ead2335b394fbcb174	111	Gene3D	G3DSA:3.30.30.10	-	66	106	6.0E-15	TRUE	2025-06-26	IPR036574	Knottin, scorpion toxin-like superfamily	-	-
Apidae	Nomada fucata	Def1	ENSFANG00005002096	8e986767d47b53ead2335b394fbcb174	111	ProSiteProfiles	PS51378	Invertebrate defensins family profile.	65	105	10.5417	TRUE	2025-06-26	IPR001542	Defensin, invertebrate/fungal	GO:0006952(InterPro)	-
Apidae	Nomada fucata	Def1	ENSFANG00005002096	8e986767d47b53ead2335b394fbcb174	111	SUPERFAMILY	SSF57095	Scorpion toxin-like	66	105	3.38E-9	TRUE	2025-06-26	IPR036574	Knottin, scorpion toxin-like superfamily	-	-
Apidae	Nomada fucata	Def1	ENSFANG00005002096	8e986767d47b53ead2335b394fbcb174	111	PRINTS	PR00271	Defensin signature	77	86	9.3E-5	TRUE	2025-06-26	IPR017982	Defensin, insect	-	-
Apidae	Nomada fucata	Def1	ENSFANG00005002096	8e986767d47b53ead2335b394fbcb174	111	PRINTS	PR00271	Defensin signature	86	94	9.3E-5	TRUE	2025-06-26	IPR017982	Defensin, insect	-	-
Apidae	Nomada fucata	Def1	ENSFANG00005002096	8e986767d47b53ead2335b394fbcb174	111	PRINTS	PR00271	Defensin signature	94	103	9.3E-5	TRUE	2025-06-26	IPR017982	Defensin, insect	-	-
Apidae	Nomada hirtipes	Def1	ENSXLVG00000003363	6938c19bef2f4c51d31366651355308c	154	Pfam	PF01097	Arthropod defensin	115	141	8.6E-6	TRUE	2025-06-26	IPR001542	Defensin, invertebrate/fungal	GO:0006952(InterPro)	-
Apidae	Nomada hirtipes	Def1	ENSXLVG00000003363	6938c19bef2f4c51d31366651355308c	154	SUPERFAMILY	SSF57095	Scorpion toxin-like	103	142	7.91E-9	TRUE	2025-06-26	IPR036574	Knottin, scorpion toxin-like superfamily	-	-
Apidae	Nomada hirtipes	Def1	ENSXLVG00000003363	6938c19bef2f4c51d31366651355308c	154	Gene3D	G3DSA:3.30.30.10	-	103	143	1.7E-14	TRUE	2025-06-26	IPR036574	Knottin, scorpion toxin-like superfamily	-	-
Apidae	Nomada hirtipes	Def1	ENSXLVG00000003363	6938c19bef2f4c51d31366651355308c	154	ProSiteProfiles	PS51378	Invertebrate defensins family profile.	102	142	10.5417	TRUE	2025-06-26	IPR001542	Defensin, invertebrate/fungal	GO:0006952(InterPro)	-
Apidae	Nomada panzeri	Def1	ENSFLUG00000009249	a61ab516bd68b65902221927d6b8d231	154	ProSiteProfiles	PS51378	Invertebrate defensins family profile.	102	142	10.3772	TRUE	2025-06-26	IPR001542	Defensin, invertebrate/fungal	GO:0006952(InterPro)	-
Apidae	Nomada panzeri	Def1	ENSFLUG00000009249	a61ab516bd68b65902221927d6b8d231	154	Pfam	PF01097	Arthropod defensin	115	141	1.7E-5	TRUE	2025-06-26	IPR001542	Defensin, invertebrate/fungal	GO:0006952(InterPro)	-
Apidae	Nomada panzeri	Def1	ENSFLUG00000009249	a61ab516bd68b65902221927d6b8d231	154	SUPERFAMILY	SSF57095	Scorpion toxin-like	103	141	1.39E-8	TRUE	2025-06-26	IPR036574	Knottin, scorpion toxin-like superfamily	-	-
Apidae	Nomada panzeri	Def1	ENSFLUG00000009249	a61ab516bd68b65902221927d6b8d231	154	Gene3D	G3DSA:3.30.30.10	-	103	143	2.7E-14	TRUE	2025-06-26	IPR036574	Knottin, scorpion toxin-like superfamily	-	-
Apidae	Nomada ruficornis	Def1	ENSYGNG00000001265	4fcc1f66493cf19b87e280df7c9a839c	154	PRINTS	PR00271	Defensin signature	131	140	8.0E-5	TRUE	2025-06-26	IPR017982	Defensin, insect	-	-
Apidae	Nomada ruficornis	Def1	ENSYGNG00000001265	4fcc1f66493cf19b87e280df7c9a839c	154	PRINTS	PR00271	Defensin signature	123	131	8.0E-5	TRUE	2025-06-26	IPR017982	Defensin, insect	-	-
Apidae	Nomada ruficornis	Def1	ENSYGNG00000001265	4fcc1f66493cf19b87e280df7c9a839c	154	PRINTS	PR00271	Defensin signature	114	123	8.0E-5	TRUE	2025-06-26	IPR017982	Defensin, insect	-	-
Apidae	Nomada ruficornis	Def1	ENSYGNG00000001265	4fcc1f66493cf19b87e280df7c9a839c	154	SUPERFAMILY	SSF57095	Scorpion toxin-like	103	142	4.23E-9	TRUE	2025-06-26	IPR036574	Knottin, scorpion toxin-like superfamily	-	-
Apidae	Nomada ruficornis	Def1	ENSYGNG00000001265	4fcc1f66493cf19b87e280df7c9a839c	154	Gene3D	G3DSA:3.30.30.10	-	103	143	7.8E-15	TRUE	2025-06-26	IPR036574	Knottin, scorpion toxin-like superfamily	-	-
Apidae	Nomada ruficornis	Def1	ENSYGNG00000001265	4fcc1f66493cf19b87e280df7c9a839c	154	Pfam	PF01097	Arthropod defensin	114	141	9.0E-6	TRUE	2025-06-26	IPR001542	Defensin, invertebrate/fungal	GO:0006952(InterPro)	-
Apidae	Nomada ruficornis	Def1	ENSYGNG00000001265	4fcc1f66493cf19b87e280df7c9a839c	154	ProSiteProfiles	PS51378	Invertebrate defensins family profile.	102	142	10.5417	TRUE	2025-06-26	IPR001542	Defensin, invertebrate/fungal	GO:0006952(InterPro)	-
Colletidae	Colletes gigas	Def1	ENSCGGG00000008905	b0913f0ba351d48ac183e21370eb0064	139	ProSiteProfiles	PS51378	Invertebrate defensins family profile.	67	107	10.2179	TRUE	2025-06-26	IPR001542	Defensin, invertebrate/fungal	GO:0006952(InterPro)	-
Colletidae	Colletes gigas	Def1	ENSCGGG00000008905	b0913f0ba351d48ac183e21370eb0064	139	Gene3D	G3DSA:3.30.30.10	-	68	108	9.3E-15	TRUE	2025-06-26	IPR036574	Knottin, scorpion toxin-like superfamily	-	-
Colletidae	Colletes gigas	Def1	ENSCGGG00000008905	b0913f0ba351d48ac183e21370eb0064	139	Pfam	PF01097	Arthropod defensin	78	106	1.1E-5	TRUE	2025-06-26	IPR001542	Defensin, invertebrate/fungal	GO:0006952(InterPro)	-
Colletidae	Colletes gigas	Def1	ENSCGGG00000008905	b0913f0ba351d48ac183e21370eb0064	139	SUPERFAMILY	SSF57095	Scorpion toxin-like	68	107	5.49E-9	TRUE	2025-06-26	IPR036574	Knottin, scorpion toxin-like superfamily	-	-
Colletidae	Colletes gigas	Def1	ENSCGGG00000009065	bc5e25cded4e452560cb90db37364b6d	80	ProSiteProfiles	PS51378	Invertebrate defensins family profile.	47	80	9.97632	TRUE	2025-06-26	IPR001542	Defensin, invertebrate/fungal	GO:0006952(InterPro)	-
Colletidae	Colletes gigas	Def1	ENSCGGG00000009065	bc5e25cded4e452560cb90db37364b6d	80	Pfam	PF01097	Arthropod defensin	47	79	6.2E-5	TRUE	2025-06-26	IPR001542	Defensin, invertebrate/fungal	GO:0006952(InterPro)	-
Colletidae	Colletes gigas	Def1	ENSCGGG00000009065	bc5e25cded4e452560cb90db37364b6d	80	Gene3D	G3DSA:3.30.30.10	-	42	80	4.6E-6	TRUE	2025-06-26	IPR036574	Knottin, scorpion toxin-like superfamily	-	-
Crabronidae	Ectemnius cavifrons	Def1	ENSTSJG00000002219	2af0c79f31b3a790248227c02b26d8cb	106	ProSiteProfiles	PS51378	Invertebrate defensins family profile.	66	106	10.367	TRUE	2025-06-26	IPR001542	Defensin, invertebrate/fungal	GO:0006952(InterPro)	-
Crabronidae	Ectemnius cavifrons	Def1	ENSTSJG00000002219	2af0c79f31b3a790248227c02b26d8cb	106	Pfam	PF01097	Arthropod defensin	79	105	1.8E-5	TRUE	2025-06-26	IPR001542	Defensin, invertebrate/fungal	GO:0006952(InterPro)	-
Crabronidae	Ectemnius cavifrons	Def1	ENSTSJG00000002219	2af0c79f31b3a790248227c02b26d8cb	106	SUPERFAMILY	SSF57095	Scorpion toxin-like	67	106	3.59E-9	TRUE	2025-06-26	IPR036574	Knottin, scorpion toxin-like superfamily	-	-
Crabronidae	Ectemnius cavifrons	Def1	ENSTSJG00000002219	2af0c79f31b3a790248227c02b26d8cb	106	Gene3D	G3DSA:3.30.30.10	-	67	106	1.1E-14	TRUE	2025-06-26	IPR036574	Knottin, scorpion toxin-like superfamily	-	-
Crabronidae	Ectemnius continuus	Def1	ENSECTG00005004027	cce23766a2a3b78f865779c2892251ea	95	SUPERFAMILY	SSF57095	Scorpion toxin-like	44	83	2.87E-9	TRUE	2025-06-26	IPR036574	Knottin, scorpion toxin-like superfamily	-	-
Crabronidae	Ectemnius continuus	Def1	ENSECTG00005004027	cce23766a2a3b78f865779c2892251ea	95	Pfam	PF01097	Arthropod defensin	56	82	5.9E-6	TRUE	2025-06-26	IPR001542	Defensin, invertebrate/fungal	GO:0006952(InterPro)	-
Crabronidae	Ectemnius continuus	Def1	ENSECTG00005004027	cce23766a2a3b78f865779c2892251ea	95	PRINTS	PR00271	Defensin signature	55	64	8.7E-5	TRUE	2025-06-26	IPR017982	Defensin, insect	-	-
Crabronidae	Ectemnius continuus	Def1	ENSECTG00005004027	cce23766a2a3b78f865779c2892251ea	95	PRINTS	PR00271	Defensin signature	64	72	8.7E-5	TRUE	2025-06-26	IPR017982	Defensin, insect	-	-
Crabronidae	Ectemnius continuus	Def1	ENSECTG00005004027	cce23766a2a3b78f865779c2892251ea	95	PRINTS	PR00271	Defensin signature	72	81	8.7E-5	TRUE	2025-06-26	IPR017982	Defensin, insect	-	-
Crabronidae	Ectemnius continuus	Def1	ENSECTG00005004027	cce23766a2a3b78f865779c2892251ea	95	Gene3D	G3DSA:3.30.30.10	-	44	84	7.4E-15	TRUE	2025-06-26	IPR036574	Knottin, scorpion toxin-like superfamily	-	-
Crabronidae	Ectemnius continuus	Def1	ENSECTG00005004027	cce23766a2a3b78f865779c2892251ea	95	ProSiteProfiles	PS51378	Invertebrate defensins family profile.	43	83	10.367	TRUE	2025-06-26	IPR001542	Defensin, invertebrate/fungal	GO:0006952(InterPro)	-
Crabronidae	Ectemnius lituratus	Def1	ENSELIG00005000172	2f899e28f4eef1272732bcc76ea7abd3	95	Gene3D	G3DSA:3.30.30.10	-	44	84	4.8E-15	TRUE	2025-06-26	IPR036574	Knottin, scorpion toxin-like superfamily	-	-
Crabronidae	Ectemnius lituratus	Def1	ENSELIG00005000172	2f899e28f4eef1272732bcc76ea7abd3	95	ProSiteProfiles	PS51378	Invertebrate defensins family profile.	43	83	10.2179	TRUE	2025-06-26	IPR001542	Defensin, invertebrate/fungal	GO:0006952(InterPro)	-
Crabronidae	Ectemnius lituratus	Def1	ENSELIG00005000172	2f899e28f4eef1272732bcc76ea7abd3	95	SUPERFAMILY	SSF57095	Scorpion toxin-like	44	82	9.71E-9	TRUE	2025-06-26	IPR036574	Knottin, scorpion toxin-like superfamily	-	-
Crabronidae	Ectemnius lituratus	Def1	ENSELIG00005000172	2f899e28f4eef1272732bcc76ea7abd3	95	Pfam	PF01097	Arthropod defensin	56	82	3.7E-6	TRUE	2025-06-26	IPR001542	Defensin, invertebrate/fungal	GO:0006952(InterPro)	-
Crabronidae	Mimumesa dahlbomi	Def1	BRAKERMDHG00005012598	eee06371e1162937c72acc2a30b67acb	92	SUPERFAMILY	SSF57095	Scorpion toxin-like	41	80	1.82E-9	TRUE	2025-06-26	IPR036574	Knottin, scorpion toxin-like superfamily	-	-
Crabronidae	Mimumesa dahlbomi	Def1	BRAKERMDHG00005012598	eee06371e1162937c72acc2a30b67acb	92	ProSiteProfiles	PS51378	Invertebrate defensins family profile.	40	80	10.4852	TRUE	2025-06-26	IPR001542	Defensin, invertebrate/fungal	GO:0006952(InterPro)	-
Crabronidae	Mimumesa dahlbomi	Def1	BRAKERMDHG00005012598	eee06371e1162937c72acc2a30b67acb	92	PRINTS	PR00271	Defensin signature	61	69	6.7E-5	TRUE	2025-06-26	IPR017982	Defensin, insect	-	-
Crabronidae	Mimumesa dahlbomi	Def1	BRAKERMDHG00005012598	eee06371e1162937c72acc2a30b67acb	92	PRINTS	PR00271	Defensin signature	69	78	6.7E-5	TRUE	2025-06-26	IPR017982	Defensin, insect	-	-
Crabronidae	Mimumesa dahlbomi	Def1	BRAKERMDHG00005012598	eee06371e1162937c72acc2a30b67acb	92	PRINTS	PR00271	Defensin signature	52	61	6.7E-5	TRUE	2025-06-26	IPR017982	Defensin, insect	-	-
Crabronidae	Mimumesa dahlbomi	Def1	BRAKERMDHG00005012598	eee06371e1162937c72acc2a30b67acb	92	Pfam	PF01097	Arthropod defensin	51	79	3.0E-6	TRUE	2025-06-26	IPR001542	Defensin, invertebrate/fungal	GO:0006952(InterPro)	-
Crabronidae	Mimumesa dahlbomi	Def1	BRAKERMDHG00005012598	eee06371e1162937c72acc2a30b67acb	92	Gene3D	G3DSA:3.30.30.10	-	41	81	3.7E-15	TRUE	2025-06-26	IPR036574	Knottin, scorpion toxin-like superfamily	-	-
Crabronidae	Nysson spinosus	Def1	ENSNSPG00005001705	81db2bf73993a4e88f3c67174db13133	92	ProSiteProfiles	PS51378	Invertebrate defensins family profile.	40	80	10.0534	TRUE	2025-06-26	IPR001542	Defensin, invertebrate/fungal	GO:0006952(InterPro)	-
Crabronidae	Nysson spinosus	Def1	ENSNSPG00005001705	81db2bf73993a4e88f3c67174db13133	92	Pfam	PF01097	Arthropod defensin	53	79	3.0E-5	TRUE	2025-06-26	IPR001542	Defensin, invertebrate/fungal	GO:0006952(InterPro)	-
Crabronidae	Nysson spinosus	Def1	ENSNSPG00005001705	81db2bf73993a4e88f3c67174db13133	92	Gene3D	G3DSA:3.30.30.10	-	41	81	1.3E-14	TRUE	2025-06-26	IPR036574	Knottin, scorpion toxin-like superfamily	-	-
Crabronidae	Nysson spinosus	Def1	ENSNSPG00005001705	81db2bf73993a4e88f3c67174db13133	92	SUPERFAMILY	SSF57095	Scorpion toxin-like	41	80	8.43E-9	TRUE	2025-06-26	IPR036574	Knottin, scorpion toxin-like superfamily	-	-
Drosophilidae	Drosophila melanogaster	Def1	FBgn0010385	c22e89fdfdc145f3bbf1f2f316bcb9b8	92	Pfam	PF01097	Arthropod defensin	62	91	2.6E-12	TRUE	2025-06-26	IPR001542	Defensin, invertebrate/fungal	GO:0006952(InterPro)	-
Drosophilidae	Drosophila melanogaster	Def1	FBgn0010385	c22e89fdfdc145f3bbf1f2f316bcb9b8	92	Gene3D	G3DSA:3.30.30.10	-	53	92	3.4E-20	TRUE	2025-06-26	IPR036574	Knottin, scorpion toxin-like superfamily	-	-
Drosophilidae	Drosophila melanogaster	Def1	FBgn0010385	c22e89fdfdc145f3bbf1f2f316bcb9b8	92	ProSiteProfiles	PS51378	Invertebrate defensins family profile.	52	92	12.4743	TRUE	2025-06-26	IPR001542	Defensin, invertebrate/fungal	GO:0006952(InterPro)	-
Drosophilidae	Drosophila melanogaster	Def1	FBgn0010385	c22e89fdfdc145f3bbf1f2f316bcb9b8	92	SUPERFAMILY	SSF57095	Scorpion toxin-like	53	92	1.69E-13	TRUE	2025-06-26	IPR036574	Knottin, scorpion toxin-like superfamily	-	-
Formicidae	Solenopsis invicta	Def1	LOC105196210	ab277c5968f1243e1d5c968d63dfb01b	108	Gene3D	G3DSA:3.30.30.10	-	54	92	7.1E-14	TRUE	2025-06-26	IPR036574	Knottin, scorpion toxin-like superfamily	-	-
Formicidae	Solenopsis invicta	Def1	LOC105196210	ab277c5968f1243e1d5c968d63dfb01b	108	SUPERFAMILY	SSF57095	Scorpion toxin-like	54	91	1.4E-10	TRUE	2025-06-26	IPR036574	Knottin, scorpion toxin-like superfamily	-	-
Formicidae	Solenopsis invicta	Def1	LOC105196210	ab277c5968f1243e1d5c968d63dfb01b	108	ProSiteProfiles	PS51378	Invertebrate defensins family profile.	52	92	10.2693	TRUE	2025-06-26	IPR001542	Defensin, invertebrate/fungal	GO:0006952(InterPro)	-
Formicidae	Solenopsis invicta	Def1	LOC105196210	ab277c5968f1243e1d5c968d63dfb01b	108	Pfam	PF01097	Arthropod defensin	60	91	8.5E-5	TRUE	2025-06-26	IPR001542	Defensin, invertebrate/fungal	GO:0006952(InterPro)	-
Formicidae	Solenopsis invicta	Def1	LOC113003652	2687e71f8ac2e034cc1b78bf7d008228	96	Pfam	PF01097	Arthropod defensin	59	90	1.5E-9	TRUE	2025-06-26	IPR001542	Defensin, invertebrate/fungal	GO:0006952(InterPro)	-
Formicidae	Solenopsis invicta	Def1	LOC113003652	2687e71f8ac2e034cc1b78bf7d008228	96	Gene3D	G3DSA:3.30.30.10	-	52	91	1.4E-17	TRUE	2025-06-26	IPR036574	Knottin, scorpion toxin-like superfamily	-	-
Formicidae	Solenopsis invicta	Def1	LOC113003652	2687e71f8ac2e034cc1b78bf7d008228	96	ProSiteProfiles	PS51378	Invertebrate defensins family profile.	51	91	11.472	TRUE	2025-06-26	IPR001542	Defensin, invertebrate/fungal	GO:0006952(InterPro)	-
Formicidae	Solenopsis invicta	Def1	LOC113003652	2687e71f8ac2e034cc1b78bf7d008228	96	SUPERFAMILY	SSF57095	Scorpion toxin-like	52	91	1.06E-12	TRUE	2025-06-26	IPR036574	Knottin, scorpion toxin-like superfamily	-	-
Halictidae	Dufourea novaeangliae	Def1	LOC107187609	376b6a0bc335c33763244814362022d0	87	Pfam	PF01097	Arthropod defensin	49	79	1.9E-8	TRUE	2025-06-26	IPR001542	Defensin, invertebrate/fungal	GO:0006952(InterPro)	-
Halictidae	Dufourea novaeangliae	Def1	LOC107187609	376b6a0bc335c33763244814362022d0	87	Gene3D	G3DSA:3.30.30.10	-	41	81	3.3E-17	TRUE	2025-06-26	IPR036574	Knottin, scorpion toxin-like superfamily	-	-
Halictidae	Dufourea novaeangliae	Def1	LOC107187609	376b6a0bc335c33763244814362022d0	87	ProSiteProfiles	PS51378	Invertebrate defensins family profile.	40	80	11.2459	TRUE	2025-06-26	IPR001542	Defensin, invertebrate/fungal	GO:0006952(InterPro)	-
Halictidae	Dufourea novaeangliae	Def1	LOC107187609	376b6a0bc335c33763244814362022d0	87	PRINTS	PR00271	Defensin signature	52	61	3.3E-6	TRUE	2025-06-26	IPR017982	Defensin, insect	-	-
Halictidae	Dufourea novaeangliae	Def1	LOC107187609	376b6a0bc335c33763244814362022d0	87	PRINTS	PR00271	Defensin signature	61	69	3.3E-6	TRUE	2025-06-26	IPR017982	Defensin, insect	-	-
Halictidae	Dufourea novaeangliae	Def1	LOC107187609	376b6a0bc335c33763244814362022d0	87	PRINTS	PR00271	Defensin signature	69	78	3.3E-6	TRUE	2025-06-26	IPR017982	Defensin, insect	-	-
Halictidae	Dufourea novaeangliae	Def1	LOC107187609	376b6a0bc335c33763244814362022d0	87	SMART	SM00505	gth 4	42	82	3.5E-5	TRUE	2025-06-26	IPR003614	Knottin, scorpion toxin-like	GO:0006952(InterPro)	-
Halictidae	Dufourea novaeangliae	Def1	LOC107187609	376b6a0bc335c33763244814362022d0	87	SUPERFAMILY	SSF57095	Scorpion toxin-like	41	80	1.41E-10	TRUE	2025-06-26	IPR036574	Knottin, scorpion toxin-like superfamily	-	-
Halictidae	Dufourea novaeangliae	Def1	LOC107187610	1ab519aa7cbbace886873e9e94c54d25	92	SUPERFAMILY	SSF57095	Scorpion toxin-like	41	80	5.82E-9	TRUE	2025-06-26	IPR036574	Knottin, scorpion toxin-like superfamily	-	-
Halictidae	Dufourea novaeangliae	Def1	LOC107187610	1ab519aa7cbbace886873e9e94c54d25	92	ProSiteProfiles	PS51378	Invertebrate defensins family profile.	40	80	10.5109	TRUE	2025-06-26	IPR001542	Defensin, invertebrate/fungal	GO:0006952(InterPro)	-
Halictidae	Dufourea novaeangliae	Def1	LOC107187610	1ab519aa7cbbace886873e9e94c54d25	92	PRINTS	PR00271	Defensin signature	52	61	4.2E-5	TRUE	2025-06-26	IPR017982	Defensin, insect	-	-
Halictidae	Dufourea novaeangliae	Def1	LOC107187610	1ab519aa7cbbace886873e9e94c54d25	92	PRINTS	PR00271	Defensin signature	61	69	4.2E-5	TRUE	2025-06-26	IPR017982	Defensin, insect	-	-
Halictidae	Dufourea novaeangliae	Def1	LOC107187610	1ab519aa7cbbace886873e9e94c54d25	92	PRINTS	PR00271	Defensin signature	69	78	4.2E-5	TRUE	2025-06-26	IPR017982	Defensin, insect	-	-
Halictidae	Dufourea novaeangliae	Def1	LOC107187610	1ab519aa7cbbace886873e9e94c54d25	92	Pfam	PF01097	Arthropod defensin	49	79	3.1E-6	TRUE	2025-06-26	IPR001542	Defensin, invertebrate/fungal	GO:0006952(InterPro)	-
Halictidae	Dufourea novaeangliae	Def1	LOC107187610	1ab519aa7cbbace886873e9e94c54d25	92	SMART	SM00505	gth 4	42	82	4.0E-4	TRUE	2025-06-26	IPR003614	Knottin, scorpion toxin-like	GO:0006952(InterPro)	-
Halictidae	Dufourea novaeangliae	Def1	LOC107187610	1ab519aa7cbbace886873e9e94c54d25	92	Gene3D	G3DSA:3.30.30.10	-	41	82	3.8E-15	TRUE	2025-06-26	IPR036574	Knottin, scorpion toxin-like superfamily	-	-
Halictidae	Lasioglossum lativentre	Def1	ENSLLVG00000013186	3060a2c5e451fa216afce5495eecaf92	97	Pfam	PF01097	Arthropod defensin	56	84	3.3E-6	TRUE	2025-06-26	IPR001542	Defensin, invertebrate/fungal	GO:0006952(InterPro)	-
Halictidae	Lasioglossum lativentre	Def1	ENSLLVG00000013186	3060a2c5e451fa216afce5495eecaf92	97	PRINTS	PR00271	Defensin signature	57	66	7.3E-5	TRUE	2025-06-26	IPR017982	Defensin, insect	-	-
Halictidae	Lasioglossum lativentre	Def1	ENSLLVG00000013186	3060a2c5e451fa216afce5495eecaf92	97	PRINTS	PR00271	Defensin signature	66	74	7.3E-5	TRUE	2025-06-26	IPR017982	Defensin, insect	-	-
Halictidae	Lasioglossum lativentre	Def1	ENSLLVG00000013186	3060a2c5e451fa216afce5495eecaf92	97	PRINTS	PR00271	Defensin signature	74	83	7.3E-5	TRUE	2025-06-26	IPR017982	Defensin, insect	-	-
Halictidae	Lasioglossum lativentre	Def1	ENSLLVG00000013186	3060a2c5e451fa216afce5495eecaf92	97	Gene3D	G3DSA:3.30.30.10	-	46	86	7.4E-15	TRUE	2025-06-26	IPR036574	Knottin, scorpion toxin-like superfamily	-	-
Halictidae	Lasioglossum lativentre	Def1	ENSLLVG00000013186	3060a2c5e451fa216afce5495eecaf92	97	ProSiteProfiles	PS51378	Invertebrate defensins family profile.	45	85	10.331	TRUE	2025-06-26	IPR001542	Defensin, invertebrate/fungal	GO:0006952(InterPro)	-
Halictidae	Lasioglossum lativentre	Def1	ENSLLVG00000013186	3060a2c5e451fa216afce5495eecaf92	97	SUPERFAMILY	SSF57095	Scorpion toxin-like	46	84	3.64E-9	TRUE	2025-06-26	IPR036574	Knottin, scorpion toxin-like superfamily	-	-
Halictidae	Lasioglossum lativentre	Def1	ENSLLVG00000013554	668ce583d9fba7aca3d8fa05597a5991	97	Gene3D	G3DSA:3.30.30.10	-	46	86	4.2E-15	TRUE	2025-06-26	IPR036574	Knottin, scorpion toxin-like superfamily	-	-
Halictidae	Lasioglossum lativentre	Def1	ENSLLVG00000013554	668ce583d9fba7aca3d8fa05597a5991	97	SUPERFAMILY	SSF57095	Scorpion toxin-like	46	85	2.11E-9	TRUE	2025-06-26	IPR036574	Knottin, scorpion toxin-like superfamily	-	-
Halictidae	Lasioglossum lativentre	Def1	ENSLLVG00000013554	668ce583d9fba7aca3d8fa05597a5991	97	PRINTS	PR00271	Defensin signature	57	66	7.3E-5	TRUE	2025-06-26	IPR017982	Defensin, insect	-	-
Halictidae	Lasioglossum lativentre	Def1	ENSLLVG00000013554	668ce583d9fba7aca3d8fa05597a5991	97	PRINTS	PR00271	Defensin signature	66	74	7.3E-5	TRUE	2025-06-26	IPR017982	Defensin, insect	-	-
Halictidae	Lasioglossum lativentre	Def1	ENSLLVG00000013554	668ce583d9fba7aca3d8fa05597a5991	97	PRINTS	PR00271	Defensin signature	74	83	7.3E-5	TRUE	2025-06-26	IPR017982	Defensin, insect	-	-
Halictidae	Lasioglossum lativentre	Def1	ENSLLVG00000013554	668ce583d9fba7aca3d8fa05597a5991	97	Pfam	PF01097	Arthropod defensin	56	84	3.3E-6	TRUE	2025-06-26	IPR001542	Defensin, invertebrate/fungal	GO:0006952(InterPro)	-
Halictidae	Lasioglossum lativentre	Def1	ENSLLVG00000013554	668ce583d9fba7aca3d8fa05597a5991	97	ProSiteProfiles	PS51378	Invertebrate defensins family profile.	45	85	10.4852	TRUE	2025-06-26	IPR001542	Defensin, invertebrate/fungal	GO:0006952(InterPro)	-
Halictidae	Lasioglossum morio	Def1	ENSLMRG00010006990	b2b31644118063876c9dc84d9c3ebfa7	103	ProSiteProfiles	PS51378	Invertebrate defensins family profile.	59	99	10.4852	TRUE	2025-06-26	IPR001542	Defensin, invertebrate/fungal	GO:0006952(InterPro)	-
Halictidae	Lasioglossum morio	Def1	ENSLMRG00010006990	b2b31644118063876c9dc84d9c3ebfa7	103	PRINTS	PR00271	Defensin signature	71	80	8.1E-5	TRUE	2025-06-26	IPR017982	Defensin, insect	-	-
Halictidae	Lasioglossum morio	Def1	ENSLMRG00010006990	b2b31644118063876c9dc84d9c3ebfa7	103	PRINTS	PR00271	Defensin signature	88	97	8.1E-5	TRUE	2025-06-26	IPR017982	Defensin, insect	-	-
Halictidae	Lasioglossum morio	Def1	ENSLMRG00010006990	b2b31644118063876c9dc84d9c3ebfa7	103	PRINTS	PR00271	Defensin signature	80	88	8.1E-5	TRUE	2025-06-26	IPR017982	Defensin, insect	-	-
Halictidae	Lasioglossum morio	Def1	ENSLMRG00010006990	b2b31644118063876c9dc84d9c3ebfa7	103	Gene3D	G3DSA:3.30.30.10	-	60	100	3.5E-15	TRUE	2025-06-26	IPR036574	Knottin, scorpion toxin-like superfamily	-	-
Halictidae	Lasioglossum morio	Def1	ENSLMRG00010006990	b2b31644118063876c9dc84d9c3ebfa7	103	Pfam	PF01097	Arthropod defensin	72	98	7.5E-6	TRUE	2025-06-26	IPR001542	Defensin, invertebrate/fungal	GO:0006952(InterPro)	-
Halictidae	Lasioglossum morio	Def1	ENSLMRG00010006990	b2b31644118063876c9dc84d9c3ebfa7	103	SUPERFAMILY	SSF57095	Scorpion toxin-like	60	99	3.95E-9	TRUE	2025-06-26	IPR036574	Knottin, scorpion toxin-like superfamily	-	-
Halictidae	Lasioglossum pauxillum	Def1	ENSLPUG00000015982	c7f3d050315fb27ff76e5cfb99dec43d	97	Gene3D	G3DSA:3.30.30.10	-	46	86	4.2E-15	TRUE	2025-06-26	IPR036574	Knottin, scorpion toxin-like superfamily	-	-
Halictidae	Lasioglossum pauxillum	Def1	ENSLPUG00000015982	c7f3d050315fb27ff76e5cfb99dec43d	97	SUPERFAMILY	SSF57095	Scorpion toxin-like	46	85	2.11E-9	TRUE	2025-06-26	IPR036574	Knottin, scorpion toxin-like superfamily	-	-
Halictidae	Lasioglossum pauxillum	Def1	ENSLPUG00000015982	c7f3d050315fb27ff76e5cfb99dec43d	97	PRINTS	PR00271	Defensin signature	57	66	7.3E-5	TRUE	2025-06-26	IPR017982	Defensin, insect	-	-
Halictidae	Lasioglossum pauxillum	Def1	ENSLPUG00000015982	c7f3d050315fb27ff76e5cfb99dec43d	97	PRINTS	PR00271	Defensin signature	66	74	7.3E-5	TRUE	2025-06-26	IPR017982	Defensin, insect	-	-
Halictidae	Lasioglossum pauxillum	Def1	ENSLPUG00000015982	c7f3d050315fb27ff76e5cfb99dec43d	97	PRINTS	PR00271	Defensin signature	74	83	7.3E-5	TRUE	2025-06-26	IPR017982	Defensin, insect	-	-
Halictidae	Lasioglossum pauxillum	Def1	ENSLPUG00000015982	c7f3d050315fb27ff76e5cfb99dec43d	97	Pfam	PF01097	Arthropod defensin	56	84	3.3E-6	TRUE	2025-06-26	IPR001542	Defensin, invertebrate/fungal	GO:0006952(InterPro)	-
Halictidae	Lasioglossum pauxillum	Def1	ENSLPUG00000015982	c7f3d050315fb27ff76e5cfb99dec43d	97	ProSiteProfiles	PS51378	Invertebrate defensins family profile.	45	85	10.4852	TRUE	2025-06-26	IPR001542	Defensin, invertebrate/fungal	GO:0006952(InterPro)	-
Halictidae	Seladonia tumulorum	Def1	BRAKERSTMG00015009287	6804e1d06287fe12bd5ed33f721f04e5	97	Pfam	PF01097	Arthropod defensin	58	84	2.6E-6	TRUE	2025-06-26	IPR001542	Defensin, invertebrate/fungal	GO:0006952(InterPro)	-
Halictidae	Seladonia tumulorum	Def1	BRAKERSTMG00015009287	6804e1d06287fe12bd5ed33f721f04e5	97	Gene3D	G3DSA:3.30.30.10	-	46	86	4.8E-15	TRUE	2025-06-26	IPR036574	Knottin, scorpion toxin-like superfamily	-	-
Halictidae	Seladonia tumulorum	Def1	BRAKERSTMG00015009287	6804e1d06287fe12bd5ed33f721f04e5	97	SUPERFAMILY	SSF57095	Scorpion toxin-like	46	85	2.37E-9	TRUE	2025-06-26	IPR036574	Knottin, scorpion toxin-like superfamily	-	-
Halictidae	Seladonia tumulorum	Def1	BRAKERSTMG00015009287	6804e1d06287fe12bd5ed33f721f04e5	97	PRINTS	PR00271	Defensin signature	57	66	7.3E-5	TRUE	2025-06-26	IPR017982	Defensin, insect	-	-
Halictidae	Seladonia tumulorum	Def1	BRAKERSTMG00015009287	6804e1d06287fe12bd5ed33f721f04e5	97	PRINTS	PR00271	Defensin signature	66	74	7.3E-5	TRUE	2025-06-26	IPR017982	Defensin, insect	-	-
Halictidae	Seladonia tumulorum	Def1	BRAKERSTMG00015009287	6804e1d06287fe12bd5ed33f721f04e5	97	PRINTS	PR00271	Defensin signature	74	83	7.3E-5	TRUE	2025-06-26	IPR017982	Defensin, insect	-	-
Halictidae	Seladonia tumulorum	Def1	BRAKERSTMG00015009287	6804e1d06287fe12bd5ed33f721f04e5	97	ProSiteProfiles	PS51378	Invertebrate defensins family profile.	45	85	10.4852	TRUE	2025-06-26	IPR001542	Defensin, invertebrate/fungal	GO:0006952(InterPro)	-
Halictidae	Sphecodes monilicornis	Def1	ENSSSOG00015003277	53b36136f43a409f0b4c1248c7307171	132	SUPERFAMILY	SSF57095	Scorpion toxin-like	59	97	6.79E-9	TRUE	2025-06-26	IPR036574	Knottin, scorpion toxin-like superfamily	-	-
Halictidae	Sphecodes monilicornis	Def1	ENSSSOG00015003277	53b36136f43a409f0b4c1248c7307171	132	ProSiteProfiles	PS51378	Invertebrate defensins family profile.	58	98	10.331	TRUE	2025-06-26	IPR001542	Defensin, invertebrate/fungal	GO:0006952(InterPro)	-
Halictidae	Sphecodes monilicornis	Def1	ENSSSOG00015003277	53b36136f43a409f0b4c1248c7307171	132	Pfam	PF01097	Arthropod defensin	71	97	4.0E-6	TRUE	2025-06-26	IPR001542	Defensin, invertebrate/fungal	GO:0006952(InterPro)	-
Halictidae	Sphecodes monilicornis	Def1	ENSSSOG00015003277	53b36136f43a409f0b4c1248c7307171	132	Gene3D	G3DSA:3.30.30.10	-	59	99	2.6E-14	TRUE	2025-06-26	IPR036574	Knottin, scorpion toxin-like superfamily	-	-
Megachilidae	Megachile leachella	Def1	ENSIQGG00000013583	a95bb2bc43fbc02f27658b43b23fb597	163	SMART	SM00505	gth 4	113	153	8.9E-4	TRUE	2025-06-26	IPR003614	Knottin, scorpion toxin-like	GO:0006952(InterPro)	-
Megachilidae	Megachile leachella	Def1	ENSIQGG00000013583	a95bb2bc43fbc02f27658b43b23fb597	163	Gene3D	G3DSA:3.30.30.10	-	112	152	2.1E-14	TRUE	2025-06-26	IPR036574	Knottin, scorpion toxin-like superfamily	-	-
Megachilidae	Megachile leachella	Def1	ENSIQGG00000013583	a95bb2bc43fbc02f27658b43b23fb597	163	Pfam	PF01097	Arthropod defensin	121	150	1.5E-5	TRUE	2025-06-26	IPR001542	Defensin, invertebrate/fungal	GO:0006952(InterPro)	-
Megachilidae	Megachile leachella	Def1	ENSIQGG00000013583	a95bb2bc43fbc02f27658b43b23fb597	163	SUPERFAMILY	SSF57095	Scorpion toxin-like	112	151	6.54E-9	TRUE	2025-06-26	IPR036574	Knottin, scorpion toxin-like superfamily	-	-
Megachilidae	Megachile leachella	Def1	ENSIQGG00000013583	a95bb2bc43fbc02f27658b43b23fb597	163	ProSiteProfiles	PS51378	Invertebrate defensins family profile.	111	151	10.2179	TRUE	2025-06-26	IPR001542	Defensin, invertebrate/fungal	GO:0006952(InterPro)	-
Megachilidae	Megachile ligniseca	Def1	ENSMLIG00010010770	2c1f8fa95fce59f2292c44774e77d94b	95	Pfam	PF01097	Arthropod defensin	55	82	5.9E-6	TRUE	2025-06-26	IPR001542	Defensin, invertebrate/fungal	GO:0006952(InterPro)	-
Megachilidae	Megachile ligniseca	Def1	ENSMLIG00010010770	2c1f8fa95fce59f2292c44774e77d94b	95	SUPERFAMILY	SSF57095	Scorpion toxin-like	44	83	3.46E-9	TRUE	2025-06-26	IPR036574	Knottin, scorpion toxin-like superfamily	-	-
Megachilidae	Megachile ligniseca	Def1	ENSMLIG00010010770	2c1f8fa95fce59f2292c44774e77d94b	95	Gene3D	G3DSA:3.30.30.10	-	44	84	7.7E-15	TRUE	2025-06-26	IPR036574	Knottin, scorpion toxin-like superfamily	-	-
Megachilidae	Megachile ligniseca	Def1	ENSMLIG00010010770	2c1f8fa95fce59f2292c44774e77d94b	95	ProSiteProfiles	PS51378	Invertebrate defensins family profile.	43	83	10.4595	TRUE	2025-06-26	IPR001542	Defensin, invertebrate/fungal	GO:0006952(InterPro)	-
Megachilidae	Megachile ligniseca	Def1	ENSMLIG00010010770	2c1f8fa95fce59f2292c44774e77d94b	95	PRINTS	PR00271	Defensin signature	55	64	6.3E-5	TRUE	2025-06-26	IPR017982	Defensin, insect	-	-
Megachilidae	Megachile ligniseca	Def1	ENSMLIG00010010770	2c1f8fa95fce59f2292c44774e77d94b	95	PRINTS	PR00271	Defensin signature	72	81	6.3E-5	TRUE	2025-06-26	IPR017982	Defensin, insect	-	-
Megachilidae	Megachile ligniseca	Def1	ENSMLIG00010010770	2c1f8fa95fce59f2292c44774e77d94b	95	PRINTS	PR00271	Defensin signature	64	72	6.3E-5	TRUE	2025-06-26	IPR017982	Defensin, insect	-	-
Megachilidae	Megachile ligniseca	Def1	ENSMLIG00010010770	2c1f8fa95fce59f2292c44774e77d94b	95	SMART	SM00505	gth 4	45	85	0.0045	TRUE	2025-06-26	IPR003614	Knottin, scorpion toxin-like	GO:0006952(InterPro)	-
Megachilidae	Megachile rotundata	Def1	LOC100881197	1793df1209d7e79cfd38dcb482349524	163	Pfam	PF01097	Arthropod defensin	121	150	7.0E-5	TRUE	2025-06-26	IPR001542	Defensin, invertebrate/fungal	GO:0006952(InterPro)	-
Megachilidae	Megachile rotundata	Def1	LOC100881197	1793df1209d7e79cfd38dcb482349524	163	SMART	SM00505	gth 4	113	153	5.9E-4	TRUE	2025-06-26	IPR003614	Knottin, scorpion toxin-like	GO:0006952(InterPro)	-
Megachilidae	Megachile rotundata	Def1	LOC100881197	1793df1209d7e79cfd38dcb482349524	163	SUPERFAMILY	SSF57095	Scorpion toxin-like	112	151	1.82E-8	TRUE	2025-06-26	IPR036574	Knottin, scorpion toxin-like superfamily	-	-
Megachilidae	Megachile rotundata	Def1	LOC100881197	1793df1209d7e79cfd38dcb482349524	163	ProSiteProfiles	PS51378	Invertebrate defensins family profile.	111	151	10.3053	TRUE	2025-06-26	IPR001542	Defensin, invertebrate/fungal	GO:0006952(InterPro)	-
Megachilidae	Megachile rotundata	Def1	LOC100881197	1793df1209d7e79cfd38dcb482349524	163	Gene3D	G3DSA:3.30.30.10	-	112	152	2.4E-14	TRUE	2025-06-26	IPR036574	Knottin, scorpion toxin-like superfamily	-	-
Megachilidae	Megachile willughbiella	Def1	ENSMWIG00010014074	549175b4b53cc31072910296996f6e8f	163	Gene3D	G3DSA:3.30.30.10	-	112	151	5.7E-14	TRUE	2025-06-26	IPR036574	Knottin, scorpion toxin-like superfamily	-	-
Megachilidae	Megachile willughbiella	Def1	ENSMWIG00010014074	549175b4b53cc31072910296996f6e8f	163	Pfam	PF01097	Arthropod defensin	121	150	7.3E-5	TRUE	2025-06-26	IPR001542	Defensin, invertebrate/fungal	GO:0006952(InterPro)	-
Megachilidae	Megachile willughbiella	Def1	ENSMWIG00010014074	549175b4b53cc31072910296996f6e8f	163	ProSiteProfiles	PS51378	Invertebrate defensins family profile.	111	151	9.99174	TRUE	2025-06-26	IPR001542	Defensin, invertebrate/fungal	GO:0006952(InterPro)	-
Megachilidae	Megachile willughbiella	Def1	ENSMWIG00010014074	549175b4b53cc31072910296996f6e8f	163	SUPERFAMILY	SSF57095	Scorpion toxin-like	112	150	6.36E-8	TRUE	2025-06-26	IPR036574	Knottin, scorpion toxin-like superfamily	-	-
Megachilidae	Osmia bicornis	Def1	ENSOBBG00005013070	ad66afc38d4abac7e5e4f3505a358077	102	PRINTS	PR00271	Defensin signature	62	71	5.3E-5	TRUE	2025-06-26	IPR017982	Defensin, insect	-	-
Megachilidae	Osmia bicornis	Def1	ENSOBBG00005013070	ad66afc38d4abac7e5e4f3505a358077	102	PRINTS	PR00271	Defensin signature	71	79	5.3E-5	TRUE	2025-06-26	IPR017982	Defensin, insect	-	-
Megachilidae	Osmia bicornis	Def1	ENSOBBG00005013070	ad66afc38d4abac7e5e4f3505a358077	102	PRINTS	PR00271	Defensin signature	79	88	5.3E-5	TRUE	2025-06-26	IPR017982	Defensin, insect	-	-
Megachilidae	Osmia bicornis	Def1	ENSOBBG00005013070	ad66afc38d4abac7e5e4f3505a358077	102	SUPERFAMILY	SSF57095	Scorpion toxin-like	51	90	2.43E-9	TRUE	2025-06-26	IPR036574	Knottin, scorpion toxin-like superfamily	-	-
Megachilidae	Osmia bicornis	Def1	ENSOBBG00005013070	ad66afc38d4abac7e5e4f3505a358077	102	ProSiteProfiles	PS51378	Invertebrate defensins family profile.	50	90	10.5109	TRUE	2025-06-26	IPR001542	Defensin, invertebrate/fungal	GO:0006952(InterPro)	-
Megachilidae	Osmia bicornis	Def1	ENSOBBG00005013070	ad66afc38d4abac7e5e4f3505a358077	102	Pfam	PF01097	Arthropod defensin	63	89	2.2E-6	TRUE	2025-06-26	IPR001542	Defensin, invertebrate/fungal	GO:0006952(InterPro)	-
Megachilidae	Osmia bicornis	Def1	ENSOBBG00005013070	ad66afc38d4abac7e5e4f3505a358077	102	Gene3D	G3DSA:3.30.30.10	-	51	91	4.1E-15	TRUE	2025-06-26	IPR036574	Knottin, scorpion toxin-like superfamily	-	-
Megachilidae	Osmia bicornis	Def1	ENSOBBG00005014507	535c48f437fe495a751730c06bedfd6c	154	Gene3D	G3DSA:3.30.30.10	-	50	90	1.5E-13	TRUE	2025-06-26	IPR036574	Knottin, scorpion toxin-like superfamily	-	-
Megachilidae	Osmia bicornis	Def1	ENSOBBG00005014507	535c48f437fe495a751730c06bedfd6c	154	ProSiteProfiles	PS51378	Invertebrate defensins family profile.	49	89	10.4081	TRUE	2025-06-26	IPR001542	Defensin, invertebrate/fungal	GO:0006952(InterPro)	-
Megachilidae	Osmia bicornis	Def1	ENSOBBG00005014507	535c48f437fe495a751730c06bedfd6c	154	Pfam	PF01097	Arthropod defensin	61	88	7.3E-5	TRUE	2025-06-26	IPR001542	Defensin, invertebrate/fungal	GO:0006952(InterPro)	-
Megachilidae	Osmia bicornis	Def1	ENSOBBG00005014507	535c48f437fe495a751730c06bedfd6c	154	SUPERFAMILY	SSF57095	Scorpion toxin-like	50	89	5.06E-8	TRUE	2025-06-26	IPR036574	Knottin, scorpion toxin-like superfamily	-	-
Megachilidae	Stelis phaeoptera	Def1	ENSolsG00005001014	d639afddc3d6e3327842e543f57e7416	111	Pfam	PF01097	Arthropod defensin	72	98	1.1E-5	TRUE	2025-06-26	IPR001542	Defensin, invertebrate/fungal	GO:0006952(InterPro)	-
Megachilidae	Stelis phaeoptera	Def1	ENSolsG00005001014	d639afddc3d6e3327842e543f57e7416	111	Gene3D	G3DSA:3.30.30.10	-	60	100	1.0E-14	TRUE	2025-06-26	IPR036574	Knottin, scorpion toxin-like superfamily	-	-
Megachilidae	Stelis phaeoptera	Def1	ENSolsG00005001014	d639afddc3d6e3327842e543f57e7416	111	SUPERFAMILY	SSF57095	Scorpion toxin-like	60	99	4.51E-9	TRUE	2025-06-26	IPR036574	Knottin, scorpion toxin-like superfamily	-	-
Megachilidae	Stelis phaeoptera	Def1	ENSolsG00005001014	d639afddc3d6e3327842e543f57e7416	111	ProSiteProfiles	PS51378	Invertebrate defensins family profile.	59	99	10.367	TRUE	2025-06-26	IPR001542	Defensin, invertebrate/fungal	GO:0006952(InterPro)	-
Megachilidae	Stelis phaeoptera	Def1	ENSolsG00005001328	872271635f89125474415c5b3c6fa04d	76	Gene3D	G3DSA:3.30.30.10	-	38	76	3.4E-5	TRUE	2025-06-26	IPR036574	Knottin, scorpion toxin-like superfamily	-	-
Megachilidae	Stelis phaeoptera	Def1	ENSolsG00005005677	ce10f438534f152bea871bbed6ba5aca	77	Pfam	PF01097	Arthropod defensin	46	76	0.46	TRUE	2025-06-26	IPR001542	Defensin, invertebrate/fungal	GO:0006952(InterPro)	-
Melittidae	Macropis europaea	Def1	ENSMEOG00010000348	ae54033a98de6ebfc0d7047b3c1feaa1	99	SUPERFAMILY	SSF57095	Scorpion toxin-like	49	86	1.8E-10	TRUE	2025-06-26	IPR036574	Knottin, scorpion toxin-like superfamily	-	-
Melittidae	Macropis europaea	Def1	ENSMEOG00010000348	ae54033a98de6ebfc0d7047b3c1feaa1	99	Gene3D	G3DSA:3.30.30.10	-	49	88	1.0E-15	TRUE	2025-06-26	IPR036574	Knottin, scorpion toxin-like superfamily	-	-
Melittidae	Macropis europaea	Def1	ENSMEOG00010000348	ae54033a98de6ebfc0d7047b3c1feaa1	99	Pfam	PF01097	Arthropod defensin	59	86	1.3E-6	TRUE	2025-06-26	IPR001542	Defensin, invertebrate/fungal	GO:0006952(InterPro)	-
Melittidae	Macropis europaea	Def1	ENSMEOG00010000348	ae54033a98de6ebfc0d7047b3c1feaa1	99	PRINTS	PR00271	Defensin signature	59	68	8.2E-5	TRUE	2025-06-26	IPR017982	Defensin, insect	-	-
Melittidae	Macropis europaea	Def1	ENSMEOG00010000348	ae54033a98de6ebfc0d7047b3c1feaa1	99	PRINTS	PR00271	Defensin signature	68	76	8.2E-5	TRUE	2025-06-26	IPR017982	Defensin, insect	-	-
Melittidae	Macropis europaea	Def1	ENSMEOG00010000348	ae54033a98de6ebfc0d7047b3c1feaa1	99	PRINTS	PR00271	Defensin signature	76	85	8.2E-5	TRUE	2025-06-26	IPR017982	Defensin, insect	-	-
Melittidae	Macropis europaea	Def1	ENSMEOG00010000348	ae54033a98de6ebfc0d7047b3c1feaa1	99	ProSiteProfiles	PS51378	Invertebrate defensins family profile.	48	87	10.331	TRUE	2025-06-26	IPR001542	Defensin, invertebrate/fungal	GO:0006952(InterPro)	-
Philanthidae	Cerceris rybyensis	Def1	ENSCRYG00005002598	2d4855958e3bf3f6d6bd7172b2b67b37	92	Gene3D	G3DSA:3.30.30.10	-	41	81	7.5E-15	TRUE	2025-06-26	IPR036574	Knottin, scorpion toxin-like superfamily	-	-
Philanthidae	Cerceris rybyensis	Def1	ENSCRYG00005002598	2d4855958e3bf3f6d6bd7172b2b67b37	92	Pfam	PF01097	Arthropod defensin	53	79	3.4E-6	TRUE	2025-06-26	IPR001542	Defensin, invertebrate/fungal	GO:0006952(InterPro)	-
Philanthidae	Cerceris rybyensis	Def1	ENSCRYG00005002598	2d4855958e3bf3f6d6bd7172b2b67b37	92	SUPERFAMILY	SSF57095	Scorpion toxin-like	41	79	3.88E-9	TRUE	2025-06-26	IPR036574	Knottin, scorpion toxin-like superfamily	-	-
Philanthidae	Cerceris rybyensis	Def1	ENSCRYG00005002598	2d4855958e3bf3f6d6bd7172b2b67b37	92	PRINTS	PR00271	Defensin signature	52	61	6.7E-5	TRUE	2025-06-26	IPR017982	Defensin, insect	-	-
Philanthidae	Cerceris rybyensis	Def1	ENSCRYG00005002598	2d4855958e3bf3f6d6bd7172b2b67b37	92	PRINTS	PR00271	Defensin signature	61	69	6.7E-5	TRUE	2025-06-26	IPR017982	Defensin, insect	-	-
Philanthidae	Cerceris rybyensis	Def1	ENSCRYG00005002598	2d4855958e3bf3f6d6bd7172b2b67b37	92	PRINTS	PR00271	Defensin signature	69	78	6.7E-5	TRUE	2025-06-26	IPR017982	Defensin, insect	-	-
Philanthidae	Cerceris rybyensis	Def1	ENSCRYG00005002598	2d4855958e3bf3f6d6bd7172b2b67b37	92	ProSiteProfiles	PS51378	Invertebrate defensins family profile.	40	80	10.331	TRUE	2025-06-26	IPR001542	Defensin, invertebrate/fungal	GO:0006952(InterPro)	-
Pteromalidae	Nasonia vitripennis	Def1	GeneID 100115742	9a2181e6a65fc13f764897eb383b5d4a	101	Pfam	PF01097	Arthropod defensin	58	88	5.3E-5	TRUE	2025-06-26	IPR001542	Defensin, invertebrate/fungal	GO:0006952(InterPro)	-
Pteromalidae	Nasonia vitripennis	Def1	GeneID 100115742	9a2181e6a65fc13f764897eb383b5d4a	101	ProSiteProfiles	PS51378	Invertebrate defensins family profile.	49	89	10.0174	TRUE	2025-06-26	IPR001542	Defensin, invertebrate/fungal	GO:0006952(InterPro)	-
Pteromalidae	Nasonia vitripennis	Def1	GeneID 100115742	9a2181e6a65fc13f764897eb383b5d4a	101	Gene3D	G3DSA:3.30.30.10	-	50	90	7.7E-15	TRUE	2025-06-26	IPR036574	Knottin, scorpion toxin-like superfamily	-	-
Pteromalidae	Nasonia vitripennis	Def1	GeneID 100115742	9a2181e6a65fc13f764897eb383b5d4a	101	SMART	SM00505	gth 4	51	91	8.3E-4	TRUE	2025-06-26	IPR003614	Knottin, scorpion toxin-like	GO:0006952(InterPro)	-
Pteromalidae	Nasonia vitripennis	Def1	GeneID 100115742	9a2181e6a65fc13f764897eb383b5d4a	101	SUPERFAMILY	SSF57095	Scorpion toxin-like	50	89	7.26E-8	TRUE	2025-06-26	IPR036574	Knottin, scorpion toxin-like superfamily	-	-
Pteromalidae	Nasonia vitripennis	Def1	GeneID 100310843	f491a45dd2985cc97cd6f76a2a83e8ca	101	Gene3D	G3DSA:3.30.30.10	-	50	90	1.0E-15	TRUE	2025-06-26	IPR036574	Knottin, scorpion toxin-like superfamily	-	-
Pteromalidae	Nasonia vitripennis	Def1	GeneID 100310843	f491a45dd2985cc97cd6f76a2a83e8ca	101	Pfam	PF01097	Arthropod defensin	57	88	8.0E-6	TRUE	2025-06-26	IPR001542	Defensin, invertebrate/fungal	GO:0006952(InterPro)	-
Pteromalidae	Nasonia vitripennis	Def1	GeneID 100310843	f491a45dd2985cc97cd6f76a2a83e8ca	101	SUPERFAMILY	SSF57095	Scorpion toxin-like	50	89	6.92E-9	TRUE	2025-06-26	IPR036574	Knottin, scorpion toxin-like superfamily	-	-
Pteromalidae	Nasonia vitripennis	Def1	GeneID 100310843	f491a45dd2985cc97cd6f76a2a83e8ca	101	ProSiteProfiles	PS51378	Invertebrate defensins family profile.	49	89	10.3772	TRUE	2025-06-26	IPR001542	Defensin, invertebrate/fungal	GO:0006952(InterPro)	-
Tenthredinidae	Athalia rosae	Def1	ENSAEAG00005003741	c3789b62210eae93daca2d02293a5855	103	Gene3D	G3DSA:3.30.30.10	-	67	98	1.3E-5	TRUE	2025-06-26	IPR036574	Knottin, scorpion toxin-like superfamily	-	-
Andrenidae	Andrena bucephala	Def2	ENSRADG00005002384	8bde4cbbe982e42dc65d8abd7a604d4e	103	Pfam	PF01097	Arthropod defensin	70	102	3.5E-8	TRUE	2025-06-26	IPR001542	Defensin, invertebrate/fungal	GO:0006952(InterPro)	-
Andrenidae	Andrena bucephala	Def2	ENSRADG00005002384	8bde4cbbe982e42dc65d8abd7a604d4e	103	SUPERFAMILY	SSF57095	Scorpion toxin-like	61	103	9.69E-10	TRUE	2025-06-26	IPR036574	Knottin, scorpion toxin-like superfamily	-	-
Andrenidae	Andrena bucephala	Def2	ENSRADG00005002384	8bde4cbbe982e42dc65d8abd7a604d4e	103	Gene3D	G3DSA:3.30.30.10	-	61	102	4.3E-18	TRUE	2025-06-26	IPR036574	Knottin, scorpion toxin-like superfamily	-	-
Andrenidae	Andrena bucephala	Def2	ENSRADG00005002384	8bde4cbbe982e42dc65d8abd7a604d4e	103	ProSiteProfiles	PS51378	Invertebrate defensins family profile.	60	103	9.59597	TRUE	2025-06-26	IPR001542	Defensin, invertebrate/fungal	GO:0006952(InterPro)	-
Andrenidae	Andrena bucephala	Def2	ENSRADG00005002540	963aeefc0f32044abb7b713529740b32	154	ProSiteProfiles	PS51378	Invertebrate defensins family profile.	111	154	8.99974	TRUE	2025-06-26	IPR001542	Defensin, invertebrate/fungal	GO:0006952(InterPro)	-
Andrenidae	Andrena bucephala	Def2	ENSRADG00005002540	963aeefc0f32044abb7b713529740b32	154	Pfam	PF01097	Arthropod defensin	122	153	2.5E-7	TRUE	2025-06-26	IPR001542	Defensin, invertebrate/fungal	GO:0006952(InterPro)	-
Andrenidae	Andrena bucephala	Def2	ENSRADG00005002540	963aeefc0f32044abb7b713529740b32	154	SUPERFAMILY	SSF57095	Scorpion toxin-like	112	154	1.65E-8	TRUE	2025-06-26	IPR036574	Knottin, scorpion toxin-like superfamily	-	-
Andrenidae	Andrena bucephala	Def2	ENSRADG00005002540	963aeefc0f32044abb7b713529740b32	154	Gene3D	G3DSA:3.30.30.10	-	112	153	3.1E-17	TRUE	2025-06-26	IPR036574	Knottin, scorpion toxin-like superfamily	-	-
Andrenidae	Andrena bucephala	Def2	ENSRADG00005002540	963aeefc0f32044abb7b713529740b32	154	SMART	SM00505	gth 4	113	154	0.0053	TRUE	2025-06-26	IPR003614	Knottin, scorpion toxin-like	GO:0006952(InterPro)	-
Andrenidae	Andrena chrysosceles	Def2	ENSEQOG00000012516	d5a9ec1964f15faeb81c1b33e32b1de8	103	Gene3D	G3DSA:3.30.30.10	-	61	102	4.3E-18	TRUE	2025-06-26	IPR036574	Knottin, scorpion toxin-like superfamily	-	-
Andrenidae	Andrena chrysosceles	Def2	ENSEQOG00000012516	d5a9ec1964f15faeb81c1b33e32b1de8	103	Pfam	PF01097	Arthropod defensin	70	102	3.5E-8	TRUE	2025-06-26	IPR001542	Defensin, invertebrate/fungal	GO:0006952(InterPro)	-
Andrenidae	Andrena chrysosceles	Def2	ENSEQOG00000012516	d5a9ec1964f15faeb81c1b33e32b1de8	103	SUPERFAMILY	SSF57095	Scorpion toxin-like	61	103	9.69E-10	TRUE	2025-06-26	IPR036574	Knottin, scorpion toxin-like superfamily	-	-
Andrenidae	Andrena chrysosceles	Def2	ENSEQOG00000012516	d5a9ec1964f15faeb81c1b33e32b1de8	103	ProSiteProfiles	PS51378	Invertebrate defensins family profile.	60	103	9.59597	TRUE	2025-06-26	IPR001542	Defensin, invertebrate/fungal	GO:0006952(InterPro)	-
Andrenidae	Andrena dorsata	Def2	ENSADOG00000011238	9791b07b93674fc13789ea339ccbcd80	103	Gene3D	G3DSA:3.30.30.10	-	61	102	4.3E-18	TRUE	2025-06-26	IPR036574	Knottin, scorpion toxin-like superfamily	-	-
Andrenidae	Andrena dorsata	Def2	ENSADOG00000011238	9791b07b93674fc13789ea339ccbcd80	103	Pfam	PF01097	Arthropod defensin	70	102	3.5E-8	TRUE	2025-06-26	IPR001542	Defensin, invertebrate/fungal	GO:0006952(InterPro)	-
Andrenidae	Andrena dorsata	Def2	ENSADOG00000011238	9791b07b93674fc13789ea339ccbcd80	103	SUPERFAMILY	SSF57095	Scorpion toxin-like	61	103	9.69E-10	TRUE	2025-06-26	IPR036574	Knottin, scorpion toxin-like superfamily	-	-
Andrenidae	Andrena dorsata	Def2	ENSADOG00000011238	9791b07b93674fc13789ea339ccbcd80	103	ProSiteProfiles	PS51378	Invertebrate defensins family profile.	60	103	9.59597	TRUE	2025-06-26	IPR001542	Defensin, invertebrate/fungal	GO:0006952(InterPro)	-
Andrenidae	Andrena dorsata	Def2	ENSADOG00000012062	b016be318e0a7841fe8d362bedfa3885	108	Gene3D	G3DSA:3.30.30.10	-	66	107	1.5E-17	TRUE	2025-06-26	IPR036574	Knottin, scorpion toxin-like superfamily	-	-
Andrenidae	Andrena dorsata	Def2	ENSADOG00000012062	b016be318e0a7841fe8d362bedfa3885	108	SUPERFAMILY	SSF57095	Scorpion toxin-like	66	108	3.46E-9	TRUE	2025-06-26	IPR036574	Knottin, scorpion toxin-like superfamily	-	-
Andrenidae	Andrena dorsata	Def2	ENSADOG00000012062	b016be318e0a7841fe8d362bedfa3885	108	SMART	SM00505	gth 4	67	108	0.0062	TRUE	2025-06-26	IPR003614	Knottin, scorpion toxin-like	GO:0006952(InterPro)	-
Andrenidae	Andrena dorsata	Def2	ENSADOG00000012062	b016be318e0a7841fe8d362bedfa3885	108	Pfam	PF01097	Arthropod defensin	75	107	1.3E-7	TRUE	2025-06-26	IPR001542	Defensin, invertebrate/fungal	GO:0006952(InterPro)	-
Andrenidae	Andrena dorsata	Def2	ENSADOG00000012062	b016be318e0a7841fe8d362bedfa3885	108	ProSiteProfiles	PS51378	Invertebrate defensins family profile.	65	108	8.98946	TRUE	2025-06-26	IPR001542	Defensin, invertebrate/fungal	GO:0006952(InterPro)	-
Andrenidae	Andrena fulva	Def2	ENSAFVG00005000409	35fa5832cab9da6a4070e972ec64c62e	103	SUPERFAMILY	SSF57095	Scorpion toxin-like	61	103	9.69E-10	TRUE	2025-06-26	IPR036574	Knottin, scorpion toxin-like superfamily	-	-
Andrenidae	Andrena fulva	Def2	ENSAFVG00005000409	35fa5832cab9da6a4070e972ec64c62e	103	Gene3D	G3DSA:3.30.30.10	-	61	102	4.3E-18	TRUE	2025-06-26	IPR036574	Knottin, scorpion toxin-like superfamily	-	-
Andrenidae	Andrena fulva	Def2	ENSAFVG00005000409	35fa5832cab9da6a4070e972ec64c62e	103	ProSiteProfiles	PS51378	Invertebrate defensins family profile.	60	103	9.59597	TRUE	2025-06-26	IPR001542	Defensin, invertebrate/fungal	GO:0006952(InterPro)	-
Andrenidae	Andrena fulva	Def2	ENSAFVG00005000409	35fa5832cab9da6a4070e972ec64c62e	103	Pfam	PF01097	Arthropod defensin	70	102	3.5E-8	TRUE	2025-06-26	IPR001542	Defensin, invertebrate/fungal	GO:0006952(InterPro)	-
Andrenidae	Andrena fulva	Def2	ENSAFVG00005004563	60440d106973314d37827c479ed290c4	108	Pfam	PF01097	Arthropod defensin	75	107	1.3E-7	TRUE	2025-06-26	IPR001542	Defensin, invertebrate/fungal	GO:0006952(InterPro)	-
Andrenidae	Andrena fulva	Def2	ENSAFVG00005004563	60440d106973314d37827c479ed290c4	108	ProSiteProfiles	PS51378	Invertebrate defensins family profile.	65	108	8.99974	TRUE	2025-06-26	IPR001542	Defensin, invertebrate/fungal	GO:0006952(InterPro)	-
Andrenidae	Andrena fulva	Def2	ENSAFVG00005004563	60440d106973314d37827c479ed290c4	108	SMART	SM00505	gth 4	67	108	0.0053	TRUE	2025-06-26	IPR003614	Knottin, scorpion toxin-like	GO:0006952(InterPro)	-
Andrenidae	Andrena fulva	Def2	ENSAFVG00005004563	60440d106973314d37827c479ed290c4	108	Gene3D	G3DSA:3.30.30.10	-	66	107	1.5E-17	TRUE	2025-06-26	IPR036574	Knottin, scorpion toxin-like superfamily	-	-
Andrenidae	Andrena fulva	Def2	ENSAFVG00005004563	60440d106973314d37827c479ed290c4	108	SUPERFAMILY	SSF57095	Scorpion toxin-like	66	108	7.74E-9	TRUE	2025-06-26	IPR036574	Knottin, scorpion toxin-like superfamily	-	-
Andrenidae	Andrena haemorrhoa	Def2	ENSAHEG00005013989	b20ea1a891bf9b17e4eccf64ae2fdf32	160	SMART	SM00505	gth 4	119	160	5.4E-4	TRUE	2025-06-26	IPR003614	Knottin, scorpion toxin-like	GO:0006952(InterPro)	-
Andrenidae	Andrena haemorrhoa	Def2	ENSAHEG00005013989	b20ea1a891bf9b17e4eccf64ae2fdf32	160	Gene3D	G3DSA:3.30.30.10	-	118	159	4.3E-17	TRUE	2025-06-26	IPR036574	Knottin, scorpion toxin-like superfamily	-	-
Andrenidae	Andrena haemorrhoa	Def2	ENSAHEG00005013989	b20ea1a891bf9b17e4eccf64ae2fdf32	160	SUPERFAMILY	SSF57095	Scorpion toxin-like	118	160	6.41E-9	TRUE	2025-06-26	IPR036574	Knottin, scorpion toxin-like superfamily	-	-
Andrenidae	Andrena haemorrhoa	Def2	ENSAHEG00005013989	b20ea1a891bf9b17e4eccf64ae2fdf32	160	ProSiteProfiles	PS51378	Invertebrate defensins family profile.	117	160	9.33384	TRUE	2025-06-26	IPR001542	Defensin, invertebrate/fungal	GO:0006952(InterPro)	-
Andrenidae	Andrena haemorrhoa	Def2	ENSAHEG00005013989	b20ea1a891bf9b17e4eccf64ae2fdf32	160	Pfam	PF01097	Arthropod defensin	127	159	2.9E-6	TRUE	2025-06-26	IPR001542	Defensin, invertebrate/fungal	GO:0006952(InterPro)	-
Andrenidae	Andrena hattorfiana	Def2	ENSAHTG00000012437	7000a5c28ae3f2eaa56ad835d5a39564	154	Gene3D	G3DSA:3.30.30.10	-	112	153	2.1E-17	TRUE	2025-06-26	IPR036574	Knottin, scorpion toxin-like superfamily	-	-
Andrenidae	Andrena hattorfiana	Def2	ENSAHTG00000012437	7000a5c28ae3f2eaa56ad835d5a39564	154	ProSiteProfiles	PS51378	Invertebrate defensins family profile.	111	154	9.57541	TRUE	2025-06-26	IPR001542	Defensin, invertebrate/fungal	GO:0006952(InterPro)	-
Andrenidae	Andrena hattorfiana	Def2	ENSAHTG00000012437	7000a5c28ae3f2eaa56ad835d5a39564	154	SUPERFAMILY	SSF57095	Scorpion toxin-like	112	154	3.7E-9	TRUE	2025-06-26	IPR036574	Knottin, scorpion toxin-like superfamily	-	-
Andrenidae	Andrena hattorfiana	Def2	ENSAHTG00000012437	7000a5c28ae3f2eaa56ad835d5a39564	154	SMART	SM00505	gth 4	113	154	0.0076	TRUE	2025-06-26	IPR003614	Knottin, scorpion toxin-like	GO:0006952(InterPro)	-
Andrenidae	Andrena hattorfiana	Def2	ENSAHTG00000012437	7000a5c28ae3f2eaa56ad835d5a39564	154	Pfam	PF01097	Arthropod defensin	121	153	6.9E-8	TRUE	2025-06-26	IPR001542	Defensin, invertebrate/fungal	GO:0006952(InterPro)	-
Andrenidae	Andrena minutula	Def2	ENSELIG00005002122	a8236a7911a16558331d8963a2e50046	154	SUPERFAMILY	SSF57095	Scorpion toxin-like	112	154	8.55E-9	TRUE	2025-06-26	IPR036574	Knottin, scorpion toxin-like superfamily	-	-
Andrenidae	Andrena minutula	Def2	ENSELIG00005002122	a8236a7911a16558331d8963a2e50046	154	ProSiteProfiles	PS51378	Invertebrate defensins family profile.	111	154	8.98946	TRUE	2025-06-26	IPR001542	Defensin, invertebrate/fungal	GO:0006952(InterPro)	-
Andrenidae	Andrena minutula	Def2	ENSELIG00005002122	a8236a7911a16558331d8963a2e50046	154	SMART	SM00505	gth 4	113	154	0.0062	TRUE	2025-06-26	IPR003614	Knottin, scorpion toxin-like	GO:0006952(InterPro)	-
Andrenidae	Andrena minutula	Def2	ENSELIG00005002122	a8236a7911a16558331d8963a2e50046	154	Gene3D	G3DSA:3.30.30.10	-	112	153	3.0E-17	TRUE	2025-06-26	IPR036574	Knottin, scorpion toxin-like superfamily	-	-
Andrenidae	Andrena minutula	Def2	ENSELIG00005002122	a8236a7911a16558331d8963a2e50046	154	Pfam	PF01097	Arthropod defensin	121	153	2.5E-7	TRUE	2025-06-26	IPR001542	Defensin, invertebrate/fungal	GO:0006952(InterPro)	-
Andrenidae	Andrena minutula	Def2	ENSELIG00005002334	6d635b012a9cf8a09d3094e14d72a271	103	Gene3D	G3DSA:3.30.30.10	-	61	102	4.3E-18	TRUE	2025-06-26	IPR036574	Knottin, scorpion toxin-like superfamily	-	-
Andrenidae	Andrena minutula	Def2	ENSELIG00005002334	6d635b012a9cf8a09d3094e14d72a271	103	Pfam	PF01097	Arthropod defensin	70	102	3.5E-8	TRUE	2025-06-26	IPR001542	Defensin, invertebrate/fungal	GO:0006952(InterPro)	-
Andrenidae	Andrena minutula	Def2	ENSELIG00005002334	6d635b012a9cf8a09d3094e14d72a271	103	SUPERFAMILY	SSF57095	Scorpion toxin-like	61	103	9.69E-10	TRUE	2025-06-26	IPR036574	Knottin, scorpion toxin-like superfamily	-	-
Andrenidae	Andrena minutula	Def2	ENSELIG00005002334	6d635b012a9cf8a09d3094e14d72a271	103	ProSiteProfiles	PS51378	Invertebrate defensins family profile.	60	103	9.59597	TRUE	2025-06-26	IPR001542	Defensin, invertebrate/fungal	GO:0006952(InterPro)	-
Andrenidae	Andrena trimmerana	Def2	ENSFOKG00000002742	9882c54b3a85e18f385669be67fd9291	103	Pfam	PF01097	Arthropod defensin	70	102	3.5E-8	TRUE	2025-06-26	IPR001542	Defensin, invertebrate/fungal	GO:0006952(InterPro)	-
Andrenidae	Andrena trimmerana	Def2	ENSFOKG00000002742	9882c54b3a85e18f385669be67fd9291	103	SUPERFAMILY	SSF57095	Scorpion toxin-like	61	103	9.69E-10	TRUE	2025-06-26	IPR036574	Knottin, scorpion toxin-like superfamily	-	-
Andrenidae	Andrena trimmerana	Def2	ENSFOKG00000002742	9882c54b3a85e18f385669be67fd9291	103	Gene3D	G3DSA:3.30.30.10	-	61	102	4.3E-18	TRUE	2025-06-26	IPR036574	Knottin, scorpion toxin-like superfamily	-	-
Andrenidae	Andrena trimmerana	Def2	ENSFOKG00000002742	9882c54b3a85e18f385669be67fd9291	103	ProSiteProfiles	PS51378	Invertebrate defensins family profile.	60	103	9.59597	TRUE	2025-06-26	IPR001542	Defensin, invertebrate/fungal	GO:0006952(InterPro)	-
Andrenidae	Andrena trimmerana	Def2	ENSFOKG00000003041	e358d022d686c7beb1146b7d10885bed	154	ProSiteProfiles	PS51378	Invertebrate defensins family profile.	111	154	8.99974	TRUE	2025-06-26	IPR001542	Defensin, invertebrate/fungal	GO:0006952(InterPro)	-
Andrenidae	Andrena trimmerana	Def2	ENSFOKG00000003041	e358d022d686c7beb1146b7d10885bed	154	Pfam	PF01097	Arthropod defensin	122	153	2.5E-7	TRUE	2025-06-26	IPR001542	Defensin, invertebrate/fungal	GO:0006952(InterPro)	-
Andrenidae	Andrena trimmerana	Def2	ENSFOKG00000003041	e358d022d686c7beb1146b7d10885bed	154	Gene3D	G3DSA:3.30.30.10	-	112	153	3.1E-17	TRUE	2025-06-26	IPR036574	Knottin, scorpion toxin-like superfamily	-	-
Andrenidae	Andrena trimmerana	Def2	ENSFOKG00000003041	e358d022d686c7beb1146b7d10885bed	154	SUPERFAMILY	SSF57095	Scorpion toxin-like	112	154	1.65E-8	TRUE	2025-06-26	IPR036574	Knottin, scorpion toxin-like superfamily	-	-
Andrenidae	Andrena trimmerana	Def2	ENSFOKG00000003041	e358d022d686c7beb1146b7d10885bed	154	SMART	SM00505	gth 4	113	154	0.0053	TRUE	2025-06-26	IPR003614	Knottin, scorpion toxin-like	GO:0006952(InterPro)	-
Apidae	Apis dorsata	Def2	LOC102675783	585c372ea969a4f560c5a35179315628	103	SUPERFAMILY	SSF57095	Scorpion toxin-like	61	102	1.72E-7	TRUE	2025-06-26	IPR036574	Knottin, scorpion toxin-like superfamily	-	-
Apidae	Apis dorsata	Def2	LOC102675783	585c372ea969a4f560c5a35179315628	103	Gene3D	G3DSA:3.30.30.10	-	61	102	9.0E-15	TRUE	2025-06-26	IPR036574	Knottin, scorpion toxin-like superfamily	-	-
Apidae	Apis dorsata	Def2	LOC102675783	585c372ea969a4f560c5a35179315628	103	Pfam	PF01097	Arthropod defensin	70	102	2.3E-6	TRUE	2025-06-26	IPR001542	Defensin, invertebrate/fungal	GO:0006952(InterPro)	-
Apidae	Apis florea	Def2	LOC100867071	4ccdcf8f5c67f59419fad79062b165a8	103	SUPERFAMILY	SSF57095	Scorpion toxin-like	61	102	2.52E-8	TRUE	2025-06-26	IPR036574	Knottin, scorpion toxin-like superfamily	-	-
Apidae	Apis florea	Def2	LOC100867071	4ccdcf8f5c67f59419fad79062b165a8	103	Gene3D	G3DSA:3.30.30.10	-	61	102	1.3E-15	TRUE	2025-06-26	IPR036574	Knottin, scorpion toxin-like superfamily	-	-
Apidae	Apis florea	Def2	LOC100867071	4ccdcf8f5c67f59419fad79062b165a8	103	ProSiteProfiles	PS51378	Invertebrate defensins family profile.	60	103	9.09226	TRUE	2025-06-26	IPR001542	Defensin, invertebrate/fungal	GO:0006952(InterPro)	-
Apidae	Apis florea	Def2	LOC100867071	4ccdcf8f5c67f59419fad79062b165a8	103	Pfam	PF01097	Arthropod defensin	71	102	2.1E-7	TRUE	2025-06-26	IPR001542	Defensin, invertebrate/fungal	GO:0006952(InterPro)	-
Apidae	Apis mellifera	Def2	GeneID 413397	be56e5ea5ce06fa360d2651a24bc5821	104	Pfam	PF01097	Arthropod defensin	71	103	7.5E-8	TRUE	2025-06-26	IPR001542	Defensin, invertebrate/fungal	GO:0006952(InterPro)	-
Apidae	Apis mellifera	Def2	GeneID 413397	be56e5ea5ce06fa360d2651a24bc5821	104	SMART	SM00505	gth 4	63	104	0.0051	TRUE	2025-06-26	IPR003614	Knottin, scorpion toxin-like	GO:0006952(InterPro)	-
Apidae	Apis mellifera	Def2	GeneID 413397	be56e5ea5ce06fa360d2651a24bc5821	104	ProSiteProfiles	PS51378	Invertebrate defensins family profile.	61	104	9.2002	TRUE	2025-06-26	IPR001542	Defensin, invertebrate/fungal	GO:0006952(InterPro)	-
Apidae	Apis mellifera	Def2	GeneID 413397	be56e5ea5ce06fa360d2651a24bc5821	104	SUPERFAMILY	SSF57095	Scorpion toxin-like	62	104	2.54E-9	TRUE	2025-06-26	IPR036574	Knottin, scorpion toxin-like superfamily	-	-
Apidae	Apis mellifera	Def2	GeneID 413397	be56e5ea5ce06fa360d2651a24bc5821	104	Gene3D	G3DSA:3.30.30.10	-	62	103	1.1E-17	TRUE	2025-06-26	IPR036574	Knottin, scorpion toxin-like superfamily	-	-
Apidae	Eufriesea mexicana	Def2	LOC108552460	354711470e0e0a24bf24e6e4bfe6f12a	106	SMART	SM00505	gth 4	65	106	0.0045	TRUE	2025-06-26	IPR003614	Knottin, scorpion toxin-like	GO:0006952(InterPro)	-
Apidae	Eufriesea mexicana	Def2	LOC108552460	354711470e0e0a24bf24e6e4bfe6f12a	106	Gene3D	G3DSA:3.30.30.10	-	64	105	5.2E-19	TRUE	2025-06-26	IPR036574	Knottin, scorpion toxin-like superfamily	-	-
Apidae	Eufriesea mexicana	Def2	LOC108552460	354711470e0e0a24bf24e6e4bfe6f12a	106	SUPERFAMILY	SSF57095	Scorpion toxin-like	64	106	1.86E-9	TRUE	2025-06-26	IPR036574	Knottin, scorpion toxin-like superfamily	-	-
Apidae	Eufriesea mexicana	Def2	LOC108552460	354711470e0e0a24bf24e6e4bfe6f12a	106	ProSiteProfiles	PS51378	Invertebrate defensins family profile.	63	106	9.90436	TRUE	2025-06-26	IPR001542	Defensin, invertebrate/fungal	GO:0006952(InterPro)	-
Apidae	Eufriesea mexicana	Def2	LOC108552460	354711470e0e0a24bf24e6e4bfe6f12a	106	Pfam	PF01097	Arthropod defensin	73	105	6.0E-9	TRUE	2025-06-26	IPR001542	Defensin, invertebrate/fungal	GO:0006952(InterPro)	-
Apidae	Habropoda laboriosa	Def2	LOC108573578	3030a2c26d91b8915b7b7ac9fbcc1215	108	Gene3D	G3DSA:3.30.30.10	-	66	107	1.2E-17	TRUE	2025-06-26	IPR036574	Knottin, scorpion toxin-like superfamily	-	-
Apidae	Habropoda laboriosa	Def2	LOC108573578	3030a2c26d91b8915b7b7ac9fbcc1215	108	SUPERFAMILY	SSF57095	Scorpion toxin-like	66	108	3.04E-9	TRUE	2025-06-26	IPR036574	Knottin, scorpion toxin-like superfamily	-	-
Apidae	Habropoda laboriosa	Def2	LOC108573578	3030a2c26d91b8915b7b7ac9fbcc1215	108	ProSiteProfiles	PS51378	Invertebrate defensins family profile.	65	108	9.29271	TRUE	2025-06-26	IPR001542	Defensin, invertebrate/fungal	GO:0006952(InterPro)	-
Apidae	Habropoda laboriosa	Def2	LOC108573578	3030a2c26d91b8915b7b7ac9fbcc1215	108	Pfam	PF01097	Arthropod defensin	75	107	1.3E-7	TRUE	2025-06-26	IPR001542	Defensin, invertebrate/fungal	GO:0006952(InterPro)	-
Apidae	Nomada fabriciana	Def2	ENSNFBG00000008616	e38cac95e5e95dcd52ad981d95995ebe	104	Gene3D	G3DSA:3.30.30.10	-	62	103	5.0E-19	TRUE	2025-06-26	IPR036574	Knottin, scorpion toxin-like superfamily	-	-
Apidae	Nomada fabriciana	Def2	ENSNFBG00000008616	e38cac95e5e95dcd52ad981d95995ebe	104	ProSiteProfiles	PS51378	Invertebrate defensins family profile.	61	104	9.77073	TRUE	2025-06-26	IPR001542	Defensin, invertebrate/fungal	GO:0006952(InterPro)	-
Apidae	Nomada fabriciana	Def2	ENSNFBG00000008616	e38cac95e5e95dcd52ad981d95995ebe	104	Pfam	PF01097	Arthropod defensin	71	103	2.7E-8	TRUE	2025-06-26	IPR001542	Defensin, invertebrate/fungal	GO:0006952(InterPro)	-
Apidae	Nomada fabriciana	Def2	ENSNFBG00000008616	e38cac95e5e95dcd52ad981d95995ebe	104	SUPERFAMILY	SSF57095	Scorpion toxin-like	62	104	8.54E-10	TRUE	2025-06-26	IPR036574	Knottin, scorpion toxin-like superfamily	-	-
Apidae	Nomada fabriciana	Def2	ENSNFBG00000008616	e38cac95e5e95dcd52ad981d95995ebe	104	SMART	SM00505	gth 4	63	104	0.003	TRUE	2025-06-26	IPR003614	Knottin, scorpion toxin-like	GO:0006952(InterPro)	-
Apidae	Nomada ferruginata	Def2	ENSEXZG00000006476	02fdc43f8560d2e93ef16f73353e7850	133	Gene3D	G3DSA:3.30.30.10	-	91	132	7.7E-19	TRUE	2025-06-26	IPR036574	Knottin, scorpion toxin-like superfamily	-	-
Apidae	Nomada ferruginata	Def2	ENSEXZG00000006476	02fdc43f8560d2e93ef16f73353e7850	133	SUPERFAMILY	SSF57095	Scorpion toxin-like	91	132	1.11E-9	TRUE	2025-06-26	IPR036574	Knottin, scorpion toxin-like superfamily	-	-
Apidae	Nomada ferruginata	Def2	ENSEXZG00000006476	02fdc43f8560d2e93ef16f73353e7850	133	Pfam	PF01097	Arthropod defensin	100	132	4.0E-8	TRUE	2025-06-26	IPR001542	Defensin, invertebrate/fungal	GO:0006952(InterPro)	-
Apidae	Nomada ferruginata	Def2	ENSEXZG00000006476	02fdc43f8560d2e93ef16f73353e7850	133	ProSiteProfiles	PS51378	Invertebrate defensins family profile.	90	133	9.41093	TRUE	2025-06-26	IPR001542	Defensin, invertebrate/fungal	GO:0006952(InterPro)	-
Apidae	Nomada flava	Def2	ENSQOJG00000011649	9dd9b09eded1ff4e6e0356e4186a1fe8	120	Gene3D	G3DSA:3.30.30.10	-	78	119	6.2E-19	TRUE	2025-06-26	IPR036574	Knottin, scorpion toxin-like superfamily	-	-
Apidae	Nomada flava	Def2	ENSQOJG00000011649	9dd9b09eded1ff4e6e0356e4186a1fe8	120	Pfam	PF01097	Arthropod defensin	87	119	3.3E-8	TRUE	2025-06-26	IPR001542	Defensin, invertebrate/fungal	GO:0006952(InterPro)	-
Apidae	Nomada flava	Def2	ENSQOJG00000011649	9dd9b09eded1ff4e6e0356e4186a1fe8	120	SUPERFAMILY	SSF57095	Scorpion toxin-like	78	119	8.77E-10	TRUE	2025-06-26	IPR036574	Knottin, scorpion toxin-like superfamily	-	-
Apidae	Nomada flava	Def2	ENSQOJG00000011649	9dd9b09eded1ff4e6e0356e4186a1fe8	120	ProSiteProfiles	PS51378	Invertebrate defensins family profile.	77	120	9.41093	TRUE	2025-06-26	IPR001542	Defensin, invertebrate/fungal	GO:0006952(InterPro)	-
Apidae	Nomada fucata	Def2	ENSFANG00005003879	c6936e5b3fdd07c0a6f68846ea18dbf6	104	SMART	SM00505	gth 4	63	104	0.0075	TRUE	2025-06-26	IPR003614	Knottin, scorpion toxin-like	GO:0006952(InterPro)	-
Apidae	Nomada fucata	Def2	ENSFANG00005003879	c6936e5b3fdd07c0a6f68846ea18dbf6	104	Gene3D	G3DSA:3.30.30.10	-	62	103	4.6E-19	TRUE	2025-06-26	IPR036574	Knottin, scorpion toxin-like superfamily	-	-
Apidae	Nomada fucata	Def2	ENSFANG00005003879	c6936e5b3fdd07c0a6f68846ea18dbf6	104	SUPERFAMILY	SSF57095	Scorpion toxin-like	62	104	5.03E-10	TRUE	2025-06-26	IPR036574	Knottin, scorpion toxin-like superfamily	-	-
Apidae	Nomada fucata	Def2	ENSFANG00005003879	c6936e5b3fdd07c0a6f68846ea18dbf6	104	ProSiteProfiles	PS51378	Invertebrate defensins family profile.	61	104	9.80157	TRUE	2025-06-26	IPR001542	Defensin, invertebrate/fungal	GO:0006952(InterPro)	-
Apidae	Nomada fucata	Def2	ENSFANG00005003879	c6936e5b3fdd07c0a6f68846ea18dbf6	104	Pfam	PF01097	Arthropod defensin	71	103	2.5E-8	TRUE	2025-06-26	IPR001542	Defensin, invertebrate/fungal	GO:0006952(InterPro)	-
Apidae	Nomada hirtipes	Def2	ENSXLVG00000006200	d5d7529871cd986de219dfcd5b9463dc	113	ProSiteProfiles	PS51378	Invertebrate defensins family profile.	70	113	9.41093	TRUE	2025-06-26	IPR001542	Defensin, invertebrate/fungal	GO:0006952(InterPro)	-
Apidae	Nomada hirtipes	Def2	ENSXLVG00000006200	d5d7529871cd986de219dfcd5b9463dc	113	Pfam	PF01097	Arthropod defensin	80	112	3.0E-8	TRUE	2025-06-26	IPR001542	Defensin, invertebrate/fungal	GO:0006952(InterPro)	-
Apidae	Nomada hirtipes	Def2	ENSXLVG00000006200	d5d7529871cd986de219dfcd5b9463dc	113	SUPERFAMILY	SSF57095	Scorpion toxin-like	71	112	7.84E-10	TRUE	2025-06-26	IPR036574	Knottin, scorpion toxin-like superfamily	-	-
Apidae	Nomada hirtipes	Def2	ENSXLVG00000006200	d5d7529871cd986de219dfcd5b9463dc	113	Gene3D	G3DSA:3.30.30.10	-	71	112	5.5E-19	TRUE	2025-06-26	IPR036574	Knottin, scorpion toxin-like superfamily	-	-
Apidae	Nomada lathburiana	Def2	ENSZOXG00000012198	63e791b0174448d63bc267caf90ce1d1	104	SMART	SM00505	gth 4	63	104	0.0075	TRUE	2025-06-26	IPR003614	Knottin, scorpion toxin-like	GO:0006952(InterPro)	-
Apidae	Nomada lathburiana	Def2	ENSZOXG00000012198	63e791b0174448d63bc267caf90ce1d1	104	Gene3D	G3DSA:3.30.30.10	-	62	103	4.6E-19	TRUE	2025-06-26	IPR036574	Knottin, scorpion toxin-like superfamily	-	-
Apidae	Nomada lathburiana	Def2	ENSZOXG00000012198	63e791b0174448d63bc267caf90ce1d1	104	SUPERFAMILY	SSF57095	Scorpion toxin-like	62	104	5.03E-10	TRUE	2025-06-26	IPR036574	Knottin, scorpion toxin-like superfamily	-	-
Apidae	Nomada lathburiana	Def2	ENSZOXG00000012198	63e791b0174448d63bc267caf90ce1d1	104	ProSiteProfiles	PS51378	Invertebrate defensins family profile.	61	104	9.80157	TRUE	2025-06-26	IPR001542	Defensin, invertebrate/fungal	GO:0006952(InterPro)	-
Apidae	Nomada lathburiana	Def2	ENSZOXG00000012198	63e791b0174448d63bc267caf90ce1d1	104	Pfam	PF01097	Arthropod defensin	71	103	2.5E-8	TRUE	2025-06-26	IPR001542	Defensin, invertebrate/fungal	GO:0006952(InterPro)	-
Apidae	Nomada panzeri	Def2	ENSFLUG00000015146	9dd9b09eded1ff4e6e0356e4186a1fe8	120	Gene3D	G3DSA:3.30.30.10	-	78	119	6.2E-19	TRUE	2025-06-26	IPR036574	Knottin, scorpion toxin-like superfamily	-	-
Apidae	Nomada panzeri	Def2	ENSFLUG00000015146	9dd9b09eded1ff4e6e0356e4186a1fe8	120	Pfam	PF01097	Arthropod defensin	87	119	3.3E-8	TRUE	2025-06-26	IPR001542	Defensin, invertebrate/fungal	GO:0006952(InterPro)	-
Apidae	Nomada panzeri	Def2	ENSFLUG00000015146	9dd9b09eded1ff4e6e0356e4186a1fe8	120	SUPERFAMILY	SSF57095	Scorpion toxin-like	78	119	8.77E-10	TRUE	2025-06-26	IPR036574	Knottin, scorpion toxin-like superfamily	-	-
Apidae	Nomada panzeri	Def2	ENSFLUG00000015146	9dd9b09eded1ff4e6e0356e4186a1fe8	120	ProSiteProfiles	PS51378	Invertebrate defensins family profile.	77	120	9.41093	TRUE	2025-06-26	IPR001542	Defensin, invertebrate/fungal	GO:0006952(InterPro)	-
Apidae	Nomada ruficornis	Def2	ENSYGNG00000005374	187ff5beca2d15d31a876f1f0315b473	104	ProSiteProfiles	PS51378	Invertebrate defensins family profile.	61	104	9.41093	TRUE	2025-06-26	IPR001542	Defensin, invertebrate/fungal	GO:0006952(InterPro)	-
Apidae	Nomada ruficornis	Def2	ENSYGNG00000005374	187ff5beca2d15d31a876f1f0315b473	104	SUPERFAMILY	SSF57095	Scorpion toxin-like	62	103	6.46E-10	TRUE	2025-06-26	IPR036574	Knottin, scorpion toxin-like superfamily	-	-
Apidae	Nomada ruficornis	Def2	ENSYGNG00000005374	187ff5beca2d15d31a876f1f0315b473	104	Gene3D	G3DSA:3.30.30.10	-	62	103	4.6E-19	TRUE	2025-06-26	IPR036574	Knottin, scorpion toxin-like superfamily	-	-
Apidae	Nomada ruficornis	Def2	ENSYGNG00000005374	187ff5beca2d15d31a876f1f0315b473	104	Pfam	PF01097	Arthropod defensin	71	103	2.5E-8	TRUE	2025-06-26	IPR001542	Defensin, invertebrate/fungal	GO:0006952(InterPro)	-
Colletidae	Colletes gigas	Def2	ENSCGGG00000006655	6b862664ca47df1494b899e19aa8810a	125	ProSiteProfiles	PS51378	Invertebrate defensins family profile.	83	125	10.1871	TRUE	2025-06-26	IPR001542	Defensin, invertebrate/fungal	GO:0006952(InterPro)	-
Colletidae	Colletes gigas	Def2	ENSCGGG00000006655	6b862664ca47df1494b899e19aa8810a	125	Gene3D	G3DSA:3.30.30.10	-	84	125	7.8E-18	TRUE	2025-06-26	IPR036574	Knottin, scorpion toxin-like superfamily	-	-
Colletidae	Colletes gigas	Def2	ENSCGGG00000006655	6b862664ca47df1494b899e19aa8810a	125	Pfam	PF01097	Arthropod defensin	94	125	2.9E-8	TRUE	2025-06-26	IPR001542	Defensin, invertebrate/fungal	GO:0006952(InterPro)	-
Colletidae	Colletes gigas	Def2	ENSCGGG00000006655	6b862664ca47df1494b899e19aa8810a	125	SUPERFAMILY	SSF57095	Scorpion toxin-like	84	125	1.22E-9	TRUE	2025-06-26	IPR036574	Knottin, scorpion toxin-like superfamily	-	-
Colletidae	Hylaeus anthracinus	Def2	LOC128896827	170fafd67073566604c91eb1817c3fcf	97	SMART	SM00505	gth 4	57	97	3.4E-4	TRUE	2025-06-26	IPR003614	Knottin, scorpion toxin-like	GO:0006952(InterPro)	-
Colletidae	Hylaeus anthracinus	Def2	LOC128896827	170fafd67073566604c91eb1817c3fcf	97	ProSiteProfiles	PS51378	Invertebrate defensins family profile.	55	97	9.42121	TRUE	2025-06-26	IPR001542	Defensin, invertebrate/fungal	GO:0006952(InterPro)	-
Colletidae	Hylaeus anthracinus	Def2	LOC128896827	170fafd67073566604c91eb1817c3fcf	97	SUPERFAMILY	SSF57095	Scorpion toxin-like	56	97	1.83E-9	TRUE	2025-06-26	IPR036574	Knottin, scorpion toxin-like superfamily	-	-
Colletidae	Hylaeus anthracinus	Def2	LOC128896827	170fafd67073566604c91eb1817c3fcf	97	Gene3D	G3DSA:3.30.30.10	-	56	97	7.1E-17	TRUE	2025-06-26	IPR036574	Knottin, scorpion toxin-like superfamily	-	-
Colletidae	Hylaeus anthracinus	Def2	LOC128896827	170fafd67073566604c91eb1817c3fcf	97	Pfam	PF01097	Arthropod defensin	66	97	6.6E-8	TRUE	2025-06-26	IPR001542	Defensin, invertebrate/fungal	GO:0006952(InterPro)	-
Colletidae	Hylaeus anthracinus	Def2	LOC128896828	26978b842eaa4791f74702cc063727d5	97	SMART	SM00505	gth 4	57	97	3.4E-4	TRUE	2025-06-26	IPR003614	Knottin, scorpion toxin-like	GO:0006952(InterPro)	-
Colletidae	Hylaeus anthracinus	Def2	LOC128896828	26978b842eaa4791f74702cc063727d5	97	ProSiteProfiles	PS51378	Invertebrate defensins family profile.	55	97	9.42121	TRUE	2025-06-26	IPR001542	Defensin, invertebrate/fungal	GO:0006952(InterPro)	-
Colletidae	Hylaeus anthracinus	Def2	LOC128896828	26978b842eaa4791f74702cc063727d5	97	SUPERFAMILY	SSF57095	Scorpion toxin-like	56	97	1.83E-9	TRUE	2025-06-26	IPR036574	Knottin, scorpion toxin-like superfamily	-	-
Colletidae	Hylaeus anthracinus	Def2	LOC128896828	26978b842eaa4791f74702cc063727d5	97	Gene3D	G3DSA:3.30.30.10	-	56	97	7.1E-17	TRUE	2025-06-26	IPR036574	Knottin, scorpion toxin-like superfamily	-	-
Colletidae	Hylaeus anthracinus	Def2	LOC128896828	26978b842eaa4791f74702cc063727d5	97	Pfam	PF01097	Arthropod defensin	66	97	6.6E-8	TRUE	2025-06-26	IPR001542	Defensin, invertebrate/fungal	GO:0006952(InterPro)	-
Colletidae	Hylaeus volcanicus	Def2	LOC128881882	d30d7f8b743abecf2b1f748746901a55	109	Pfam	PF01097	Arthropod defensin	78	109	8.7E-8	TRUE	2025-06-26	IPR001542	Defensin, invertebrate/fungal	GO:0006952(InterPro)	-
Colletidae	Hylaeus volcanicus	Def2	LOC128881882	d30d7f8b743abecf2b1f748746901a55	109	Gene3D	G3DSA:3.30.30.10	-	68	109	5.2E-17	TRUE	2025-06-26	IPR036574	Knottin, scorpion toxin-like superfamily	-	-
Colletidae	Hylaeus volcanicus	Def2	LOC128881882	d30d7f8b743abecf2b1f748746901a55	109	SMART	SM00505	gth 4	69	109	6.3E-4	TRUE	2025-06-26	IPR003614	Knottin, scorpion toxin-like	GO:0006952(InterPro)	-
Colletidae	Hylaeus volcanicus	Def2	LOC128881882	d30d7f8b743abecf2b1f748746901a55	109	ProSiteProfiles	PS51378	Invertebrate defensins family profile.	67	109	9.58569	TRUE	2025-06-26	IPR001542	Defensin, invertebrate/fungal	GO:0006952(InterPro)	-
Colletidae	Hylaeus volcanicus	Def2	LOC128881882	d30d7f8b743abecf2b1f748746901a55	109	SUPERFAMILY	SSF57095	Scorpion toxin-like	68	109	2.62E-9	TRUE	2025-06-26	IPR036574	Knottin, scorpion toxin-like superfamily	-	-
Colletidae	Hylaeus volcanicus	Def2	LOC128881883	b1a682c589f60bb75729c45fbc40a63a	97	SMART	SM00505	gth 4	57	97	4.6E-4	TRUE	2025-06-26	IPR003614	Knottin, scorpion toxin-like	GO:0006952(InterPro)	-
Colletidae	Hylaeus volcanicus	Def2	LOC128881883	b1a682c589f60bb75729c45fbc40a63a	97	ProSiteProfiles	PS51378	Invertebrate defensins family profile.	55	97	9.42121	TRUE	2025-06-26	IPR001542	Defensin, invertebrate/fungal	GO:0006952(InterPro)	-
Colletidae	Hylaeus volcanicus	Def2	LOC128881883	b1a682c589f60bb75729c45fbc40a63a	97	Pfam	PF01097	Arthropod defensin	66	97	1.0E-7	TRUE	2025-06-26	IPR001542	Defensin, invertebrate/fungal	GO:0006952(InterPro)	-
Colletidae	Hylaeus volcanicus	Def2	LOC128881883	b1a682c589f60bb75729c45fbc40a63a	97	SUPERFAMILY	SSF57095	Scorpion toxin-like	56	97	1.74E-9	TRUE	2025-06-26	IPR036574	Knottin, scorpion toxin-like superfamily	-	-
Colletidae	Hylaeus volcanicus	Def2	LOC128881883	b1a682c589f60bb75729c45fbc40a63a	97	Gene3D	G3DSA:3.30.30.10	-	56	97	1.1E-16	TRUE	2025-06-26	IPR036574	Knottin, scorpion toxin-like superfamily	-	-
Crabronidae	Mimumesa dahlbomi	Def2	BRAKERMDHG00005007411	7ccaf68f7297bd9daf7955c936849395	104	PRINTS	PR00271	Defensin signature	94	103	3.2E-5	TRUE	2025-06-26	IPR017982	Defensin, insect	-	-
Crabronidae	Mimumesa dahlbomi	Def2	BRAKERMDHG00005007411	7ccaf68f7297bd9daf7955c936849395	104	PRINTS	PR00271	Defensin signature	77	86	3.2E-5	TRUE	2025-06-26	IPR017982	Defensin, insect	-	-
Crabronidae	Mimumesa dahlbomi	Def2	BRAKERMDHG00005007411	7ccaf68f7297bd9daf7955c936849395	104	PRINTS	PR00271	Defensin signature	86	94	3.2E-5	TRUE	2025-06-26	IPR017982	Defensin, insect	-	-
Crabronidae	Mimumesa dahlbomi	Def2	BRAKERMDHG00005007411	7ccaf68f7297bd9daf7955c936849395	104	Gene3D	G3DSA:3.30.30.10	-	63	104	1.8E-18	TRUE	2025-06-26	IPR036574	Knottin, scorpion toxin-like superfamily	-	-
Crabronidae	Mimumesa dahlbomi	Def2	BRAKERMDHG00005007411	7ccaf68f7297bd9daf7955c936849395	104	SUPERFAMILY	SSF57095	Scorpion toxin-like	63	104	5.53E-10	TRUE	2025-06-26	IPR036574	Knottin, scorpion toxin-like superfamily	-	-
Crabronidae	Mimumesa dahlbomi	Def2	BRAKERMDHG00005007411	7ccaf68f7297bd9daf7955c936849395	104	ProSiteProfiles	PS51378	Invertebrate defensins family profile.	62	104	9.44177	TRUE	2025-06-26	IPR001542	Defensin, invertebrate/fungal	GO:0006952(InterPro)	-
Crabronidae	Mimumesa dahlbomi	Def2	BRAKERMDHG00005007411	7ccaf68f7297bd9daf7955c936849395	104	Pfam	PF01097	Arthropod defensin	72	104	3.3E-8	TRUE	2025-06-26	IPR001542	Defensin, invertebrate/fungal	GO:0006952(InterPro)	-
Crabronidae	Mimumesa dahlbomi	Def2	BRAKERMDHG00005007862	79710b6e3ad1797a6fa1986a27297216	99	Gene3D	G3DSA:3.30.30.10	-	58	99	3.1E-18	TRUE	2025-06-26	IPR036574	Knottin, scorpion toxin-like superfamily	-	-
Crabronidae	Mimumesa dahlbomi	Def2	BRAKERMDHG00005007862	79710b6e3ad1797a6fa1986a27297216	99	SUPERFAMILY	SSF57095	Scorpion toxin-like	58	99	5.81E-9	TRUE	2025-06-26	IPR036574	Knottin, scorpion toxin-like superfamily	-	-
Crabronidae	Mimumesa dahlbomi	Def2	BRAKERMDHG00005007862	79710b6e3ad1797a6fa1986a27297216	99	ProSiteProfiles	PS51378	Invertebrate defensins family profile.	57	99	9.28243	TRUE	2025-06-26	IPR001542	Defensin, invertebrate/fungal	GO:0006952(InterPro)	-
Crabronidae	Mimumesa dahlbomi	Def2	BRAKERMDHG00005007862	79710b6e3ad1797a6fa1986a27297216	99	Pfam	PF01097	Arthropod defensin	68	99	4.3E-7	TRUE	2025-06-26	IPR001542	Defensin, invertebrate/fungal	GO:0006952(InterPro)	-
Crabronidae	Nysson spinosus	Def2	ENSNSPG00005009863	d10d51b0801359580b65b545dc859574	114	Pfam	PF01097	Arthropod defensin	81	113	2.7E-7	TRUE	2025-06-26	IPR001542	Defensin, invertebrate/fungal	GO:0006952(InterPro)	-
Crabronidae	Nysson spinosus	Def2	ENSNSPG00005009863	d10d51b0801359580b65b545dc859574	114	ProSiteProfiles	PS51378	Invertebrate defensins family profile.	71	114	9.04086	TRUE	2025-06-26	IPR001542	Defensin, invertebrate/fungal	GO:0006952(InterPro)	-
Crabronidae	Nysson spinosus	Def2	ENSNSPG00005009863	d10d51b0801359580b65b545dc859574	114	SUPERFAMILY	SSF57095	Scorpion toxin-like	72	114	1.35E-8	TRUE	2025-06-26	IPR036574	Knottin, scorpion toxin-like superfamily	-	-
Crabronidae	Nysson spinosus	Def2	ENSNSPG00005009863	d10d51b0801359580b65b545dc859574	114	Gene3D	G3DSA:3.30.30.10	-	72	113	2.0E-18	TRUE	2025-06-26	IPR036574	Knottin, scorpion toxin-like superfamily	-	-
Formicidae	Solenopsis invicta	Def2	LOC105198932	4a82859b1b6c7eeb261b004d72ad1fa2	109	ProSiteProfiles	PS51378	Invertebrate defensins family profile.	66	109	9.56513	TRUE	2025-06-26	IPR001542	Defensin, invertebrate/fungal	GO:0006952(InterPro)	-
Formicidae	Solenopsis invicta	Def2	LOC105198932	4a82859b1b6c7eeb261b004d72ad1fa2	109	Gene3D	G3DSA:3.30.30.10	-	67	108	8.2E-19	TRUE	2025-06-26	IPR036574	Knottin, scorpion toxin-like superfamily	-	-
Formicidae	Solenopsis invicta	Def2	LOC105198932	4a82859b1b6c7eeb261b004d72ad1fa2	109	Pfam	PF01097	Arthropod defensin	76	108	3.7E-8	TRUE	2025-06-26	IPR001542	Defensin, invertebrate/fungal	GO:0006952(InterPro)	-
Formicidae	Solenopsis invicta	Def2	LOC105198932	4a82859b1b6c7eeb261b004d72ad1fa2	109	SUPERFAMILY	SSF57095	Scorpion toxin-like	67	109	6.66E-10	TRUE	2025-06-26	IPR036574	Knottin, scorpion toxin-like superfamily	-	-
Halictidae	Dufourea novaeangliae	Def2	LOC107190435	c49e71e8b3f9e651b62061189a4d1f93	103	ProSiteProfiles	PS51378	Invertebrate defensins family profile.	61	103	10.0431	TRUE	2025-06-26	IPR001542	Defensin, invertebrate/fungal	GO:0006952(InterPro)	-
Halictidae	Dufourea novaeangliae	Def2	LOC107190435	c49e71e8b3f9e651b62061189a4d1f93	103	SUPERFAMILY	SSF57095	Scorpion toxin-like	62	103	7.76E-10	TRUE	2025-06-26	IPR036574	Knottin, scorpion toxin-like superfamily	-	-
Halictidae	Dufourea novaeangliae	Def2	LOC107190435	c49e71e8b3f9e651b62061189a4d1f93	103	Pfam	PF01097	Arthropod defensin	72	103	1.7E-6	TRUE	2025-06-26	IPR001542	Defensin, invertebrate/fungal	GO:0006952(InterPro)	-
Halictidae	Dufourea novaeangliae	Def2	LOC107190435	c49e71e8b3f9e651b62061189a4d1f93	103	Gene3D	G3DSA:3.30.30.10	-	62	103	2.9E-18	TRUE	2025-06-26	IPR036574	Knottin, scorpion toxin-like superfamily	-	-
Halictidae	Lasioglossum lativentre	Def2	ENSLLVG00000007809	71aaf8cef8eb1afd9b63bcebb42383a3	135	Gene3D	G3DSA:3.30.30.10	-	94	135	1.1E-17	TRUE	2025-06-26	IPR036574	Knottin, scorpion toxin-like superfamily	-	-
Halictidae	Lasioglossum lativentre	Def2	ENSLLVG00000007809	71aaf8cef8eb1afd9b63bcebb42383a3	135	ProSiteProfiles	PS51378	Invertebrate defensins family profile.	93	135	9.73989	TRUE	2025-06-26	IPR001542	Defensin, invertebrate/fungal	GO:0006952(InterPro)	-
Halictidae	Lasioglossum lativentre	Def2	ENSLLVG00000007809	71aaf8cef8eb1afd9b63bcebb42383a3	135	SUPERFAMILY	SSF57095	Scorpion toxin-like	94	135	2.48E-9	TRUE	2025-06-26	IPR036574	Knottin, scorpion toxin-like superfamily	-	-
Halictidae	Lasioglossum lativentre	Def2	ENSLLVG00000007809	71aaf8cef8eb1afd9b63bcebb42383a3	135	Pfam	PF01097	Arthropod defensin	103	135	1.3E-7	TRUE	2025-06-26	IPR001542	Defensin, invertebrate/fungal	GO:0006952(InterPro)	-
Halictidae	Lasioglossum lativentre	Def2	ENSLLVG00000009065	f6e13a4dc58e8fb7e7127a3032d2a943	135	SUPERFAMILY	SSF57095	Scorpion toxin-like	94	135	6.92E-9	TRUE	2025-06-26	IPR036574	Knottin, scorpion toxin-like superfamily	-	-
Halictidae	Lasioglossum lativentre	Def2	ENSLLVG00000009065	f6e13a4dc58e8fb7e7127a3032d2a943	135	ProSiteProfiles	PS51378	Invertebrate defensins family profile.	93	135	9.59083	TRUE	2025-06-26	IPR001542	Defensin, invertebrate/fungal	GO:0006952(InterPro)	-
Halictidae	Lasioglossum lativentre	Def2	ENSLLVG00000009065	f6e13a4dc58e8fb7e7127a3032d2a943	135	Pfam	PF01097	Arthropod defensin	104	135	9.9E-8	TRUE	2025-06-26	IPR001542	Defensin, invertebrate/fungal	GO:0006952(InterPro)	-
Halictidae	Lasioglossum lativentre	Def2	ENSLLVG00000009065	f6e13a4dc58e8fb7e7127a3032d2a943	135	Gene3D	G3DSA:3.30.30.10	-	94	135	3.9E-19	TRUE	2025-06-26	IPR036574	Knottin, scorpion toxin-like superfamily	-	-
Halictidae	Lasioglossum morio	Def2	ENSLMRG00010008036	344636541dc3ce1adb7c0eb76d927403	136	Pfam	PF01097	Arthropod defensin	105	136	3.2E-7	TRUE	2025-06-26	IPR001542	Defensin, invertebrate/fungal	GO:0006952(InterPro)	-
Halictidae	Lasioglossum morio	Def2	ENSLMRG00010008036	344636541dc3ce1adb7c0eb76d927403	136	Gene3D	G3DSA:3.30.30.10	-	95	136	1.1E-17	TRUE	2025-06-26	IPR036574	Knottin, scorpion toxin-like superfamily	-	-
Halictidae	Lasioglossum morio	Def2	ENSLMRG00010008036	344636541dc3ce1adb7c0eb76d927403	136	ProSiteProfiles	PS51378	Invertebrate defensins family profile.	94	136	9.52401	TRUE	2025-06-26	IPR001542	Defensin, invertebrate/fungal	GO:0006952(InterPro)	-
Halictidae	Lasioglossum morio	Def2	ENSLMRG00010008036	344636541dc3ce1adb7c0eb76d927403	136	SUPERFAMILY	SSF57095	Scorpion toxin-like	95	136	1.45E-8	TRUE	2025-06-26	IPR036574	Knottin, scorpion toxin-like superfamily	-	-
Halictidae	Lasioglossum morio	Def2	ENSLMRG00010009948	bbf277c498f5f5d61d01fc4b96a275be	136	ProSiteProfiles	PS51378	Invertebrate defensins family profile.	94	136	9.59083	TRUE	2025-06-26	IPR001542	Defensin, invertebrate/fungal	GO:0006952(InterPro)	-
Halictidae	Lasioglossum morio	Def2	ENSLMRG00010009948	bbf277c498f5f5d61d01fc4b96a275be	136	Gene3D	G3DSA:3.30.30.10	-	95	136	2.0E-18	TRUE	2025-06-26	IPR036574	Knottin, scorpion toxin-like superfamily	-	-
Halictidae	Lasioglossum morio	Def2	ENSLMRG00010009948	bbf277c498f5f5d61d01fc4b96a275be	136	SUPERFAMILY	SSF57095	Scorpion toxin-like	95	136	3.99E-9	TRUE	2025-06-26	IPR036574	Knottin, scorpion toxin-like superfamily	-	-
Halictidae	Lasioglossum morio	Def2	ENSLMRG00010009948	bbf277c498f5f5d61d01fc4b96a275be	136	Pfam	PF01097	Arthropod defensin	104	136	9.8E-8	TRUE	2025-06-26	IPR001542	Defensin, invertebrate/fungal	GO:0006952(InterPro)	-
Halictidae	Lasioglossum pauxillum	Def2	ENSLPUG00000007684	241ea6f03e0ed745ecdbc048cbd61be2	135	Gene3D	G3DSA:3.30.30.10	-	94	135	3.9E-19	TRUE	2025-06-26	IPR036574	Knottin, scorpion toxin-like superfamily	-	-
Halictidae	Lasioglossum pauxillum	Def2	ENSLPUG00000007684	241ea6f03e0ed745ecdbc048cbd61be2	135	ProSiteProfiles	PS51378	Invertebrate defensins family profile.	93	135	9.59083	TRUE	2025-06-26	IPR001542	Defensin, invertebrate/fungal	GO:0006952(InterPro)	-
Halictidae	Lasioglossum pauxillum	Def2	ENSLPUG00000007684	241ea6f03e0ed745ecdbc048cbd61be2	135	SUPERFAMILY	SSF57095	Scorpion toxin-like	94	135	5.38E-9	TRUE	2025-06-26	IPR036574	Knottin, scorpion toxin-like superfamily	-	-
Halictidae	Lasioglossum pauxillum	Def2	ENSLPUG00000007684	241ea6f03e0ed745ecdbc048cbd61be2	135	Pfam	PF01097	Arthropod defensin	104	135	9.9E-8	TRUE	2025-06-26	IPR001542	Defensin, invertebrate/fungal	GO:0006952(InterPro)	-
Halictidae	Seladonia tumulorum	Def2	BRAKERSTMG00015016641	78d7a1bb521f841781d1c030c1c1b803	129	Pfam	PF01097	Arthropod defensin	97	129	2.4E-5	TRUE	2025-06-26	IPR001542	Defensin, invertebrate/fungal	GO:0006952(InterPro)	-
Halictidae	Seladonia tumulorum	Def2	BRAKERSTMG00015016641	78d7a1bb521f841781d1c030c1c1b803	129	Gene3D	G3DSA:3.30.30.10	-	88	129	1.5E-16	TRUE	2025-06-26	IPR036574	Knottin, scorpion toxin-like superfamily	-	-
Halictidae	Seladonia tumulorum	Def2	BRAKERSTMG00015016641	78d7a1bb521f841781d1c030c1c1b803	129	SUPERFAMILY	SSF57095	Scorpion toxin-like	88	129	1.78E-8	TRUE	2025-06-26	IPR036574	Knottin, scorpion toxin-like superfamily	-	-
Halictidae	Seladonia tumulorum	Def2	BRAKERSTMG00015016868	8c81c76fe49e6a27419f74ce769ffffb	123	Pfam	PF01097	Arthropod defensin	91	123	8.3E-8	TRUE	2025-06-26	IPR001542	Defensin, invertebrate/fungal	GO:0006952(InterPro)	-
Halictidae	Seladonia tumulorum	Def2	BRAKERSTMG00015016868	8c81c76fe49e6a27419f74ce769ffffb	123	Gene3D	G3DSA:3.30.30.10	-	83	123	2.6E-18	TRUE	2025-06-26	IPR036574	Knottin, scorpion toxin-like superfamily	-	-
Halictidae	Seladonia tumulorum	Def2	BRAKERSTMG00015016868	8c81c76fe49e6a27419f74ce769ffffb	123	ProSiteProfiles	PS51378	Invertebrate defensins family profile.	81	123	9.30814	TRUE	2025-06-26	IPR001542	Defensin, invertebrate/fungal	GO:0006952(InterPro)	-
Halictidae	Seladonia tumulorum	Def2	BRAKERSTMG00015016868	8c81c76fe49e6a27419f74ce769ffffb	123	SUPERFAMILY	SSF57095	Scorpion toxin-like	83	123	8.63E-9	TRUE	2025-06-26	IPR036574	Knottin, scorpion toxin-like superfamily	-	-
Halictidae	Sphecodes monilicornis	Def2	ENSSSOG00015001686	NA	NA	NA	NA	NA	NA	NA	NA	NA	NA	NA	NA	NA	NA
Halictidae	Sphecodes monilicornis	Def2	ENSSSOG00015001848	dcbdc2dd43d782868c2afed0ade22027	141	SUPERFAMILY	SSF57095	Scorpion toxin-like	101	141	1.57E-8	TRUE	2025-06-26	IPR036574	Knottin, scorpion toxin-like superfamily	-	-
Halictidae	Sphecodes monilicornis	Def2	ENSSSOG00015001848	dcbdc2dd43d782868c2afed0ade22027	141	Pfam	PF01097	Arthropod defensin	109	141	1.7E-7	TRUE	2025-06-26	IPR001542	Defensin, invertebrate/fungal	GO:0006952(InterPro)	-
Halictidae	Sphecodes monilicornis	Def2	ENSSSOG00015001848	dcbdc2dd43d782868c2afed0ade22027	141	Gene3D	G3DSA:3.30.30.10	-	101	141	2.7E-17	TRUE	2025-06-26	IPR036574	Knottin, scorpion toxin-like superfamily	-	-
Halictidae	Sphecodes monilicornis	Def2	ENSSSOG00015001848	dcbdc2dd43d782868c2afed0ade22027	141	ProSiteProfiles	PS51378	Invertebrate defensins family profile.	99	141	9.30814	TRUE	2025-06-26	IPR001542	Defensin, invertebrate/fungal	GO:0006952(InterPro)	-
Halictidae	Sphecodes monilicornis	Def2	ENSSSOG00015003852	NA	NA	NA	NA	NA	NA	NA	NA	NA	NA	NA	NA	NA	NA
Halictidae	Sphecodes monilicornis	Def2	ENSSSOG00015004719	90a59e43e7e6b739692ec3a2d6d5bd60	123	Gene3D	G3DSA:3.30.30.10	-	82	123	3.2E-18	TRUE	2025-06-26	IPR036574	Knottin, scorpion toxin-like superfamily	-	-
Halictidae	Sphecodes monilicornis	Def2	ENSSSOG00015004719	90a59e43e7e6b739692ec3a2d6d5bd60	123	ProSiteProfiles	PS51378	Invertebrate defensins family profile.	81	123	9.59083	TRUE	2025-06-26	IPR001542	Defensin, invertebrate/fungal	GO:0006952(InterPro)	-
Halictidae	Sphecodes monilicornis	Def2	ENSSSOG00015004719	90a59e43e7e6b739692ec3a2d6d5bd60	123	SUPERFAMILY	SSF57095	Scorpion toxin-like	82	123	4.93E-9	TRUE	2025-06-26	IPR036574	Knottin, scorpion toxin-like superfamily	-	-
Halictidae	Sphecodes monilicornis	Def2	ENSSSOG00015004719	90a59e43e7e6b739692ec3a2d6d5bd60	123	Pfam	PF01097	Arthropod defensin	92	123	4.7E-7	TRUE	2025-06-26	IPR001542	Defensin, invertebrate/fungal	GO:0006952(InterPro)	-
Megachilidae	Megachile leachella	Def2	ENSIQGG00000003970	86323429dd7c304202a2231dcc519b57	102	SUPERFAMILY	SSF57095	Scorpion toxin-like	61	102	5.27E-9	TRUE	2025-06-26	IPR036574	Knottin, scorpion toxin-like superfamily	-	-
Megachilidae	Megachile leachella	Def2	ENSIQGG00000003970	86323429dd7c304202a2231dcc519b57	102	ProSiteProfiles	PS51378	Invertebrate defensins family profile.	60	102	8.85068	TRUE	2025-06-26	IPR001542	Defensin, invertebrate/fungal	GO:0006952(InterPro)	-
Megachilidae	Megachile leachella	Def2	ENSIQGG00000003970	86323429dd7c304202a2231dcc519b57	102	Gene3D	G3DSA:3.30.30.10	-	61	102	1.9E-18	TRUE	2025-06-26	IPR036574	Knottin, scorpion toxin-like superfamily	-	-
Megachilidae	Megachile leachella	Def2	ENSIQGG00000003970	86323429dd7c304202a2231dcc519b57	102	Pfam	PF01097	Arthropod defensin	70	102	7.0E-8	TRUE	2025-06-26	IPR001542	Defensin, invertebrate/fungal	GO:0006952(InterPro)	-
Megachilidae	Megachile ligniseca	Def2	ENSMLIG00010004488	02b53bfc836c0855e83d8da94c5f8c3d	103	SUPERFAMILY	SSF57095	Scorpion toxin-like	62	103	5.38E-9	TRUE	2025-06-26	IPR036574	Knottin, scorpion toxin-like superfamily	-	-
Megachilidae	Megachile ligniseca	Def2	ENSMLIG00010004488	02b53bfc836c0855e83d8da94c5f8c3d	103	Pfam	PF01097	Arthropod defensin	71	103	7.2E-8	TRUE	2025-06-26	IPR001542	Defensin, invertebrate/fungal	GO:0006952(InterPro)	-
Megachilidae	Megachile ligniseca	Def2	ENSMLIG00010004488	02b53bfc836c0855e83d8da94c5f8c3d	103	ProSiteProfiles	PS51378	Invertebrate defensins family profile.	61	103	8.85068	TRUE	2025-06-26	IPR001542	Defensin, invertebrate/fungal	GO:0006952(InterPro)	-
Megachilidae	Megachile ligniseca	Def2	ENSMLIG00010004488	02b53bfc836c0855e83d8da94c5f8c3d	103	Gene3D	G3DSA:3.30.30.10	-	62	103	1.9E-18	TRUE	2025-06-26	IPR036574	Knottin, scorpion toxin-like superfamily	-	-
Megachilidae	Megachile rotundata	Def2	LOC105662947	107c58fab62a5ee1885e1b0ee72bd7c6	102	Gene3D	G3DSA:3.30.30.10	-	61	102	1.9E-18	TRUE	2025-06-26	IPR036574	Knottin, scorpion toxin-like superfamily	-	-
Megachilidae	Megachile rotundata	Def2	LOC105662947	107c58fab62a5ee1885e1b0ee72bd7c6	102	SUPERFAMILY	SSF57095	Scorpion toxin-like	61	102	5.27E-9	TRUE	2025-06-26	IPR036574	Knottin, scorpion toxin-like superfamily	-	-
Megachilidae	Megachile rotundata	Def2	LOC105662947	107c58fab62a5ee1885e1b0ee72bd7c6	102	ProSiteProfiles	PS51378	Invertebrate defensins family profile.	60	102	8.85068	TRUE	2025-06-26	IPR001542	Defensin, invertebrate/fungal	GO:0006952(InterPro)	-
Megachilidae	Megachile rotundata	Def2	LOC105662947	107c58fab62a5ee1885e1b0ee72bd7c6	102	Pfam	PF01097	Arthropod defensin	70	102	7.0E-8	TRUE	2025-06-26	IPR001542	Defensin, invertebrate/fungal	GO:0006952(InterPro)	-
Megachilidae	Megachile willughbiella	Def2	ENSMWIG00010009742	6dc16a0f5c7fef0eafc1d41c4764c83c	109	Pfam	PF01097	Arthropod defensin	77	109	1.7E-8	TRUE	2025-06-26	IPR001542	Defensin, invertebrate/fungal	GO:0006952(InterPro)	-
Megachilidae	Megachile willughbiella	Def2	ENSMWIG00010009742	6dc16a0f5c7fef0eafc1d41c4764c83c	109	ProSiteProfiles	PS51378	Invertebrate defensins family profile.	67	109	8.96376	TRUE	2025-06-26	IPR001542	Defensin, invertebrate/fungal	GO:0006952(InterPro)	-
Megachilidae	Megachile willughbiella	Def2	ENSMWIG00010009742	6dc16a0f5c7fef0eafc1d41c4764c83c	109	Gene3D	G3DSA:3.30.30.10	-	68	109	2.5E-17	TRUE	2025-06-26	IPR036574	Knottin, scorpion toxin-like superfamily	-	-
Megachilidae	Megachile willughbiella	Def2	ENSMWIG00010009742	6dc16a0f5c7fef0eafc1d41c4764c83c	109	SUPERFAMILY	SSF57095	Scorpion toxin-like	68	109	1.72E-8	TRUE	2025-06-26	IPR036574	Knottin, scorpion toxin-like superfamily	-	-
Megachilidae	Osmia bicornis	Def2	ENSOBBG00005012366	280de233dad332cb4cf65de70625ee55	105	Gene3D	G3DSA:3.30.30.10	-	64	105	2.9E-18	TRUE	2025-06-26	IPR036574	Knottin, scorpion toxin-like superfamily	-	-
Megachilidae	Osmia bicornis	Def2	ENSOBBG00005012366	280de233dad332cb4cf65de70625ee55	105	SUPERFAMILY	SSF57095	Scorpion toxin-like	64	105	5.38E-9	TRUE	2025-06-26	IPR036574	Knottin, scorpion toxin-like superfamily	-	-
Megachilidae	Osmia bicornis	Def2	ENSOBBG00005012366	280de233dad332cb4cf65de70625ee55	105	Pfam	PF01097	Arthropod defensin	73	105	1.2E-7	TRUE	2025-06-26	IPR001542	Defensin, invertebrate/fungal	GO:0006952(InterPro)	-
Megachilidae	Osmia bicornis	Def2	ENSOBBG00005012366	280de233dad332cb4cf65de70625ee55	105	ProSiteProfiles	PS51378	Invertebrate defensins family profile.	63	105	8.96376	TRUE	2025-06-26	IPR001542	Defensin, invertebrate/fungal	GO:0006952(InterPro)	-
Megachilidae	Stelis phaeoptera	Def2	ENSolsG00005004815	77066ae900ea3110b871019fd0827cb6	103	SUPERFAMILY	SSF57095	Scorpion toxin-like	62	103	5.38E-9	TRUE	2025-06-26	IPR036574	Knottin, scorpion toxin-like superfamily	-	-
Megachilidae	Stelis phaeoptera	Def2	ENSolsG00005004815	77066ae900ea3110b871019fd0827cb6	103	Pfam	PF01097	Arthropod defensin	71	103	7.2E-8	TRUE	2025-06-26	IPR001542	Defensin, invertebrate/fungal	GO:0006952(InterPro)	-
Megachilidae	Stelis phaeoptera	Def2	ENSolsG00005004815	77066ae900ea3110b871019fd0827cb6	103	Gene3D	G3DSA:3.30.30.10	-	62	103	1.9E-18	TRUE	2025-06-26	IPR036574	Knottin, scorpion toxin-like superfamily	-	-
Megachilidae	Stelis phaeoptera	Def2	ENSolsG00005004815	77066ae900ea3110b871019fd0827cb6	103	ProSiteProfiles	PS51378	Invertebrate defensins family profile.	61	103	8.85068	TRUE	2025-06-26	IPR001542	Defensin, invertebrate/fungal	GO:0006952(InterPro)	-
Melittidae	Macropis europaea	Def2	ENSMEOG00010001310	9b03c3fcc9584a83c552be265d14de4d	100	SUPERFAMILY	SSF57095	Scorpion toxin-like	58	99	1.52E-9	TRUE	2025-06-26	IPR036574	Knottin, scorpion toxin-like superfamily	-	-
Melittidae	Macropis europaea	Def2	ENSMEOG00010001310	9b03c3fcc9584a83c552be265d14de4d	100	ProSiteProfiles	PS51378	Invertebrate defensins family profile.	57	100	9.42121	TRUE	2025-06-26	IPR001542	Defensin, invertebrate/fungal	GO:0006952(InterPro)	-
Melittidae	Macropis europaea	Def2	ENSMEOG00010001310	9b03c3fcc9584a83c552be265d14de4d	100	Gene3D	G3DSA:3.30.30.10	-	58	99	2.9E-19	TRUE	2025-06-26	IPR036574	Knottin, scorpion toxin-like superfamily	-	-
Melittidae	Macropis europaea	Def2	ENSMEOG00010001310	9b03c3fcc9584a83c552be265d14de4d	100	Pfam	PF01097	Arthropod defensin	67	99	1.3E-8	TRUE	2025-06-26	IPR001542	Defensin, invertebrate/fungal	GO:0006952(InterPro)	-
Philanthidae	Cerceris rybyensis	Def2	ENSCRYG00005004675	6df1ad032c65daced890a60512454c7f	97	Pfam	PF01097	Arthropod defensin	64	96	3.4E-7	TRUE	2025-06-26	IPR001542	Defensin, invertebrate/fungal	GO:0006952(InterPro)	-
Philanthidae	Cerceris rybyensis	Def2	ENSCRYG00005004675	6df1ad032c65daced890a60512454c7f	97	SMART	SM00505	gth 4	56	97	0.0026	TRUE	2025-06-26	IPR003614	Knottin, scorpion toxin-like	GO:0006952(InterPro)	-
Philanthidae	Cerceris rybyensis	Def2	ENSCRYG00005004675	6df1ad032c65daced890a60512454c7f	97	ProSiteProfiles	PS51378	Invertebrate defensins family profile.	54	97	9.38523	TRUE	2025-06-26	IPR001542	Defensin, invertebrate/fungal	GO:0006952(InterPro)	-
Philanthidae	Cerceris rybyensis	Def2	ENSCRYG00005004675	6df1ad032c65daced890a60512454c7f	97	Gene3D	G3DSA:3.30.30.10	-	55	96	1.4E-18	TRUE	2025-06-26	IPR036574	Knottin, scorpion toxin-like superfamily	-	-
Philanthidae	Cerceris rybyensis	Def2	ENSCRYG00005004675	6df1ad032c65daced890a60512454c7f	97	SUPERFAMILY	SSF57095	Scorpion toxin-like	55	97	8.42E-9	TRUE	2025-06-26	IPR036574	Knottin, scorpion toxin-like superfamily	-	-
Philanthidae	Cerceris rybyensis	Def2	ENSCRYG00005004895	9d227be3fe7fb98b0d77fa908543dff3	82	Pfam	PF01097	Arthropod defensin	50	81	1.1E-6	TRUE	2025-06-26	IPR001542	Defensin, invertebrate/fungal	GO:0006952(InterPro)	-
Philanthidae	Cerceris rybyensis	Def2	ENSCRYG00005004895	9d227be3fe7fb98b0d77fa908543dff3	82	Gene3D	G3DSA:3.30.30.10	-	40	81	2.9E-18	TRUE	2025-06-26	IPR036574	Knottin, scorpion toxin-like superfamily	-	-
Philanthidae	Cerceris rybyensis	Def2	ENSCRYG00005004895	9d227be3fe7fb98b0d77fa908543dff3	82	ProSiteProfiles	PS51378	Invertebrate defensins family profile.	39	82	9.40579	TRUE	2025-06-26	IPR001542	Defensin, invertebrate/fungal	GO:0006952(InterPro)	-
Philanthidae	Cerceris rybyensis	Def2	ENSCRYG00005004895	9d227be3fe7fb98b0d77fa908543dff3	82	SUPERFAMILY	SSF57095	Scorpion toxin-like	40	82	4.36E-9	TRUE	2025-06-26	IPR036574	Knottin, scorpion toxin-like superfamily	-	-
Philanthidae	Cerceris rybyensis	Def2	ENSCRYG00005004895	9d227be3fe7fb98b0d77fa908543dff3	82	SMART	SM00505	gth 4	41	82	0.0043	TRUE	2025-06-26	IPR003614	Knottin, scorpion toxin-like	GO:0006952(InterPro)	-
Pteromalidae	Nasonia vitripennis	Def2	LOC100121630	508ead2af6f887733647a484b162437a	103	SUPERFAMILY	SSF57095	Scorpion toxin-like	61	102	2.74E-7	TRUE	2025-06-26	IPR036574	Knottin, scorpion toxin-like superfamily	-	-
Pteromalidae	Nasonia vitripennis	Def2	LOC100121630	508ead2af6f887733647a484b162437a	103	Pfam	PF01097	Arthropod defensin	71	101	0.0017	TRUE	2025-06-26	IPR001542	Defensin, invertebrate/fungal	GO:0006952(InterPro)	-
Pteromalidae	Nasonia vitripennis	Def2	LOC100121630	508ead2af6f887733647a484b162437a	103	Gene3D	G3DSA:3.30.30.10	-	61	102	3.7E-16	TRUE	2025-06-26	IPR036574	Knottin, scorpion toxin-like superfamily	-	-
Pteromalidae	Nasonia vitripennis	Def2	LOC103315847	6939dbe729c1a2371976b3267a2b21d0	118	ProSiteProfiles	PS51378	Invertebrate defensins family profile.	76	118	8.93806	TRUE	2025-06-26	IPR001542	Defensin, invertebrate/fungal	GO:0006952(InterPro)	-
Pteromalidae	Nasonia vitripennis	Def2	LOC103315847	6939dbe729c1a2371976b3267a2b21d0	118	Gene3D	G3DSA:3.30.30.10	-	78	118	2.1E-17	TRUE	2025-06-26	IPR036574	Knottin, scorpion toxin-like superfamily	-	-
Pteromalidae	Nasonia vitripennis	Def2	LOC103315847	6939dbe729c1a2371976b3267a2b21d0	118	Pfam	PF01097	Arthropod defensin	86	118	1.9E-6	TRUE	2025-06-26	IPR001542	Defensin, invertebrate/fungal	GO:0006952(InterPro)	-
Pteromalidae	Nasonia vitripennis	Def2	LOC103315847	6939dbe729c1a2371976b3267a2b21d0	118	SUPERFAMILY	SSF57095	Scorpion toxin-like	78	118	3.66E-8	TRUE	2025-06-26	IPR036574	Knottin, scorpion toxin-like superfamily	-	-
Pteromalidae	Nasonia vitripennis	Def2	LOC103315848	e75b555bdd4c345c1dd11385be6453a4	106	ProSiteProfiles	PS51378	Invertebrate defensins family profile.	64	106	9.22076	TRUE	2025-06-26	IPR001542	Defensin, invertebrate/fungal	GO:0006952(InterPro)	-
Pteromalidae	Nasonia vitripennis	Def2	LOC103315848	e75b555bdd4c345c1dd11385be6453a4	106	SUPERFAMILY	SSF57095	Scorpion toxin-like	65	106	1.64E-8	TRUE	2025-06-26	IPR036574	Knottin, scorpion toxin-like superfamily	-	-
Pteromalidae	Nasonia vitripennis	Def2	LOC103315848	e75b555bdd4c345c1dd11385be6453a4	106	Pfam	PF01097	Arthropod defensin	75	106	1.9E-6	TRUE	2025-06-26	IPR001542	Defensin, invertebrate/fungal	GO:0006952(InterPro)	-
Pteromalidae	Nasonia vitripennis	Def2	LOC103315848	e75b555bdd4c345c1dd11385be6453a4	106	Gene3D	G3DSA:3.30.30.10	-	65	106	5.0E-18	TRUE	2025-06-26	IPR036574	Knottin, scorpion toxin-like superfamily	-	-
Tenthredinidae	Athalia rosae	Def2	ENSAEAG00005002629	87764ec4dae9b86c709d81e7c4fcb373	107	Pfam	PF01097	Arthropod defensin	75	106	4.4E-5	TRUE	2025-06-26	IPR001542	Defensin, invertebrate/fungal	GO:0006952(InterPro)	-
Tenthredinidae	Athalia rosae	Def2	ENSAEAG00005002629	87764ec4dae9b86c709d81e7c4fcb373	107	ProSiteProfiles	PS51378	Invertebrate defensins family profile.	64	107	8.76844	TRUE	2025-06-26	IPR001542	Defensin, invertebrate/fungal	GO:0006952(InterPro)	-
Tenthredinidae	Athalia rosae	Def2	ENSAEAG00005002629	87764ec4dae9b86c709d81e7c4fcb373	107	SUPERFAMILY	SSF57095	Scorpion toxin-like	65	106	6.27E-9	TRUE	2025-06-26	IPR036574	Knottin, scorpion toxin-like superfamily	-	-
Tenthredinidae	Athalia rosae	Def2	ENSAEAG00005002629	87764ec4dae9b86c709d81e7c4fcb373	107	Gene3D	G3DSA:3.30.30.10	-	65	106	3.8E-17	TRUE	2025-06-26	IPR036574	Knottin, scorpion toxin-like superfamily	-	-

[truncated: 6 more sheets: Table S10, Table S11, Table S12, Table S13, Table S14, Table S15]
